# Supplementary material for: Trends of Medicinal Plant Use over the Last 2000 Years in Central Europe
Source: MDPI journal article supplement (doi:10.3390/plants12010135), 2022-12-27
Supplement: s1 [file s1]

Dal Cero M., Saller R., Leonti M., Weckerle C.S.

|                                     |                |           |                  |           |                  |                                                                        |
|-------------------------------------|----------------|-----------|------------------|-----------|------------------|------------------------------------------------------------------------|
|                                     |                |           |                  |           |                  | Appetitlosigkeit, Magen- und Darmkrämpfen, Dickdarmentzündung,         |
| <i>Achillea millefolium</i> agg.    | Asteraceae     | s pop KN  | Schafgarbe       | svst. GAS | p. 484           | Leberschwellung                                                        |
| <i>Achillea millefolium</i> agg.    | Asteraceae     | s pop KN  | Schafgarbe       | svst. GYN | p. 475           | Kräftigung der weiblichen Unterleibsorgane                             |
| <i>Achillea millefolium</i> agg.    | Asteraceae     | s pop KN  | Schafgarbe       | svst. GYN | p. 484           | Unregelmässigkeit der Periode                                          |
| <i>Achillea millefolium</i> agg.    | Asteraceae     | s pop KN  | Schafgarbe       | svst. URO | p. 475           | Betttnasser                                                            |
| <i>Achillea millefolium</i> agg.    | Asteraceae     | s pop UB  | Schafgarbe       | svst. CAR | p. 410           | venösen Gefässerkrankungen                                             |
| <i>Achillea millefolium</i> agg.    | Asteraceae     | s pop UB  | Schafgarbe       | top. DER  | p. 305           | Wundbehandlung                                                         |
| <i>Achillea millefolium</i> agg.    | Asteraceae     | s pop UB  | Schafgarbe       | top. DER  | p. 305           | Wundbehandlung                                                         |
| <i>Achillea millefolium</i> agg.    | Asteraceae     | s pop UB  | Schafgarbe       | top. DER  | p. 305           | Wundbehandlung                                                         |
| <i>Achillea millefolium</i> agg.    | Asteraceae     | s pop UB  | Schafgarbe       | svst. GAS | p. 158           | Magenkrankungen / Amara aromatica                                      |
| <i>Achillea millefolium</i> agg.    | Asteraceae     | s pop UB  | Schafgarbe       | svst. GAS | p. 158           | Magenkrankungen / Amara aromatica                                      |
| <i>Achillea millefolium</i> agg.    | Asteraceae     | s pop WI  | Schafgarbe       | top. DER  | p. 397           | Volksheilkunde: Hämostyptikum (z.B. Hämorrhoidenblutungen)             |
| <i>Achillea millefolium</i> agg.    | Asteraceae     | sci EMA   | Schafgarbe       | top. DER  | IMPC/143949/2010 | small superficial wounds                                               |
| <i>Achillea millefolium</i> agg.    | Asteraceae     | sci EMA   | Schafgarbe       | top. DER  | IMPC/143949/2010 | small superficial wounds                                               |
| <i>Achillea millefolium</i> agg.    | Asteraceae     | sci EMA   | Schafgarbe       | top. DER  | IMPC/290284/2009 | small superficial wounds                                               |
| <i>Achillea millefolium</i> agg.    | Asteraceae     | sci EMA   | Schafgarbe       | svst. GAS | IMPC/143949/2010 | complaints including bloating and flatulence                           |
| <i>Achillea millefolium</i> agg.    | Asteraceae     | sci EMA   | Schafgarbe       | svst. GAS | IMPC/290284/2009 | complaints including bloating and flatulence                           |
| <i>Achillea millefolium</i> agg.    | Asteraceae     | sci EMA   | Schafgarbe       | svst. GAS | IMPC/290284/2009 | complaints including bloating and flatulence                           |
| <i>Achillea millefolium</i> agg.    | Asteraceae     | sci EMA   | Schafgarbe       | svst. GAS | IMPC/290284/2009 | complaints including bloating and flatulence                           |
| <i>Achillea millefolium</i> agg.    | Asteraceae     | sci EMA   | Schafgarbe       | svst. GYN | IMPC/290284/2009 | minor spasms associated with menstrual periods                         |
| <i>Achillea millefolium</i> agg.    | Asteraceae     | sci ESCOP | Millefoli herba  | top. DER  | II p. 176        | skin and mucous membranes, as an insect repellent                      |
| <i>Achillea millefolium</i> agg.    | Asteraceae     | sci ESCOP | Millefoli herba  | top. GYN  | II p. 176        | spasm of the small pelvis                                              |
| <i>Acorus calamus</i> L.            | Acoraceae      | ant. DIOS | Kalmus           | svst. ANT | 1/68             | mit Vorteil wird aber auch die Wurzel den Gegengiften zu- gemischt.    |
| <i>Acorus calamus</i> L.            | Acoraceae      | ant. DIOS | Kalmus           | svst. ANT | 1/68             | und den von giftigen Thieren Gebissenen.                               |
| <i>Acorus calamus</i> L.            | Acoraceae      | ant. DIOS | Kalmus           | svst. EYE | 1/68             | Verdunkelungen auf der Pupille                                         |
| <i>Acorus calamus</i> L.            | Acoraceae      | ant. DIOS | Kalmus           | svst. GAS | 1/68             | und Leberleiden, bei Leibschnitten, Zerreißen und Krämpfen             |
| <i>Acorus calamus</i> L.            | Acoraceae      | ant. DIOS | Kalmus           | top. GYN  | 1/68             | eignet sich wie die Schwertlilie zu Sitzbädern bei Frauenkrankheiten   |
| <i>Acorus calamus</i> L.            | Acoraceae      | ant. DIOS | Kalmus           | svst. OTH | 1/68             | erweicht die Milz                                                      |
| <i>Acorus calamus</i> L.            | Acoraceae      | ant. DIOS | Kalmus           | svst. RES | 1/68             | gutes Mittel bei Lungen- Brust-                                        |
| <i>Acorus calamus</i> L.            | Acoraceae      | ant. DIOS | Kalmus           | svst. URO | 1/68             | Eine Abkochung davon getrunken treibt den Harn, ist auch ein           |
| <i>Acorus calamus</i> L.            | Acoraceae      | ant. DIOS | Kalmus           | svst. URO | 1/68             | hilft den an Harnzwang Leidenden                                       |
| <i>Acorus calamus</i> L.            | Acoraceae      | mon LO    | Kalmus           | svst. OTH | n.d.             | n.d.                                                                   |
| <i>Acorus calamus</i> L.            | Acoraceae      | ren. VAB  | Kalmus           | svst. GYN |                  | treibt fort den weiblichen Monatsbluten.                               |
| <i>Acorus calamus</i> L.            | Acoraceae      | ren. VAB  | Kalmus           | svst. GYN |                  | wider die Gebrechen der Gebärtenden / wie ein Lendenbad gebraucht      |
| <i>Acorus calamus</i> L.            | Acoraceae      | ren. TAB  | Kalmus           | top. GYN  |                  | in die Mutter gethan / heylt die umbisch fressende Geschwul derseib    |
| <i>Acorus calamus</i> L.            | Acoraceae      | ren. TAB  | Kalmus           | top. OTH  |                  | fordert den Schweiss gewaltiglich                                      |
| <i>Acorus calamus</i> L.            | Acoraceae      | ren. TAB  | Kalmus           | svd. RES  |                  | und den Rauch davon in den Mund durch ein Rohr empfangen / ve          |
| <i>Acorus calamus</i> L.            | Acoraceae      | ren. TAB  | Kalmus           | svst. URO |                  | wider die Wassersucht / Gebrechen der Nieren / wieder die Harnwindt i  |
| <i>Acorus calamus</i> L.            | Acoraceae      | ren. TAB  | Kalmus           | svst. URO |                  | erwärmet den kalten Magen / ist denjenigen fast dienlich die kein Lust |
| <i>Acorus calamus</i> L.            | Acoraceae      | s pop KN  | Kalmus           | top. DER  | p. 413           | Skruflose                                                              |
| <i>Acorus calamus</i> L.            | Acoraceae      | s pop MT  | Kalmus           | top. DER  | p. 27            | Forstbeulen, Erfrierungen                                              |
| <i>Acorus calamus</i> L.            | Acoraceae      | s pop MT  | Kalmus           | svst. GAS | p. 26            | Verdauungs- und Verdauungsorganen                                      |
| <i>Acorus calamus</i> L.            | Acoraceae      | s pop MT  | Kalmus           | svst. OTH | p. 26            | Lungenkrebs, Darmkrebs                                                 |
| <i>Acorus calamus</i> L.            | Acoraceae      | s pop UB  | Kalmus           | svst. GAS | p. 156           | Magenkrankungen / Amara aromatica                                      |
| <i>Acorus calamus</i> L.            | Acoraceae      | s pop UB  | Kalmus           | svst. GAS | p. 156           | Magenkrankungen / Amara aromatica                                      |
| <i>Acorus calamus</i> L.            | Acoraceae      | s pop UB  | Kalmus           | svst. GAS | p. 156           | Magenkrankungen / Amara aromatica                                      |
| <i>Acorus calamus</i> L.            | Acoraceae      | s pop UB  | Kalmus           | svst. GAS | p. 156           | Magenkrankungen / Amara aromatica                                      |
| <i>Acorus calamus</i> L.            | Acoraceae      | s pop UB  | Kalmus           | svst. GAS | p. 156           | Magenkrankungen / Amara aromatica                                      |
| <i>Acorus calamus</i> L.            | Acoraceae      | s pop UB  | Kalmus           | top. SKE  | p. 290           | degenerativen rheumatischen Erkrankungen                               |
| <i>Acorus calamus</i> L.            | Acoraceae      | s pop UB  | Kalmus           | top. SKE  | p. 290           | degenerativen rheumatischen Erkrankungen                               |
| <i>Acorus calamus</i> L.            | Acoraceae      | s pop WI  | Kalmus           | svst. NER | p. 117           | Volksmedizin: Nervinum                                                 |
| <i>Acorus calamus</i> L.            | Acoraceae      | sci WI    | Kalmus           | top. DER  | p. 117           | Hautreizmittel                                                         |
| <i>Acorus calamus</i> L.            | Acoraceae      | sci WI    | Kalmus           | svst. GAS | p. 117           | Amara aromaticum; Stomachikum und Karminativum                         |
| <i>Adiantum capillus-veneris</i> L. | Pteridaceae    | ant. DIOS | Frauenhaarfarn   | svst. ANT | p. 245           | hilft gegen den Biss giftiger Thiere                                   |
| <i>Adiantum capillus-veneris</i> L. | Pteridaceae    | ant. DIOS | Frauenhaarfarn   | top. DER  | p. 245           | bei Bissen giftiger Thiere benutzt                                     |
| <i>Adiantum capillus-veneris</i> L. | Pteridaceae    | ant. DIOS | Frauenhaarfarn   | top. DER  | p. 245           | Drüsen am Halse                                                        |
| <i>Adiantum capillus-veneris</i> L. | Pteridaceae    | ant. DIOS | Frauenhaarfarn   | svst. GAS | p. 245           | Magenfluss                                                             |
| <i>Adiantum capillus-veneris</i> L. | Pteridaceae    | ant. DIOS | Frauenhaarfarn   | svst. GYN | p. 245           | befördert die Menstruation und die Reinigung der Wöchnerinnen          |
| <i>Adiantum capillus-veneris</i> L. | Pteridaceae    | ant. DIOS | Frauenhaarfarn   | svst. OTH | p. 245           | hat die Kraft, bei ... Pitzkrankheiten                                 |
| <i>Adiantum capillus-veneris</i> L. | Pteridaceae    | ant. DIOS | Frauenhaarfarn   | svst. RES | p. 245           | hat die Kraft, bei Asthma, Engbrüstigkeit                              |
| <i>Adiantum capillus-veneris</i> L. | Pteridaceae    | ant. DIOS | Frauenhaarfarn   | svst. URO | p. 245           | Stein                                                                  |
| <i>Adiantum capillus-veneris</i> L. | Pteridaceae    | mon LO    | Frauenhaarfarn   | n.d. OTH  | n.d.             | n.d.                                                                   |
| <i>Adiantum capillus-veneris</i> L. | Pteridaceae    | ren. LF   | Frauenhaarfarn   | svst. ANT | XLV / XXVIII     | denen so von einem giftigen thier gebissen sind                        |
| <i>Adiantum capillus-veneris</i> L. | Pteridaceae    | ren. LF   | Frauenhaarfarn   | n.d. DER  | XLV / XXVIII     | vertreibt die kroepp                                                   |
| <i>Adiantum capillus-veneris</i> L. | Pteridaceae    | ren. LF   | Frauenhaarfarn   | top. DER  | XLV / XXVIII     | widerumb wachsen                                                       |
| <i>Adiantum capillus-veneris</i> L. | Pteridaceae    | ren. LF   | Frauenhaarfarn   | top. DER  | XLV / XXVIII     | vertreibt es die schuepe auff dem kopff                                |
| <i>Adiantum capillus-veneris</i> L. | Pteridaceae    | ren. LF   | Frauenhaarfarn   | svst. GAS | XLV / XXVIII     | denen so die geelsucht haben / stillt den bauchfluss                   |
| <i>Adiantum capillus-veneris</i> L. | Pteridaceae    | ren. LF   | Frauenhaarfarn   | svst. GAS | XLV / XXVIII     | stellet das blut speyen                                                |
| <i>Adiantum capillus-veneris</i> L. | Pteridaceae    | ren. LF   | Frauenhaarfarn   | svst. GYN | XLV / XXVIII     | brint den frawen ihre bloedigkeit und reibt auss das bürdlin           |
| <i>Adiantum capillus-veneris</i> L. | Pteridaceae    | ren. LF   | Frauenhaarfarn   | svst. OTH | XLV / XXVIII     | den miltsüchtigen                                                      |
| <i>Adiantum capillus-veneris</i> L. | Pteridaceae    | ren. LF   | Frauenhaarfarn   | svst. RES | XLV / XXVIII     | denen so einen schweren athem haben und keichen                        |
| <i>Adiantum capillus-veneris</i> L. | Pteridaceae    | ren. LF   | Frauenhaarfarn   | svst. URO | XLV / XXVIII     | treibt den harn / zernak den stein                                     |
| <i>Adiantum capillus-veneris</i> L. | Pteridaceae    | s pop VAL | Frauenhaarfarn   | svst. RES | p. 200           | bronchitis, tracheitis                                                 |
| <i>Adiantum capillus-veneris</i> L. | Pteridaceae    | s pop VAL | Frauenhaarfarn   | svst. URO | p. 200           | inflammations urinares                                                 |
| <i>Agrimonia eupatoria</i> L.       | Rosaceae       | ant. DIOS | Odermennig       | svst. ANT | p. 222           | Schlangebisse                                                          |
| <i>Agrimonia eupatoria</i> L.       | Rosaceae       | ant. DIOS | Odermennig       | top. DER  | p. 222           | heilen schwer vernarbende Geschwüre                                    |
| <i>Agrimonia eupatoria</i> L.       | Rosaceae       | ant. DIOS | Odermennig       | svst. GAS | p. 222           | dysenterie                                                             |
| <i>Agrimonia eupatoria</i> L.       | Rosaceae       | mon HVB   | Odermennig       | svst. GAS | 1-114            | krankte Eingeweide, kalter Magen                                       |
| <i>Agrimonia eupatoria</i> L.       | Rosaceae       | mon HVB   | Odermennig       | svst. GAS | 1-114            | Stuhldrang, erweicht verhärteten Magen                                 |
| <i>Agrimonia eupatoria</i> L.       | Rosaceae       | mon HVB   | Odermennig       | top. NER  | 1-114            | Wahnsinn, Wissen und das Gefühl entleert                               |
| <i>Agrimonia eupatoria</i> L.       | Rosaceae       | mon HVB   | Odermennig       | svst. RES | 1-114            | vom Speichel, Auswurf und Ausschneuzen gereinigt                       |
| <i>Agrimonia eupatoria</i> L.       | Rosaceae       | ren. LF   | Odermennig       | svst. ANT | CXXXV/CX         | denen von nattern gebissen                                             |
| <i>Agrimonia eupatoria</i> L.       | Rosaceae       | ren. LF   | Odermennig       | top. DER  | CXXXV/CX         | heylet die wunden, so sie nt leicht zur heylung schicken wollen        |
| <i>Agrimonia eupatoria</i> L.       | Rosaceae       | ren. LF   | Odermennig       | svst. GAS | CXXXV/CX         | rote rühr                                                              |
| <i>Agrimonia eupatoria</i> L.       | Rosaceae       | ren. LF   | Odermennig       | svst. GAS | CXXXV/CX         | lebersüchtigen, verstopften leber, sterckt auch dieselbigen            |
| <i>Agrimonia eupatoria</i> L.       | Rosaceae       | s pop JK  | Odermennig       | svst. CAR | p. 400           | alle Gebresten Herz                                                    |
| <i>Agrimonia eupatoria</i> L.       | Rosaceae       | s pop JK  | Odermennig       | top. DER  | p. 400           | Geschwulste und Geschwüre                                              |
| <i>Agrimonia eupatoria</i> L.       | Rosaceae       | s pop JK  | Odermennig       | top. EYE  | p. 400           | Augenleiden                                                            |
| <i>Agrimonia eupatoria</i> L.       | Rosaceae       | s pop JK  | Odermennig       | svst. GAS | p. 400           | Würmer                                                                 |
| <i>Agrimonia eupatoria</i> L.       | Rosaceae       | s pop JK  | Odermennig       | top. NER  | p. 400           | Schleimigkeit                                                          |
| <i>Agrimonia eupatoria</i> L.       | Rosaceae       | s pop JK  | Odermennig       | svst. OTH | p. 400           | Wunden                                                                 |
| <i>Agrimonia eupatoria</i> L.       | Rosaceae       | s pop JK  | Odermennig       | svst. RES | p. 400           | alle Gebresten Herz, Husten, Hals- und Mandelentzündung                |
| <i>Agrimonia eupatoria</i> L.       | Rosaceae       | s pop JK  | Odermennig       | svst. SKE | p. 400           | Rheumatismus                                                           |
| <i>Agrimonia eupatoria</i> L.       | Rosaceae       | s pop JK  | Odermennig       | top. TON  | p. 400           | Müdigkeit und Fusschmerz                                               |
| <i>Agrimonia eupatoria</i> L.       | Rosaceae       | s pop UB  | Odermennig       | svst. GAS | p. 125           | Durchfall                                                              |
| <i>Agrimonia eupatoria</i> L.       | Rosaceae       | s pop UB  | Odermennig       | svst. GAS | p. 125           | Durchfall                                                              |
| <i>Agrimonia eupatoria</i> L.       | Rosaceae       | s pop UB  | Odermennig       | svst. GAS | p. 125           | Durchfall                                                              |
| <i>Agrimonia eupatoria</i> L.       | Rosaceae       | s pop UB  | Odermennig       | top. RES  | p. 125           | chronischen Pharyngitiden der Redner und Sänger                        |
| <i>Agrimonia eupatoria</i> L.       | Rosaceae       | s pop WI  | Odermennig       | svst. GAS | p. 40            | Volksheilkunde: Cholezystopathien                                      |
| <i>Agrimonia eupatoria</i> L.       | Rosaceae       | sci EMA   | Odermennig       | top. DER  | IMPC/680597/2013 | minor inflammation of the mouth and throat /                           |
| <i>Agrimonia eupatoria</i> L.       | Rosaceae       | sci EMA   | Odermennig       | top. DER  | IMPC/680597/2013 | minor skin inflammation and small superficial wounds                   |
| <i>Agrimonia eupatoria</i> L.       | Rosaceae       | sci EMA   | Odermennig       | svst. GAS | IMPC/680597/2013 | mild diarrhoea                                                         |
| <i>Agrimonia eupatoria</i> L.       | Rosaceae       | sci EMA   | Odermennig       | svst. GAS | IMPC/680597/2013 | mild diarrhoea                                                         |
| <i>Agrimonia eupatoria</i> L.       | Rosaceae       | sci ESCOP | Agrimoniae herba | top. RES  | II p. 3          | inflammation of the oral and pharyngeal mucosa                         |
| <i>Allium cepa</i> L.               | Amaryllidaceae | ant. DIOS | Zwiebel          | svst. CAR | 152              | und für die Hämorrhoiden                                               |

Dal Cero M., Saller R., Leonti M., Weckerle C.S.



|                                                              |                 |       |       |                    |            |                                                                                      |
|--------------------------------------------------------------|-----------------|-------|-------|--------------------|------------|--------------------------------------------------------------------------------------|
| <i>Allium</i> spp. ( <i>A. sativum</i> , <i>A. ursinum</i> ) | Amariyllidaceae | mon   | MF    | Knoblauch          | syst. DER  | 5 unheilbringende Bisse heilen                                                       |
| <i>Allium</i> spp. ( <i>A. sativum</i> , <i>A. ursinum</i> ) | Amariyllidaceae | mon   | MF    | Knoblauch          | syst. DER  | 5 .grosse Geschwülste                                                                |
| <i>Allium</i> spp. ( <i>A. sativum</i> , <i>A. ursinum</i> ) | Amariyllidaceae | mon   | MF    | Knoblauch          | top. EAR   | 5 ins Ohr, wenn es schmerzt                                                          |
| <i>Allium</i> spp. ( <i>A. sativum</i> , <i>A. ursinum</i> ) | Amariyllidaceae | mon   | MF    | Knoblauch          | syst. GAS  | 5 .vertreibt es Darmwürmer, sowie Bandwürmer                                         |
| <i>Allium</i> spp. ( <i>A. sativum</i> , <i>A. ursinum</i> ) | Amariyllidaceae | mon   | MF    | Knoblauch          | syst. GAS  | 5 hilft es gegen den Stuhlzwang                                                      |
| <i>Allium</i> spp. ( <i>A. sativum</i> , <i>A. ursinum</i> ) | Amariyllidaceae | mon   | MF    | Knoblauch          | syst. GAS  | 5 Praxagoras: Gelbssucht                                                             |
| <i>Allium</i> spp. ( <i>A. sativum</i> , <i>A. ursinum</i> ) | Amariyllidaceae | mon   | MF    | Knoblauch          | vol. GAS   | 5 durch den Duft werden schädliche Spulwürmer vertrieben                             |
| <i>Allium</i> spp. ( <i>A. sativum</i> , <i>A. ursinum</i> ) | Amariyllidaceae | mon   | MF    | Knoblauch          | syst. GYN  | Hippokrates: mit dem Rauch die weiblich Scham erwärmt, die                           |
| <i>Allium</i> spp. ( <i>A. sativum</i> , <i>A. ursinum</i> ) | Amariyllidaceae | mon   | MF    | Knoblauch          | syst. NER  | 5 Nachgeburten herausgetrieben werden kann                                           |
| <i>Allium</i> spp. ( <i>A. sativum</i> , <i>A. ursinum</i> ) | Amariyllidaceae | mon   | MF    | Knoblauch          | syst. RES  | 5 Schlafen damit bestreicht, lindert es Kopfschmerz                                  |
| <i>Allium</i> spp. ( <i>A. sativum</i> , <i>A. ursinum</i> ) | Amariyllidaceae | mon   | MF    | Knoblauch          | syst. RES  | 5 hilft es gegen verschiedene Lungebeschwerden                                       |
| <i>Allium</i> spp. ( <i>A. sativum</i> , <i>A. ursinum</i> ) | Amariyllidaceae | mon   | MF    | Knoblauch          | syst. RES  | 5 gesott'n tut's dem Husten gut und stillt das Keuchen, roh wie                      |
| <i>Allium</i> spp. ( <i>A. sativum</i> , <i>A. ursinum</i> ) | Amariyllidaceae | mon   | MF    | Knoblauch          | syst. RES  | 5 gekockt macht es die rauhe Stimme klar                                             |
| <i>Allium</i> spp. ( <i>A. sativum</i> , <i>A. ursinum</i> ) | Amariyllidaceae | mon   | MF    | Knoblauch          | syst. TON  | 5 erschöpften Leib gesund machen                                                     |
| <i>Allium</i> spp. ( <i>A. sativum</i> , <i>A. ursinum</i> ) | Amariyllidaceae | mon   | MF    | Knoblauch          | syst. URO  | 5 Wassersüchtigen, trocknet die wasserflüssigen Körpersäfte                          |
| <i>Allium</i> spp. ( <i>A. sativum</i> , <i>A. ursinum</i> ) | Amariyllidaceae | mon   | MF    | Knoblauch          | syst. URO  | 5 Blasenbeschwerden und Blasenbeschwerden vermindert                                 |
| <i>Allium</i> spp. ( <i>A. sativum</i> , <i>A. ursinum</i> ) | Amariyllidaceae | mon   | MF    | Knoblauch          | syst. URO  | 5 Nierenkrankheiten                                                                  |
| <i>Allium</i> spp. ( <i>A. sativum</i> , <i>A. ursinum</i> ) | Amariyllidaceae | ren   | LF    | Knoblauch          | syst. ANT  | 5 CCCCXXI / CCLXXXII gut denen so von natern oder schlangen gebissen sind            |
| <i>Allium</i> spp. ( <i>A. sativum</i> , <i>A. ursinum</i> ) | Amariyllidaceae | ren   | LF    | Knoblauch          | syst. ANT  | 5 CCCCXXI / CCLXXXII denen so mancherley Wasser trinken müssen                       |
| <i>Allium</i> spp. ( <i>A. sativum</i> , <i>A. ursinum</i> ) | Amariyllidaceae | ren   | LF    | Knoblauch          | syst. ANT  | 5 CCCCXXIII/CCLXXXII gut denen so von natern oder schlangen gebissen sind            |
| <i>Allium</i> spp. ( <i>A. sativum</i> , <i>A. ursinum</i> ) | Amariyllidaceae | ren   | LF    | Knoblauch          | syst. ANT  | 5 CCCCXXIII/CCLXXXII denen so mancherley Wasser trinken müssen                       |
| <i>Allium</i> spp. ( <i>A. sativum</i> , <i>A. ursinum</i> ) | Amariyllidaceae | ren   | LF    | Knoblauch          | top. ANT   | 5 CCCCXXI / CCLXXXII gut denen so von einem wütenden Hund gebissen                   |
| <i>Allium</i> spp. ( <i>A. sativum</i> , <i>A. ursinum</i> ) | Amariyllidaceae | ren   | LF    | Knoblauch          | syst. APH  | 5 CCCCXXI / CCLXXXII macht lust zu den eelichen werken                               |
| <i>Allium</i> spp. ( <i>A. sativum</i> , <i>A. ursinum</i> ) | Amariyllidaceae | ren   | LF    | Knoblauch          | syst. APH  | 5 CCCCXXIII/CCLXXXII macht lust zu den eelichen werken                               |
| <i>Allium</i> spp. ( <i>A. sativum</i> , <i>A. ursinum</i> ) | Amariyllidaceae | ren   | LF    | Knoblauch          | syst. CAR  | 5 CCCCXXI / CCLXXXII macht dünn gebliet und ein rot angesicht                        |
| <i>Allium</i> spp. ( <i>A. sativum</i> , <i>A. ursinum</i> ) | Amariyllidaceae | ren   | LF    | Knoblauch          | syst. CAR  | 5 CCCCXXIII/CCLXXXII macht dünn gebliet und ein rot angesicht                        |
| <i>Allium</i> spp. ( <i>A. sativum</i> , <i>A. ursinum</i> ) | Amariyllidaceae | ren   | LF    | Knoblauch          | vol. DER   | 5 CCCCXXIII/CCLXXXII vertreibt allerley grind, rauden, masen und flecken             |
| <i>Allium</i> spp. ( <i>A. sativum</i> , <i>A. ursinum</i> ) | Amariyllidaceae | ren   | LF    | Knoblauch          | top. DER   | 5 CCCCXXI / CCLXXXII vertreibt allerley grind, rauden, masen und flecken             |
| <i>Allium</i> spp. ( <i>A. sativum</i> , <i>A. ursinum</i> ) | Amariyllidaceae | ren   | LF    | Knoblauch          | top. DER   | 5 CCCCXXI / CCLXXXII vertreibt allerley grind, rauden, masen und flecken             |
| <i>Allium</i> spp. ( <i>A. sativum</i> , <i>A. ursinum</i> ) | Amariyllidaceae | ren   | LF    | Knoblauch          | top. DER   | 5 CCCCXXIII/CCLXXXII vertreibt allerley grind, rauden, masen und flecken             |
| <i>Allium</i> spp. ( <i>A. sativum</i> , <i>A. ursinum</i> ) | Amariyllidaceae | ren   | LF    | Knoblauch          | top. DER   | 5 CCCCXXIII/CCLXXXII gut denen so von einem wütenden Hund gebissen                   |
| <i>Allium</i> spp. ( <i>A. sativum</i> , <i>A. ursinum</i> ) | Amariyllidaceae | ren   | LF    | Knoblauch          | top. DER   | 5 CCCCXXIII/CCLXXXII vertreibt allerley grind, rauden, masen und flecken             |
| <i>Allium</i> spp. ( <i>A. sativum</i> , <i>A. ursinum</i> ) | Amariyllidaceae | ren   | LF    | Knoblauch          | syst. GAS  | 5 CCCCXXI / CCLXXXII lindert den Stulgang                                            |
| <i>Allium</i> spp. ( <i>A. sativum</i> , <i>A. ursinum</i> ) | Amariyllidaceae | ren   | LF    | Knoblauch          | syst. GAS  | 5 CCCCXXI / CCLXXXII treibt aus die breiten Würmer                                   |
| <i>Allium</i> spp. ( <i>A. sativum</i> , <i>A. ursinum</i> ) | Amariyllidaceae | ren   | LF    | Knoblauch          | syst. GAS  | 5 CCCCXXIII/CCLXXXII lindert den Stulgang                                            |
| <i>Allium</i> spp. ( <i>A. sativum</i> , <i>A. ursinum</i> ) | Amariyllidaceae | ren   | LF    | Knoblauch          | syst. GAS  | 5 CCCCXXIII/CCLXXXII treibt aus die breiten Würmer                                   |
| <i>Allium</i> spp. ( <i>A. sativum</i> , <i>A. ursinum</i> ) | Amariyllidaceae | ren   | LF    | Knoblauch          | vol. GYN   | 5 CCCCXXI / CCLXXXII vertreibt allerley grind, rauden, masen und flecken             |
| <i>Allium</i> spp. ( <i>A. sativum</i> , <i>A. ursinum</i> ) | Amariyllidaceae | ren   | LF    | Knoblauch          | syst. NER  | 5 CCCCXXI / CCLXXXII macht neygunq zum Schlaf                                        |
| <i>Allium</i> spp. ( <i>A. sativum</i> , <i>A. ursinum</i> ) | Amariyllidaceae | ren   | LF    | Knoblauch          | syst. NER  | 5 CCCCXXIII/CCLXXXII macht neygunq zum Schlaf                                        |
| <i>Allium</i> spp. ( <i>A. sativum</i> , <i>A. ursinum</i> ) | Amariyllidaceae | ren   | LF    | Knoblauch          | syst. OTH  | 5 CCCCXXI / CCLXXXII tödt leuss und nissen                                           |
| <i>Allium</i> spp. ( <i>A. sativum</i> , <i>A. ursinum</i> ) | Amariyllidaceae | ren   | LF    | Knoblauch          | syst. OTH  | 5 CCCCXXIII/CCLXXXII tödt leuss und nissen                                           |
| <i>Allium</i> spp. ( <i>A. sativum</i> , <i>A. ursinum</i> ) | Amariyllidaceae | ren   | LF    | Knoblauch          | syst. RES  | 5 CCCCXXI / CCLXXXII macht helle stimm und lindert den alten Husten                  |
| <i>Allium</i> spp. ( <i>A. sativum</i> , <i>A. ursinum</i> ) | Amariyllidaceae | ren   | LF    | Knoblauch          | syst. RES  | 5 CCCCXXIII/CCLXXXII macht helle stimm und lindert den alten Husten                  |
| <i>Allium</i> spp. ( <i>A. sativum</i> , <i>A. ursinum</i> ) | Amariyllidaceae | ren   | LF    | Knoblauch          | syst. URO  | 5 CCCCXXI / CCLXXXII treibt den Harn                                                 |
| <i>Allium</i> spp. ( <i>A. sativum</i> , <i>A. ursinum</i> ) | Amariyllidaceae | ren   | LF    | Knoblauch          | syst. URO  | 5 CCCCXXIII/CCLXXXII treibt den Harn                                                 |
| <i>Allium</i> spp. ( <i>A. sativum</i> , <i>A. ursinum</i> ) | Amariyllidaceae | s pop | AV    | Knoblauch          | syst. CAR  | 39, 184, 195, 199 Arteriosklerose, hoher Blutdruck                                   |
| <i>Allium</i> spp. ( <i>A. sativum</i> , <i>A. ursinum</i> ) | Amariyllidaceae | s pop | AV    | Knoblauch          | syst. CAR  | 39, 184, 195, 199 Arteriosklerose, hoher Blutdruck                                   |
| <i>Allium</i> spp. ( <i>A. sativum</i> , <i>A. ursinum</i> ) | Amariyllidaceae | s pop | AV    | Knoblauch          | top. EAR   | p. 532 Ohrenweh                                                                      |
| <i>Allium</i> spp. ( <i>A. sativum</i> , <i>A. ursinum</i> ) | Amariyllidaceae | s pop | AV    | Knoblauch          | syst. GAS  | p. 462 Blähungsbeschwerden im Darm                                                   |
| <i>Allium</i> spp. ( <i>A. sativum</i> , <i>A. ursinum</i> ) | Amariyllidaceae | s pop | AV    | Knoblauch          | syst. GAS  | p. 462 Blähungsbeschwerden im Darm                                                   |
| <i>Allium</i> spp. ( <i>A. sativum</i> , <i>A. ursinum</i> ) | Amariyllidaceae | s pop | AV    | Knoblauch          | syst. GAS  | p. 45 Verstopfung                                                                    |
| <i>Allium</i> spp. ( <i>A. sativum</i> , <i>A. ursinum</i> ) | Amariyllidaceae | s pop | AV    | Knoblauch          | syst. GAS  | p. 531 Verstopfung, Wurmtriebend                                                     |
| <i>Allium</i> spp. ( <i>A. sativum</i> , <i>A. ursinum</i> ) | Amariyllidaceae | s pop | AV    | Knoblauch          | top. NER   | p. 532 Kopfweh                                                                       |
| <i>Allium</i> spp. ( <i>A. sativum</i> , <i>A. ursinum</i> ) | Amariyllidaceae | s pop | AV    | Knoblauch          | syst. OTH  | p. 532 Kopfweh                                                                       |
| <i>Allium</i> spp. ( <i>A. sativum</i> , <i>A. ursinum</i> ) | Amariyllidaceae | s pop | AV    | Knoblauch          | syst. OTH  | p. 531 Lymphdrüsenentzündung                                                         |
| <i>Allium</i> spp. ( <i>A. sativum</i> , <i>A. ursinum</i> ) | Amariyllidaceae | s pop | AV    | Knoblauch          | syst. RES  | p. 462 Bronchien zu viel Schleim absondern                                           |
| <i>Allium</i> spp. ( <i>A. sativum</i> , <i>A. ursinum</i> ) | Amariyllidaceae | s pop | AV    | Knoblauch          | syst. RES  | p. 462 Bronchien zu viel Schleim absondern                                           |
| <i>Allium</i> spp. ( <i>A. sativum</i> , <i>A. ursinum</i> ) | Amariyllidaceae | s pop | AV    | Knoblauch          | top. TEE   | p. 532 Zahnweh                                                                       |
| <i>Allium</i> spp. ( <i>A. sativum</i> , <i>A. ursinum</i> ) | Amariyllidaceae | s pop | AV    | Knoblauch          | syst. TON  | p. 542, 601, 613 Vitamin Mangel im Frühling, Naturnahrung, Schondiat                 |
| <i>Allium</i> spp. ( <i>A. sativum</i> , <i>A. ursinum</i> ) | Amariyllidaceae | s pop | JK    | Knoblauch          | top. ANT   | ziehen das Gift aus den Wunden, das durch Schlangen- oder                            |
| <i>Allium</i> spp. ( <i>A. sativum</i> , <i>A. ursinum</i> ) | Amariyllidaceae | s pop | JK    | Knoblauch          | top. APO   | 383 Hundebeiss entstanden sind                                                       |
| <i>Allium</i> spp. ( <i>A. sativum</i> , <i>A. ursinum</i> ) | Amariyllidaceae | s pop | JK    | Knoblauch          | syst. CAR  | 383 Zeiten ansteckender Krankheiten . . . Trage man Knoblauch bei                    |
| <i>Allium</i> spp. ( <i>A. sativum</i> , <i>A. ursinum</i> ) | Amariyllidaceae | s pop | JK    | Knoblauch          | syst. DER  | 383 sich, er wird sie neutralisieren                                                 |
| <i>Allium</i> spp. ( <i>A. sativum</i> , <i>A. ursinum</i> ) | Amariyllidaceae | s pop | JK    | Knoblauch          | top. DER   | 383 hohem Blutdruck                                                                  |
| <i>Allium</i> spp. ( <i>A. sativum</i> , <i>A. ursinum</i> ) | Amariyllidaceae | s pop | JK    | Knoblauch          | top. EAR   | 330 Flechten, Eissen und Ausschlägen, Skrofulose und Bleichsüchtige                  |
| <i>Allium</i> spp. ( <i>A. sativum</i> , <i>A. ursinum</i> ) | Amariyllidaceae | s pop | JK    | Knoblauch          | syst. GAS  | 383 Schuppen                                                                         |
| <i>Allium</i> spp. ( <i>A. sativum</i> , <i>A. ursinum</i> ) | Amariyllidaceae | s pop | JK    | Knoblauch          | syst. GAS  | 383 Ohrenwehtropfen                                                                  |
| <i>Allium</i> spp. ( <i>A. sativum</i> , <i>A. ursinum</i> ) | Amariyllidaceae | s pop | JK    | Knoblauch          | syst. HUM  | 330 Reinigung von Magen, Gedärmen und Blut                                           |
| <i>Allium</i> spp. ( <i>A. sativum</i> , <i>A. ursinum</i> ) | Amariyllidaceae | s pop | JK    | Knoblauch          | syst. HUM  | 383 vertribt die Würmer                                                              |
| <i>Allium</i> spp. ( <i>A. sativum</i> , <i>A. ursinum</i> ) | Amariyllidaceae | s pop | JK    | Knoblauch          | syst. OTH  | 383 macht Ansteckungskeime unschädlich                                               |
| <i>Allium</i> spp. ( <i>A. sativum</i> , <i>A. ursinum</i> ) | Amariyllidaceae | s pop | MT    | Knoblauch          | syst. RES  | 383 Gicht und Rheumatismus, insbesondere die schmerzhaften Darmgicht                 |
| <i>Allium</i> spp. ( <i>A. sativum</i> , <i>A. ursinum</i> ) | Amariyllidaceae | s pop | MT    | Knoblauch          | syst. URO  | 383 Nierenstein                                                                      |
| <i>Allium</i> spp. ( <i>A. sativum</i> , <i>A. ursinum</i> ) | Amariyllidaceae | s pop | MT    | Knoblauch          | syst. CAR  | Arterienverkalkung, hoher Blutdruck, Erkrankungen der                                |
| <i>Allium</i> spp. ( <i>A. sativum</i> , <i>A. ursinum</i> ) | Amariyllidaceae | s pop | MT    | Knoblauch          | syst. DER  | p. 11 Herzkranzgefässe                                                               |
| <i>Allium</i> spp. ( <i>A. sativum</i> , <i>A. ursinum</i> ) | Amariyllidaceae | s pop | MT    | Knoblauch          | top. DER   | p. 11 Blutreinigung bei chronisch unreiner Haut                                      |
| <i>Allium</i> spp. ( <i>A. sativum</i> , <i>A. ursinum</i> ) | Amariyllidaceae | s pop | MT    | Knoblauch          | syst. GAS  | p. 11 Entschlackung und Reinigung                                                    |
| <i>Allium</i> spp. ( <i>A. sativum</i> , <i>A. ursinum</i> ) | Amariyllidaceae | s pop | MT    | Knoblauch          | syst. RES  | p. 11 wirkt sehr günstig auf das Magen-Darmsystem                                    |
| <i>Allium</i> spp. ( <i>A. sativum</i> , <i>A. ursinum</i> ) | Amariyllidaceae | s pop | MT    | Knoblauch          | syst. NER  | p. 11 verheilen zu einem ausgezeichneten Gedächtnis                                  |
| <i>Allium</i> spp. ( <i>A. sativum</i> , <i>A. ursinum</i> ) | Amariyllidaceae | s pop | MT    | Knoblauch          | syst. RES  | dauernder Brustverschleimung und damit verbundenen                                   |
| <i>Allium</i> spp. ( <i>A. sativum</i> , <i>A. ursinum</i> ) | Amariyllidaceae | s pop | MT    | Knoblauch          | syst. RES  | p. 11 Atembeschwerden                                                                |
| <i>Allium</i> spp. ( <i>A. sativum</i> , <i>A. ursinum</i> ) | Amariyllidaceae | s pop | MT    | Knoblauch          | syst. URO  | Lungen- und Wassersucht, reinigen Niere und Blase und fördern                        |
| <i>Allium</i> spp. ( <i>A. sativum</i> , <i>A. ursinum</i> ) | Amariyllidaceae | s pop | UB    | Knoblauch          | syst. CAR  | p. 387 / 400 / 405 Bluthochdruck / Arteriosklerose / arterielle Durchblutungsstörung |
| <i>Allium</i> spp. ( <i>A. sativum</i> , <i>A. ursinum</i> ) | Amariyllidaceae | s pop | UB    | Knoblauch          | syst. CAR  | p. 387 / 400 / 405 Bluthochdruck / Arteriosklerose / arterielle Durchblutungsstörung |
| <i>Allium</i> spp. ( <i>A. sativum</i> , <i>A. ursinum</i> ) | Amariyllidaceae | s pop | UB    | Knoblauch          | syst. GAS  | p. 452 / 462 Darmsanierung (Ausleitung / Regeneration)                               |
| <i>Allium</i> spp. ( <i>A. sativum</i> , <i>A. ursinum</i> ) | Amariyllidaceae | s pop | UB    | Knoblauch          | syst. HUM  | p. 454 / 462 Ausleiten und Regeneration                                              |
| <i>Allium</i> spp. ( <i>A. sativum</i> , <i>A. ursinum</i> ) | Amariyllidaceae | s pop | UB    | Knoblauch          | syst. HUM  | p. 454 / 462 Ausleiten und Regeneration                                              |
| <i>Allium</i> spp. ( <i>A. sativum</i> , <i>A. ursinum</i> ) | Amariyllidaceae | s pop | UB    | Knoblauch          | syst. HUM  | p. 454 / 462 Ausleiten und Regeneration                                              |
| <i>Allium</i> spp. ( <i>A. sativum</i> , <i>A. ursinum</i> ) | Amariyllidaceae | s pop | UB    | Knoblauch          | syst. RES  | p. 207 gegen Grippeviren                                                             |
| <i>Allium</i> spp. ( <i>A. sativum</i> , <i>A. ursinum</i> ) | Amariyllidaceae | s pop | WI    | Knoblauch          | syst. CAR  | Volkshelkunde: wie Knoblauch Anthypertonikum und                                     |
| <i>Allium</i> spp. ( <i>A. sativum</i> , <i>A. ursinum</i> ) | Amariyllidaceae | s pop | WI    | Knoblauch          | syst. GAS  | p. 48 Antiarteriosklerotikum                                                         |
| <i>Allium</i> spp. ( <i>A. sativum</i> , <i>A. ursinum</i> ) | Amariyllidaceae | sci   | ESCOP | Alli sativi bulbus | syst. CAR  | p. 18 Volkshelkunde: wie Knoblauch Magendarmstörungen                                |
| <i>Allium</i> spp. ( <i>A. sativum</i> , <i>A. ursinum</i> ) | Amariyllidaceae | sci   | ESCOP | Alli sativi bulbus | syst. RES  | I p.14 treatment of elevated blood lipid levels                                      |
| <i>Allium</i> spp. ( <i>A. sativum</i> , <i>A. ursinum</i> ) | Amariyllidaceae | sci   | ESCOP | Alli sativi bulbus | syst. RES  | I p.14 upper respiratory tract infection                                             |
| <i>Allium</i> spp. ( <i>A. sativum</i> , <i>A. ursinum</i> ) | Amariyllidaceae | sci   | ESCOP | Alli sativi bulbus | syst. SKE  | I p.14 prophylaxis of arteriosclerosis                                               |
| <i>Althaea officinalis</i> L.                                | Malvaceae       | ant   | DIOS  | Eibisch            | syst. ANT  | 208 Trank gegen die Stiche der Bienen und aller kleinen Thiere                       |
| <i>Althaea officinalis</i> L.                                | Malvaceae       | ant   | DIOS  | Eibisch            | top. ANT   | 208 Schutzmittel gegen den Biss giftiger Thiere                                      |
| <i>Althaea officinalis</i> L.                                | Malvaceae       | ant   | DIOS  | Eibisch            | top. DER   | 208 bringt weisse Flecken weg                                                        |
| <i>Althaea officinalis</i> L.                                | Malvaceae       | ant   | DIOS  | Eibisch            | top. DER   | 208 bei Verwundungen und Brandwunden                                                 |
| <i>Althaea officinalis</i> L.                                | Malvaceae       | ant   | DIOS  | Eibisch            | syst. DER  | Wunden, Drüsen an den Ohren und am Halse, bei Abscessen am                           |
| <i>Althaea officinalis</i> L.                                | Malvaceae       | ant   | DIOS  | Eibisch            | syst. GAS  | 208 After, entzündeten Brüsten                                                       |
| <i>Althaea officinalis</i> L.                                | Malvaceae       | ant   | DIOS  | Eibisch            | syst. GAS  | 208 Dysenterie, Blutauswurf und Durchfall                                            |
| <i>Althaea officinalis</i> L.                                | Malvaceae       | ant   | DIOS  | Eibisch            | syst. GAS  | 208 Dysenterie                                                                       |
| <i>Althaea officinalis</i> L.                                | Malvaceae       | ant   | DIOS  | Eibisch            | top. GYN   | Zapfen gegen Entzündung und Verstopfung der Gebärmutter,                             |
| <i>Althaea officinalis</i> L.                                | Malvaceae       | ant   | DIOS  | Eibisch            | syst. n.d. | 208 Lochien                                                                          |
| <i>Althaea officinalis</i> L.                                | Malvaceae       | ant   | DIOS  | Eibisch            | n.d. n.d.  | 208 und inneren Rupturen                                                             |
| <i>Althaea officinalis</i> L.                                | Malvaceae       | ant   | DIOS  | Eibisch            | syst. NER  | 208 verdickt die Wurzel auch das Wasser                                              |
| <i>Althaea officinalis</i> L.                                | Malvaceae       | ant   | DIOS  | Eibisch            | syst. SKE  | 208 Ischias, Zittern                                                                 |
| <i>Althaea officinalis</i> L.                                | Malvaceae       | ant   | DIOS  | Eibisch            | syst. SKE  | 208 Emphysem und Sehnenanspannung                                                    |
| <i>Althaea officinalis</i> L.                                | Malvaceae       | ant   | DIOS  | Eibisch            | top. TEE   | 208 Zahnschmerzen lindert sie mit Essig gekocht als Mundspülwasser                   |
| <i>Althaea officinalis</i> L.                                | Malvaceae       | ant   | DIOS  | Eibisch            | syst. URO  | 208 hilft bei Harnverhaltung, gegen die Beschwerden der Steinkranke                  |
| <i>Althaea officinalis</i> L.                                | Malvaceae       | mon   | HvB   | Eibisch            | syst. FEV  | 1-141 gegen Fieber                                                                   |

Dal Cero M., Saller R., Leonti M., Weckerle C.S.

|                                |            |       |      |               |       |     |                  |                                                                                                                                                                                                                                           |
|--------------------------------|------------|-------|------|---------------|-------|-----|------------------|-------------------------------------------------------------------------------------------------------------------------------------------------------------------------------------------------------------------------------------------|
| <i>Anethum graveolens</i> L.   | Apiaceae   | s pop | AV   | Dill          | svst. | GYN | p. 529           | Förderung der Milch                                                                                                                                                                                                                       |
| <i>Anethum graveolens</i> L.   | Apiaceae   | s pop | AV   | Dill          | svst. | RES | p. 529           | Erkältung                                                                                                                                                                                                                                 |
| <i>Anethum graveolens</i> L.   | Apiaceae   | s pop | UB   | Dill          | svst. | NER | p. 420           | Kinderschlafmittel                                                                                                                                                                                                                        |
| <i>Anethum graveolens</i> L.   | Apiaceae   | s pop | UB   | Dill          | svst. | NER | p. 420           | Kinderschlafmittel                                                                                                                                                                                                                        |
| <i>Arctium lappa</i> agg.      | Asteraceae | ant   | DIOS | Klette        | top   | DER | 240              | Blätter werden mit Nutzen auf alte Wunden                                                                                                                                                                                                 |
| <i>Arctium lappa</i> agg.      | Asteraceae | ant   | DIOS | Klette        | svst. | RES | 240              | Blutspeien und Lungengeschwüren                                                                                                                                                                                                           |
| <i>Arctium lappa</i> agg.      | Asteraceae | ant   | DIOS | Klette        | top   | SKE | 240              | lindert sie die von Verrenkungen herrührenden Gliederschmerzen                                                                                                                                                                            |
| <i>Arctium lappa</i> agg.      | Asteraceae | mon   | HvB  | Klette        | top   | DER | 1-98             | Grind auf dem Kopf                                                                                                                                                                                                                        |
| <i>Arctium lappa</i> agg.      | Asteraceae | mon   | HvB  | Klette        | svst. | URO | 1-98             | Stein im Körper wächst von den Natern , wütenden Hunden und anderen giftigen thiern                                                                                                                                                       |
| <i>Arctium lappa</i> agg.      | Asteraceae | ren   | LF   | Grosse Klette | top   | ANT | XL / XXIII       | gebissen sind von den Natern , wütenden Hunden und anderen giftigen thiern                                                                                                                                                                |
| <i>Arctium lappa</i> agg.      | Asteraceae | ren   | LF   | Grosse Klette | top   | ANT | XL / XXIII       | gebissen sind                                                                                                                                                                                                                             |
| <i>Arctium lappa</i> agg.      | Asteraceae | ren   | LF   | Grosse Klette | top   | DER | XL / XXIII       | heylen den Brandt                                                                                                                                                                                                                         |
| <i>Arctium lappa</i> agg.      | Asteraceae | ren   | LF   | Grosse Klette | top   | DER | XL / XXIII       | vertreibt die Kropff                                                                                                                                                                                                                      |
| <i>Arctium lappa</i> agg.      | Asteraceae | ren   | LF   | Grosse Klette | svst. | RES | XL / XXIII       | ist ein köstlich Arznei, denen so Blut und Eyter auswerfen                                                                                                                                                                                |
| <i>Arctium lappa</i> agg.      | Asteraceae | ren   | LF   | Grosse Klette | top   | SKE | XL / XXIII       | alten Schaeiden                                                                                                                                                                                                                           |
| <i>Arctium lappa</i> agg.      | Asteraceae | ren   | LF   | Grosse Klette | top   | SKE | XL / XXIII       | zerbrechung oder zerknutschung der heym und gleder                                                                                                                                                                                        |
| <i>Arctium lappa</i> agg.      | Asteraceae | s pop | UB   | Grosse Klette | top   | DER | p. 366           | Haarpflege, Haarausfall                                                                                                                                                                                                                   |
| <i>Arctium lappa</i> agg.      | Asteraceae | s pop | UB   | Grosse Klette | top   | DER | p. 366           | Haarpflege, Haarausfall                                                                                                                                                                                                                   |
| <i>Arctium lappa</i> agg.      | Asteraceae | s pop | WI   | Grosse Klette | top   | DER | p. 99            | Volksmedizin: schlecht heilende Wunden, Ekzeme                                                                                                                                                                                            |
| <i>Arctium lappa</i> agg.      | Asteraceae | s pop | WI   | Grosse Klette | svst. | GAS | p. 99            | Volksmedizin: Erkrankungen und Beschwerden des Magen-                                                                                                                                                                                     |
| <i>Arctium lappa</i> agg.      | Asteraceae | s pop | WI   | Grosse Klette | svst. | SKE | p. 99            | Darmtraktes                                                                                                                                                                                                                               |
| <i>Arctium lappa</i> agg.      | Asteraceae | s pop | WI   | Grosse Klette | svst. | SKE | p. 99            | Volksmedizin: Gicht und Rheumatischen Beschwerden                                                                                                                                                                                         |
| <i>Arctium lappa</i> agg.      | Asteraceae | s pop | WI   | Grosse Klette | svst. | URO | p. 99            | Volksmedizin: Diuretikum (Blutreinigungsmittel), Blasensteinleiden                                                                                                                                                                        |
| <i>Arctium lappa</i> agg.      | Asteraceae | sci   | EMA  | Klettenwurzel | svst. | URO | IPMC/246763/2009 | an adjuvant in minor urinary tract complaints                                                                                                                                                                                             |
| <i>Arctium lappa</i> agg.      | Asteraceae | sci   | EMA  | Klettenwurzel | svst. | URO | IPMC/246763/2009 | an adjuvant in minor urinary tract complaints                                                                                                                                                                                             |
| <i>Arctium lappa</i> agg.      | Asteraceae | sci   | WI   | Grosse Klette | top   | DER | p. 99            | Klettenwurzelöl gegen trockene Seborrhoe der Kopfhaut                                                                                                                                                                                     |
| <i>Artemisia abrotanum</i> L.  | Asteraceae | ant   | DIOS | Eberraute     | svst. | ANT | 175              | Gegengift gegen tödliche Gifte; mit Wein genommen hilft er auch gegen ihre Bisse. Besonders ist er von guter Wirkung                                                                                                                      |
| <i>Artemisia abrotanum</i> L.  | Asteraceae | ant   | DIOS | Eberraute     | top   | DER | 175              | gegen Spinnen- und Skorpionstiche;                                                                                                                                                                                                        |
| <i>Artemisia abrotanum</i> L.  | Asteraceae | ant   | DIOS | Eberraute     | top   | EYE | 175              | zerteilt er Geschwülste                                                                                                                                                                                                                   |
| <i>Artemisia abrotanum</i> L.  | Asteraceae | ant   | DIOS | Eberraute     | top   | FEV | 175              | Heilmittel bei Augentzündungen                                                                                                                                                                                                            |
| <i>Artemisia abrotanum</i> L.  | Asteraceae | ant   | DIOS | Eberraute     | top   | FEV | 175              | eine Salbe gegen Frostschauer                                                                                                                                                                                                             |
| <i>Artemisia abrotanum</i> L.  | Asteraceae | ant   | DIOS | Eberraute     | svst. | GYN | 175              | Zurückbleiben der Menstruation                                                                                                                                                                                                            |
| <i>Artemisia abrotanum</i> L.  | Asteraceae | ant   | DIOS | Eberraute     | vol   | OTH | 175              | Als Lagerstreu und als Räucherung angezündet verscheucht er die Schlangen                                                                                                                                                                 |
| <i>Artemisia abrotanum</i> L.  | Asteraceae | ant   | DIOS | Eberraute     | svst. | OTH | 175              | Orthopnoe                                                                                                                                                                                                                                 |
| <i>Artemisia abrotanum</i> L.  | Asteraceae | ant   | DIOS | Eberraute     | svst. | SKE | 175              | innere Rupturen, Krämpfe, Ischias                                                                                                                                                                                                         |
| <i>Artemisia abrotanum</i> L.  | Asteraceae | ant   | DIOS | Eberraute     | svst. | URO | 175              | Harnverhaltung                                                                                                                                                                                                                            |
| <i>Artemisia abrotanum</i> L.  | Asteraceae | mon   | HvB  | Eberraute     | top   | DER | 1-106            | Grind                                                                                                                                                                                                                                     |
| <i>Artemisia abrotanum</i> L.  | Asteraceae | mon   | HvB  | Eberraute     | top   | DER | 1-106            | Beulen, Glieder im Menschen zusammengezogen                                                                                                                                                                                               |
| <i>Artemisia abrotanum</i> L.  | Asteraceae | mon   | HvB  | Eberraute     | top   | SKE | 1-106            | Gicht                                                                                                                                                                                                                                     |
| <i>Artemisia abrotanum</i> L.  | Asteraceae | mon   | MF   | Eberraute     | svst. | ANT | 2                | Geruch vertreibt Schlangen, wenn man es trinkt, nimmt's deren Gift seine Kraft                                                                                                                                                            |
| <i>Artemisia abrotanum</i> L.  | Asteraceae | mon   | MF   | Eberraute     | svst. | APH | 2                | Liebeskraft regt es an, sobald du's unters Kissen legts                                                                                                                                                                                   |
| <i>Artemisia abrotanum</i> L.  | Asteraceae | mon   | MF   | Eberraute     | svst. | EYE | 2                | Augenschmerzen, Augenbrennen                                                                                                                                                                                                              |
| <i>Artemisia abrotanum</i> L.  | Asteraceae | mon   | MF   | Eberraute     | svst. | FEV | 2                | stills es die Fieberfroste, noch bevor sie kommen                                                                                                                                                                                         |
| <i>Artemisia abrotanum</i> L.  | Asteraceae | mon   | MF   | Eberraute     | svst. | GAS | 2                | tötet Spulwürmer                                                                                                                                                                                                                          |
| <i>Artemisia abrotanum</i> L.  | Asteraceae | mon   | MF   | Eberraute     | svst. | GYN | 2                | hilft es den Leiden und allen Beschwerden der weiblichen Scham                                                                                                                                                                            |
| <i>Artemisia abrotanum</i> L.  | Asteraceae | mon   | MF   | Eberraute     | svst. | GYN | 2                | regt mit abgetrunkenen Mosten                                                                                                                                                                                                             |
| <i>Artemisia abrotanum</i> L.  | Asteraceae | mon   | MF   | Eberraute     | svst. | HUM | 2                | putzt durch den Harn und reinigt Herz und Leber                                                                                                                                                                                           |
| <i>Artemisia abrotanum</i> L.  | Asteraceae | mon   | MF   | Eberraute     | svst. | HUM | 2                | hilft es allen Krankheitsfällen in der Brust, Atemnot, drängt Husten                                                                                                                                                                      |
| <i>Artemisia abrotanum</i> L.  | Asteraceae | mon   | MF   | Eberraute     | svst. | RES | 2                | zurück                                                                                                                                                                                                                                    |
| <i>Artemisia abrotanum</i> L.  | Asteraceae | mon   | MF   | Eberraute     | svst. | SKE | 2                | hilft es den Muskeln                                                                                                                                                                                                                      |
| <i>Artemisia abrotanum</i> L.  | Asteraceae | mon   | MF   | Eberraute     | svst. | SKE | 2                | tut gut bei Hüftgicht                                                                                                                                                                                                                     |
| <i>Artemisia abrotanum</i> L.  | Asteraceae | ren   | LF   | Eberraute     | svst. | ANT | III / II         | ist krefftig wider allerley tödtlich Gift bringt Lust zu den Frawn und vertreibt auch allerley Zauberey so                                                                                                                                |
| <i>Artemisia abrotanum</i> L.  | Asteraceae | ren   | LF   | Eberraute     | n.d.  | APH | III / II         | disen Lust und begird verhindern.                                                                                                                                                                                                         |
| <i>Artemisia abrotanum</i> L.  | Asteraceae | ren   | LF   | Eberraute     | top   | DER | III / II         | gut den so frostig seind und welchen die haut schaudert                                                                                                                                                                                   |
| <i>Artemisia abrotanum</i> L.  | Asteraceae | ren   | LF   | Eberraute     | top   | DER | III / II         | für das ausfallen der Haar                                                                                                                                                                                                                |
| <i>Artemisia abrotanum</i> L.  | Asteraceae | ren   | LF   | Eberraute     | n.d.  | GAS | III / II         | tötet die Würm im Leib                                                                                                                                                                                                                    |
| <i>Artemisia abrotanum</i> L.  | Asteraceae | ren   | LF   | Eberraute     | svst. | GYN | III / II         | bringen auch den Frawn ihr Krankheyt                                                                                                                                                                                                      |
| <i>Artemisia abrotanum</i> L.  | Asteraceae | ren   | LF   | Eberraute     | svst. | RES | III / II         | den keichenden                                                                                                                                                                                                                            |
| <i>Artemisia abrotanum</i> L.  | Asteraceae | ren   | LF   | Eberraute     | svst. | SKE | III / II         | gebrochenen, weetenag der hüft                                                                                                                                                                                                            |
| <i>Artemisia abrotanum</i> L.  | Asteraceae | ren   | LF   | Eberraute     | svst. | URO | III / II         | denen so schwachlich harnen                                                                                                                                                                                                               |
| <i>Artemisia abrotanum</i> L.  | Asteraceae | s pop | VAL  | Eberraute     | svst. | GAS | p. 160           | digestion pénibles                                                                                                                                                                                                                        |
| <i>Artemisia abrotanum</i> L.  | Asteraceae | s pop | VAL  | Eberraute     | svst. | GYN | p. 160           | menstruation difficiles                                                                                                                                                                                                                   |
| <i>Artemisia abrotanum</i> L.  | Asteraceae | s pop | VAL  | Eberraute     | svst. | OTH | p. 160           | parasites intestinaux                                                                                                                                                                                                                     |
| <i>Artemisia abrotanum</i> L.  | Asteraceae | s pop | VAL  | Eberraute     | top   | URO | p. 160           | und denen so schwachlich harnen                                                                                                                                                                                                           |
| <i>Artemisia absinthium</i> L. | Asteraceae | ant   | DIOS | Wermut        | svst. | ANT | 173              | gegen die verderbliche Wirkung von (giftigen) Pilzen, mit Wein aber gegen Ixia und Schierling, gegen den Biß der Spitzmaus und den Meerdraehen                                                                                            |
| <i>Artemisia absinthium</i> L. | Asteraceae | ant   | DIOS | Wermut        | top   | DER | 173              | Gegen Schlundmuskulenzündung, gegen Epinyktiden mit Wasser, gegen Sugillationen unter den Augen                                                                                                                                           |
| <i>Artemisia absinthium</i> L. | Asteraceae | ant   | DIOS | Wermut        | top   | EAR | 173              | elterfussige Ohren                                                                                                                                                                                                                        |
| <i>Artemisia absinthium</i> L. | Asteraceae | ant   | DIOS | Wermut        | vol   | EAR | 173              | Ohrschmerzen                                                                                                                                                                                                                              |
| <i>Artemisia absinthium</i> L. | Asteraceae | ant   | DIOS | Wermut        | top   | EYE | 173              | gegen Stumpfsichtigkeit                                                                                                                                                                                                                   |
| <i>Artemisia absinthium</i> L. | Asteraceae | ant   | DIOS | Wermut        | top   | EYE | 173              | schmerzhaftige Augen                                                                                                                                                                                                                      |
| <i>Artemisia absinthium</i> L. | Asteraceae | ant   | DIOS | Wermut        | svst. | OTH | 173              | Verdauung zu befördern, und Magen und Bauch von hineingedrungenen galligen Stoffen zu reinigen; gutes Mittel gegen Blähungen und Bauch- und Magenschmerzen, auch heilt der Aufguß oder die Abkochung davon Appetitlosigkeit und Gelbsucht |
| <i>Artemisia absinthium</i> L. | Asteraceae | ant   | DIOS | Wermut        | top   | GAS | 173              | Unterleibs-, gegen Leber- und Magenschmerzen, auch wenn sie chronische Leiden sind                                                                                                                                                        |
| <i>Artemisia absinthium</i> L. | Asteraceae | ant   | DIOS | Wermut        | svst. | GYN | 173              | berodit es die Katamenien                                                                                                                                                                                                                 |
| <i>Artemisia absinthium</i> L. | Asteraceae | ant   | DIOS | Wermut        | svst. | GYN | 173              | befördert es die Katamenien                                                                                                                                                                                                               |
| <i>Artemisia absinthium</i> L. | Asteraceae | ant   | DIOS | Wermut        | svst. | OTH | 173              | in den Schränken aufgehängt, die Kleider vor Mottenfraß zu schützen und mit Öl zusammen als Salbe die Mücken abzuhalten, so daß sie den Körper nicht belästigen                                                                           |
| <i>Artemisia absinthium</i> L. | Asteraceae | ant   | DIOS | Wermut        | svst. | OTH | 173              | Wasser- und Milzsüchtigen bringt es Besserung (Fieberfreiheit)                                                                                                                                                                            |
| <i>Artemisia absinthium</i> L. | Asteraceae | ant   | DIOS | Wermut        | top   | OTH | 173              | Wasser- und Milzsüchtigen bringt es Besserung                                                                                                                                                                                             |
| <i>Artemisia absinthium</i> L. | Asteraceae | ant   | DIOS | Wermut        | svst. | OTH | 173              | verhindert, wenn es vorher genommen wird, den Rausch                                                                                                                                                                                      |
| <i>Artemisia absinthium</i> L. | Asteraceae | ant   | DIOS | Wermut        | vol   | TEE | 173              | Zahnschmerzen                                                                                                                                                                                                                             |
| <i>Artemisia absinthium</i> L. | Asteraceae | ant   | DIOS | Wermut        | svst. | TON | 173              | daß er der Gesundheit zuträglich sei                                                                                                                                                                                                      |
| <i>Artemisia absinthium</i> L. | Asteraceae | ant   | DIOS | Wermut        | svst. | URO | 173              | Wasser- und Milzsüchtigen bringt es Besserung (Fieberfreiheit)                                                                                                                                                                            |
| <i>Artemisia absinthium</i> L. | Asteraceae | ant   | DIOS | Wermut        | svst. | URO | 173              | treibt den Harn                                                                                                                                                                                                                           |
| <i>Artemisia absinthium</i> L. | Asteraceae | ant   | DIOS | Wermut        | top   | URO | 173              | Wasser- und Milzsüchtigen bringt es Besserung                                                                                                                                                                                             |
| <i>Artemisia absinthium</i> L. | Asteraceae | mon   | HvB  | Beifuss       | svst. | GAS | 1-107            | heilt er kranke Eingeweide, und er wärmt den kranken Magen                                                                                                                                                                                |
| <i>Artemisia absinthium</i> L. | Asteraceae | mon   | HvB  | Wermut        | svst. | HUM | 1-109            | und reinigt die Eingeweide, bereitet gute Verdauung                                                                                                                                                                                       |
| <i>Artemisia absinthium</i> L. | Asteraceae | mon   | HvB  | Wermut        | top   | NER | 1-109            | Kopfschmerzen                                                                                                                                                                                                                             |
| <i>Artemisia absinthium</i> L. | Asteraceae | mon   | HvB  | Wermut        | top   | RES | 1-109            | Schmerzen in er Brust, so dass er hustet                                                                                                                                                                                                  |
| <i>Artemisia absinthium</i> L. | Asteraceae | mon   | HvB  | Wermut        | top   | RES | 1-109            | um die Brust schmerzen leidet und hustet                                                                                                                                                                                                  |
| <i>Artemisia absinthium</i> L. | Asteraceae | mon   | HvB  | Wermut        | top   | SKE | 1-109            | Gicht                                                                                                                                                                                                                                     |
| <i>Artemisia absinthium</i> L. | Asteraceae | mon   | HvB  | Wermut        | svst. | TEE | 1-109            | an den Zähnen leidet                                                                                                                                                                                                                      |
| <i>Artemisia absinthium</i> L. | Asteraceae | mon   | HvB  | Wermut        | top   | TEE | 1-109            | an den Zähnen leidet                                                                                                                                                                                                                      |
| <i>Artemisia absinthium</i> L. | Asteraceae | mon   | MF   | Wermuthkraut  | svst. | ANT | 3                | Gifte von Pilzen vertreibt es, dem todbringenden Schierling, tritt auch den Bissen von giftigen Tieren entgegen                                                                                                                           |

Dal Cero M., Saller R., Leonti M., Weckerle C.S.



|                              |                  |       |      |           |           |                    |                                                                                                                                                                                                     |
|------------------------------|------------------|-------|------|-----------|-----------|--------------------|-----------------------------------------------------------------------------------------------------------------------------------------------------------------------------------------------------|
| <i>Arum maculatum</i> agg.   | Araceae          | mon   | HvB  | Aronstab  | syst. NER | 1-49               | ein Mensch, in dem die Melancholie wächst, der hat ein finstres Gemüt und ist immer traurig                                                                                                         |
| <i>Arum maculatum</i> agg.   | Araceae          | mon   | HvB  | Aronstab  | syst. SKE | 1-49               | wenn ein Mensch so unter Gicht leidet, dass alle Glieder versagend fallen, und dass seine Zunge beim Sprechen versagt, wenn ein Mensch so unter Gicht leidet, dass alle Glieder versagend           |
| <i>Arum maculatum</i> agg.   | Araceae          | mon   | HvB  | Aronstab  | syst. SKE | 1-49               | fallen, und dass seine Zunge beim Sprechen versagt, wenn ein Mensch so unter Gicht leidet, dass alle Glieder versagend                                                                              |
| <i>Arum maculatum</i> agg.   | Araceae          | ren   | LF   | Aronstab  | top. DER  | XXXIX / XXII       | heilen die alten bösen schaden und fisteln                                                                                                                                                          |
| <i>Arum maculatum</i> agg.   | Araceae          | ren   | LF   | Aronstab  | top. DER  | XXXIX / XXII       | in oel gesotten und warm darauß gesessen heylet die feig blattern                                                                                                                                   |
| <i>Arum maculatum</i> agg.   | Araceae          | ren   | LF   | Aronstab  | n.d. DER  | XXXIX / XXII       | gut zu den geschwulsten insonderheyt der oren                                                                                                                                                       |
| <i>Arum maculatum</i> agg.   | Araceae          | ren   | LF   | Aronstab  | top. DER  | XXXIX / XXII       | macht das angesicht sauber                                                                                                                                                                          |
| <i>Arum maculatum</i> agg.   | Araceae          | ren   | LF   | Aronstab  | top. DER  |                    | so reinigt sie alle unseuberkeit der alten wunden und fürderts zur heylung / sie vertreibt auch das faule fleisch so in den wunden wechst / beide bletter un wurzel auf die pestilenz blasen gelegt |
| <i>Arum maculatum</i> agg.   | Araceae          | ren   | LF   | Aronstab  | top. DER  | XXXIX / XXII       | benemen das giff der selbigen und heylen sie die auffwerffende kaes in die Aron bletter wickelt . . .so bleibt der                                                                                  |
| <i>Arum maculatum</i> agg.   | Araceae          | ren   | LF   | Aronstab  | n.d. OTH  | XXXIX / XXII       | kaes gut und wahrhaftig unreiner Haut und bei fressenden Wunden, vertreibt die Knollen am                                                                                                           |
| <i>Arum maculatum</i> agg.   | Araceae          | s pop | JK   | Aronstab  | top. DER  | p. 326             | Leibe, das den austretenden After zurückdrängt                                                                                                                                                      |
| <i>Arum maculatum</i> agg.   | Araceae          | s pop | JK   | Aronstab  | syst. FEV | p. 326             | wenn ansteckende Krankheiten umgehen, wie Grippe oder Influenza                                                                                                                                     |
| <i>Arum maculatum</i> agg.   | Araceae          | s pop | JK   | Aronstab  | syst. GAS | p. 326             | reinigt den Magen                                                                                                                                                                                   |
| <i>Arum maculatum</i> agg.   | Araceae          | s pop | JK   | Aronstab  | syst. GAS | p. 326             | Magenverschleimung                                                                                                                                                                                  |
| <i>Arum maculatum</i> agg.   | Araceae          | s pop | JK   | Aronstab  | syst. RES | p. 326             | reinigt die Lungen                                                                                                                                                                                  |
| <i>Arum maculatum</i> agg.   | Araceae          | s pop | JK   | Aronstab  | syst. RES | p. 326             | reinigt die Lunge von zähem Schleim                                                                                                                                                                 |
| <i>Arum maculatum</i> agg.   | Araceae          | s pop | JK   | Aronstab  | syst. RES | p. 326             | verhockten Lungenkatarrh                                                                                                                                                                            |
| <i>Asarum europaeum</i> agg. | Aristolochiaceae | ant   | DIOS | Haselwurz | syst. GYN | 71                 | die monatliche Reinigung befördernd                                                                                                                                                                 |
| <i>Asarum europaeum</i> agg. | Aristolochiaceae | ant   | DIOS | Haselwurz | syst. HUM | 71                 | brechererregend                                                                                                                                                                                     |
| <i>Asarum europaeum</i> agg. | Aristolochiaceae | ant   | DIOS | Haselwurz | syst. SKE | 71                 | Ischias                                                                                                                                                                                             |
| <i>Asarum europaeum</i> agg. | Aristolochiaceae | ant   | DIOS | Haselwurz | syst. URO | 71                 | Wassersüchtige                                                                                                                                                                                      |
| <i>Asarum europaeum</i> agg. | Aristolochiaceae | ant   | DIOS | Haselwurz | syst. URO | 71                 | harttreibend                                                                                                                                                                                        |
| <i>Asarum europaeum</i> agg. | Aristolochiaceae | mon   | HvB  | Haselwurz | syst. OTH | 1-48               | . . .würde sie ihm grösseren Schmerz verursachen                                                                                                                                                    |
| <i>Asarum europaeum</i> agg. | Aristolochiaceae | mon   | MF   | Haselwurz | syst. GAS | 46                 | heilt den Leberschmerz                                                                                                                                                                              |
| <i>Asarum europaeum</i> agg. | Aristolochiaceae | mon   | MF   | Haselwurz | syst. GAS | 46                 | soll Gelbsucht vertreiben                                                                                                                                                                           |
| <i>Asarum europaeum</i> agg. | Aristolochiaceae | mon   | MF   | Haselwurz | syst. GYN | 46                 | sorgt für geordneten Monatsfluss                                                                                                                                                                    |
| <i>Asarum europaeum</i> agg. | Aristolochiaceae | mon   | MF   | Haselwurz | syst. GYN | 46                 | hilft auch bei Leiden der weiblichen Scham                                                                                                                                                          |
| <i>Asarum europaeum</i> agg. | Aristolochiaceae | mon   | MF   | Haselwurz | syst. HUM | 46                 | reinigt durch Auslesung nach oben Herz und Brust (Purgieren)                                                                                                                                        |
| <i>Asarum europaeum</i> agg. | Aristolochiaceae | mon   | MF   | Haselwurz | syst. SKE | 46                 | schlägt Hufgicht in die Flucht                                                                                                                                                                      |
| <i>Asarum europaeum</i> agg. | Aristolochiaceae | mon   | MF   | Haselwurz | syst. URO | 46                 | hilft Wassersüchtigen                                                                                                                                                                               |
| <i>Asarum europaeum</i> agg. | Aristolochiaceae | mon   | MF   | Haselwurz | syst. URO | 46                 | treibt den Harn                                                                                                                                                                                     |
| <i>Asarum europaeum</i> agg. | Aristolochiaceae | ren   | LF   | Haselwurz | syst. ANT | V / III            | denen von giftigen thieren gebissen                                                                                                                                                                 |
| <i>Asarum europaeum</i> agg. | Aristolochiaceae | ren   | LF   | Haselwurz | syst. CAR | V / III            | dient auch wohl den Wassersüchtigen und den weetagen der Hüft                                                                                                                                       |
| <i>Asarum europaeum</i> agg. | Aristolochiaceae | ren   | LF   | Haselwurz | top. DER  | V / III            | rootlauff                                                                                                                                                                                           |
| <i>Asarum europaeum</i> agg. | Aristolochiaceae | ren   | LF   | Haselwurz | top. EYE  | V / III            | hitzigen augen ; stercket das hirn und gedechnuss                                                                                                                                                   |
| <i>Asarum europaeum</i> agg. | Aristolochiaceae | ren   | LF   | Haselwurz | syst. GYN | V / III            | bringt den frauen ihr krankheyt                                                                                                                                                                     |
| <i>Asarum europaeum</i> agg. | Aristolochiaceae | ren   | LF   | Haselwurz | syst. HUM |                    | treibt aus durch den Stuhlgang                                                                                                                                                                      |
| <i>Asarum europaeum</i> agg. | Aristolochiaceae | ren   | LF   | Haselwurz | top. NER  | V / III            | weetagen des haupts                                                                                                                                                                                 |
| <i>Asarum europaeum</i> agg. | Aristolochiaceae | ren   | LF   | Haselwurz | syst. RES | V / III            | vertreibt auch das keichen von husten                                                                                                                                                               |
| <i>Asarum europaeum</i> agg. | Aristolochiaceae | ren   | LF   | Haselwurz | syst. URO | V / III            | treibt den Harn                                                                                                                                                                                     |
| <i>Asarum europaeum</i> agg. | Aristolochiaceae | s pop | VAL  | Haselwurz | syst. RES | p. 152             | Bronchite, Asthma                                                                                                                                                                                   |
| <i>Asarum europaeum</i> agg. | Aristolochiaceae | s pop | VAL  | Haselwurz | syst. RES | p. 152             | Bronchite, Asthma                                                                                                                                                                                   |
| <i>Avena sativa</i> agg.     | Poaceae          | ant   | DIOS | Hafer     | top. DER  | 137                | Kataplasmen [unspezifisch]                                                                                                                                                                          |
| <i>Avena sativa</i> agg.     | Poaceae          | ant   | DIOS | Hafer     | syst. GAS | 137                | Durchfall                                                                                                                                                                                           |
| <i>Avena sativa</i> agg.     | Poaceae          | ant   | DIOS | Hafer     | syst. RES | 137                | gut gegen Husten                                                                                                                                                                                    |
| <i>Avena sativa</i> agg.     | Poaceae          | ant   | DIOS | Hafer     | syst. RES |                    | wer an Gicht leidet und davon einen gespaltenen Geist und nichtige                                                                                                                                  |
| <i>Avena sativa</i> agg.     | Poaceae          | mon   | HvB  | Hafer     | vol. NER  | 1-3                | Gedanken hat                                                                                                                                                                                        |
| <i>Avena sativa</i> agg.     | Poaceae          | mon   | HvB  | Hafer     | syst. OTH | 1-3                | die etwas und massig kränken, ist er gut zu essen                                                                                                                                                   |
| <i>Avena sativa</i> agg.     | Poaceae          | ren   | LF   | Hafer     | top. DER  | CIII / LXVII       | vertreibt die masen, zerteilet geschwulst und geschwaer                                                                                                                                             |
| <i>Avena sativa</i> agg.     | Poaceae          | ren   | LF   | Hafer     | syst. GAS | CIII / LXVII       | stopft den stuhlgang                                                                                                                                                                                |
| <i>Avena sativa</i> agg.     | Poaceae          | ren   | LF   | Hafer     | syst. GYN | CIII / LXVII       | Hafer gleich wie Gerste: mehret den Weibern die Milch                                                                                                                                               |
| <i>Avena sativa</i> agg.     | Poaceae          | s pop | AV   | Hafer     | syst. CAR | p. 217             | nährendes Herzmittel                                                                                                                                                                                |
| <i>Avena sativa</i> agg.     | Poaceae          | s pop | AV   | Hafer     | top. DER  | p. 472             | bringt mangelnde Hauttätigkeit wieder in Ordnung                                                                                                                                                    |
| <i>Avena sativa</i> agg.     | Poaceae          | s pop | AV   | Hafer     | syst. EYE | p. 124             | Augenleiden                                                                                                                                                                                         |
| <i>Avena sativa</i> agg.     | Poaceae          | s pop | AV   | Hafer     | syst. GAS | 295, 308, 470, 472 | Magen- Darmschleimhautentzündungen                                                                                                                                                                  |
| <i>Avena sativa</i> agg.     | Poaceae          | s pop | AV   | Hafer     | syst. GAS | p. 89              | Kleinkindnahrung                                                                                                                                                                                    |
| <i>Avena sativa</i> agg.     | Poaceae          | s pop | AV   | Hafer     | syst. GYN | p. 140             | Weissfluss                                                                                                                                                                                          |
| <i>Avena sativa</i> agg.     | Poaceae          | s pop | AV   | Hafer     | syst. NER | p. 471             | Nerven regeneriert und neue Nervenkraft verleiht                                                                                                                                                    |
| <i>Avena sativa</i> agg.     | Poaceae          | s pop | AV   | Hafer     | other NER | p. 107, 271        | Gehirn und Nervengrippe, Schlaflosigkeit                                                                                                                                                            |
| <i>Avena sativa</i> agg.     | Poaceae          | s pop | AV   | Hafer     | syst. OTH | p. 176             | Lymphgranulomatose Hodgkinsche Krankheit                                                                                                                                                            |
| <i>Avena sativa</i> agg.     | Poaceae          | s pop | AV   | Hafer     | syst. RES | p. 471             | Katarrhe, Husten, Fieberhafte Zustände                                                                                                                                                              |
| <i>Avena sativa</i> agg.     | Poaceae          | s pop | AV   | Hafer     | syst. RES |                    | Getränk nahrhaft, leicht verdaulich, kühlend bei vorhandenen                                                                                                                                        |
| <i>Avena sativa</i> agg.     | Poaceae          | s pop | KN   | Hafer     | syst. GAS | p. 467             | inneren Hitzten                                                                                                                                                                                     |
| <i>Avena sativa</i> agg.     | Poaceae          | s pop | KN   | Hafer     | syst. SKE | p. 468             | Mischungen . . . die auf gichtisch-rheumatische Krankheitszustände günstig wirken                                                                                                                   |
| <i>Avena sativa</i> agg.     | Poaceae          | s pop | KN   | Hafer     | syst. TON | p. 467             | Blut brauchen                                                                                                                                                                                       |
| <i>Avena sativa</i> agg.     | Poaceae          | s pop | KN   | Hafer     | top. URO  | p. 411             | Nieren-, Blasen und Steinleiden                                                                                                                                                                     |
| <i>Avena sativa</i> agg.     | Poaceae          | s pop | UB   | Hafer     | syst. CAR | p. 400             | Arteriosklerose Vorbeugung                                                                                                                                                                          |
| <i>Avena sativa</i> agg.     | Poaceae          | s pop | UB   | Hafer     | syst. NER | p. 420             | Schlafstörungen, Nervosität und Unruhe                                                                                                                                                              |
| <i>Avena sativa</i> agg.     | Poaceae          | s pop | WI   | Hafer     | top. GAS  | p. 93              | Volksmedizin: Lebererkrankungen                                                                                                                                                                     |
| <i>Avena sativa</i> agg.     | Poaceae          | s pop | WI   | Hafer     | syst. NER | p. 93              | Volksmedizin: nervöser Erschöpfung, Schlaflosigkeit und sog.                                                                                                                                        |
| <i>Avena sativa</i> agg.     | Poaceae          | s pop | WI   | Hafer     | syst. NER | p. 93              | Volksmedizin: nervöser Erschöpfung, Schlaflosigkeit und sog.                                                                                                                                        |
| <i>Avena sativa</i> agg.     | Poaceae          | s pop | WI   | Hafer     | top. NER  | p. 93              | Volksmedizin: Sedativum bei Hypertonikern                                                                                                                                                           |
| <i>Avena sativa</i> agg.     | Poaceae          | s pop | WI   | Hafer     | syst. SKE | p. 93              | Volksmedizin: Kneipp - Aduvans bei Rheuma und Gicht                                                                                                                                                 |
| <i>Avena sativa</i> agg.     | Poaceae          | s pop | WI   | Hafer     | top. SKE  | p. 93              | Volksmedizin: Kneipp - Aduvans bei Rheuma und Gicht                                                                                                                                                 |
| <i>Avena sativa</i> agg.     | Poaceae          | s pop | WI   | Hafer     | syst. TON | p. 93              | Volksmedizin: Roborantium in der Rekonvaleszenz                                                                                                                                                     |
| <i>Avena sativa</i> agg.     | Poaceae          | sci   | EMA  | Hafer     | top. DER  | IMPC/368600/2007   | healing of minor wounds                                                                                                                                                                             |
| <i>Avena sativa</i> agg.     | Poaceae          | sci   | EMA  | Hafer     | top. DER  | IMPC/368600/2007   | healing of minor wounds                                                                                                                                                                             |
| <i>Avena sativa</i> agg.     | Poaceae          | sci   | EMA  | Hafer     | top. DER  | IMPC/368600/2007   | healing of minor wounds                                                                                                                                                                             |
| <i>Beta vulgaris</i> L.      | Chenopodiaceae   | ant   | DIOS | Rote Bete | top. DER  | 145                | roseartige Entzündungen                                                                                                                                                                             |
| <i>Beta vulgaris</i> L.      | Chenopodiaceae   | ant   | DIOS | Rote Bete | top. DER  | 145                | vertreibt Schorff [und Nisse]                                                                                                                                                                       |
| <i>Beta vulgaris</i> L.      | Chenopodiaceae   | ant   | DIOS | Rote Bete | vol. DER  | 145                | Frostbeulen                                                                                                                                                                                         |
| <i>Beta vulgaris</i> L.      | Chenopodiaceae   | ant   | DIOS | Rote Bete | top. EAR  | 145                | hilft auch bei Ohrenschmerzen                                                                                                                                                                       |
| <i>Beta vulgaris</i> L.      | Chenopodiaceae   | ant   | DIOS | Rote Bete | syst. GAS | 216                | bei Dysenterie und Magenleiden zu helfen                                                                                                                                                            |
| <i>Beta vulgaris</i> L.      | Chenopodiaceae   | ant   | DIOS | Rote Bete | syst. GYN | 216                | den rothen Fluss der Frauen zu stellen                                                                                                                                                              |
| <i>Beta vulgaris</i> L.      | Chenopodiaceae   | ant   | DIOS | Rote Bete | top. HUM  | 145                | reinigt ihr Saft den Kopf, wenn er mit Honig in die Nase injiziert wird                                                                                                                             |
| <i>Beta vulgaris</i> L.      | Chenopodiaceae   | ant   | DIOS | Rote Bete | top. OTH  | 145                | vertreibt [Schorff] und Nisse                                                                                                                                                                       |
| <i>Beta vulgaris</i> L.      | Chenopodiaceae   | mon   | LO   | Rüben     | n.d., OTH | n.d., n.d.         |                                                                                                                                                                                                     |
| <i>Beta vulgaris</i> L.      | Chenopodiaceae   | ren   | LF   | Rüben     | syst. ANT | CXX / LXXVII       | gut wider allerley gift                                                                                                                                                                             |
| <i>Beta vulgaris</i> L.      | Chenopodiaceae   | ren   | LF   | Rüben     | syst. APH | CXX / LXXVII       | bringt lust zur unkeuscheyt                                                                                                                                                                         |
| <i>Beta vulgaris</i> L.      | Chenopodiaceae   | ren   | LF   | Rüben     | top. DER  | CXX / LXXVII       | seubern sie das angesicht und den ganzen leib                                                                                                                                                       |
| <i>Beta vulgaris</i> L.      | Chenopodiaceae   | ren   | LF   | Rüben     | syst. EYE | CXX / LXXVII       | lautere Augen                                                                                                                                                                                       |
| <i>Beta vulgaris</i> L.      | Chenopodiaceae   | ren   | LF   | Rüben     | syst. GAS | CXX / LXXVII       | bringen lust zu essen                                                                                                                                                                               |
| <i>Beta vulgaris</i> L.      | Chenopodiaceae   | ren   | LF   | Rüben     | top. SKE  | CXX / LXXVII       | kalte podagra                                                                                                                                                                                       |



|                                     |                |       |       |                    |           |                    |                                                                                                                                                                       |
|-------------------------------------|----------------|-------|-------|--------------------|-----------|--------------------|-----------------------------------------------------------------------------------------------------------------------------------------------------------------------|
| <i>Beta vulgaris</i> L.             | Chenopodiaceae | ren   | LF    | Rüben              | svst. URO | COX / LXXVII       | treiben den Harn                                                                                                                                                      |
| <i>Beta vulgaris</i> L.             | Chenopodiaceae | s pop | AV    | Randen             | svst. DER | p. 224             | Kropf                                                                                                                                                                 |
| <i>Beta vulgaris</i> L.             | Chenopodiaceae | s pop | AV    | Randen             | syst. FEV | p. 108             | Grippe, Fieber                                                                                                                                                        |
| <i>Beta vulgaris</i> L.             | Chenopodiaceae | s pop | AV    | Randen             | syst. GAS | p. 306, 318        | Blinddarmentzündung, Dysbakterie, Störungen der Leber und Gallewege                                                                                                   |
| <i>Beta vulgaris</i> L.             | Chenopodiaceae | s pop | AV    | Randen             | syst. OTH | p. 176             | Lymphgranulomatöse Hodgkinsche Krankheit                                                                                                                              |
| <i>Beta vulgaris</i> L.             | Chenopodiaceae | s pop | AV    | Randen             | syst. OTH | p. 291             | Drüsentätigkeit, Übergewichtsvermeidung                                                                                                                               |
| <i>Beta vulgaris</i> L.             | Chenopodiaceae | s pop | AV    | Randen             | syst. RES | p. 156             | Erkrankung der Atmungsorgane                                                                                                                                          |
| <i>Beta vulgaris</i> L.             | Chenopodiaceae | s pop | JK    | Rote Bete          | syst. TON | p. 404             | blutarme, skrofulöse und sonst schwächliche Kinder                                                                                                                    |
| <i>Cannabis sativa</i> L.           | Cannabaceae    | ant   | DIOS  | Hanf               | syst. APH | 209                | reichlich genossen, die Zeugung vernichtet<br>Grün zu Saft verarbeitet und eingeträufelt ist sie ein gutes Mittel                                                     |
| <i>Cannabis sativa</i> L.           | Cannabaceae    | ant   | DIOS  | Hanf               | top. EAR  | 209                | gegen Ohrenleiden<br>und er ist für gesunde Menschen heilsam zu essen, und in ihrem Magen ist er leicht und nützlich, si dass er den Schleim                          |
| <i>Cannabis sativa</i> L.           | Cannabaceae    | mon   | HvB   | Hanf               | syst. GAS | 1-11               | eingemassen aus dem Magen wegschafft,                                                                                                                                 |
| <i>Cannabis sativa</i> L.           | Cannabaceae    | mon   | HvB   | Hanf               | top. GAS  | 1-11               | wer einen kalten Magen hat                                                                                                                                            |
| <i>Cannabis sativa</i> L.           | Cannabaceae    | ren   | LF    | Hanf               | syst. APH | COXX / CLXVIII     | trücket und tilget aus den menschlichen Samen                                                                                                                         |
| <i>Cannabis sativa</i> L.           | Cannabaceae    | ren   | LF    | Hanf               | top. DER  | COXX / CLXVIII     | lindert und zerzetet die geschwulst                                                                                                                                   |
| <i>Cannabis sativa</i> L.           | Cannabaceae    | ren   | LF    | Hanf               | top. DER  | COXX / CLXVIII     | gut zu dem brand                                                                                                                                                      |
| <i>Cannabis sativa</i> L.           | Cannabaceae    | ren   | LF    | Hanf               | top. EAR  | COXX / CLXVIII     | legt den schmerz derselben [ohren]                                                                                                                                    |
| <i>Cannabis sativa</i> L.           | Cannabaceae    | ren   | LF    | Hanf               | syst. GAS | COXX / CLXVIII     | vertreibt die bläst und wind im leib                                                                                                                                  |
| <i>Cannabis sativa</i> L.           | Cannabaceae    | ren   | LF    | Hanf               | top. SKE  | COXX / CLXVIII     | gut zu dem podagra                                                                                                                                                    |
| <i>Cannabis sativa</i> L.           | Cannabaceae    | ren   | LF    | Hanf               | top. SKE  | COXX / CLXVIII     | erweicht die zusammen gezogne gleich                                                                                                                                  |
| <i>Cannabis sativa</i> L.           | Cannabaceae    | s pop | UB    | Hanf               | syst. NER | p. 427             | depressiver Verstimmung                                                                                                                                               |
| <i>Capsella bursa-pastoris</i> agg. | Brassicaceae   | ant   | DIOS  | Hirtentäschchen    | syst. GYN | 154                | befördert die Katamenien und tötet die<br>Der Same ist scharf, erwärmend er führt die Galle nach oben und unten ab; Genossen führt er auch das Blut ab und öffnet die |
| <i>Capsella bursa-pastoris</i> agg. | Brassicaceae   | ant   | DIOS  | Hirtentäschchen    | syst. HUM | 154                | innerlichen Abszesse                                                                                                                                                  |
| <i>Capsella bursa-pastoris</i> agg. | Brassicaceae   | ant   | DIOS  | Hirtentäschchen    | top. SKE  | 154                | Ischiasschmerz                                                                                                                                                        |
| <i>Capsella bursa-pastoris</i> agg. | Brassicaceae   | mon   | LO    | Hirtentäschel      | n.d., OTH | n.d., n.d.         |                                                                                                                                                                       |
| <i>Capsella bursa-pastoris</i> agg. | Brassicaceae   | ren   | LF    | Hirtentäschel      | top. DER  | CCXXVII / CCXXXIII | kület die hitzige geschwulst, rotlauff                                                                                                                                |
| <i>Capsella bursa-pastoris</i> agg. | Brassicaceae   | ren   | LF    | Hirtentäschel      | top. DER  | CCXXVII / CCXXXIII | frische Wunden, Nasenbluten                                                                                                                                           |
| <i>Capsella bursa-pastoris</i> agg. | Brassicaceae   | ren   | LF    | Hirtentäschel      | syst. GAS | CCXXVII / CCXXXIII | rote Ruhr, Blutspießen                                                                                                                                                |
| <i>Capsella bursa-pastoris</i> agg. | Brassicaceae   | ren   | LF    | Hirtentäschel      | top. GAS  | CCXXVII / CCXXXIII | Magen entzündet ist                                                                                                                                                   |
| <i>Capsella bursa-pastoris</i> agg. | Brassicaceae   | ren   | LF    | Hirtentäschel      | syst. GYN | CCXXVII / CCXXXIII | den Weibern so zuviel fließen                                                                                                                                         |
| <i>Capsella bursa-pastoris</i> agg. | Brassicaceae   | s pop | AV    | Hirtentäschel      | syst. CAR | p. 214             | Hämorrhoidalblutung                                                                                                                                                   |
| <i>Capsella bursa-pastoris</i> agg. | Brassicaceae   | s pop | AV    | Hirtentäschel      | syst. GYN | p. 240             | Periodenstörung                                                                                                                                                       |
| <i>Capsella bursa-pastoris</i> agg. | Brassicaceae   | s pop | BVA   | Hirtentäschchen    | syst. DER | p. 92              | Nasenbluten, blutende Hämorrhoiden                                                                                                                                    |
| <i>Capsella bursa-pastoris</i> agg. | Brassicaceae   | s pop | BVA   | Hirtentäschchen    | syst. DER | p. 92              | Nasenbluten, blutende Hämorrhoiden                                                                                                                                    |
| <i>Capsella bursa-pastoris</i> agg. | Brassicaceae   | s pop | BVA   | Hirtentäschchen    | top. DER  | p. 92              | Blutungen bei Verletzungen stillen                                                                                                                                    |
| <i>Capsella bursa-pastoris</i> agg. | Brassicaceae   | s pop | BVA   | Hirtentäschchen    | syst. GAS | p. 92              | erschlafte Dampferistatik                                                                                                                                             |
| <i>Capsella bursa-pastoris</i> agg. | Brassicaceae   | s pop | BVA   | Hirtentäschchen    | syst. GAS | p. 92              | erschlafte Dampferistatik                                                                                                                                             |
| <i>Capsella bursa-pastoris</i> agg. | Brassicaceae   | s pop | BVA   | Hirtentäschchen    | syst. GYN | p. 92              | starke Menstruationsblutung, Wechseljahrsbeschwerden, Gebärmutterblutung                                                                                              |
| <i>Capsella bursa-pastoris</i> agg. | Brassicaceae   | s pop | BVA   | Hirtentäschchen    | syst. GYN | p. 92              | starke Menstruationsblutung, Wechseljahrsbeschwerden, Gebärmutterblutung                                                                                              |
| <i>Capsella bursa-pastoris</i> agg. | Brassicaceae   | s pop | BVA   | Hirtentäschchen    | syst. TEE | p. 92              | Zahnblutungen                                                                                                                                                         |
| <i>Capsella bursa-pastoris</i> agg. | Brassicaceae   | s pop | BVA   | Hirtentäschchen    | syst. TEE | p. 92              | Zahnblutungen                                                                                                                                                         |
| <i>Capsella bursa-pastoris</i> agg. | Brassicaceae   | s pop | JK    | Hirtentäschel      | top. DER  | p. 373             | Verletzungen wo Blut fließt                                                                                                                                           |
| <i>Capsella bursa-pastoris</i> agg. | Brassicaceae   | s pop | JK    | Hirtentäschel      | syst. GAS | p. 373             | Blutspießen, Durchfall und inneren Brand                                                                                                                              |
| <i>Capsella bursa-pastoris</i> agg. | Brassicaceae   | s pop | JK    | Hirtentäschel      | syst. GYN | p. 373             | Geschlechtstrieb zu dämpfen                                                                                                                                           |
| <i>Capsella bursa-pastoris</i> agg. | Brassicaceae   | s pop | JK    | Hirtentäschel      | syst. URO | p. 373             | Blut im Urin                                                                                                                                                          |
| <i>Capsella bursa-pastoris</i> agg. | Brassicaceae   | s pop | MT    | Hirtentäschel      | syst. CAR | p. 21              | zu hartem zu hartem Blutdruck                                                                                                                                         |
| <i>Capsella bursa-pastoris</i> agg. | Brassicaceae   | s pop | MT    | Hirtentäschel      | syst. DER | p. 21              | blutenden Hämorrhoiden                                                                                                                                                |
| <i>Capsella bursa-pastoris</i> agg. | Brassicaceae   | s pop | MT    | Hirtentäschel      | syst. GYN |                    | starken Menstruationsblutungen, Pubertätszeit, Wechseljahre,                                                                                                          |
| <i>Capsella bursa-pastoris</i> agg. | Brassicaceae   | s pop | MT    | Hirtentäschel      | top. SKE  | p. 21              | geschwollene Brüsten während des Stillens, Gebärmutterblutungen                                                                                                       |
| <i>Capsella bursa-pastoris</i> agg. | Brassicaceae   | s pop | UB    | Hirtentäschel      | top. DER  | p. 303             | Wundbehandlung                                                                                                                                                        |
| <i>Capsella bursa-pastoris</i> agg. | Brassicaceae   | s pop | UB    | Hirtentäschel      | top. DER  | p. 303             | Wundbehandlung                                                                                                                                                        |
| <i>Capsella bursa-pastoris</i> agg. | Brassicaceae   | s pop | WI    | Hirtentäschelkraut | syst. GYN | p. 114             | Volksmedizin: blutstillendes Mittel, übermässige Monatsblutung                                                                                                        |
| <i>Capsella bursa-pastoris</i> agg. | Brassicaceae   | sci   | EMA   | Hirtentäschel      | syst. GYN | /HPMC/26766/2010   | reduction of heavy menstrual bleeding in women with regular cycles                                                                                                    |
| <i>Capsella bursa-pastoris</i> agg. | Brassicaceae   | sci   | WI    | Hirtentäschelkraut | syst. OTH | p. 114             | hämolytische Wirkung                                                                                                                                                  |
| <i>Carum carvi</i> L.               | Apiaceae       | ant   | DIOS  | Kümmel             | syst. ANT | 184                | wird auch vorteilhaft den Gegenmitteln<br>gut für den Magen und angenehm für den Mund, er befördert die                                                               |
| <i>Carum carvi</i> L.               | Apiaceae       | ant   | DIOS  | Kümmel             | syst. GAS | 184                | Verdauung                                                                                                                                                             |
| <i>Carum carvi</i> L.               | Apiaceae       | ant   | DIOS  | Kümmel             | syst. OTH | 184                | Die gekochte Wurzel wird gegessen wie die Möhre                                                                                                                       |
| <i>Carum carvi</i> L.               | Apiaceae       | ant   | DIOS  | Kümmel             | syst. URO | 184                | harntreibend                                                                                                                                                          |
| <i>Carum carvi</i> L.               | Apiaceae       | mon   | HvB   | Kümmel             | syst. GAS | 1-17               | Mensch, der gekochter und gebratener käse essen will<br>ist dem Magen und dem Mund ganz dienstlich, vertreibt die Bläst                                               |
| <i>Carum carvi</i> L.               | Apiaceae       | ren   | LF    | Wiesenkümmel       | syst. GAS | CCXXII / CL        | und wind                                                                                                                                                              |
| <i>Carum carvi</i> L.               | Apiaceae       | ren   | LF    | Wiesenkümmel       | syst. GAS | CCXXII / CL        | dem Magen                                                                                                                                                             |
| <i>Carum carvi</i> L.               | Apiaceae       | ren   | LF    | Wiesenkümmel       | syst. URO | CCXXII / CL        | treibt den Harn                                                                                                                                                       |
| <i>Carum carvi</i> L.               | Apiaceae       | ren   | LF    | Wiesenkümmel       | syst. URO | CCXXII / CL        | treibt den Harn                                                                                                                                                       |
| <i>Carum carvi</i> L.               | Apiaceae       | s pop | BVA   | Kümmel             | syst. GAS | p. 128             | Kleinkinder                                                                                                                                                           |
| <i>Carum carvi</i> L.               | Apiaceae       | s pop | BVA   | Kümmel             | syst. GAS | p. 128             | Kleinkinder                                                                                                                                                           |
| <i>Carum carvi</i> L.               | Apiaceae       | s pop | BVA   | Kümmel             | syst. GYN | p. 128             | Milchbildung der Wöchnerinnen, Gebärmutterkrämpfen                                                                                                                    |
| <i>Carum carvi</i> L.               | Apiaceae       | s pop | BVA   | Kümmel             | syst. GYN | p. 128             | Milchbildung der Wöchnerinnen, Gebärmutterkrämpfen<br>und gegen Schwindelanfälle, die nicht durch Verstopfung                                                         |
| <i>Carum carvi</i> L.               | Apiaceae       | s pop | JK    | Kümmel             | syst. CAR | p. 385             | hervorgeufen werden                                                                                                                                                   |
| <i>Carum carvi</i> L.               | Apiaceae       | s pop | JK    | Kümmel             | syst. GAS | p. 385             | Bauchschmerzen                                                                                                                                                        |
| <i>Carum carvi</i> L.               | Apiaceae       | s pop | JK    | Kümmel             | syst. GAS | p. 385             | verhindert Blähungen und Leibeskrämpfe                                                                                                                                |
| <i>Carum carvi</i> L.               | Apiaceae       | s pop | JK    | Kümmel             | syst. GAS | p. 385             | stilt das Abweichen und vertreibt Würmer                                                                                                                              |
| <i>Carum carvi</i> L.               | Apiaceae       | s pop | JK    | Kümmel             | syst. RES | p. 385             | Hustengetränk für Kinder                                                                                                                                              |
| <i>Carum carvi</i> L.               | Apiaceae       | s pop | JK    | Kümmel             | syst. URO | p. 385             | beim Urinieren Beschwerden oder an Hämorrhoiden leiden<br>Begünstigt Beginn und Verlauf der Periode, wirkt bei der Geburt                                             |
| <i>Carum carvi</i> L.               | Apiaceae       | s pop | KN    | Kümmel             | syst. GYN | p. 476             | wehenanregend und erleichtert den Geburtsvorgang                                                                                                                      |
| <i>Carum carvi</i> L.               | Apiaceae       | s pop | KN    | Kümmel             | syst. URO | p. 476             | Wasserausscheidung der Nieren begünstigt                                                                                                                              |
| <i>Carum carvi</i> L.               | Apiaceae       | s pop | UB    | Kümmel             | syst. GAS | p. 115             | blähungstreibend                                                                                                                                                      |
| <i>Carum carvi</i> L.               | Apiaceae       | s pop | UB    | Kümmel             | top. GAS  | p. 115             | blähungstreibend                                                                                                                                                      |
| <i>Carum carvi</i> L.               | Apiaceae       | s pop | WI    | Kümmel             | top. DER  | p. 135             | Volksmedizin: Mundwässer                                                                                                                                              |
| <i>Carum carvi</i> L.               | Apiaceae       | s pop | WI    | Kümmel             | top. HUM  | p. 135             | Volksmedizin: hautreizende Einreibungen                                                                                                                               |
| <i>Carum carvi</i> L.               | Apiaceae       | sci   | ESCOP | Carvi fructus      | syst. GAS | p. 64              | spasmodic gastro-intestinal complaints, flatulence, bloating                                                                                                          |
| <i>Carum carvi</i> L.               | Apiaceae       | sci   | WI    | Kümmel             | syst. GAS | p. 135             | Verdauungsbeschwerden                                                                                                                                                 |
| <i>Carum carvi</i> L.               | Apiaceae       | sci   | WI    | Kümmel             | syst. GAS | p. 135             | Verdauungsbeschwerden                                                                                                                                                 |
| <i>Chelidonium majus</i> L.         | Papaveraceae   | ant   | DIOS  | Schöllkraut        | top. DER  | 163                | und mit Wein als Umschlag Bläsenausschlag<br>Der mit Honig gemischte und in                                                                                           |
| <i>Chelidonium majus</i> L.         | Papaveraceae   | ant   | DIOS  | Schöllkraut        | top. EYE  | 163                | Schärfe des Gesichtes                                                                                                                                                 |
| <i>Chelidonium majus</i> L.         | Papaveraceae   | ant   | DIOS  | Schöllkraut        | top. GAS  | 163                | Die Wurzel mit Anis und Weißwein getrunken heilt die Gelbsucht<br>Unreines isst oder trinkt oder berührt, wovon er geschwung im                                       |
| <i>Chelidonium majus</i> L.         | Papaveraceae   | mon   | HvB   | Schöllkraut        | top. DER  | 1-138              | Körper wird                                                                                                                                                           |
| <i>Chelidonium majus</i> L.         | Papaveraceae   | mon   | MF    | Schöllkraut        | top. DER  | 52                 | Male auf der Haut beseitigen                                                                                                                                          |
| <i>Chelidonium majus</i> L.         | Papaveraceae   | mon   | MF    | Schöllkraut        | top. EYE  | 52                 | trübe Augen heilsichtig zu machen                                                                                                                                     |
| <i>Chelidonium majus</i> L.         | Papaveraceae   | mon   | MF    | Schöllkraut        | syst. GAS | 52                 | gegen Gelbsucht                                                                                                                                                       |
| <i>Chelidonium majus</i> L.         | Papaveraceae   | mon   | MF    | Schöllkraut        | top. TEE  | 52                 | halt jeden Zahnschmerz fern                                                                                                                                           |
| <i>Chelidonium majus</i> L.         | Papaveraceae   | ren   | LF    | Schöllkraut        | top. DER  | CCXXVI / CCXXXIII  | in die wunden von schaden gethon                                                                                                                                      |
| <i>Chelidonium majus</i> L.         | Papaveraceae   | ren   | LF    | Schöllkraut        | top. DER  | CCXXVI / CCXXXIII  | heylet fisteln, krebs und den woff damit geschaeschen                                                                                                                 |

|                                 |               |       |      |                |      |      |                    |                                                                             |
|---------------------------------|---------------|-------|------|----------------|------|------|--------------------|-----------------------------------------------------------------------------|
| <i>Chelidonium majus</i> L.     | Papaveraceae  | ren   | LF   | Schöllkraut    | top  | EYE  | CCXXVI / CCXXXIII  | macht klar augen, darin gestopft                                            |
| <i>Chelidonium majus</i> L.     | Papaveraceae  | ren   | LF   | Schöllkraut    | synt | GAS  | CCXXVI / CCXXXIII  | eröffnet die verstopfung der leber und vertreibt die gelbsucht              |
| <i>Chelidonium majus</i> L.     | Papaveraceae  | s pop | JK   | Schöllkraut    | top  | CAR  |                    | p. 418 zieht Blutandrang vom Kopf hinunter (Ch. In den Schuhen)             |
| <i>Chelidonium majus</i> L.     | Papaveraceae  | s pop | JK   | Schöllkraut    | synt | DER  |                    | p. 418 Hautunreinigkeiten                                                   |
| <i>Chelidonium majus</i> L.     | Papaveraceae  | s pop | JK   | Schöllkraut    | top  | DER  |                    | p. 418 Warzen                                                               |
| <i>Chelidonium majus</i> L.     | Papaveraceae  | s pop | JK   | Schöllkraut    | top  | DER  |                    | nehmen dem Kropf das Wachstum, bringen verunstaltende                       |
| <i>Chelidonium majus</i> L.     | Papaveraceae  | s pop | JK   | Schöllkraut    | top  | DER  |                    | p. 418 Barthaare zum Verschwinden                                           |
| <i>Chelidonium majus</i> L.     | Papaveraceae  | s pop | JK   | Schöllkraut    | synt | EYE  |                    | p. 418 Augenschwäche                                                        |
| <i>Chelidonium majus</i> L.     | Papaveraceae  | s pop | JK   | Schöllkraut    | top  | EYE  |                    | p. 418 Augenleiden, die aus Verstopfung hervorgehen                         |
| <i>Chelidonium majus</i> L.     | Papaveraceae  | s pop | JK   | Schöllkraut    | synt | GAS  |                    | p. 418 Gelbsucht                                                            |
| <i>Chelidonium majus</i> L.     | Papaveraceae  | s pop | JK   | Schöllkraut    | top  | NER  |                    | p. 418 Zittern in den Gliedern                                              |
| <i>Chelidonium majus</i> L.     | Papaveraceae  | s pop | JK   | Schöllkraut    | top  | SKE  |                    | p. 418 Knoten von Gicht und Rheumatismus                                    |
| <i>Chelidonium majus</i> L.     | Papaveraceae  | s pop | JK   | Schöllkraut    | top  | TEE  |                    | p. 418 Zahn                                                                 |
| <i>Chelidonium majus</i> L.     | Papaveraceae  | s pop | JK   | Schöllkraut    | synt | URO  |                    | p. 418 Wassersucht                                                          |
| <i>Chelidonium majus</i> L.     | Papaveraceae  | s pop | UB   | Schöllkraut    | synt | GAS  |                    | p. 185 Gallestörungen                                                       |
| <i>Chelidonium majus</i> L.     | Papaveraceae  | s pop | UB   | Schöllkraut    | synt | GAS  |                    | p. 185 Gallestörungen                                                       |
| <i>Chelidonium majus</i> L.     | Papaveraceae  | s pop | UB   | Schöllkraut    | synt | GAS  |                    | Ausleitung und Regeneration, Heilpflanzen zur Aktivierung der               |
| <i>Chelidonium majus</i> L.     | Papaveraceae  | s pop | UB   | Schöllkraut    | synt | GAS  |                    | p. 459 Ausscheidung                                                         |
| <i>Chelidonium majus</i> L.     | Papaveraceae  | s pop | WI   | Schöllkraut    | top  | DER  |                    | p. 149 Volksmedizin: Warzen                                                 |
| <i>Cichorium intybus</i> L.     | Asteraceae    | ant   | DIOS | Wegwarte       | top  | ANT  |                    | 148 als Umschlag leisten gegen Skorpionsbiss Hilfe                          |
| <i>Cichorium intybus</i> L.     | Asteraceae    | ant   | DIOS | Wegwarte       | top  | CAR  |                    | 148 mit Grütze [für sich allein als Umschlag] sind sie von guter Wirkung    |
| <i>Cichorium intybus</i> L.     | Asteraceae    | ant   | DIOS | Wegwarte       | top  | CAR  |                    | 148 bei Herzleiden                                                          |
| <i>Cichorium intybus</i> L.     | Asteraceae    | ant   | DIOS | Wegwarte       | top  | CAR  |                    | 148 für sich allein als Umschlag sind sie von guter Wirkung bei Herzleiden  |
| <i>Cichorium intybus</i> L.     | Asteraceae    | ant   | DIOS | Wegwarte       | top  | DER  |                    | 148 heilen mit Graupen zusammen die Rose; mit Bleiweiß und Essig            |
| <i>Cichorium intybus</i> L.     | Asteraceae    | ant   | DIOS | Wegwarte       | top  | EYE  |                    | 148 dient ihr Saft als Salbe in Fällen, welche Abkühlung erheischen         |
| <i>Cichorium intybus</i> L.     | Asteraceae    | ant   | DIOS | Wegwarte       | top  | EYE  |                    | 148 Augenentzündungen                                                       |
| <i>Cichorium intybus</i> L.     | Asteraceae    | ant   | DIOS | Wegwarte       | synt | GAS  |                    | gut für den Magen. Gekocht stellen sie den Durchfall, wenn sie mit          |
| <i>Cichorium intybus</i> L.     | Asteraceae    | ant   | DIOS | Wegwarte       | synt | GAS  |                    | 148 Essig genommen werden                                                   |
| <i>Cichorium intybus</i> L.     | Asteraceae    | ant   | DIOS | Wegwarte       | top  | SKE  |                    | 148 helfen bei Podagra                                                      |
| <i>Cichorium intybus</i> L.     | Asteraceae    | mon   | HvB  | Wegwarte       | synt | GAS  |                    | 1-60 keine rechte Verdauung                                                 |
| <i>Cichorium intybus</i> L.     | Asteraceae    | mon   | HvB  | Wegwarte       | synt | RES  |                    | 1-60 Brust und Stimme                                                       |
| <i>Cichorium intybus</i> L.     | Asteraceae    | ren   | LF   | Wegwarte       | top  | DER  | CLXXXVII / CCLXIII | rotlauffen                                                                  |
| <i>Cichorium intybus</i> L.     | Asteraceae    | ren   | LF   | Wegwarte       | top  | EYE  | CLXXXVII / CCLXIII | hitzigen Geschwulsten der Augen                                             |
| <i>Cichorium intybus</i> L.     | Asteraceae    | ren   | LF   | Wegwarte       | synt | GAS  | CLXXXVII / CCLXIII | stellen sie den stuhlgang                                                   |
| <i>Cichorium intybus</i> L.     | Asteraceae    | ren   | LF   | Wegwarte       | synt | GAS  | CLXXXVII / CCLXIII | lebersüchtigen gelbsucht                                                    |
| <i>Cichorium intybus</i> L.     | Asteraceae    | ren   | LF   | Wegwarte       | top  | GAS  | CLXXXVII / CCLXIII | weetaagen im Magenschlund                                                   |
| <i>Cichorium intybus</i> L.     | Asteraceae    | ren   | LF   | Wegwarte       | synt | GYN  | CLXXXVII / CCLXIII | bringen den frauen ihr zeit                                                 |
| <i>Cichorium intybus</i> L.     | Asteraceae    | ren   | LF   | Wegwarte       | synt | NER  | CLXXXVII / CCLXIII | machen ziemlich schlaffen                                                   |
| <i>Cichorium intybus</i> L.     | Asteraceae    | ren   | LF   | Wegwarte       | top  | NER  | CLXXXVII / CCLXIII | mildert den Schmerzen des Hauptes                                           |
| <i>Cichorium intybus</i> L.     | Asteraceae    | ren   | LF   | Wegwarte       | top  | SKE  | CLXXXVII / CCLXIII | hitzigen podagra                                                            |
| <i>Cichorium intybus</i> L.     | Asteraceae    | ren   | LF   | Wegwarte       | synt | URO  | CLXXXVII / CCLXIII | blasen                                                                      |
| <i>Cichorium intybus</i> L.     | Asteraceae    | s pop | JK   | Wegwarte       | top  | DER  |                    | p. 437 aussere Leiden des Unterleibs                                        |
| <i>Cichorium intybus</i> L.     | Asteraceae    | s pop | JK   | Wegwarte       | synt | FEV  |                    | p. 437 ist sehr gut bei Fieber                                              |
| <i>Cichorium intybus</i> L.     | Asteraceae    | s pop | JK   | Wegwarte       | synt | GAS  |                    | p. 437 gegen Würmer                                                         |
| <i>Cichorium intybus</i> L.     | Asteraceae    | s pop | JK   | Wegwarte       | synt | GAS  |                    | reinigen Magen, Leber; vertreiben überflüssige Galle, heilt Gelbsucht       |
| <i>Cichorium intybus</i> L.     | Asteraceae    | s pop | JK   | Wegwarte       | synt | GAS  |                    | p. 437 und stillt das Blutspeien                                            |
| <i>Cichorium intybus</i> L.     | Asteraceae    | s pop | JK   | Wegwarte       | synt | URO  |                    | p. 437 Nierensteine                                                         |
| <i>Cichorium intybus</i> L.     | Asteraceae    | s pop | JK   | Wegwarte       | synt | URO  |                    | p. 437 reinigen Nieren, treibt den Urin                                     |
| <i>Cichorium intybus</i> L.     | Asteraceae    | s pop | KN   | Wegwarte       | top  | DER  |                    | p. 491 schmerzlichen Entzündungen am Körper                                 |
| <i>Cichorium intybus</i> L.     | Asteraceae    | s pop | KN   | Wegwarte       | synt | GAS  |                    | p. 491 appetitanregend, drüsenanregend und leicht stuhlfördernd             |
| <i>Cichorium intybus</i> L.     | Asteraceae    | s pop | KN   | Wegwarte       | synt | GAS  |                    | Stauungen in Pfortader, Leber, Milz und Hämorrhoiden werden                 |
| <i>Cichorium intybus</i> L.     | Asteraceae    | s pop | KN   | Wegwarte       | synt | GAS  |                    | p. 491 günstig beeinflusst                                                  |
| <i>Cichorium intybus</i> L.     | Asteraceae    | s pop | KN   | Wegwarte       | top  | GAS  |                    | p. 491 Magendrücken                                                         |
| <i>Cichorium intybus</i> L.     | Asteraceae    | s pop | UB   | Wegwarte       | synt | GAS  |                    | p. 154 / 186 Amara tonica / simplex / pura, Magenkrankungen, Gallestörungen |
| <i>Cichorium intybus</i> L.     | Asteraceae    | s pop | UB   | Wegwarte       | synt | GAS  |                    | p. 154 / 186 Amara tonica / simplex / pura, Magenkrankungen, Gallestörungen |
| <i>Cichorium intybus</i> L.     | Asteraceae    | s pop | UB   | Wegwarte       | synt | GAS  |                    | p. 154 / 186 Amara tonica / simplex / pura, Magenkrankungen, Gallestörungen |
| <i>Cichorium intybus</i> L.     | Asteraceae    | s pop | UB   | Wegwarte       | synt | HUM  |                    | p. 461 Ausleitung und Regeneration; Heilpflanzen mit Gerbstoffen            |
| <i>Cichorium intybus</i> L.     | Asteraceae    | sci   | EMA  | Wegwarte       | synt | GAS  | IMPC/12181672010   | mild digestive disorders and temporary loss of appetite                     |
| <i>Clematis vitalba</i> L.      | Ranunculaceae | ant   | DIOS | Clematis       | top  | DER  |                    | 260 Blätter als Umschlag vertreiben Aussatz                                 |
| <i>Clematis vitalba</i> L.      | Ranunculaceae | ant   | DIOS | Clematis       | synt | HUM  |                    | 260 führt Schleim und Galle nach unten ab                                   |
| <i>Clematis vitalba</i> L.      | Ranunculaceae | mon   | LO   | Waldrebe       | n.d. | OTH  |                    | n.d. n.d.                                                                   |
| <i>Clematis vitalba</i> L.      | Ranunculaceae | ren   | LF   | Waldrebe       | synt | GYN  |                    | LII / XXIII bringen den frauen ihr bloodigkeit                              |
| <i>Clematis vitalba</i> L.      | Ranunculaceae | ren   | LF   | Waldrebe       | synt | n.d. |                    | LII / XXIII gleiche Wirkung wie Stickwurz?el                                |
| <i>Clematis vitalba</i> L.      | Ranunculaceae | ren   | LF   | Waldrebe       | synt | n.d. |                    | so den fallenden Siechtagen haben, den Schwindel und in den                 |
| <i>Clematis vitalba</i> L.      | Ranunculaceae | ren   | LF   | Waldrebe       | synt | NER  |                    | LII / XXIII Gliedern erlahmen                                               |
| <i>Clematis vitalba</i> L.      | Ranunculaceae | ren   | LF   | Waldrebe       | synt | OTH  |                    | LII / XXIII machen auch das Milz klein                                      |
| <i>Clematis vitalba</i> L.      | Ranunculaceae | ren   | LF   | Waldrebe       | synt | URO  |                    | LII / XXIII treiben den Harn                                                |
| <i>Clematis vitalba</i> L.      | Ranunculaceae | s pop | VAL  | Waldrebe       | top  | SKE  |                    | p. 229 douleurs rhumatismales, névralgies, névrites, cellulalgies           |
| <i>Colchicum autumnale</i> agg. | Liliaceae     | ant   | DIOS | Herbstzeitlose | synt | OTH  |                    | p. 235 Genossen tödtet sie durch Erstickung ähnlich wie die Pilze           |
| <i>Colchicum autumnale</i> agg. | Liliaceae     | mon   | HvB  | Herbstzeitlose | synt | OTH  |                    | Die Herbstzeitlose ist kalt und trocken, und in ihr ist weder Heil          |
| <i>Colchicum autumnale</i> agg. | Liliaceae     | ren   | LF   | Herbstzeitlose | top  | OTH  |                    | noch Gesundheit, und sie taugt keinem Menschen zum Essen,                   |
| <i>Colchicum autumnale</i> agg. | Liliaceae     | ren   | LF   | Herbstzeitlose | top  | OTH  |                    | 1-46 denn wenn er sie ässe                                                  |
| <i>Colchicum autumnale</i> agg. | Liliaceae     | ren   | LF   | Herbstzeitlose | synt | OTH  |                    | CII / CXXXIII allerley leuss damit zu vertreiben                            |
| <i>Colchicum autumnale</i> agg. | Liliaceae     | s pop | UB   | Herbstzeitlose | synt | OTH  |                    | wurzel von Zeitlosen gegessen toetod; einer aber unwissend                  |
| <i>Colchicum autumnale</i> agg. | Liliaceae     | s pop | UB   | Herbstzeitlose | synt | SKE  |                    | CII / CXXXIII gegessen kue milch zu trinken geben                           |
| <i>Conium maculatum</i> L.      | Apiaceae      | ant   | DIOS | Schierling     | top  | DER  |                    | p. 285 Gicht                                                                |
| <i>Conium maculatum</i> L.      | Apiaceae      | ant   | DIOS | Schierling     | top  | DER  |                    | 233 kriechende Geschwüre und Rose beseitigt er als Salbe                    |
| <i>Conium maculatum</i> L.      | Apiaceae      | ant   | DIOS | Schierling     | top  | EYE  |                    | ausgepresste Saft mit Wein gemischt vorthelhaft den                         |
| <i>Conium maculatum</i> L.      | Apiaceae      | ant   | DIOS | Schierling     | top  | GYN  |                    | 233 schmerzlindernden Kollyrien zutresetzt                                  |
| <i>Conium maculatum</i> L.      | Apiaceae      | ant   | DIOS | Schierling     | top  | GYN  |                    | Sie vertreiben ferner die Milch und verhindern ein Grösserwerden            |
| <i>Conium maculatum</i> L.      | Apiaceae      | ant   | DIOS | Schierling     | top  | OTH  |                    | 233 der jungfräulichen Brüste                                               |
| <i>Conium maculatum</i> L.      | Apiaceae      | ant   | DIOS | Schierling     | top  | OTH  |                    | Auch dieses gehört zu den vernichtenden Giften, indem es in Folge           |
| <i>Conium maculatum</i> L.      | Apiaceae      | ant   | DIOS | Schierling     | top  | OTH  |                    | 233 von Unterkühlung tödtet                                                 |
| <i>Conium maculatum</i> L.      | Apiaceae      | ant   | DIOS | Schierling     | top  | URO  |                    | Das Kraut und die Dolden, fein gestossen als Umschlag um die                |
| <i>Conium maculatum</i> L.      | Apiaceae      | ant   | DIOS | Schierling     | top  | URO  |                    | Hoden gelegt, helfen gegen Pollutionen, auch lassen sie als                 |
| <i>Conium maculatum</i> L.      | Apiaceae      | ant   | DIOS | Schierling     | top  | URO  |                    | Kataplasma die Genitalien erschaffen; lassen auch die Hoden der             |
| <i>Conium maculatum</i> L.      | Apiaceae      | ant   | DIOS | Schierling     | top  | URO  |                    | Knaben                                                                      |
| <i>Conium maculatum</i> L.      | Apiaceae      | ant   | DIOS | Schierling     | top  | URO  |                    | 233 verkümmern                                                              |
| <i>Conium maculatum</i> L.      | Apiaceae      | ant   | DIOS | Schierling     | top  | URO  |                    | der mit Knütteln und Stangen arg zerbläut ist, oder wer aus                 |
| <i>Conium maculatum</i> L.      | Apiaceae      | ant   | DIOS | Schierling     | top  | URO  |                    | irgendeiner Höhe gefallen ist, so dass sein Fleisch und die Glieder         |
| <i>Conium maculatum</i> L.      | Apiaceae      | mon   | HvB  | Schierling     | top  | SKE  |                    | 1-39 hart mitgenommen sind                                                  |
| <i>Conium maculatum</i> L.      | Apiaceae      | ren   | LF   | Schierling     | top  | DER  |                    | legung und linderung der Schmerzen zu külen alle hitzigen                   |
| <i>Conium maculatum</i> L.      | Apiaceae      | ren   | LF   | Schierling     | top  | DER  |                    | CCXXVIII / CLIII gebresten als ist der rotlauf                              |
| <i>Conium maculatum</i> L.      | Apiaceae      | ren   | LF   | Schierling     | top  | GYN  |                    | CCXXVIII / CLIII das er den seugenden Weibern die Milch vertreibt           |
| <i>Conium maculatum</i> L.      | Apiaceae      | s pop | VAL  | Schierling     | top  | NER  |                    | p. 227 calmant, analgesique, cataplasme résolutif et sédatif                |
| <i>Conium maculatum</i> L.      | Apiaceae      | s pop | VAL  | Schierling     | synt | NER  |                    | p. 227 raideurs musculaires (Parkinson), spasmes                            |
| <i>Conium maculatum</i> L.      | Apiaceae      | s pop | VAL  | Schierling     | synt | NER  |                    | p. 227 raideurs musculaires (Parkinson), spasmes                            |
| <i>Conium maculatum</i> L.      | Apiaceae      | s pop | VAL  | Schierling     | synt | NER  |                    | p. 227 raideurs musculaires (Parkinson), spasmes                            |
| <i>Convallaria</i> spp.         | Asparagaceae  | ant   | DIOS | Weisswurz      | top  | DER  |                    | p. 215 gutes Mittel für Wunden ist. Sie entfernt auch Flecken im Gesicht    |
| <i>Convallaria</i> spp.         | Asparagaceae  | ant   | DIOS | Ephemerum      | top  | DER  |                    | vertheilen Oedeme und Geschwülste, welche noch keine Flüssigkeit            |
| <i>Convallaria</i> spp.         | Asparagaceae  | ant   | DIOS | Ephemerum      | top  | DER  |                    | p. 235 enthalten                                                            |
| <i>Convallaria</i> spp.         | Asparagaceae  | ant   | DIOS | Ephemerum      | top  | TEE  |                    | p. 235 Mundspülwasser ein Mittel gegen Zahnschmerzen                        |
| <i>Convallaria</i> spp.         | Asparagaceae  | mon   | HvB  | Maiglöckchen   | synt | DER  |                    | 1-159 Skrofen, Ausschläge, irgendein Geschwür, in dem Gift ist              |
| <i>Convallaria</i> spp.         | Asparagaceae  | mon   | HvB  | Maiglöckchen   | synt | NER  |                    | 1-159 Epilepsie                                                             |
| <i>Convallaria</i> spp.         | Asparagaceae  | ren   | LF   | Maiglöckchen   | synt | CAR  |                    | COXXXIII / LXXXVIII ist krefftig zu sterken das herz, [hirm und leber]      |
| <i>Convallaria</i> spp.         | Asparagaceae  | ren   | LF   | Maiglöckchen   | synt | CAR  |                    | COXXXIII / LXXXVIII ist krefftig zu sterken das herz, hirm und leber        |
| <i>Convallaria</i> spp.         | Asparagaceae  | ren   | LF   | Maiglöckchen   | synt | CAR  |                    | zerteylen die geschwulsts darin sich das eyter noch nicht                   |
| <i>Convallaria</i> spp.         | Asparagaceae  | ren   | LF   | Maiglöckchen   | top  | DER  |                    | COXXXIII / LXXXVIII gesammelt hat                                           |
| <i>Convallaria</i> spp.         | Asparagaceae  | ren   | LF   | Maiglöckchen   | synt | DER  |                    | COXXXIII / LXXXVIII dem aussatz were                                        |
| <i>Convallaria</i> spp.         | Asparagaceae  | ren   | LF   | Maiglöckchen   | top  | DER  |                    | fürtrefftlich zu den Augen, dann er mach sie lauter und vertreibt die       |
| <i>Convallaria</i> spp.         | Asparagaceae  | ren   | LF   | Maiglöckchen   | top  | EYE  |                    | COXXXIII / LXXXVIII dunkelheyt derselbigen                                  |

|                              |               |       |       |                  |      |      |                       |                                                                                                                                                                                          |
|------------------------------|---------------|-------|-------|------------------|------|------|-----------------------|------------------------------------------------------------------------------------------------------------------------------------------------------------------------------------------|
| <i>Convallaria sep.</i>      | Asparagaceae  | ren   | LF    | Maijäckchen      | svst | NER  | CXXXIII / LXXXVIII    | ohnmacht, schwindel und fallende sucht                                                                                                                                                   |
| <i>Convallaria spp.</i>      | Asparagaceae  | ren   | LF    | Maijäckchen      | top  | TEE  | CXXXIII / LXXXVIII    | Wurzel gesotten und das wasser im mund gehalten vertreibt das                                                                                                                            |
| <i>Convallaria spp.</i>      | Asparagaceae  | s pop | UB    | Maijäckchen      | syst | CAR  | p. 383                | Herzglycoside 2. Ordnung                                                                                                                                                                 |
| <i>Coriandrum sativum</i> L. | Apiaceae      | ant   | DIOS  | Korander         | syst | APH  | 185                   | befördert die Samenbildung                                                                                                                                                               |
| <i>Coriandrum sativum</i> L. | Apiaceae      | ant   | DIOS  | Korander         | top  | DER  | 185                   | gutes Mittel gegen brennende Entzündungen auf der Haut                                                                                                                                   |
| <i>Coriandrum sativum</i> L. | Apiaceae      | ren   | LF    | Korander         | top  | DER  | 185                   | roseartige Entzündungen und kriechende Geschwüre. Mit Honig und Rosinen hilft es bei Epinyktiden, Hodenentzündungen und Karbunkeln; mit Schrot von Hülsenfrüchten zerteilt es Drüsen und |
| <i>Coriandrum sativum</i> L. | Apiaceae      | ant   | DIOS  | Korander         | top  | DER  | 185                   | Geschwülste                                                                                                                                                                              |
| <i>Coriandrum sativum</i> L. | Apiaceae      | ant   | DIOS  | Korander         | syst | GAS  | 185                   | treibt den Bandwurm aus                                                                                                                                                                  |
| <i>Coriandrum sativum</i> L. | Apiaceae      | ant   | DIOS  | Korander         | top  | OTH  | 185                   | Zu viel genommen greift es den Verstand gefährlich an;                                                                                                                                   |
| <i>Coriandrum sativum</i> L. | Apiaceae      | mon   | LO    | Korander         | n.d. | OTH  | n.d.                  | n.d.                                                                                                                                                                                     |
| <i>Coriandrum sativum</i> L. | Apiaceae      | ren   | LF    | Korander         | top  | DER  | CXCV / CXXX           | kuelt und leschet die hitzigen gebresten                                                                                                                                                 |
| <i>Coriandrum sativum</i> L. | Apiaceae      | ren   | LF    | Korander         | top  | DER  | CXCV / CXXX           | verzert der die kroepff und andere geschwulst                                                                                                                                            |
| <i>Coriandrum sativum</i> L. | Apiaceae      | ren   | LF    | Korander         | top  | DER  | CXCV / CXXX           | zerteylt und verzert er die hitzige geschwulst                                                                                                                                           |
| <i>Coriandrum sativum</i> L. | Apiaceae      | ren   | LF    | Korander         | svst | GAS  | CXCV / CXXX           | stellt den bauchfluss / er beschleusst auch den magen unnd behellt                                                                                                                       |
| <i>Coriandrum sativum</i> L. | Apiaceae      | ren   | LF    | Korander         | svst | GAS  | CXCV / CXXX           | die speiss darinn also lang bis sie gedewet und gekocht werden                                                                                                                           |
| <i>Coriandrum sativum</i> L. | Apiaceae      | ren   | LF    | Korander         | syst | GAS  | CXCV / CXXX           | tosdet die wurm und mehret den samen                                                                                                                                                     |
| <i>Coriandrum sativum</i> L. | Apiaceae      | ren   | LF    | Korander         | syst | GVN  | CXCV / CXXX           | ein frau die ire zeit zuvil hab .... So gestee der fluss ein tag                                                                                                                         |
| <i>Coriandrum sativum</i> L. | Apiaceae      | ren   | LF    | Korander         | n.d. | OTH  | CXCV / CXXX           | behelt dasselbige (Fleysch) den ganzen summer unversert                                                                                                                                  |
| <i>Coriandrum sativum</i> L. | Apiaceae      | s pop | UB    | Korander         | syst | GAS  | p. 183                | Gallenstörungen                                                                                                                                                                          |
| <i>Coriandrum sativum</i> L. | Apiaceae      | s pop | WI    | Korander         | svst | GAS  | p. 166                | Volksmedizin: gegen Würmer                                                                                                                                                               |
| <i>Coriandrum sativum</i> L. | Apiaceae      | s pop | WI    | Korander         | top  | SKE  | p. 166                | Volksmedizin: Einreibemittel gegen Rheuma und Gelenkschmerzen                                                                                                                            |
| <i>Coriandrum sativum</i> L. | Apiaceae      | sci   | WI    | Korander         | syst | GAS  | p. 166                | pflanzliches Magen-Darm-Mittel                                                                                                                                                           |
| <i>Coriandrum sativum</i> L. | Apiaceae      | sci   | WI    | Korander         | syst | GAS  | p. 166                | pflanzliches Magen-Darm-Mittel                                                                                                                                                           |
| <i>Corylus avellana</i> L.   | Betulaceae    | ant   | DIOS  | Haselnuss        | top  | DER  | 112                   | durch die Fuchskrankheit ausfallende Haar                                                                                                                                                |
| <i>Corylus avellana</i> L.   | Betulaceae    | ant   | DIOS  | Haselnuss        | top  | EYE  | 112                   | die Pupillen der blauäugigen Kinder schwarz färben, wenn der                                                                                                                             |
| <i>Corylus avellana</i> L.   | Betulaceae    | ant   | DIOS  | Haselnuss        | syst | RES  | 112                   | Vorderkopf damit engerieben wird.                                                                                                                                                        |
| <i>Corylus avellana</i> L.   | Betulaceae    | ant   | DIOS  | Haselnuss        | syst | RES  | 112                   | veralteten Husten                                                                                                                                                                        |
| <i>Corylus avellana</i> L.   | Betulaceae    | ant   | DIOS  | Haselnuss        | syst | RES  | 112                   | lindern sie den Katarrh.                                                                                                                                                                 |
| <i>Corylus avellana</i> L.   | Betulaceae    | mon   | HvB   | Haselnuss        | top  | DER  | 3-11                  | wo Skroful am Menschen sind .....                                                                                                                                                        |
| <i>Corylus avellana</i> L.   | Betulaceae    | mon   | HvB   | Haselnuss        | syst | URO  | 3-11                  | Ein Mann, dessen Samen von dünnflüssiger Beschaffenheit ist, so                                                                                                                          |
| <i>Corylus avellana</i> L.   | Betulaceae    | ren   | LF    | Haselnuss        | syst | ANT  | <III - CXXXIII / CL I | dass erkeine Kinder zeugt                                                                                                                                                                |
| <i>Corylus avellana</i> L.   | Betulaceae    | ren   | LF    | Haselnuss        | syst | ANT  | <III - CXXXIII / CL I | kommen sie zuhilffenden so vnn einem scorpion gestochen sind                                                                                                                             |
| <i>Corylus avellana</i> L.   | Betulaceae    | ren   | LF    | Haselnuss        | syst | URO  | <III - CXXXIII / CL I | dem mag kein giftig thier denselben tag schaden                                                                                                                                          |
| <i>Corylus avellana</i> L.   | Betulaceae    | ren   | LF    | Haselnuss        | top  | DER  | <III - CXXXIII / CL I | macht das har widerumb wachsen                                                                                                                                                           |
| <i>Corylus avellana</i> L.   | Betulaceae    | ren   | LF    | Haselnuss        | top  | EYE  | <III - CXXXIII / CL I | an die das vorder teyl des haupts salb das sie den kindern die                                                                                                                           |
| <i>Corylus avellana</i> L.   | Betulaceae    | ren   | LF    | Haselnuss        | syst | RES  | <III - CXXXIII / CL I | grawen augen schwartz machen                                                                                                                                                             |
| <i>Corylus avellana</i> L.   | Betulaceae    | ren   | LF    | Haselnuss        | syst | RES  | <III - CXXXIII / CL I | dienstlich dem langwirigen husten                                                                                                                                                        |
| <i>Corylus avellana</i> L.   | Betulaceae    | ren   | LF    | Haselnuss        | syst | RES  | <III - CXXXIII / CL I | verzerehns die haupthfluss                                                                                                                                                               |
| <i>Corylus avellana</i> L.   | Betulaceae    | s pop | JK    | Haselnuss        | syst | FEV  | p. 368                | schweisstreibend, fieberbekämpfend                                                                                                                                                       |
| <i>Corylus avellana</i> L.   | Betulaceae    | s pop | JK    | Haselnuss        | syst | RES  | p. 368                | hartnäckigen Husten                                                                                                                                                                      |
| <i>Crocus sativus</i> L.     | Iridaceae     | ant   | DIOS  | Safran           | top  | DER  | 76                    | gegen Rose; Mundsalbe (mit Milch)                                                                                                                                                        |
| <i>Crocus sativus</i> L.     | Iridaceae     | ant   | DIOS  | Safran           | top  | DER  | 85                    | etermachend und die Wunden reinigend                                                                                                                                                     |
| <i>Crocus sativus</i> L.     | Iridaceae     | ant   | DIOS  | Safran           | top  | EAR  | 76                    | Ohrenflüsse                                                                                                                                                                              |
| <i>Crocus sativus</i> L.     | Iridaceae     | ant   | DIOS  | Safran           | n.d. | EYE  | 77                    | Verdunkelungen auf der Pupille reinigende                                                                                                                                                |
| <i>Crocus sativus</i> L.     | Iridaceae     | ant   | DIOS  | Safran           | top  | EYE  | 76                    | gegen Augenflüsse                                                                                                                                                                        |
| <i>Crocus sativus</i> L.     | Iridaceae     | ant   | DIOS  | Safran           | top  | EYE  | 85                    | es wirkt gegen beginnenden Star,                                                                                                                                                         |
| <i>Crocus sativus</i> L.     | Iridaceae     | ant   | DIOS  | Safran           | n.d. | GAS  | 77                    | erweichende, die Verdauung befördernde und erwärmende Kraft                                                                                                                              |
| <i>Crocus sativus</i> L.     | Iridaceae     | ant   | DIOS  | Safran           | top  | GVN  | 85                    | Verhärtungen und Verstopfungen in der Gebärmutter und gegen                                                                                                                              |
| <i>Crocus sativus</i> L.     | Iridaceae     | ant   | DIOS  | Safran           | top  | NER  | 85                    | die böartigen Geschwüre                                                                                                                                                                  |
| <i>Crocus sativus</i> L.     | Iridaceae     | ant   | DIOS  | Safran           | top  | NER  | 85                    | schmerzliche Kraft, Mithras                                                                                                                                                              |
| <i>Crocus sativus</i> L.     | Iridaceae     | ant   | DIOS  | Safran           | n.d. | OTH  | 76                    | gegen den Bauch                                                                                                                                                                          |
| <i>Crocus sativus</i> L.     | Iridaceae     | ant   | DIOS  | Safran           | n.d. | URO  | 77                    | harnstreibende (Kraft)                                                                                                                                                                   |
| <i>Crocus sativus</i> L.     | Iridaceae     | ant   | DIOS  | Safran           | syst | URO  | 76                    | treibt den Urin                                                                                                                                                                          |
| <i>Crocus sativus</i> L.     | Iridaceae     | mon   | LO    | Safran           | n.d. | OTH  | n.d.                  | n.d.                                                                                                                                                                                     |
| <i>Crocus sativus</i> L.     | Iridaceae     | ren   | LF    | Safran           | syst | APH  | CXLVIII / CLXVII      | reizt zu der unkeuschheyt                                                                                                                                                                |
| <i>Crocus sativus</i> L.     | Iridaceae     | ren   | LF    | Safran           | top  | DER  | CXLVIII / CLXVII      | lindert die hitz insonderheit das rotlauff                                                                                                                                               |
| <i>Crocus sativus</i> L.     | Iridaceae     | ren   | LF    | Safran           | top  | EYE  | CXLVIII / CLXVII      | ist er gut zu den trieffenden Augen                                                                                                                                                      |
| <i>Crocus sativus</i> L.     | Iridaceae     | ren   | LF    | Safran           | syst | GAS  | CXLVIII / CLXVII      | bekommt wohl dem bliden verkehten magen                                                                                                                                                  |
| <i>Crocus sativus</i> L.     | Iridaceae     | ren   | LF    | Safran           | syst | OTH  | CXLVIII / CLXVII      | mit süßem Wein getrunken verhütet er die Trunkenheit                                                                                                                                     |
| <i>Crocus sativus</i> L.     | Iridaceae     | ren   | LF    | Safran           | syst | RES  | CXLVIII / CLXVII      | auch nützlich der Brust, ist nützlich denen so husten                                                                                                                                    |
| <i>Crocus sativus</i> L.     | Iridaceae     | ren   | LF    | Safran           | top  | SKE  | CXLVIII / CLXVII      | weetagen der fuess                                                                                                                                                                       |
| <i>Crocus sativus</i> L.     | Iridaceae     | ren   | LF    | Safran           | syst | URO  | CXLVIII / CLXVII      | treibt den harn                                                                                                                                                                          |
| <i>Crocus sativus</i> L.     | Iridaceae     | s pop | WI    | Safran           | syst | NER  | p. 176                | Volksmedizin: Sedativum, Spasmolytikum                                                                                                                                                   |
| <i>Crocus sativus</i> L.     | Iridaceae     | s pop | WI    | Safran           | syst | NER  | p. 176                | Volksmedizin: Stomachikum                                                                                                                                                                |
| <i>Cucurbita pepo</i> L.     | Cucurbitaceae | ant   | DIOS  | Kürbis           | top  | DER  | 149                   | besänftigt er Ödeme und Eiterbeulen                                                                                                                                                      |
| <i>Cucurbita pepo</i> L.     | Cucurbitaceae | ant   | DIOS  | Kürbis           | top  | EYE  | 149                   | gegen Augenentzündungen                                                                                                                                                                  |
| <i>Cucurbita pepo</i> L.     | Cucurbitaceae | ant   | DIOS  | Kürbis           | syst | GAS  | 149                   | löst den Bauch gelinde; so erweicht er den Bauch leicht                                                                                                                                  |
| <i>Cucurbita pepo</i> L.     | Cucurbitaceae | ant   | DIOS  | Kürbis           | top  | NER  | 149                   | Kindern, welche am Sonnenstich leiden                                                                                                                                                    |
| <i>Cucurbita pepo</i> L.     | Cucurbitaceae | ant   | DIOS  | Kürbis           | top  | SKE  | 149                   | Podagra                                                                                                                                                                                  |
| <i>Cucurbita pepo</i> L.     | Cucurbitaceae | ant   | DIOS  | Kürbis           | top  | SKE  | 149                   | mit Rosendöl eingetropfelt gegen Ohrenschmerzen                                                                                                                                          |
| <i>Cucurbita pepo</i> L.     | Cucurbitaceae | ant   | DIOS  | Kürbis           | top  | SKE  | 149                   | auch bei dem durch Hitze angegriffenen Gesicht                                                                                                                                           |
| <i>Cucurbita pepo</i> L.     | Cucurbitaceae | ant   | DIOS  | Kürbis           | top  | SKE  | 187                   | Und sie sind für Kranke und Gesunde gut zu essen                                                                                                                                         |
| <i>Cucurbita pepo</i> L.     | Cucurbitaceae | mon   | HvB   | Kürbis           | syst | n.d. | so                    | lescht sie den menschlichen Samen und machen unlust zu den                                                                                                                               |
| <i>Cucurbita pepo</i> L.     | Cucurbitaceae | ren   | LF    | Kürbis           | syst | APH  | CCCXCVIII / CCLVII    | ehelichen werken                                                                                                                                                                         |
| <i>Cucurbita pepo</i> L.     | Cucurbitaceae | ren   | LF    | Kürbis           | vol  | CAR  | CCCXCVIII / CCLVII    | in onmacht - kommt er wiederum zu sich                                                                                                                                                   |
| <i>Cucurbita pepo</i> L.     | Cucurbitaceae | ren   | LF    | Kürbis           | top  | DER  | CCCXCVIII / CCLVII    | angestrichen macht ein schön angesicht, vertreiben sie allerley                                                                                                                          |
| <i>Cucurbita pepo</i> L.     | Cucurbitaceae | ren   | LF    | Kürbis           | top  | DER  | CCCXCVIII / CCLVII    | masen, flecken, rosmucken                                                                                                                                                                |
| <i>Cucurbita pepo</i> L.     | Cucurbitaceae | ren   | LF    | Kürbis           | top  | DER  | CCCXCVIII / CCLVII    | biss der hunde                                                                                                                                                                           |
| <i>Cucurbita pepo</i> L.     | Cucurbitaceae | ren   | LF    | Kürbis           | top  | DER  | CCCXCVIII / CCLVII    | heylt sie die fließende schwaer                                                                                                                                                          |
| <i>Cucurbita pepo</i> L.     | Cucurbitaceae | ren   | LF    | Kürbis           | top  | EYE  | CCCXCVIII / CCLVII    | über die stirn legt, leschen sidie hitz der augen                                                                                                                                        |
| <i>Cucurbita pepo</i> L.     | Cucurbitaceae | ren   | LF    | Kürbis           | syst | GAS  | CCCXCVIII / CCLVII    | lindern den bauch und sind gut dem hitzigen Magen                                                                                                                                        |
| <i>Cucurbita pepo</i> L.     | Cucurbitaceae | ren   | LF    | Kürbis           | syst | GAS  | CCCXCVIII / CCLVII    | macht speien                                                                                                                                                                             |
| <i>Cucurbita pepo</i> L.     | Cucurbitaceae | ren   | LF    | Kürbis           | syst | GAS  | CCCXCVIII / CCLVII    | macht speien                                                                                                                                                                             |
| <i>Cucurbita pepo</i> L.     | Cucurbitaceae | ren   | LF    | Kürbis           | syst | URO  | CCCXCVIII / CCLVII    | sind auch der blasen nützlich                                                                                                                                                            |
| <i>Cucurbita pepo</i> L.     | Cucurbitaceae | ren   | LF    | Kürbis           | syst | URO  | CCCXCVIII / CCLVII    | treibt den harn                                                                                                                                                                          |
| <i>Cucurbita pepo</i> L.     | Cucurbitaceae | ren   | LF    | Kürbis           | syst | URO  | CCCXCVIII / CCLVII    | treibt den Lendenstein                                                                                                                                                                   |
| <i>Cucurbita pepo</i> L.     | Cucurbitaceae | s pop | JK    | Kürbis           | top  | DER  | p. 385                | Wundsalbe für brennende Füße, entzündete Geschwüre, Krampfadern, Greisenbrand                                                                                                            |
| <i>Cucurbita pepo</i> L.     | Cucurbitaceae | s pop | JK    | Kürbis           | syst | GAS  | p. 385                | Bandwürms                                                                                                                                                                                |
| <i>Cucurbita pepo</i> L.     | Cucurbitaceae | s pop | JK    | Kürbis           | syst | URO  | p. 385                | Blutreinigungsmittel, Nierenentzündung und Zuckerkrankheit                                                                                                                               |
| <i>Cucurbita pepo</i> L.     | Cucurbitaceae | s pop | UB    | Kürbis           | syst | URO  | p. 262                | benigner Prostatahyperplasie                                                                                                                                                             |
| <i>Cucurbita pepo</i> L.     | Cucurbitaceae | s pop | UB    | Kürbis           | syst | URO  | p. 262                | benigner Prostatahyperplasie                                                                                                                                                             |
| <i>Cucurbita pepo</i> L.     | Cucurbitaceae | sci   | EMA   | Kürbis           | syst | URO  | IMPC/136024/2010      | for the relief of lower urinary tract symptoms related to benign                                                                                                                         |
| <i>Cucurbita pepo</i> L.     | Cucurbitaceae | sci   | EMA   | Kürbis           | syst | URO  | IMPC/136024/2010      | prostatic hyperplasia                                                                                                                                                                    |
| <i>Cucurbita pepo</i> L.     | Cucurbitaceae | sci   | EMA   | Kürbis           | syst | URO  | IMPC/136024/2010      | for the relief of lower urinary tract symptoms related to benign                                                                                                                         |
| <i>Cucurbita pepo</i> L.     | Cucurbitaceae | sci   | EMA   | Kürbis           | syst | URO  | IMPC/136024/2010      | prostatic hyperplasia                                                                                                                                                                    |
| <i>Cucurbita pepo</i> L.     | Cucurbitaceae | sci   | ESCAP | Cucurbitae semen | syst | URO  | II, p. 50             | hyperplasia, irritable bladder                                                                                                                                                           |
| <i>Cucurbita pepo</i> L.     | Cucurbitaceae | sci   | WI    | Kürbis           | syst | URO  | p. 179                | dysurische Beschwerden (benignes Prostata Adenom)                                                                                                                                        |
| <i>Cydonia oblonga</i> Mill. | Rosaceae      | ant   | DIOS  | Quitte           | syst | ANT  | 82                    | getrunken gegen Kanthariden, Buprestis und die giftigen                                                                                                                                  |
| <i>Cydonia oblonga</i> Mill. | Rosaceae      | ant   | DIOS  | Quitte           | top  | DER  | 82                    | Fichtenraupen                                                                                                                                                                            |
| <i>Cydonia oblonga</i> Mill. | Rosaceae      | ant   | DIOS  | Quitte           | top  | DER  | 82                    | wirkt gegen krätzige Geschwüre, Kleingrind, Frostbeulen,                                                                                                                                 |
| <i>Cydonia oblonga</i> Mill. | Rosaceae      | ant   | DIOS  | Quitte           | top  | DER  | 82                    | kriechende Geschwüre                                                                                                                                                                     |
| <i>Cydonia oblonga</i> Mill. | Rosaceae      | ant   | DIOS  | Quitte           | top  | DER  | 82                    | Mastdarm und Gebärmuttervorfall                                                                                                                                                          |
| <i>Cydonia oblonga</i> Mill. | Rosaceae      | ant   | DIOS  | Quitte           | top  | DER  | 82                    | Condylomen                                                                                                                                                                               |
| <i>Cydonia oblonga</i> Mill. | Rosaceae      | ant   | DIOS  | Quitte           | top  | EYE  | 82                    | bei Augenentzündungen                                                                                                                                                                    |

|                              |               |       |      |               |       |     |                     |                                                                                                                                    |
|------------------------------|---------------|-------|------|---------------|-------|-----|---------------------|------------------------------------------------------------------------------------------------------------------------------------|
| <i>Cydonia oblonga</i> Mill. | Rosaceae      | ant   | DIOS | Quitte        | syst  | GAS | 108                 | die an Magen, Dysenterie, Blutspeien und Cholera leiden; Aufguss davon ist denen als Trank zu empfehlen, die Magen- und Bauchfluss |
| <i>Cydonia oblonga</i> Mill. | Rosaceae      | ant   | DIOS | Quitte        | top   | GAS | 82                  | Kataplasmen gemischt zum Stopfen des Durchfalls, gegen                                                                             |
| <i>Cydonia oblonga</i> Mill. | Rosaceae      | ant   | DIOS | Quitte        | syst  | GYN | 82                  | krampfartige Bewegung und Hitze des Magens; Leberverhärtung                                                                        |
| <i>Cydonia oblonga</i> Mill. | Rosaceae      | ant   | DIOS | Quitte        | top   | GYN | 82                  | Gegen Blutsturz, Bauchfluss und übermäßige Menstruation                                                                            |
| <i>Cydonia oblonga</i> Mill. | Rosaceae      | ant   | DIOS | Quitte        | top   | GYN | 82                  | gegen Verwundungen in der Gebärmutter                                                                                              |
| <i>Cydonia oblonga</i> Mill. | Rosaceae      | ant   | DIOS | Quitte        | top   | GYN | 82                  | [Mastdarm und Gebärmutter]vorfall                                                                                                  |
| <i>Cydonia oblonga</i> Mill. | Rosaceae      | ant   | DIOS | Quitte        | top   | GYN | 82                  | bei schmerzhaften Brüsten                                                                                                          |
| <i>Cydonia oblonga</i> Mill. | Rosaceae      | ant   | DIOS | Quitte        | top   | OTH | 82                  | hält den Schweiß zurück                                                                                                            |
| <i>Cydonia oblonga</i> Mill. | Rosaceae      | ant   | DIOS | Quitte        | top   | OTH | 82                  | Orthopnoe leiden                                                                                                                   |
| <i>Cydonia oblonga</i> Mill. | Rosaceae      | ant   | DIOS | Quitte        | syst  | URO | 82                  | sind gleichfalls harntreibend                                                                                                      |
| <i>Cydonia oblonga</i> Mill. | Rosaceae      | ant   | DIOS | Quitte        | top   | URO | 82                  | stellt als Injektion das zu häufige Harnen                                                                                         |
| <i>Cydonia oblonga</i> Mill. | Rosaceae      | mon   | HvB  | Quitte        | top   | DER | 3-4                 | Aber wo es an einem Menschen Geschwüre oder Überliechendes hat                                                                     |
| <i>Cydonia oblonga</i> Mill. | Rosaceae      | mon   | HvB  | Quitte        | syst  | GAS | 3-4                 | Und wer viel Speichel auswirft, esse oft diese Frucht, so dass der                                                                 |
| <i>Cydonia oblonga</i> Mill. | Rosaceae      | mon   | HvB  | Quitte        | syst  | SKE | 3-4                 | denn wer gichtkrank ist, esse oft diese Frucht gekocht und gebraten                                                                |
| <i>Cydonia oblonga</i> Mill. | Rosaceae      | ren   | LF   | Quitte        | top   | DER | CCXCI / CXL         | heylet die carbunkel, bringt auch das Haar wieder denen es ausfällt                                                                |
| <i>Cydonia oblonga</i> Mill. | Rosaceae      | ren   | LF   | Quitte        | syst  | EYE | CCXCI / CXL         | hitzigen Augen                                                                                                                     |
| <i>Cydonia oblonga</i> Mill. | Rosaceae      | ren   | LF   | Quitte        | syst  | GAS | CCXCI / CXL         | Bauchfluss haben                                                                                                                   |
| <i>Cydonia oblonga</i> Mill. | Rosaceae      | ren   | LF   | Quitte        | syst  | GAS | CCXCI / CXL         | denen so blut speyen                                                                                                               |
| <i>Cydonia oblonga</i> Mill. | Rosaceae      | ren   | LF   | Quitte        | syst  | GAS | CCXCI / CXL         | sind dem Magen dienstlich, bauchfluss, rote rhr und blut speien                                                                    |
| <i>Cydonia oblonga</i> Mill. | Rosaceae      | ren   | LF   | Quitte        | top   | GAS | CCXCI / CXL         | bauchlaufen haen, dem überwerffen des magens                                                                                       |
| <i>Cydonia oblonga</i> Mill. | Rosaceae      | ren   | LF   | Quitte        | syst  | GYN | CCXCI / CXL         | frawen, die zuviel fliessen                                                                                                        |
| <i>Cydonia oblonga</i> Mill. | Rosaceae      | ren   | LF   | Quitte        | top   | GYN | CCXCI / CXL         | treiben die muter so aus dem leib                                                                                                  |
| <i>Cydonia oblonga</i> Mill. | Rosaceae      | ren   | LF   | Quitte        | syst  | URO | CCXCI / CXL         | treiben den harn                                                                                                                   |
| <i>Cydonia oblonga</i> Mill. | Rosaceae      | s pop | FLU  | Quitte        | top   | DER | p. 41               | Entzündungen der Mund- und Rachenhöhle, aufgesprungene Haut                                                                        |
| <i>Cydonia oblonga</i> Mill. | Rosaceae      | s pop | FLU  | Quitte        | syst  | GAS | p. 41               | mildes Abführmittel                                                                                                                |
| <i>Daucus carota</i> L.      | Apiaceae      | ant   | DIOS | Wilde Möhre   | syst  | ANT | 183                 | sowie gegen die Bisse und Stiche giftiger Tiere                                                                                    |
| <i>Daucus carota</i> L.      | Apiaceae      | ant   | DIOS | Wilde Möhre   | syst  | APH | 183                 | Ferner befördert er die Emofangnis                                                                                                 |
| <i>Daucus carota</i> L.      | Apiaceae      | ant   | DIOS | Wilde Möhre   | syst  | APH | 183                 | reizt sowohl zum Beischlaf                                                                                                         |
| <i>Daucus carota</i> L.      | Apiaceae      | ant   | DIOS | Wilde Möhre   | syst  | DER | 183                 | reinigen krebsige Geschwüre                                                                                                        |
| <i>Daucus carota</i> L.      | Apiaceae      | ant   | DIOS | Wilde Möhre   | syst  | GYN | 183                 | getrunken oder im Zapfen eingelegt befördert die Menstruation                                                                      |
| <i>Daucus carota</i> L.      | Apiaceae      | ant   | DIOS | Wilde Möhre   | syst  | GYN | 183                 | als auch wirft sie, im Zapfen eingelegt, den Embryo hinaus                                                                         |
| <i>Daucus carota</i> L.      | Apiaceae      | ant   | DIOS | Wilde Möhre   | syst  | OTH | 183                 | ist besser zum Essen                                                                                                               |
| <i>Daucus carota</i> L.      | Apiaceae      | ant   | DIOS | Wilde Möhre   | syst  | OTH | 183                 | Brustfellentzündung                                                                                                                |
| <i>Daucus carota</i> L.      | Apiaceae      | ant   | DIOS | Wilde Möhre   | syst  | URO | 183                 | Wassersucht,                                                                                                                       |
| <i>Daucus carota</i> L.      | Apiaceae      | ant   | DIOS | Wilde Möhre   | syst  | URO | 183                 | gegen Harnverhaltung                                                                                                               |
| <i>Daucus carota</i> L.      | Apiaceae      | ant   | DIOS | Wilde Möhre   | syst  | URO | 183                 | selbst harntreibend                                                                                                                |
| <i>Daucus carota</i> L.      | Apiaceae      | mon   | LO   | Karotte       | syst  | OTH | n.d.                | n.d.                                                                                                                               |
| <i>Daucus carota</i> L.      | Apiaceae      | ren   | LF   | Karotte       | syst  | ANT | - CCXCI / CCLXIII   | denen so von giftigen thieren gebissen sind                                                                                        |
| <i>Daucus carota</i> L.      | Apiaceae      | ren   | LF   | Karotte       | syst  | APH | - CCXCI / CCLXIII   | reyzt zu den eelichen werken                                                                                                       |
| <i>Daucus carota</i> L.      | Apiaceae      | ren   | LF   | Karotte       | syst  | APH | - CCXCI / CCLXIII   | bringen lust zu eelichen werken                                                                                                    |
| <i>Daucus carota</i> L.      | Apiaceae      | ren   | LF   | Karotte       | syst  | APH | - CCXCI / CCLXIII   | ist er nachmals vor gedachten [giftigen] thiern sicher                                                                             |
| <i>Daucus carota</i> L.      | Apiaceae      | ren   | LF   | Karotte       | syst  | APH | - CCXCI / CCLXIII   | reynigen und heylen die umb sich fressende geschwaer                                                                               |
| <i>Daucus carota</i> L.      | Apiaceae      | ren   | LF   | Karotte       | syst  | APH | - CCXCI / CCLXIII   | ist nützlich zu den gebresten der leber                                                                                            |
| <i>Daucus carota</i> L.      | Apiaceae      | ren   | LF   | Karotte       | syst  | GYN | - CCXCI / CCLXIII   | bringt den frawen ire zeit / er furdert zu der geburt                                                                              |
| <i>Daucus carota</i> L.      | Apiaceae      | ren   | LF   | Karotte       | syst  | GYN | - CCXCI / CCLXIII   | ist gut den frawen so die muter übersch steigt unnd legt den                                                                       |
| <i>Daucus carota</i> L.      | Apiaceae      | ren   | LF   | Karotte       | syst  | GYN | - CCXCI / CCLXIII   | schmerzen der muter                                                                                                                |
| <i>Daucus carota</i> L.      | Apiaceae      | ren   | LF   | Karotte       | syst  | GYN | - CCXCI / CCLXIII   | bringt den frawen ire zeit                                                                                                         |
| <i>Daucus carota</i> L.      | Apiaceae      | ren   | LF   | Karotte       | syst  | GYN | - CCXCI / CCLXIII   | treibt den frawen ire zeit                                                                                                         |
| <i>Daucus carota</i> L.      | Apiaceae      | ren   | LF   | Karotte       | syst  | OTH | - CCXCI / CCLXIII   | ist nützlich zu den gebresten des milch                                                                                            |
| <i>Daucus carota</i> L.      | Apiaceae      | ren   | LF   | Karotte       | syst  | OTH | - CCXCI / CCLXIII   | treibt den harn / ist gut den wassersüchtigen                                                                                      |
| <i>Daucus carota</i> L.      | Apiaceae      | ren   | LF   | Karotte       | syst  | URO | - CCXCI / CCLXIII   | treibt den harn                                                                                                                    |
| <i>Daucus carota</i> L.      | Apiaceae      | ren   | LF   | Karotte       | syst  | URO | - CCXCI / CCLXIII   | ist nützlich zu den gebresten der nieren un lenden                                                                                 |
| <i>Daucus carota</i> L.      | Apiaceae      | s pop | JK   | Karotte       | top   | DER | p. 407              | frische Wunden, Frostbeulen und aufgebrungene Wunden                                                                               |
| <i>Daucus carota</i> L.      | Apiaceae      | s pop | JK   | Karotte       | top   | DER | p. 407              | Lupus                                                                                                                              |
| <i>Daucus carota</i> L.      | Apiaceae      | s pop | JK   | Karotte       | top   | DER | p. 407              | Zahnweh, Mundgeschwulsten und Mundfäule                                                                                            |
| <i>Daucus carota</i> L.      | Apiaceae      | s pop | JK   | Karotte       | syst  | GAS | p. 407              | Würmer, Gelbsucht                                                                                                                  |
| <i>Daucus carota</i> L.      | Apiaceae      | s pop | JK   | Karotte       | syst  | RES | p. 407              | Kehlkopfentzündungen und Brustleiden                                                                                               |
| <i>Daucus carota</i> L.      | Apiaceae      | s pop | JK   | Karotte       | syst  | RES | p. 407              | Brustwassersucht                                                                                                                   |
| <i>Daucus carota</i> L.      | Apiaceae      | s pop | JK   | Karotte       | syst  | RES | p. 407              | Schwindsucht der Kehle und deren Entzündung                                                                                        |
| <i>Daucus carota</i> L.      | Apiaceae      | s pop | JK   | Karotte       | syst  | TON | p. 407              | Stärkung für Schwindsüchtige                                                                                                       |
| <i>Daucus carota</i> L.      | Apiaceae      | s pop | UB   | Karotte       | syst  | GAS | p. 125              | Durchfall                                                                                                                          |
| <i>Eryngium campestre</i> L. | Apiaceae      | ant   | DIOS | Feldmannstreu | syst  | ANT | 172                 | die von giftigen Tieren gebissen sind und die tödliche Gifte                                                                       |
| <i>Eryngium campestre</i> L. | Apiaceae      | ant   | DIOS | Feldmannstreu | other | DER | 172                 | genossen haben                                                                                                                     |
| <i>Eryngium campestre</i> L. | Apiaceae      | ant   | DIOS | Feldmannstreu | top   | DER | 172                 | verteilt es (als Amulett) umgebunden [und als Kataplasma]                                                                          |
| <i>Eryngium campestre</i> L. | Apiaceae      | ant   | DIOS | Feldmannstreu | top   | DER | 172                 | Geschwülste                                                                                                                        |
| <i>Eryngium campestre</i> L. | Apiaceae      | ant   | DIOS | Feldmannstreu | syst  | GAS | 172                 | verteilt es [(als Amulett) umgebunden] und als Kataplasma                                                                          |
| <i>Eryngium campestre</i> L. | Apiaceae      | ant   | DIOS | Feldmannstreu | syst  | GYN | 172                 | vertreibt Leibschniden und Blähungen. Mit Wein hilft es denen, die                                                                 |
| <i>Eryngium campestre</i> L. | Apiaceae      | ant   | DIOS | Feldmannstreu | syst  | NER | 172                 | an der Leber leiden                                                                                                                |
| <i>Eryngium campestre</i> L. | Apiaceae      | ant   | DIOS | Feldmannstreu | syst  | OTH | 172                 | (fordert) die Menstruation                                                                                                         |
| <i>Eryngium campestre</i> L. | Apiaceae      | ant   | DIOS | Feldmannstreu | syst  | URO | 172                 | Die Wurzel desselben mit Honigmeth getrunken heilt Opisthotonie                                                                    |
| <i>Eryngium campestre</i> L. | Apiaceae      | mon   | HvB  | Feldmannstreu | syst  | CAR | 1-99                | und Epilepsie                                                                                                                      |
| <i>Eryngium campestre</i> L. | Apiaceae      | mon   | HvB  | Feldmannstreu | syst  | NER | 1-99                | jungen Blätter werden in Salzlake eingemacht als Gemüse                                                                            |
| <i>Eryngium campestre</i> L. | Apiaceae      | mon   | HvB  | Feldmannstreu | syst  | NER | 1-99                | fordert getrunken den Harn                                                                                                         |
| <i>Eryngium campestre</i> L. | Apiaceae      | mon   | HvB  | Feldmannstreu | syst  | NER | 1-99                | Stechen in seinem Herzen (oder an einer anderen Stelle)                                                                            |
| <i>Eryngium campestre</i> L. | Apiaceae      | mon   | HvB  | Feldmannstreu | syst  | NER | 1-99                | Stechen [in seinem Herzen] oder an einer anderen Stelle oder in                                                                    |
| <i>Eryngium campestre</i> L. | Apiaceae      | ren   | LF   | Mannstreu     | syst  | ANT | CLXVI / CXII        | einem seiner Glieder Schmerzen hat                                                                                                 |
| <i>Eryngium campestre</i> L. | Apiaceae      | ren   | LF   | Mannstreu     | top   | DER | CLXVI / CXII        | und denen so gift getruncken haben und von giftigen thiern                                                                         |
| <i>Eryngium campestre</i> L. | Apiaceae      | ren   | LF   | Mannstreu     | syst  | GAS | CLXVI / CXII        | gebissen                                                                                                                           |
| <i>Eryngium campestre</i> L. | Apiaceae      | ren   | LF   | Mannstreu     | syst  | GAS | CLXVI / CXII        | so verzert sie geschwulst und knollen                                                                                              |
| <i>Eryngium campestre</i> L. | Apiaceae      | ren   | LF   | Mannstreu     | syst  | GYN | CLXVI / CXII        | so verzert sie geschwulst und knollen                                                                                              |
| <i>Eryngium campestre</i> L. | Apiaceae      | ren   | LF   | Mannstreu     | syst  | NER | CLXVI / CXII        | stilt das bauchgrimmen und vertreibt die blaest / sie ist auch gut                                                                 |
| <i>Eryngium campestre</i> L. | Apiaceae      | ren   | LF   | Mannstreu     | syst  | URO | CLXVI / CXII        | zu den lebersüchtigen                                                                                                              |
| <i>Eryngium campestre</i> L. | Apiaceae      | ren   | LF   | Mannstreu     | syst  | URO | CLXVI / CXII        | so das darmnicht haben                                                                                                             |
| <i>Eryngium campestre</i> L. | Apiaceae      | ren   | LF   | Mannstreu     | syst  | URO | CLXVI / CXII        | und bringt den frawen ire zeit                                                                                                     |
| <i>Eryngium campestre</i> L. | Apiaceae      | ren   | LF   | Mannstreu     | syst  | URO | CLXVI / CXII        | so den fallenden siechtigen haben un den krampf                                                                                    |
| <i>Eryngium campestre</i> L. | Apiaceae      | ren   | LF   | Mannstreu     | syst  | URO | CLXVI / CXII        | treibt den harn                                                                                                                    |
| <i>Eryngium campestre</i> L. | Apiaceae      | ren   | LF   | Mannstreu     | syst  | URO | CLXVI / CXII        | für den lendenstein                                                                                                                |
| <i>Eryngium campestre</i> L. | Apiaceae      | s pop | VAL  | Feldmannstreu | syst  | URO | p. 218              | propriétés: diurétique                                                                                                             |
| <i>Euphorbia esula</i> agg.  | Euphorbiaceae | ant   | DIOS | Wolfsmilch    | top   | DER | 254                 | Der frische Saft entfernt auch die Haare                                                                                           |
| <i>Euphorbia esula</i> agg.  | Euphorbiaceae | ant   | DIOS | Wolfsmilch    | top   | DER | 254                 | Aufgestrichen vertreibt er ferner Ge- schwüre und gestielte Warzen,                                                                |
| <i>Euphorbia esula</i> agg.  | Euphorbiaceae | ant   | DIOS | Wolfsmilch    | top   | DER | 254                 | sowie Feigwarzen und Flechten bei übergewachsenen Nägeln und                                                                       |
| <i>Euphorbia esula</i> agg.  | Euphorbiaceae | ant   | DIOS | Wolfsmilch    | top   | DER | 254                 | Karbunkeln, bei krebsigen, fressenden                                                                                              |
| <i>Euphorbia esula</i> agg.  | Euphorbiaceae | ant   | DIOS | Wolfsmilch    | top   | DER | 254                 | Geschwüren und Fisteln                                                                                                             |
| <i>Euphorbia esula</i> agg.  | Euphorbiaceae | ant   | DIOS | Wolfsmilch    | top   | DER | 254                 | leisten dasselbe wie der Saft [Purgieren]                                                                                          |
| <i>Euphorbia esula</i> agg.  | Euphorbiaceae | ant   | DIOS | Wolfsmilch    | top   | DER | 254                 | Der Saft hat die Kraft, den Bauch nach unten zu reinigen ... indem                                                                 |
| <i>Euphorbia esula</i> agg.  | Euphorbiaceae | ant   | DIOS | Wolfsmilch    | top   | DER | 254                 | er Schleim und Galle abführt                                                                                                       |
| <i>Euphorbia esula</i> agg.  | Euphorbiaceae | ant   | DIOS | Wolfsmilch    | top   | DER | 254                 | reinigt den Bauch                                                                                                                  |
| <i>Euphorbia esula</i> agg.  | Euphorbiaceae | ant   | DIOS | Wolfsmilch    | top   | DER | 254                 | auch in die hohlen Zähne gesteckt, da er die Schmerzen lindert;                                                                    |
| <i>Euphorbia esula</i> agg.  | Euphorbiaceae | ant   | DIOS | Wolfsmilch    | top   | DER | 254                 | hilft sie bei Zahnschmerzen                                                                                                        |
| <i>Euphorbia esula</i> agg.  | Euphorbiaceae | ant   | DIOS | Wolfsmilch    | top   | DER | 254                 | bisweilen gegen einen verhärteten Magen gewissen Tränken                                                                           |
| <i>Euphorbia esula</i> agg.  | Euphorbiaceae | mon   | HvB  | Wolfsmilch    | syst  | GAS | 1-51                | begefügt                                                                                                                           |
| <i>Euphorbia esula</i> agg.  | Euphorbiaceae | ren   | LF   | Wolfsmilch    | top   | DER | - CCCLXVII / CCCXVI | har, grind und wartzten damit zu vertreiben                                                                                        |
| <i>Euphorbia esula</i> agg.  | Euphorbiaceae | ren   | LF   | Wolfsmilch    | top   | DER | - CCCLXVII / CCCXVI | zu dem erbgind                                                                                                                     |
| <i>Euphorbia esula</i> agg.  | Euphorbiaceae | ren   | LF   | Wolfsmilch    | syst  | URO | - CCCLXVII / CCCXVI | treibt aus allerley wässrige feuchtigkeit, darumb seind die                                                                        |
| <i>Euphorbia esula</i> agg.  | Euphorbiaceae | s pop | JK   | Wolfsmilch    | top   | DER | p. 445              | wolfsmilch insonderheyt nützlich den wassersüchtigen                                                                               |
| <i>Ficus carica</i> L.       | Moraceae      | ant   | DIOS | Feige         | top   | ANT | 113                 | warzen, Nasenkrebs                                                                                                                 |
| <i>Ficus carica</i> L.       | Moraceae      | ant   | DIOS | Feige         | top   | ANT | 113                 | Skorpionstiche und Bisse von giftigen Tieren und Hunden                                                                            |



Dal Cero M., Saller R., Leonti M., Weckerle C.S.

Dal Cero M., Saller R., Leonti M., Weckerle C.S.

|                                   |               |       |      |                   |           |                                                                                                                               |
|-----------------------------------|---------------|-------|------|-------------------|-----------|-------------------------------------------------------------------------------------------------------------------------------|
|                                   |               |       |      |                   |           | Traditional herbal medicinal product used in mild dyspeptic/gastrointestinal disorders, and/or in temporary loss of appetite. |
| <i>Gentiana lutea</i> agg.        | Gentianaceae  | sci   | EMA  | Gelber Enzian     | syst. GAS | 1MPC/578324/2008                                                                                                              |
| <i>Gentiana lutea</i> agg.        | Gentianaceae  | sci   | WT   | Gelber Enzian     | syst. GAS | p. 255. kräftiges Bittermittel                                                                                                |
| <i>Gentiana lutea</i> agg.        | Gentianaceae  | sci   | WT   | Gelber Enzian     | syst. TON | p. 255 Roborans und Tonikum                                                                                                   |
| <i>Hedera helix</i> L.            | Araliaceae    | ant   | DIOS | Efeu              | syst. ANT | 162. hilft gegen den Biss der Spinnen.                                                                                        |
| <i>Hedera helix</i> L.            | Araliaceae    | ant   | DIOS | Efeu              | top. DER  | 162. Brandwunden                                                                                                              |
| <i>Hedera helix</i> L.            | Araliaceae    | ant   | DIOS | Efeu              | top. DER  | Wein gekocht dienen als Umschlag auf jedes Geschwür; böse                                                                     |
| <i>Hedera helix</i> L.            | Araliaceae    | ant   | DIOS | Efeu              | top. DER  | 162. Brandwunden und Sonnenbrandflecken heilen sie                                                                            |
| <i>Hedera helix</i> L.            | Araliaceae    | ant   | DIOS | Efeu              | top. EAR  | Saft in die Nasenlöcher getropft beseitigt schlechten Geruch und                                                              |
| <i>Hedera helix</i> L.            | Araliaceae    | ant   | DIOS | Efeu              | syst. GAS | 162. faulige Geschwüre.                                                                                                       |
| <i>Hedera helix</i> L.            | Araliaceae    | ant   | DIOS | Efeu              | syst. GYN | 162. Ohrenschmerzen und eiterflüssige Ohren heilt er mit Öl                                                                   |
| <i>Hedera helix</i> L.            | Araliaceae    | ant   | DIOS | Efeu              | syst. GYN | 162. Dysenterie                                                                                                               |
| <i>Hedera helix</i> L.            | Araliaceae    | ant   | DIOS | Efeu              | syst. GYN | 162. befördern die Katamenien                                                                                                 |
| <i>Hedera helix</i> L.            | Araliaceae    | ant   | DIOS | Efeu              | syst. GYN | 162. bewirken sie Unfruchtbarkeit                                                                                             |
| <i>Hedera helix</i> L.            | Araliaceae    | ant   | DIOS | Efeu              | syst. GYN | in die Gebärmutter gelegt, befördert die Menstruation und treibt                                                              |
| <i>Hedera helix</i> L.            | Araliaceae    | ant   | DIOS | Efeu              | syst. GYN | 162. den Embryo aus                                                                                                           |
| <i>Hedera helix</i> L.            | Araliaceae    | ant   | DIOS | Efeu              | top. NER  | 162. zum Begießen (des Kopfes) angewandt                                                                                      |
| <i>Hedera helix</i> L.            | Araliaceae    | ant   | DIOS | Efeu              | top. NER  | 162. in die Nase gebracht, er hilft dann gegen chronische Kopfschmerzen                                                       |
| <i>Hedera helix</i> L.            | Araliaceae    | ant   | DIOS | Efeu              | syst. OTH | greift die Nerven an, bewirkt Schläftheit und im Übermaß                                                                      |
| <i>Hedera helix</i> L.            | Araliaceae    | ant   | DIOS | Efeu              | top. OTH  | 162. Erschütterung des Verstandes                                                                                             |
| <i>Hedera helix</i> L.            | Araliaceae    | ant   | DIOS | Efeu              | top. OTH  | 162. färben die Fruchtdrüsen die Haare schwarz                                                                                |
| <i>Hedera helix</i> L.            | Araliaceae    | ant   | DIOS | Efeu              | top. OTH  | 162. entfernt die Haare und tötet, eingeschmiert, die Läuse                                                                   |
| <i>Hedera helix</i> L.            | Araliaceae    | ant   | DIOS | Efeu              | syst. OTH | 162. sind für die Milz heilsam                                                                                                |
| <i>Hedera helix</i> L.            | Araliaceae    | ant   | DIOS | Efeu              | syst. TEE | in das dem leidenden Zahn gegenüberliegende Ohr getropft, so                                                                  |
| <i>Hedera helix</i> L.            | Araliaceae    | mon   | HvB  | Efeu              | top. GAS  | 162. lindern sie die Zahnschmerzen                                                                                            |
| <i>Hedera helix</i> L.            | Araliaceae    | ren   | LF   | Efeu              | syst. ANT | 1-140 Gelbsucht                                                                                                               |
| <i>Hedera helix</i> L.            | Araliaceae    | ren   | LF   | Efeu              | top. DER  | + CCXXXVIII / CLX. gut denen so von giftigen thieren gebissen sind                                                            |
| <i>Hedera helix</i> L.            | Araliaceae    | ren   | LF   | Efeu              | top. DER  | + CCXXXVIII / CLX. gut übergelegt dem brand                                                                                   |
| <i>Hedera helix</i> L.            | Araliaceae    | ren   | LF   | Efeu              | top. DER  | + CCXXXVIII / CLX. machen schwarzes Haar                                                                                      |
| <i>Hedera helix</i> L.            | Araliaceae    | ren   | LF   | Efeu              | top. DER  | zu allerley wunden und schaden; vertreiben sie die maeler under                                                               |
| <i>Hedera helix</i> L.            | Araliaceae    | ren   | LF   | Efeu              | top. DER  | + CCXXXVIII / CLX. dem. angesicht und heylen den brand. krefftiglich.                                                         |
| <i>Hedera helix</i> L.            | Araliaceae    | ren   | LF   | Efeu              | top. EAR  | + CCXXXVIII / CLX. gut zu den weetagen der ohren und so sie schwaeren                                                         |
| <i>Hedera helix</i> L.            | Araliaceae    | ren   | LF   | Efeu              | syst. GAS | + CCXXXVIII / CLX. heylen die rhur                                                                                            |
| <i>Hedera helix</i> L.            | Araliaceae    | ren   | LF   | Efeu              | syst. GAS | + CCXXXVIII / CLX. treiben auss die wurm im laib                                                                              |
| <i>Hedera helix</i> L.            | Araliaceae    | ren   | LF   | Efeu              | syst. GAS | + CCXXXVIII / CLX. treiben auss die wurm im laib                                                                              |
| <i>Hedera helix</i> L.            | Araliaceae    | ren   | LF   | Efeu              | top. GYN  | + CCXXXVIII / CLX. bringen den frauen ihre krankheit                                                                          |
| <i>Hedera helix</i> L.            | Araliaceae    | ren   | LF   | Efeu              | top. NER  | + CCXXXVIII / CLX. über das haupt geschlagen nommt die weetagen desselbigen                                                   |
| <i>Hedera helix</i> L.            | Araliaceae    | ren   | LF   | Efeu              | top. OTH  | + CCXXXVIII / CLX. vertreibt die leuss                                                                                        |
| <i>Hedera helix</i> L.            | Araliaceae    | ren   | LF   | Efeu              | top. OTH  | + CCXXXVIII / CLX. über das mitz geschlagen heylen die gebrechen desselbigen                                                  |
| <i>Hedera helix</i> L.            | Araliaceae    | ren   | LF   | Efeu              | top. RES  | + CCXXXVIII / CLX. treibt den boesen gestank und reyniget die geschwaer darinn                                                |
| <i>Hedera helix</i> L.            | Araliaceae    | ren   | LF   | Efeu              | syst. URO | + CCXXXVIII / CLX. treiben den stein                                                                                          |
| <i>Hedera helix</i> L.            | Araliaceae    | s pop | UB   | Efeu              | syst. RES | p. 220 Auswurförderung                                                                                                        |
| <i>Hedera helix</i> L.            | Araliaceae    | sci   | EMA  | Efeu              | syst. RES | Traditional herbal medicinal product used as an expectorant in                                                                |
| <i>Hedera helix</i> L.            | Araliaceae    | sci   | EMA  | Efeu              | syst. RES | cough associated with cold.                                                                                                   |
| <i>Helleborus</i> spp.            | Ranunculaceae | ant   | DIOS | Schwarze Nieswurz | other APO | Well-established-use: Herbal preparations in solid or liquid dosage                                                           |
| <i>Helleborus</i> spp.            | Ranunculaceae | ant   | DIOS | Schwarze Nieswurz | top. CAR  | forms for oral use.                                                                                                           |
| <i>Helleborus</i> spp.            | Ranunculaceae | ant   | DIOS | Schwarze Nieswurz | top. DER  | Man streut ihn auch in den Wohnungen umher, weil man ihn für                                                                  |
| <i>Helleborus</i> spp.            | Ranunculaceae | ant   | DIOS | Schwarze Nieswurz | top. DER  | 249. reinigend hält                                                                                                           |
| <i>Helleborus</i> spp.            | Ranunculaceae | ant   | DIOS | Schwarze Nieswurz | top. DER  | Mit Gerstenmehl und Wein gibt er ein heilsames Kataplasma für                                                                 |
| <i>Helleborus</i> spp.            | Ranunculaceae | ant   | DIOS | Schwarze Nieswurz | top. DER  | 249. Wassersüchtige                                                                                                           |
| <i>Helleborus</i> spp.            | Ranunculaceae | ant   | DIOS | Schwarze Nieswurz | top. DER  | 249. Fisten reinigt er wenn er einglegt                                                                                       |
| <i>Helleborus</i> spp.            | Ranunculaceae | ant   | DIOS | Schwarze Nieswurz | top. DER  | Die Krätze heilt er in einer Salbe mit Weirrauch oder Wachs, Theer                                                            |
| <i>Helleborus</i> spp.            | Ranunculaceae | ant   | DIOS | Schwarze Nieswurz | top. DER  | und Cedernöl. Für sich allein mit Essig als Kataplasma heilt er                                                               |
| <i>Helleborus</i> spp.            | Ranunculaceae | ant   | DIOS | Schwarze Nieswurz | top. EAR  | 249. weisse Flecken, Flechten und Aussatz                                                                                     |
| <i>Helleborus</i> spp.            | Ranunculaceae | ant   | DIOS | Schwarze Nieswurz | top. EAR  | 249. In gleicher Weise wird er bei Schwerhörigkeit in die Ohren gesteckt                                                      |
| <i>Helleborus</i> spp.            | Ranunculaceae | ant   | DIOS | Schwarze Nieswurz | syst. GYN | 249. befördert er die Katamenien und tödtet den Embryo                                                                        |
| <i>Helleborus</i> spp.            | Ranunculaceae | ant   | DIOS | Schwarze Nieswurz | other HUM | Wenn er neben die Wurzeln des Weinstockes gepflanzt wird, so                                                                  |
| <i>Helleborus</i> spp.            | Ranunculaceae | ant   | DIOS | Schwarze Nieswurz | syst. HUM | 249. macht er den aus diesen gewonnenen Wein purgirend                                                                        |
| <i>Helleborus</i> spp.            | Ranunculaceae | ant   | DIOS | Schwarze Nieswurz | syst. HUM | 249. reinigt nach unten den Bauch, indem er Schleim und Galle abführt                                                         |
| <i>Helleborus</i> spp.            | Ranunculaceae | ant   | DIOS | Schwarze Nieswurz | syst. NER | 249. Er hilft bei Epilepsie, Melancholie, Wuthanfällen, [Gicht] und Paralyse.                                                 |
| <i>Helleborus</i> spp.            | Ranunculaceae | ant   | DIOS | Schwarze Nieswurz | n.d. OTH  | 249. Auch den faulniswidrigen Mitteln wird er zugesetzt                                                                       |
| <i>Helleborus</i> spp.            | Ranunculaceae | ant   | DIOS | Schwarze Nieswurz | syst. SKE | Er hilft bei [Epilepsie, Melancholie, Wuthanfällen,] Gicht [und                                                               |
| <i>Helleborus</i> spp.            | Ranunculaceae | ant   | DIOS | Schwarze Nieswurz | top. TEE  | 249. Paralyse]                                                                                                                |
| <i>Helleborus</i> spp.            | Ranunculaceae | ant   | DIOS | Schwarze Nieswurz | top. TEE  | 249. als Mundspülwasser lindert er Zahnschmerzen                                                                              |
| <i>Helleborus</i> spp.            | Ranunculaceae | mon   | MF   | Schwarze Nieswurz | top. CAR  | 57. trockenst du eine geschwollene Wassersucht aus                                                                            |
| <i>Helleborus</i> spp.            | Ranunculaceae | mon   | MF   | Schwarze Nieswurz | syst. CAR | 57. hilft bei Wassersucht                                                                                                     |
| <i>Helleborus</i> spp.            | Ranunculaceae | mon   | MF   | Schwarze Nieswurz | top. DER  | 57. behebt die Schwellung der Fisten                                                                                          |
| <i>Helleborus</i> spp.            | Ranunculaceae | mon   | MF   | Schwarze Nieswurz | top. DER  | entfernt die Male auf der Haut, reinigt den Aussatz und vertreibt alle                                                        |
| <i>Helleborus</i> spp.            | Ranunculaceae | mon   | MF   | Schwarze Nieswurz | top. DER  | 57. Art von Krätze                                                                                                            |
| <i>Helleborus</i> spp.            | Ranunculaceae | mon   | MF   | Schwarze Nieswurz | top. DER  | 57. verhärtete Geschwülste, die vereitert sind                                                                                |
| <i>Helleborus</i> spp.            | Ranunculaceae | mon   | MF   | Schwarze Nieswurz | top. EAR  | 57. gibt das Gehör zurück                                                                                                     |
| <i>Helleborus</i> spp.            | Ranunculaceae | mon   | MF   | Schwarze Nieswurz | syst. EYE | 57. macht trübe Augen heilsichtig                                                                                             |
| <i>Helleborus</i> spp.            | Ranunculaceae | mon   | MF   | Schwarze Nieswurz | syst. FEV | 57. vertreibt Fieber                                                                                                          |
| <i>Helleborus</i> spp.            | Ranunculaceae | mon   | MF   | Schwarze Nieswurz | top. GYN  | 57. sorgt für geordneten Monatsfluss und treibt die Leibesfrucht ab                                                           |
| <i>Helleborus</i> spp.            | Ranunculaceae | mon   | MF   | Schwarze Nieswurz | syst. NER | 57. heilt sie die Wahnwitzigen                                                                                                |
| <i>Helleborus</i> spp.            | Ranunculaceae | mon   | MF   | Schwarze Nieswurz | syst. SKE | 57. nützt der Fussgicht                                                                                                       |
| <i>Helleborus</i> spp.            | Ranunculaceae | mon   | MF   | Schwarze Nieswurz | syst. SKE | 57. der Gelähmte fühlt ganz wunderbare Hilfe                                                                                  |
| <i>Helleborus</i> spp.            | Ranunculaceae | mon   | MF   | Schwarze Nieswurz | syst. SKE | 57. behebt verschiedene Leiden der Gelenke                                                                                    |
| <i>Helleborus</i> spp.            | Ranunculaceae | mon   | MF   | Schwarze Nieswurz | top. TEE  | 57. soll ausserordentlich den Zahnschmerz lindern                                                                             |
| <i>Helleborus</i> spp.            | Ranunculaceae | ren   | LF   | Christrose        | syst. CAR | CLII + CLIII / CV. wassersucht                                                                                                |
| <i>Helleborus</i> spp.            | Ranunculaceae | ren   | LF   | Christrose        | top. DER  | CLII + CLIII / CV. alte schaden oder fisten                                                                                   |
| <i>Helleborus</i> spp.            | Ranunculaceae | ren   | LF   | Christrose        | top. DER  | heylet sie alle boese grind, rauden, flechten und gergleychen                                                                 |
| <i>Helleborus</i> spp.            | Ranunculaceae | ren   | LF   | Christrose        | top. DER  | CLII + CLIII / CV. ungestalt des laibs                                                                                        |
| <i>Helleborus</i> spp.            | Ranunculaceae | ren   | LF   | Christrose        | top. GYN  | CLII + CLIII / CV. bringt sie den frauen ire zeit mit gewalt                                                                  |
| <i>Helleborus</i> spp.            | Ranunculaceae | ren   | LF   | Christrose        | syst. NER | CLII + CLIII / CV. Leme der glieder                                                                                           |
| <i>Helleborus</i> spp.            | Ranunculaceae | s pop | VAL  | Schwarze Nieswurz | syst. GYN | p. 304 absence de règles                                                                                                      |
| <i>Heracleum sphondylium</i> agg. | Apiaceae      | ant   | DIOS | Bärenklau         | top. ANT  | 190. mit Raute als Umschlag heilt sie Schlangenbisse                                                                          |
| <i>Heracleum sphondylium</i> agg. | Apiaceae      | ant   | DIOS | Bärenklau         | top. DER  | Ringsum abgeschabt und einglegt bringt sie Wulste in Fisten zum                                                               |
| <i>Heracleum sphondylium</i> agg. | Apiaceae      | ant   | DIOS | Bärenklau         | top. DER  | 190. Verschwinden                                                                                                             |
| <i>Heracleum sphondylium</i> agg. | Apiaceae      | ant   | DIOS | Bärenklau         | top. EAR  | 190. ein gutes Mittel gegen geschwüre und eiterflüssige Ohren                                                                 |
| <i>Heracleum sphondylium</i> agg. | Apiaceae      | ant   | DIOS | Bärenklau         | syst. GAS | 190. weiter heilt sie, getrunken, Leberleiden, Gelbsucht                                                                      |
| <i>Heracleum sphondylium</i> agg. | Apiaceae      | ant   | DIOS | Bärenklau         | syst. GAS | 190. Auch die Wurzel wird Gelbsüchtigen und Leberleidenden gegeben                                                            |
| <i>Heracleum sphondylium</i> agg. | Apiaceae      | ant   | DIOS | Bärenklau         | syst. GYN | 190. weiter heilt sie, getrunken, [1] Mutterkrämpfe                                                                           |
| <i>Heracleum sphondylium</i> agg. | Apiaceae      | ant   | DIOS | Bärenklau         | syst. HUM | Seine Frucht scheidet, getrunken, den Schleim durch den                                                                       |
| <i>Heracleum sphondylium</i> agg. | Apiaceae      | ant   | DIOS | Bärenklau         | syst. HUM | 190. Stuhlgang aus                                                                                                            |
| <i>Heracleum sphondylium</i> agg. | Apiaceae      | ant   | DIOS | Bärenklau         | syst. NER | 190. weiter heilt sie, getrunken, [1] Epilepsie                                                                               |
| <i>Heracleum sphondylium</i> agg. | Apiaceae      | ant   | DIOS | Bärenklau         | vol. NER  | gutes Mittel für solche, die an Gehirnkrantheit, Lethargie und                                                                |
| <i>Heracleum sphondylium</i> agg. | Apiaceae      | ant   | DIOS | Bärenklau         | top. NER  | 190. Kopfschmerzen leiden                                                                                                     |
| <i>Heracleum sphondylium</i> agg. | Apiaceae      | ant   | DIOS | Bärenklau         | vol. NER  | 190. In der Raucherung weckt sie die von Schlafsucht Befallenen auf.                                                          |
| <i>Heracleum sphondylium</i> agg. | Apiaceae      | ant   | DIOS | Bärenklau         | syst. OTH | 190. weiter heilt sie, getrunken, [1] Orthopnoe                                                                               |
| <i>Heracleum sphondylium</i> agg. | Apiaceae      | mon   | LO   | Wiesenbärenklau   | n.d. OTH  | n.d.                                                                                                                          |
| <i>Heracleum sphondylium</i> agg. | Apiaceae      | ren   | LF   | Wiesenbärenklau   | top. DER  | XXIX - XXX / XV. sind nützlich zum brandt                                                                                     |
| <i>Heracleum sphondylium</i> agg. | Apiaceae      | ren   | LF   | Wiesenbärenklau   | syst. GAS | XXIX - XXX / XV. stellen den stuhlgang                                                                                        |
| <i>Heracleum sphondylium</i> agg. | Apiaceae      | ren   | LF   | Wiesenbärenklau   | syst. RES | XXIX - XXX / XV. den schwindtsichtigen und gebrochnen                                                                         |
| <i>Heracleum sphondylium</i> agg. | Apiaceae      | ren   | LF   | Wiesenbärenklau   | top. SKE  | XXIX - XXX / XV. podagra                                                                                                      |
| <i>Heracleum sphondylium</i> agg. | Apiaceae      | ren   | LF   | Wiesenbärenklau   | top. SKE  | XXIX - XXX / XV. denen die gleych verrückt und auseinander sind                                                               |
| <i>Heracleum sphondylium</i> agg. | Apiaceae      | ren   | LF   | Wiesenbärenklau   | syst. URO | XXIX - XXX / XV. treiben den harn                                                                                             |
| <i>Heracleum sphondylium</i> agg. | Apiaceae      | s pop | VAL  | Wiesenbärenklau   | syst. APH | p. 172 aphrodisiaque, asthenie sexuelle                                                                                       |
| <i>Heracleum sphondylium</i> agg. | Apiaceae      | s pop | VAL  | Wiesenbärenklau   | syst. CAR | p. 172 hypertension arterielle                                                                                                |
| <i>Heracleum sphondylium</i> agg. | Apiaceae      | s pop | VAL  | Wiesenbärenklau   | top. DER  | p. 172 oedemes, tumeurs, abcès, furoncles, ulcères atones                                                                     |

|                                   |              |           |                 |           |                                                                                                                                                                             |
|-----------------------------------|--------------|-----------|-----------------|-----------|-----------------------------------------------------------------------------------------------------------------------------------------------------------------------------|
| <i>Heracleum sphendylium</i> agg. | Apiaceae     | s pop VAL | Wiesenbärenklau | svst. GAS | p. 172 digestions pénible, météorisme                                                                                                                                       |
| <i>Heracleum sphendylium</i> agg. | Apiaceae     | s pop VAL | Wiesenbärenklau | svst. NER | p. 172 solesse                                                                                                                                                              |
| <i>Heracleum sphendylium</i> agg. | Apiaceae     | s pop VAL | Wiesenbärenklau | syst. OTH | p. 172 blennorrhée (gonorrhoe)                                                                                                                                              |
| <i>Heracleum sphendylium</i> agg. | Apiaceae     | s pop VAL | Wiesenbärenklau | syst. URO | p. 172 insuffisance rénale                                                                                                                                                  |
| <i>Hordeum vulgare</i> agg.       | Poaceae      | ant DIOS  | Gerste          | syst. DER | 136 gegen Scharfe, gegen Rauheit und Geschwüre der Luftröhre                                                                                                                |
| <i>Hordeum vulgare</i> agg.       | Poaceae      | ant DIOS  | Gerste          | top. DER  | 136 gekochte Schleim bildet Eiter                                                                                                                                           |
| <i>Hordeum vulgare</i> agg.       | Poaceae      | ant DIOS  | Gerste          | top. DER  | 136 reift es Drüsen                                                                                                                                                         |
| <i>Hordeum vulgare</i> agg.       | Poaceae      | ant DIOS  | Gerste          | top. DER  | 136 heilt es Aussatz                                                                                                                                                        |
| <i>Hordeum vulgare</i> agg.       | Poaceae      | ant DIOS  | Gerste          | top. DER  | zerteilt Eitergeschwüre und Geschwülste, es bringt ferner mit Pech, Harz und Taubenmist Verhärtungen zur Reife macht geschmeidig, treibt die Blähungen, ist dem Magen nicht |
| <i>Hordeum vulgare</i> agg.       | Poaceae      | ant DIOS  | Gerste          | syst. GAS | 136 zuträglich                                                                                                                                                              |
| <i>Hordeum vulgare</i> agg.       | Poaceae      | ant DIOS  | Gerste          | syst. GAS | 136 bereiten Graupen stellen den Bauch und lindern Entzündungen                                                                                                             |
| <i>Hordeum vulgare</i> agg.       | Poaceae      | ant DIOS  | Gerste          | top. GAS  | 136 dient es als Umschlag bei Aufblähen der Eingeweide                                                                                                                      |
| <i>Hordeum vulgare</i> agg.       | Poaceae      | ant DIOS  | Gerste          | top. GAS  | 136 stellt es den Bauchfluss                                                                                                                                                |
| <i>Hordeum vulgare</i> agg.       | Poaceae      | ant DIOS  | Gerste          | syst. GYN | 136 mit Fenchelsamen gekocht und geschlurft, die Milchabsonderung                                                                                                           |
| <i>Hordeum vulgare</i> agg.       | Poaceae      | ant DIOS  | Gerste          | top. n.d. | 136 Gelenkflüssen angebracht                                                                                                                                                |
| <i>Hordeum vulgare</i> agg.       | Poaceae      | ant DIOS  | Gerste          | top. NER  | 136 Mit Steinklee hilft es bei Kopf und Brustschmerzen                                                                                                                      |
| <i>Hordeum vulgare</i> agg.       | Poaceae      | ant DIOS  | Gerste          | syst. OTH | 136 reift die Odeme                                                                                                                                                         |
| <i>Hordeum vulgare</i> agg.       | Poaceae      | ant DIOS  | Gerste          | top. SKE  | 136 Podagraanschwellungen                                                                                                                                                   |
| <i>Hordeum vulgare</i> agg.       | Poaceae      | ant DIOS  | Gerste          | syst. URO | 136 treibt den Harn                                                                                                                                                         |
| <i>Hordeum vulgare</i> agg.       | Poaceae      | mon HvB   | Gerste          | top. DER  | 1-4 aber wer im Gesicht eine harte und rauhe Haut hat                                                                                                                       |
| <i>Hordeum vulgare</i> agg.       | Poaceae      | mon HvB   | Gerste          | top. n.d. | 1-4 und wenn der Kopf des Menschen krank ist                                                                                                                                |
| <i>Hordeum vulgare</i> agg.       | Poaceae      | mon HvB   | Gerste          | syst. OTH | 1-4 so krank ist, dass er kein Brot essen kann                                                                                                                              |
| <i>Hordeum vulgare</i> agg.       | Poaceae      | mon HvB   | Gerste          | top. TON  | 1-4 Aber der Kranke, der schon am ganzen Körper ermattet ist, erweicht mit bech, hartz un taubenkot vermischet allerley herte                                               |
| <i>Hordeum vulgare</i> agg.       | Poaceae      | ren LF    | Gerste          | top. DER  | /I - CCXLVII / CLXVI geschwulst                                                                                                                                             |
| <i>Hordeum vulgare</i> agg.       | Poaceae      | ren LF    | Gerste          | top. DER  | /I - CCXLVII / CLXVI zerteilet und verzert geschwulst und geschwaer                                                                                                         |
| <i>Hordeum vulgare</i> agg.       | Poaceae      | ren LF    | Gerste          | top. DER  | /I - CCXLVII / CLXVI vertreibt sie die rossmucken und dem angesicht                                                                                                         |
| <i>Hordeum vulgare</i> agg.       | Poaceae      | ren LF    | Gerste          | top. DER  | /I - CCXLVII / CLXVI aussetzen                                                                                                                                              |
| <i>Hordeum vulgare</i> agg.       | Poaceae      | ren LF    | Gerste          | top. DER  | /I - CCXLVII / CLXVI macht zeitig die kroepff                                                                                                                               |
| <i>Hordeum vulgare</i> agg.       | Poaceae      | ren LF    | Gerste          | top. GAS  | /I - CCXLVII / CLXVI vertreibt die bleest und wind im bauch                                                                                                                 |
| <i>Hordeum vulgare</i> agg.       | Poaceae      | ren LF    | Gerste          | top. GAS  | /I - CCXLVII / CLXVI stellt es den bauchfluss                                                                                                                               |
| <i>Hordeum vulgare</i> agg.       | Poaceae      | ren LF    | Gerste          | syst. GYN | /I - CCXLVII / CLXVI mehret und bringt den webern die versiegene milch wider                                                                                                |
| <i>Hordeum vulgare</i> agg.       | Poaceae      | ren LF    | Gerste          | top. n.d. | /I - CCXLVII / CLXVI über die Seiten gelegt legt es den Schmerzen derselbigen                                                                                               |
| <i>Hordeum vulgare</i> agg.       | Poaceae      | ren LF    | Gerste          | top. SKE  | /I - CCXLVII / CLXVI dem hitzigen podagra                                                                                                                                   |
| <i>Hordeum vulgare</i> agg.       | Poaceae      | ren LF    | Gerste          | top. SKE  | /I - CCXLVII / CLXVI zu den flüssen die in die gleich gon                                                                                                                   |
| <i>Hordeum vulgare</i> agg.       | Poaceae      | ren LF    | Gerste          | top. SKE  | /I - CCXLVII / CLXVI gut zu den verzuckten gildern                                                                                                                          |
| <i>Hordeum vulgare</i> agg.       | Poaceae      | s pop VOG | Gerste          | syst. TON | p. 665, 89 Stärkungsmittel, Kleinkindernahrung, Leberdiät                                                                                                                   |
| <i>Hyoscyamus niger</i> L.        | Solanaceae   | ant DIOS  | Bilsenkraut     | top. DER  | 299 angeschwollenen Hoden                                                                                                                                                   |
| <i>Hyoscyamus niger</i> L.        | Solanaceae   | ant DIOS  | Bilsenkraut     | syst. EAR | 299 gegen Ohrenschmerzen                                                                                                                                                    |
| <i>Hyoscyamus niger</i> L.        | Solanaceae   | ant DIOS  | Bilsenkraut     | syst. FEV | 299 heilen böartige Fieber                                                                                                                                                  |
| <i>Hyoscyamus niger</i> L.        | Solanaceae   | ant DIOS  | Bilsenkraut     | syst. GYN | 299 bei Fluss der Frauen und sonstigem Blutverlust                                                                                                                          |
| <i>Hyoscyamus niger</i> L.        | Solanaceae   | ant DIOS  | Bilsenkraut     | syst. NER | 299 schmerzstillenden Kollyrien                                                                                                                                             |
| <i>Hyoscyamus niger</i> L.        | Solanaceae   | ant DIOS  | Bilsenkraut     | syst. NER | 299 sowie gegen heftigen und heissen Fluss                                                                                                                                  |
| <i>Hyoscyamus niger</i> L.        | Solanaceae   | ant DIOS  | Bilsenkraut     | syst. NER | 299 Gebärmutterleiden                                                                                                                                                       |
| <i>Hyoscyamus niger</i> L.        | Solanaceae   | ant DIOS  | Bilsenkraut     | syst. NER | 299 Augen-, Fuss- und sonstige Entzündungen                                                                                                                                 |
| <i>Hyoscyamus niger</i> L.        | Solanaceae   | ant DIOS  | Bilsenkraut     | top. NER  | 299 schmerzstillenden Arzneien                                                                                                                                              |
| <i>Hyoscyamus niger</i> L.        | Solanaceae   | ant DIOS  | Bilsenkraut     | top. NER  | 299 und nach der Niederkunft entzündeten Brüsten                                                                                                                            |
| <i>Hyoscyamus niger</i> L.        | Solanaceae   | ant DIOS  | Bilsenkraut     | top. NER  | 299 bewirken sie gelinden Wahnsinn, der ein Geschwür im                                                                                                                     |
| <i>Hyoscyamus niger</i> L.        | Solanaceae   | ant DIOS  | Bilsenkraut     | svst. OTH | 299 Kolon hat, im Klystier beibringt, dieselbe Wirkung eintritt                                                                                                             |
| <i>Hyoscyamus niger</i> L.        | Solanaceae   | ant DIOS  | Bilsenkraut     | svst. RES | 299 Augen                                                                                                                                                                   |
| <i>Hyoscyamus niger</i> L.        | Solanaceae   | ant DIOS  | Bilsenkraut     | svst. SKE | 299 an Augen Mitteln                                                                                                                                                        |
| <i>Hyoscyamus niger</i> L.        | Solanaceae   | ant DIOS  | Bilsenkraut     | top. TEE  | 299 lindert als Mundspülwasser Zahnschmerzen                                                                                                                                |
| <i>Hyoscyamus niger</i> L.        | Solanaceae   | mon HvB   | Bilsenkraut     | top. DER  | 1-110 Aber wo Finnen im Menschen sind, so dass sein Fleisch geschwürig                                                                                                      |
| <i>Hyoscyamus niger</i> L.        | Solanaceae   | mon HvB   | Bilsenkraut     | top. DER  | 1-110 machen                                                                                                                                                                |
| <i>Hyoscyamus niger</i> L.        | Solanaceae   | mon HvB   | Bilsenkraut     | top. DER  | 1-110 Aber wo an einer Stelle der Glieder des Menschen zu grosse Hitze                                                                                                      |
| <i>Hyoscyamus niger</i> L.        | Solanaceae   | mon HvB   | Bilsenkraut     | top. DER  | 1-110 entsteht                                                                                                                                                              |
| <i>Hyoscyamus niger</i> L.        | Solanaceae   | mon MF    | Bilsenkraut     | top. OTH  | 1-110 Damit aber ein Betrunkenen wieder zu sich kommt, lege er                                                                                                              |
| <i>Hyoscyamus niger</i> L.        | Solanaceae   | mon MF    | Bilsenkraut     | top. ANT  | 61 vielerlei Plaster und Antidot und Gegengiften                                                                                                                            |
| <i>Hyoscyamus niger</i> L.        | Solanaceae   | mon MF    | Bilsenkraut     | top. DER  | 61 beliebige Geschwülste                                                                                                                                                    |
| <i>Hyoscyamus niger</i> L.        | Solanaceae   | mon MF    | Bilsenkraut     | top. EAR  | 61 tötet Ohrwürle und pflegt verschiedenartige Ohrenschmerzen zu                                                                                                            |
| <i>Hyoscyamus niger</i> L.        | Solanaceae   | mon MF    | Bilsenkraut     | top. EAR  | 61 lindern                                                                                                                                                                  |
| <i>Hyoscyamus niger</i> L.        | Solanaceae   | mon MF    | Bilsenkraut     | top. EYE  | 61 Leiden oft damit salbt                                                                                                                                                   |
| <i>Hyoscyamus niger</i> L.        | Solanaceae   | mon MF    | Bilsenkraut     | syst. GAS | 61 Blutspeinde damit geheilt werden können                                                                                                                                  |
| <i>Hyoscyamus niger</i> L.        | Solanaceae   | mon MF    | Bilsenkraut     | syst. GYN | 61 für Frauen nützlich, die einen Säftefluss aus der Gebärmutter                                                                                                            |
| <i>Hyoscyamus niger</i> L.        | Solanaceae   | mon MF    | Bilsenkraut     | top. GYN  | 61 erleiden                                                                                                                                                                 |
| <i>Hyoscyamus niger</i> L.        | Solanaceae   | mon MF    | Bilsenkraut     | top. GYN  | 61 geschwollene Brüste                                                                                                                                                      |
| <i>Hyoscyamus niger</i> L.        | Solanaceae   | mon MF    | Bilsenkraut     | top. SKE  | 61 fressgicht                                                                                                                                                               |
| <i>Hyoscyamus niger</i> L.        | Solanaceae   | mon MF    | Bilsenkraut     | top. TEE  | 61 selbst unmässigen Zahnschmerzen beruhigen                                                                                                                                |
| <i>Hyoscyamus niger</i> L.        | Solanaceae   | mon MF    | Bilsenkraut     | top. URO  | 61 geschwollene Hoden behandeln                                                                                                                                             |
| <i>Hyoscyamus niger</i> L.        | Solanaceae   | ren LF    | Bilsenkraut     | top. DER  | 1-110 CCXXVII / CCXXVIII trucken nieder und treiben hinder sich allerley geschwulst                                                                                         |
| <i>Hyoscyamus niger</i> L.        | Solanaceae   | ren LF    | Bilsenkraut     | top. EAR  | 1-110 CCXXVII / CCXXVIII legt und stilt die stich in den ohren und den schmerzen                                                                                            |
| <i>Hyoscyamus niger</i> L.        | Solanaceae   | ren LF    | Bilsenkraut     | top. EYE  | 1-110 CCXXVII / CCXXVIII hitzigen, treffenden und schmerzlichen augen                                                                                                       |
| <i>Hyoscyamus niger</i> L.        | Solanaceae   | ren LF    | Bilsenkraut     | top. GYN  | 1-110 CCXXVII / CCXXVIII stellen das bluten und übrige fliesen der frauen                                                                                                   |
| <i>Hyoscyamus niger</i> L.        | Solanaceae   | ren LF    | Bilsenkraut     | syst. NER | 1-110 CCXXVII / CCXXVIII bringt den schlaf                                                                                                                                  |
| <i>Hyoscyamus niger</i> L.        | Solanaceae   | ren LF    | Bilsenkraut     | top. NER  | 1-110 CCXXVII / CCXXVIII bringt den schlaf                                                                                                                                  |
| <i>Hyoscyamus niger</i> L.        | Solanaceae   | ren LF    | Bilsenkraut     | top. SKE  | 1-110 CCXXVII / CCXXVIII vertreiben sie die weetaagen der glieder, das podagra                                                                                              |
| <i>Hyoscyamus niger</i> L.        | Solanaceae   | ren LF    | Bilsenkraut     | top. TEE  | 1-110 CCXXVII / CCXXVIII stilt den grossen und unelidlichen schmerzen der zaen                                                                                              |
| <i>Hyoscyamus niger</i> L.        | Solanaceae   | s pop VAL | Bilsenkraut     | top. EAR  | p. 324 inflammation des oreilles                                                                                                                                            |
| <i>Hyoscyamus niger</i> L.        | Solanaceae   | s pop VAL | Bilsenkraut     | syst. GAS | p. 324 spasmes gastriques, oesophagiens, vésiculaires, intestinaux                                                                                                          |
| <i>Hyoscyamus niger</i> L.        | Solanaceae   | s pop VAL | Bilsenkraut     | top. GYN  | p. 324 mammitte                                                                                                                                                             |
| <i>Hyoscyamus niger</i> L.        | Solanaceae   | s pop VAL | Bilsenkraut     | syst. NER | p. 324 anxiouse, agitation des maladies mentales                                                                                                                            |
| <i>Hyoscyamus niger</i> L.        | Solanaceae   | s pop VAL | Bilsenkraut     | top. SKE  | p. 324 goutte, rhumatismes, contusions, entorses                                                                                                                            |
| <i>Hyoscyamus niger</i> L.        | Solanaceae   | s pop VAL | Bilsenkraut     | top. TEE  | p. 324 névralgies dentaires et autres                                                                                                                                       |
| <i>Hypericum perforatum</i> agg.  | Hypericaceae | ant DIOS  | Johanniskraut   | top. DER  | 210 gutes Mittel als Umschlag, bei Feuerbrandwunden                                                                                                                         |
| <i>Hypericum perforatum</i> agg.  | Hypericaceae | ant DIOS  | Johanniskraut   | syst. NER | 210 wirkt bei Ischias . . . denn sie führt viel                                                                                                                             |
| <i>Hypericum perforatum</i> agg.  | Hypericaceae | mon HvB   | Johanniskraut   | n.d. n.d. | 210 gallige Unreinigkeit ab                                                                                                                                                 |
| <i>Hypericum perforatum</i> agg.  | Hypericaceae | ren LF    | Johanniskraut   | top. DER  | 1-222 vernachlässigtes Krautlein ist                                                                                                                                        |
| <i>Hypericum perforatum</i> agg.  | Hypericaceae | ren LF    | Johanniskraut   | top. DER  | 1-222 faulen schaden und geschwaer                                                                                                                                          |
| <i>Hypericum perforatum</i> agg.  | Hypericaceae | ren LF    | Johanniskraut   | top. DER  | 1-222 CCXXVI / CCXXVIII heylet den brandt                                                                                                                                   |
| <i>Hypericum perforatum</i> agg.  | Hypericaceae | ren LF    | Johanniskraut   | syst. FEV | 1-222 CCXXVI / CCXXVIII vertreibt es das dreitägliche und viertägliche fieber                                                                                               |
| <i>Hypericum perforatum</i> agg.  | Hypericaceae | ren LF    | Johanniskraut   | syst. GYN | 1-222 CCXXVI / CCXXVIII bringt den frawn in zeit                                                                                                                            |
| <i>Hypericum perforatum</i> agg.  | Hypericaceae | ren LF    | Johanniskraut   | syst. SKE | 1-222 CCXXVI / CCXXVIII heylet das hüftwee                                                                                                                                  |
| <i>Hypericum perforatum</i> agg.  | Hypericaceae | ren LF    | Johanniskraut   | syst. URO | 1-222 CCXXVI / CCXXVIII treibt den harn                                                                                                                                     |
| <i>Hypericum perforatum</i> agg.  | Hypericaceae | ren LF    | Johanniskraut   | syst. URO | 1-222 CCXXVI / CCXXVIII stellt den bauchfluss und ist trefflich gut zu den blasenstein                                                                                      |
| <i>Hypericum perforatum</i> agg.  | Hypericaceae | s pop BVA | Johanniskraut   | syst. GAS | p. 111 Gallenstauung, Appetitlosigkeit                                                                                                                                      |
| <i>Hypericum perforatum</i> agg.  | Hypericaceae | s pop BVA | Johanniskraut   | syst. GAS | p. 111 Gallenstauung, Appetitlosigkeit                                                                                                                                      |
| <i>Hypericum perforatum</i> agg.  | Hypericaceae | s pop BVA | Johanniskraut   | syst. GYN | p. 111 Gebärmutter Schmerzen                                                                                                                                                |
| <i>Hypericum perforatum</i> agg.  | Hypericaceae | s pop BVA | Johanniskraut   | syst. GYN | p. 111 Gebärmutter Schmerzen                                                                                                                                                |
| <i>Hypericum perforatum</i> agg.  | Hypericaceae | s pop BVA | Johanniskraut   | syst. HUM | p. 111 Blutreinigung, Bluterfrischung                                                                                                                                       |
| <i>Hypericum perforatum</i> agg.  | Hypericaceae | s pop BVA | Johanniskraut   | syst. HUM | p. 111 Blutreinigung, Bluterfrischung                                                                                                                                       |
| <i>Hypericum perforatum</i> agg.  | Hypericaceae | s pop BVA | Johanniskraut   | syst. NER | p. 111 Nervosität, nervöser Unruhe, nervöser Erschöpfung, geistiger Überanstrengung, Schlaflosigkeit, Neuralgie, Ischias, Hexenschuss                                       |



|                                  |              |           |               |           |                  |                                                                                                                                                                   |
|----------------------------------|--------------|-----------|---------------|-----------|------------------|-------------------------------------------------------------------------------------------------------------------------------------------------------------------|
|                                  |              |           |               |           |                  | Nervosität, nervöser Unruhe, nervöser Erschöpfung, geistiger Überanstrengung, Schlaflosigkeit, Neuralgie, Ischias,                                                |
| <i>Hypericum perforatum</i> agg. | Hypericaceae | s pop BVA | Johanniskraut | syst_NER  | p. 111           | Hexenschuss                                                                                                                                                       |
| <i>Hypericum perforatum</i> agg. | Hypericaceae | s pop BVA | Johanniskraut | syst_SKE  | p. 111           | Hexenschuss                                                                                                                                                       |
| <i>Hypericum perforatum</i> agg. | Hypericaceae | s pop BVA | Johanniskraut | syst_SKE  | p. 111           | Hexenschuss                                                                                                                                                       |
| <i>Hypericum perforatum</i> agg. | Hypericaceae | s pop BVA | Johanniskraut | top_SKE   | p. 111           | Blutergüsse, Quetschungen                                                                                                                                         |
| <i>Hypericum perforatum</i> agg. | Hypericaceae | s pop JK  | Johanniskraut | top_DER   | p. 379           | Schürffungen, Insektenstiche                                                                                                                                      |
| <i>Hypericum perforatum</i> agg. | Hypericaceae | s pop JK  | Johanniskraut | syst_GAS  | p. 379           | Gelbsucht                                                                                                                                                         |
| <i>Hypericum perforatum</i> agg. | Hypericaceae | s pop JK  | Johanniskraut | syst_RES  | p. 379           | Lungenentzündung, Brustfellentzündung, Grippe                                                                                                                     |
| <i>Hypericum perforatum</i> agg. | Hypericaceae | s pop JK  | Johanniskraut | syst_URO  | p. 379           | Niere, Blase, Blennorrhoe, Blasenkatarrh                                                                                                                          |
| <i>Hypericum perforatum</i> agg. | Hypericaceae | s pop KN  | Johanniskraut | syst_GAS  | p. 475           | Gasbildung, Verstopfung, Leberstauung                                                                                                                             |
| <i>Hypericum perforatum</i> agg. | Hypericaceae | s pop KN  | Johanniskraut | syst_GAS  | p. 475           | Kopfleiden, die von wässrigen Stoffen oder Verschleimung im Kopfe                                                                                                 |
| <i>Hypericum perforatum</i> agg. | Hypericaceae | s pop KN  | Johanniskraut | syst_GAS  | p. 475           | herrühren, leicht Verschleimung von Brust und Lunge                                                                                                               |
| <i>Hypericum perforatum</i> agg. | Hypericaceae | s pop KN  | Johanniskraut | syst_URO  | p. 475           | Bettwärmer                                                                                                                                                        |
| <i>Hypericum perforatum</i> agg. | Hypericaceae | s pop MT  | Johanniskraut | syst_GAS  | p. 25            | Durchfall                                                                                                                                                         |
| <i>Hypericum perforatum</i> agg. | Hypericaceae | s pop MT  | Johanniskraut | syst_GYN  | p. 25            | Unregelmäßigkeiten der monatl. Periode                                                                                                                            |
| <i>Hypericum perforatum</i> agg. | Hypericaceae | s pop MT  | Johanniskraut | syst_NER  | p. 25            | Nervenerkrankungen und nervösen Beschwerden                                                                                                                       |
| <i>Hypericum perforatum</i> agg. | Hypericaceae | s pop MT  | Johanniskraut | top_NER   | p. 25            | Nervenschmerzen, Nervenerkrankungen usw.                                                                                                                          |
| <i>Hypericum perforatum</i> agg. | Hypericaceae | s pop MT  | Johanniskraut | syst_SKE  | p. 25            | Stosserkrankungen überheben                                                                                                                                       |
| <i>Hypericum perforatum</i> agg. | Hypericaceae | s pop UB  | Johanniskraut | top_DER   | p. 337           | Neurodermitis                                                                                                                                                     |
| <i>Hypericum perforatum</i> agg. | Hypericaceae | s pop UB  | Johanniskraut | syst_GAS  | p. 124           | Durchfall                                                                                                                                                         |
| <i>Hypericum perforatum</i> agg. | Hypericaceae | s pop UB  | Johanniskraut | syst_NER  | p. 428           | depressive Verstimmung und Ängste                                                                                                                                 |
| <i>Hypericum perforatum</i> agg. | Hypericaceae | s pop UB  | Johanniskraut | syst_NER  | p. 428           | depressive Verstimmung und Ängste                                                                                                                                 |
| <i>Hypericum perforatum</i> agg. | Hypericaceae | s pop UB  | Johanniskraut | syst_NER  | p. 428           | depressive Verstimmung und Ängste                                                                                                                                 |
| <i>Hypericum perforatum</i> agg. | Hypericaceae | s pop UB  | Johanniskraut | syst_NER  | p. 428           | depressive Verstimmung und Ängste                                                                                                                                 |
| <i>Hypericum perforatum</i> agg. | Hypericaceae | s pop UB  | Johanniskraut | top_SKE   | p. 290           | degenerativen Rheumatischen Erkrankungen                                                                                                                          |
| <i>Hypericum perforatum</i> agg. | Hypericaceae | s pop UB  | Johanniskraut | top_SKE   | p. 323           | Verstauchungen, Blutergüssen, Quetschungen                                                                                                                        |
| <i>Hypericum perforatum</i> agg. | Hypericaceae | s pop WI  | Johanniskraut | syst_SKE  | p. 310           | Volksmedizin: Rheumatismus und Gicht                                                                                                                              |
| <i>Hypericum perforatum</i> agg. | Hypericaceae | sci EMA   | Johanniskraut | top_DER   | IMPC/745582/2009 | Traditional herbal medicinal product for the symptomatic treatment of minor inflammations of the skin (such as sunburn) and as an aid in healing of minor wounds. |
| <i>Hypericum perforatum</i> agg. | Hypericaceae | sci EMA   | Johanniskraut | top_DER   | IMPC/745582/2009 | Traditional herbal medicinal product for the symptomatic treatment of minor inflammations of the skin (such as sunburn) and as an aid in healing of minor wounds. |
| <i>Hypericum perforatum</i> agg. | Hypericaceae | sci EMA   | Johanniskraut | top_DER   | IMPC/745582/2009 | Traditional herbal medicinal product for the symptomatic treatment of minor inflammations of the skin (such as sunburn) and as an aid in healing of minor wounds. |
| <i>Hypericum perforatum</i> agg. | Hypericaceae | sci EMA   | Johanniskraut | top_DER   | IMPC/745582/2009 | Traditional herbal medicinal product for the symptomatic treatment of minor inflammations of the skin (such as sunburn) and as an aid in healing of minor wounds. |
| <i>Hypericum perforatum</i> agg. | Hypericaceae | sci EMA   | Johanniskraut | syst_GAS  | IMPC/745582/2009 | Traditional herbal medicinal product for the symptomatic relief of mild gastrointestinal discomfort.                                                              |
| <i>Hypericum perforatum</i> agg. | Hypericaceae | sci EMA   | Johanniskraut | syst_NER  | IMPC/101304/2008 | Well-established-use: Herbal medicinal product for the treatment of mild to moderate depressive episodes (according to ICD-10).                                   |
| <i>Hypericum perforatum</i> agg. | Hypericaceae | sci EMA   | Johanniskraut | syst_NER  | IMPC/745582/2009 | Traditional herbal medicinal product for the relief of temporary mental exhaustion.                                                                               |
| <i>Hypericum perforatum</i> agg. | Hypericaceae | sci EMA   | Johanniskraut | syst_NER  | IMPC/745582/2009 | Traditional herbal medicinal product for the relief of temporary mental exhaustion.                                                                               |
| <i>Hypericum perforatum</i> agg. | Hypericaceae | sci EMA   | Johanniskraut | syst_NER  | IMPC/745582/2009 | Traditional herbal medicinal product for the relief of temporary mental exhaustion.                                                                               |
| <i>Hypericum perforatum</i> agg. | Hypericaceae | sci EMA   | Johanniskraut | syst_NER  | IMPC/745582/2009 | Traditional herbal medicinal product for the relief of temporary mental exhaustion.                                                                               |
| <i>Hypericum perforatum</i> agg. | Hypericaceae | sci EMA   | Johanniskraut | syst_NER  | IMPC/745582/2009 | Traditional herbal medicinal product for the relief of temporary mental exhaustion.                                                                               |
| <i>Hypericum perforatum</i> agg. | Hypericaceae | sci EMA   | Johanniskraut | syst_NER  | IMPC/745582/2009 | Traditional herbal medicinal product for the relief of temporary mental exhaustion.                                                                               |
| <i>Hypericum perforatum</i> agg. | Hypericaceae | sci EMA   | Johanniskraut | syst_NER  | IMPC/745582/2009 | Traditional herbal medicinal product for the relief of temporary mental exhaustion.                                                                               |
| <i>Hypericum perforatum</i> agg. | Hypericaceae | sci EMA   | Johanniskraut | syst_NER  | IMPC/745582/2009 | Traditional herbal medicinal product for the relief of temporary mental exhaustion.                                                                               |
| <i>Inula helenium</i> L.         | Asteraceae   | ant DIOS  | Alant         | syst_ANT  | 77               | gegen den Biss giftiger Tiere                                                                                                                                     |
| <i>Inula helenium</i> L.         | Asteraceae   | ant DIOS  | Alant         | syst_GAS  | 77               | Krämpfe                                                                                                                                                           |
| <i>Inula helenium</i> L.         | Asteraceae   | ant DIOS  | Alant         | syst_GYN  | 77               | treibt den Urin und die Menstruation                                                                                                                              |
| <i>Inula helenium</i> L.         | Asteraceae   | ant DIOS  | Alant         | syst_GYN  | 77               | treibt den Urin und die Menstruation                                                                                                                              |
| <i>Inula helenium</i> L.         | Asteraceae   | ant DIOS  | Alant         | syst_NER  | 77               | inners Natur                                                                                                                                                      |
| <i>Inula helenium</i> L.         | Asteraceae   | ant DIOS  | Alant         | top_NER   | 77               | Ischias Leidenden aufgelegt                                                                                                                                       |
| <i>Inula helenium</i> L.         | Asteraceae   | ant DIOS  | Alant         | syst_OTH  | 77               | Zerstoßen und genossen hilft sie denen, die an Blutsturz leiden                                                                                                   |
| <i>Inula helenium</i> L.         | Asteraceae   | ant DIOS  | Alant         | syst_URO  | 77               | treibt den Urin [und die Menstruation]                                                                                                                            |
| <i>Inula helenium</i> L.         | Asteraceae   | mon HvB   | Alant         | syst_EYE  | 1-95             | reinigt die Augen                                                                                                                                                 |
| <i>Inula helenium</i> L.         | Asteraceae   | mon HvB   | Alant         | syst_NER  | 1-95             | unterdrückt Migräne                                                                                                                                               |
| <i>Inula helenium</i> L.         | Asteraceae   | mon HvB   | Alant         | syst_RES  | 1-95             | Schmerzen in der Lunge                                                                                                                                            |
| <i>Inula helenium</i> L.         | Asteraceae   | mon MF    | Alant         | syst_GAS  | 44               | verstopften Bauch erweichen                                                                                                                                       |
| <i>Inula helenium</i> L.         | Asteraceae   | mon MF    | Alant         | syst_GYN  | 44               | sorgt für geordneten Monatsfluss, wirkt abtreibend                                                                                                                |
| <i>Inula helenium</i> L.         | Asteraceae   | mon MF    | Alant         | syst_RES  | 44               | beschwichtigt den Husten und heilt Atemnot                                                                                                                        |
| <i>Inula helenium</i> L.         | Asteraceae   | mon MF    | Alant         | syst_SKE  | 44               | Leistenbruch zuverlässig von Nutzen sein                                                                                                                          |
| <i>Inula helenium</i> L.         | Asteraceae   | mon MF    | Alant         | top_SKE   | 44               | vertreibt Hüftgicht                                                                                                                                               |
| <i>Inula helenium</i> L.         | Asteraceae   | mon MF    | Alant         | syst_URO  | 44               | wirkt harntreibend                                                                                                                                                |
| <i>Inula helenium</i> L.         | Asteraceae   | mon MF    | Alant         | top_URO   | 44               | nützt den Nierenleidenden                                                                                                                                         |
| <i>Inula helenium</i> L.         | Asteraceae   | ren LF    | Alant         | syst_ANT  | CXXXIII / LXXXIX | für das aufflaen von biss der giftigen thier                                                                                                                      |
| <i>Inula helenium</i> L.         | Asteraceae   | ren LF    | Alant         | syst_GAS  | CXXXIII / LXXXIX | ist dem magen nützlich                                                                                                                                            |
| <i>Inula helenium</i> L.         | Asteraceae   | ren LF    | Alant         | syst_GYN  | CXXXIII / LXXXIX | bringt den frauen ir bloodigkeit                                                                                                                                  |
| <i>Inula helenium</i> L.         | Asteraceae   | ren LF    | Alant         | syst_GYN  | CXXXIII / LXXXIX | dienslich denen so husten und keichen, inwendig gebrochen sind                                                                                                    |
| <i>Inula helenium</i> L.         | Asteraceae   | ren LF    | Alant         | syst_RES  | CXXXIII / LXXXIX | und blut speien                                                                                                                                                   |
| <i>Inula helenium</i> L.         | Asteraceae   | ren LF    | Alant         | top_SKE   | CXXXIII / LXXXIX | lindert das hüftwee                                                                                                                                               |
| <i>Inula helenium</i> L.         | Asteraceae   | ren LF    | Alant         | top_SKE   | CXXXIII / LXXXIX | verzet es die geschwulst so sch von kalter feuchtigkeit erhebt                                                                                                    |
| <i>Inula helenium</i> L.         | Asteraceae   | ren LF    | Alant         | top_SKE   | CXXXIII / LXXXIX | haben                                                                                                                                                             |
| <i>Inula helenium</i> L.         | Asteraceae   | ren LF    | Alant         | syst_URO  | CXXXIII / LXXXIX | treibt den harn                                                                                                                                                   |
| <i>Inula helenium</i> L.         | Asteraceae   | s pop JK  | Alant         | syst_RES  | p. 322           | Katarrh, Lungenverschleimung, Asthma                                                                                                                              |
| <i>Inula helenium</i> L.         | Asteraceae   | s pop WI  | Alant         | top_DER   | p. 285           | Volksmedizin: Exantheme und infektiösen Hauterkrankungen                                                                                                          |
| <i>Inula helenium</i> L.         | Asteraceae   | s pop WI  | Alant         | syst_GAS  | p. 285           | Volksmedizin: Stomachikum, Karminativum, Cholagogum                                                                                                               |
| <i>Inula helenium</i> L.         | Asteraceae   | s pop WI  | Alant         | syst_GAS  | p. 285           | Volksmedizin: Anthelmintikum                                                                                                                                      |
| <i>Inula helenium</i> L.         | Asteraceae   | s pop WI  | Alant         | syst_URO  | p. 285           | Volksmedizin: Infektionen der ableitenden Harnwege                                                                                                                |
| <i>Inula helenium</i> L.         | Asteraceae   | sci WI    | Alant         | syst_RES  | p. 285           | Expektorans                                                                                                                                                       |
| <i>Iris germanica</i> agg.       | Iridaceae    | ant DIOS  | Schwertlilie  | syst_ANT  | 1/68             | benennen einem verderbenbringenden Mittel die Kraft, wenn sie mit Honigmeth genossen werden                                                                       |
| <i>Iris germanica</i> agg.       | Iridaceae    | ant DIOS  | Schwertlilie  | syst_ANT  | 1/68             | gebissen sind                                                                                                                                                     |
| <i>Iris germanica</i> agg.       | Iridaceae    | ant DIOS  | Schwertlilie  | top_DER   | 1/68             | und Leberflecken. Sie füllen die                                                                                                                                  |
| <i>Iris germanica</i> agg.       | Iridaceae    | ant DIOS  | Schwertlilie  | top_DER   | 1/68             | Sie erweichen auch Drüsen und alte Verhärtungen, wenn sie                                                                                                         |
| <i>Iris germanica</i> agg.       | Iridaceae    | ant DIOS  | Schwertlilie  | syst_FEV  | 1/68             | gekocht umgeschlagen worden                                                                                                                                       |
| <i>Iris germanica</i> agg.       | Iridaceae    | ant DIOS  | Schwertlilie  | syst_GYN  | 1/68             | die von Kälte und Frostschaern ergriffen sind                                                                                                                     |
| <i>Iris germanica</i> agg.       | Iridaceae    | ant DIOS  | Schwertlilie  | syst_GYN  | 1/68             | Mit Wein genommen, befördern sie die Katamenien,                                                                                                                  |
| <i>Iris germanica</i> agg.       | Iridaceae    | ant DIOS  | Schwertlilie  | syst_GYN  | 1/68             | auch ist die Abkochung davon zu Blähungen für Frauen sehr                                                                                                         |
| <i>Iris germanica</i> agg.       | Iridaceae    | ant DIOS  | Schwertlilie  | syst_GYN  | 1/68             | geeignet, indem sie die Stellen erweicht und öffnet                                                                                                               |
| <i>Iris germanica</i> agg.       | Iridaceae    | ant DIOS  | Schwertlilie  | syst_GYN  | 1/68             | Mit Honig als Paste eingeführt, ziehen sie den Embryo heraus                                                                                                      |
| <i>Iris germanica</i> agg.       | Iridaceae    | ant DIOS  | Schwertlilie  | top_n.d.  | 1/68             | Endlich werden sie auch den Zapfen, Pfästern und Salben                                                                                                           |
| <i>Iris germanica</i> agg.       | Iridaceae    | ant DIOS  | Schwertlilie  | n.d. n.d. | 1/68             | zugemischt und sind zu Vielem nützlich                                                                                                                            |
| <i>Iris germanica</i> agg.       | Iridaceae    | ant DIOS  | Schwertlilie  | n.d. n.d. | 1/68             | verursachen Tränen und heilen Leibschnitten                                                                                                                       |
| <i>Iris germanica</i> agg.       | Iridaceae    | ant DIOS  | Schwertlilie  | n.d. NER  | 1/68             | Sie sind aber auch schlafmachend                                                                                                                                  |
| <i>Iris germanica</i> agg.       | Iridaceae    | ant DIOS  | Schwertlilie  | syst_NER  | 1/68             | denen, die an Krämpfen leiden                                                                                                                                     |
| <i>Iris germanica</i> agg.       | Iridaceae    | ant DIOS  | Schwertlilie  | syst_NER  | 1/68             | Ferner sind sie wohltuend bei Kopfschmerzen wenn sie mit Essig                                                                                                    |
| <i>Iris germanica</i> agg.       | Iridaceae    | ant DIOS  | Schwertlilie  | top_NER   | 1/68             | und                                                                                                                                                               |
| <i>Iris germanica</i> agg.       | Iridaceae    | ant DIOS  | Schwertlilie  | syst_OTH  | 1/68             | Milzschmerzen                                                                                                                                                     |
| <i>Iris germanica</i> agg.       | Iridaceae    | ant DIOS  | Schwertlilie  | n.d. RES  | 1/68             | verdünnen die schwer auszuwerfenden Flüssigkeiten                                                                                                                 |
| <i>Iris germanica</i> agg.       | Iridaceae    | ant DIOS  | Schwertlilie  | syst_URO  | 1/68             | denen, die an Samenfluss leiden                                                                                                                                   |
| <i>Iris germanica</i> agg.       | Iridaceae    | mon HvB   | Schwertlilie  | top_DER   | 1-118            | Und jenen, der die kleine Krätze hat, den salbe of mit dieser Salbe                                                                                               |
| <i>Iris germanica</i> agg.       | Iridaceae    | mon HvB   | Schwertlilie  | top_DER   | 1-118            | Und wer im Gesicht harte Haut hat wie Rinde, oder wer dort beulig                                                                                                 |
| <i>Iris germanica</i> agg.       | Iridaceae    | mon HvB   | Schwertlilie  | top_DER   | 1-118            | ist                                                                                                                                                               |
| <i>Iris germanica</i> agg.       | Iridaceae    | mon HvB   | Schwertlilie  | top_DER   | 1-118            | und gegen frische Lepra                                                                                                                                           |
| <i>Iris germanica</i> agg.       | Iridaceae    | mon HvB   | Schwertlilie  | syst_GAS  | 1-118            | und gib es warm so jenen zu trinken, der einen Stein hat                                                                                                          |
| <i>Iris germanica</i> agg.       | Iridaceae    | mon HvB   | Schwertlilie  | syst_NER  | 1-118            | und gib sie diesem Verrückten, das heisst Hirnwütigen oft zu essen                                                                                                |

|                                |              |       |      |              |      |      |                                                                                                                                                                                                |
|--------------------------------|--------------|-------|------|--------------|------|------|------------------------------------------------------------------------------------------------------------------------------------------------------------------------------------------------|
| <i>Iris germanica</i> agg.     | Iridaceae    | mon   | HvB  | Schwertlilie | top  | NER  | umwinden den Kopf eines Verrückten und dessen der hinwütig ist<br>1-118 so warm, und binde ein Tuch darüber, damit er schläft<br>und wer von Schwierigkeiten des Harmlassens zusammengeschnürt |
| <i>Iris germanica</i> agg.     | Iridaceae    | mon   | HvB  | Schwertlilie | syst | URO  | 1-118 wrd, in dem erweicht er den Stein                                                                                                                                                        |
| <i>Iris germanica</i> agg.     | Iridaceae    | mon   | MF   | Schwertlilie | syst | ANT  | 43 falls einer Gift eingenommen hat, solches entschärfen                                                                                                                                       |
| <i>Iris germanica</i> agg.     | Iridaceae    | mon   | MF   | Schwertlilie | top  | DER  | 43 Fistein heilt                                                                                                                                                                               |
| <i>Iris germanica</i> agg.     | Iridaceae    | mon   | MF   | Schwertlilie | top  | DER  | 43 trocknet nässende Wunden, lässt Knochen wieder wachsen                                                                                                                                      |
| <i>Iris germanica</i> agg.     | Iridaceae    | mon   | MF   | Schwertlilie | top  | DER  | 43 reinigt das Angesicht vom Leberfleck und vertreibt auch den Grind                                                                                                                           |
| <i>Iris germanica</i> agg.     | Iridaceae    | mon   | MF   | Schwertlilie | syst | GAS  | 43 stillt das Bauchgrimmen                                                                                                                                                                     |
| <i>Iris germanica</i> agg.     | Iridaceae    | mon   | MF   | Schwertlilie | syst | GYN  | 43 sorgt für geordneten Monatsfluss                                                                                                                                                            |
| <i>Iris germanica</i> agg.     | Iridaceae    | mon   | MF   | Schwertlilie | top  | GYN  | 43 schnell die Nachgeburt austreibt                                                                                                                                                            |
| <i>Iris germanica</i> agg.     | Iridaceae    | mon   | MF   | Schwertlilie | top  | GYN  | 43 erweicht Verhärtungen in der Gebärmutter<br>wenn Eiter in der Herzgegend versteckt, Herz und Brust schädigt,                                                                                |
| <i>Iris germanica</i> agg.     | Iridaceae    | mon   | MF   | Schwertlilie | syst | HUM  | 43 ... Und treibt hiermit den Eiter aus                                                                                                                                                        |
| <i>Iris germanica</i> agg.     | Iridaceae    | mon   | MF   | Schwertlilie | syst | NER  | 43 führen Schlummer herbei                                                                                                                                                                     |
| <i>Iris germanica</i> agg.     | Iridaceae    | mon   | MF   | Schwertlilie | syst | OTH  | 43 Milzsüchtige                                                                                                                                                                                |
| <i>Iris germanica</i> agg.     | Iridaceae    | mon   | MF   | Schwertlilie | syst | RES  | 43 stillen den Husten                                                                                                                                                                          |
| <i>Iris germanica</i> agg.     | Iridaceae    | mon   | MF   | Schwertlilie | syst | SKE  | 43 verkrüppelten oder durch Kälte verkrampften Gliedern helfen                                                                                                                                 |
| <i>Iris germanica</i> agg.     | Iridaceae    | mon   | MF   | Schwertlilie | top  | SKE  | 43 Huftsichtschmerz auf tun                                                                                                                                                                    |
| <i>Iris germanica</i> agg.     | Iridaceae    | ren   | LF   | Schwertlilie | syst | ANT  | CLXXVIII / CXIX denen so von giftigen thieren gebissen sind                                                                                                                                    |
| <i>Iris germanica</i> agg.     | Iridaceae    | ren   | LF   | Schwertlilie | top  | DER  | CLXXVIII / CXIX reinigen sie die unreinen wunden, heylen die fistein                                                                                                                           |
| <i>Iris germanica</i> agg.     | Iridaceae    | ren   | LF   | Schwertlilie | top  | DER  | CLXXVIII / CXIX runzel und klunse (?) oder spalt des hindern                                                                                                                                   |
| <i>Iris germanica</i> agg.     | Iridaceae    | ren   | LF   | Schwertlilie | syst | FEV  | CLXXVIII / CXIX denen so erkaltet sind undnd des frosts warten im feber                                                                                                                        |
| <i>Iris germanica</i> agg.     | Iridaceae    | ren   | LF   | Schwertlilie | syst | GAS  | CLXXVIII / CXIX stillen das bauchgrimmen                                                                                                                                                       |
| <i>Iris germanica</i> agg.     | Iridaceae    | ren   | LF   | Schwertlilie | syst | GYN  | CLXXVIII / CXIX bringen den frauen ihre zeit                                                                                                                                                   |
| <i>Iris germanica</i> agg.     | Iridaceae    | ren   | LF   | Schwertlilie | top  | GYN  | CLXXVIII / CXIX baeuung der verhetten muter                                                                                                                                                    |
| <i>Iris germanica</i> agg.     | Iridaceae    | ren   | LF   | Schwertlilie | syst | NER  | CLXXVIII / CXIX bringen ruw und machen schlafen                                                                                                                                                |
| <i>Iris germanica</i> agg.     | Iridaceae    | ren   | LF   | Schwertlilie | top  | NER  | CLXXVIII / CXIX lindert sie den schmerzen des haupts                                                                                                                                           |
| <i>Iris germanica</i> agg.     | Iridaceae    | ren   | LF   | Schwertlilie | syst | OTH  | CLXXVIII / CXIX milzsüchtigen                                                                                                                                                                  |
| <i>Iris germanica</i> agg.     | Iridaceae    | ren   | LF   | Schwertlilie | syst | RES  | CLXXVIII / CXIX sind gut zu dem husten                                                                                                                                                         |
| <i>Iris germanica</i> agg.     | Iridaceae    | ren   | LF   | Schwertlilie | top  | RES  | CLXXVIII / CXIX macht sie guten atem                                                                                                                                                           |
| <i>Iris germanica</i> agg.     | Iridaceae    | ren   | LF   | Schwertlilie | top  | SKE  | CLXXVIII / CXIX übergelegt, zeucht si heraus die gebrochenen bei<br>clystier denen so das hüftwee haben, mit harz vermengt ... Legt                                                            |
| <i>Iris germanica</i> agg.     | Iridaceae    | ren   | LF   | Schwertlilie | top  | SKE  | CLXXVIII / CXIX sie den schmerzen der flachsaden (?) lenden und hüften                                                                                                                         |
| <i>Iris germanica</i> agg.     | Iridaceae    | ren   | LF   | Schwertlilie | top  | TEE  | CLXXVIII / CXIX die zan weetagen haben                                                                                                                                                         |
| <i>Iris germanica</i> agg.     | Iridaceae    | ren   | LF   | Schwertlilie | syst | URO  | CLXXVIII / CXIX treibt aus die wassersucht, den lendenstein und den harn                                                                                                                       |
| <i>Iris germanica</i> agg.     | Iridaceae    | ren   | LF   | Schwertlilie | syst | URO  | CLXXVIII / CXIX denen so den samen mit künden behalten                                                                                                                                         |
| <i>Iris germanica</i> agg.     | Iridaceae    | s pop | WI   | Schwertlilie | syst | RES  | p. 317 Volksmedizin: Expektorans und Muzilaginosum                                                                                                                                             |
| <i>Juglans regia</i> L.        | Juglandaceae | ant   | DIOS | Walnuss      | syst | ANT  | Gegenmittel für tödliche Gifte, wenn sie vorher oder nachher mit                                                                                                                               |
| <i>Juglans regia</i> L.        | Juglandaceae | ant   | DIOS | Walnuss      | top  | ANT  | 79 Feigen und Raute                                                                                                                                                                            |
| <i>Juglans regia</i> L.        | Juglandaceae | ant   | DIOS | Walnuss      | top  | ANT  | Mit Zwiebeln, Salz und Honig wirken sie beim Biss des Hundes und                                                                                                                               |
| <i>Juglans regia</i> L.        | Juglandaceae | ant   | DIOS | Walnuss      | top  | DER  | 79 Menschen                                                                                                                                                                                    |
| <i>Juglans regia</i> L.        | Juglandaceae | ant   | DIOS | Walnuss      | top  | DER  | 79 zu vertreiben                                                                                                                                                                               |
| <i>Juglans regia</i> L.        | Juglandaceae | ant   | DIOS | Walnuss      | top  | DER  | 79 heilen Gangrän, Karbunkeln, Gaisaugen und Fuchskrankheit; Als                                                                                                                               |
| <i>Juglans regia</i> L.        | Juglandaceae | ant   | DIOS | Walnuss      | top  | DER  | 79 Umschlag besetigen sie auch blutunterlaufene Stellen<br>als Um- schlag auf entzündete (schwärende) Brüste, auf                                                                              |
| <i>Juglans regia</i> L.        | Juglandaceae | ant   | DIOS | Walnuss      | top  | DER  | 79 Ablagerungen (Abszesse)                                                                                                                                                                     |
| <i>Juglans regia</i> L.        | Juglandaceae | ant   | DIOS | Walnuss      | top  | DER  | 79 Wein und Öl zerriebene Schale bewirkt als Pomade bei Kindern                                                                                                                                |
| <i>Juglans regia</i> L.        | Juglandaceae | ant   | DIOS | Walnuss      | top  | DER  | 79 schönes Haar und stärkt das nach der Fuchskrankheit ausfallende                                                                                                                             |
| <i>Juglans regia</i> L.        | Juglandaceae | ant   | DIOS | Walnuss      | top  | EAR  | 79 hilft es gegen Ohrenschmerzen, Ohrensausen und Ohrenklingen                                                                                                                                 |
| <i>Juglans regia</i> L.        | Juglandaceae | ant   | DIOS | Walnuss      | syst | GAS  | 79 Reiblich und weichen treiben sie den Bandwurm aus                                                                                                                                           |
| <i>Juglans regia</i> L.        | Juglandaceae | ant   | DIOS | Walnuss      | syst | GAS  | 79 auf den Nabel gelegt, lindern sie Leibschniden                                                                                                                                              |
| <i>Juglans regia</i> L.        | Juglandaceae | ant   | DIOS | Walnuss      | top  | GYN  | 79 Auch die Menstruation stärkt ihr wert                                                                                                                                                       |
| <i>Juglans regia</i> L.        | Juglandaceae | ant   | DIOS | Walnuss      | syst | HUM  | 79 auch den Bauch zu reiben, dem Magen ist es nicht zuträglich<br>sind als Speise dazu dienlich, um bei dem Nuchternen Brechen zu                                                              |
| <i>Juglans regia</i> L.        | Juglandaceae | ant   | DIOS | Walnuss      | syst | HUM  | 79 erregen                                                                                                                                                                                     |
| <i>Juglans regia</i> L.        | Juglandaceae | ant   | DIOS | Walnuss      | syst | OTH  | sind genossen schwer zu verdauen, dem Magen schädlich, sie                                                                                                                                     |
| <i>Juglans regia</i> L.        | Juglandaceae | ant   | DIOS | Walnuss      | top  | SKE  | 79 machen Galle, Kopfschmerzen und sind denen, die an Husten                                                                                                                                   |
| <i>Juglans regia</i> L.        | Juglandaceae | ant   | DIOS | Walnuss      | top  | SKE  | 79 und Verrenkungen gelegt                                                                                                                                                                     |
| <i>Juglans regia</i> L.        | Juglandaceae | mon   | HvB  | Walnuss      | top  | DER  | 3-4 Würmer in ihm wachsen [...] Lepra ... Salbe                                                                                                                                                |
| <i>Juglans regia</i> L.        | Juglandaceae | mon   | HvB  | Walnuss      | top  | DER  | 3-4 Kopfg grind                                                                                                                                                                                |
| <i>Juglans regia</i> L.        | Juglandaceae | mon   | HvB  | Walnuss      | syst | GAS  | 3-4 Würmer in deinem Magen                                                                                                                                                                     |
| <i>Juglans regia</i> L.        | Juglandaceae | mon   | HvB  | Walnuss      | syst | HUM  | 3-4 wer viel Schleim in sich hat                                                                                                                                                               |
| <i>Juglans regia</i> L.        | Juglandaceae | mon   | HvB  | Walnuss      | top  | SKE  | 3-4 Gicht, nehme die Erde, die um die Wurzel eines Baumes liegt                                                                                                                                |
| <i>Juglans regia</i> L.        | Juglandaceae | ren   | LF   | Walnuss      | syst | ANT  | CCXIII / CXLIJ welcher speien will, widerstreben sie allem tödlichen gift                                                                                                                      |
| <i>Juglans regia</i> L.        | Juglandaceae | ren   | LF   | Walnuss      | top  | ANT  | CCXIII / CXLIJ heylen die biss eines wütenden hundes                                                                                                                                           |
| <i>Juglans regia</i> L.        | Juglandaceae | ren   | LF   | Walnuss      | top  | DER  | CCXIII / CXLIJ macht schoen har                                                                                                                                                                |
| <i>Juglans regia</i> L.        | Juglandaceae | ren   | LF   | Walnuss      | top  | DER  | CCXIII / CXLIJ vertreiben die blasen maeier am leib                                                                                                                                            |
| <i>Juglans regia</i> L.        | Juglandaceae | ren   | LF   | Walnuss      | top  | DER  | CCXIII / CXLIJ guten gegen geschwaeren der brust und verzuckten glieder                                                                                                                        |
| <i>Juglans regia</i> L.        | Juglandaceae | ren   | LF   | Walnuss      | top  | DER  | CCXIII / CXLIJ gut zu menschen oder hundebiss                                                                                                                                                  |
| <i>Juglans regia</i> L.        | Juglandaceae | ren   | LF   | Walnuss      | top  | DER  | CCXIII / CXLIJ heykt die geschwaere des munds                                                                                                                                                  |
| <i>Juglans regia</i> L.        | Juglandaceae | ren   | LF   | Walnuss      | top  | GAS  | CCXIII / CXLIJ stillen das bauchgrimmen                                                                                                                                                        |
| <i>Juglans regia</i> L.        | Juglandaceae | ren   | LF   | Walnuss      | syst | GAS  | CCXIII / CXLIJ treiben sie die breyten würm aus                                                                                                                                                |
| <i>Juglans regia</i> L.        | Juglandaceae | ren   | LF   | Walnuss      | syst | GYN  | CCXIII / CXLIJ stellen den frauen ihre krankheyt                                                                                                                                               |
| <i>Juglans regia</i> L.        | Juglandaceae | s pop | JK   | Walnuss      | top  | DER  | p. 433 heilt Wunden und bring tWarzen zum Verschwinden                                                                                                                                         |
| <i>Juglans regia</i> L.        | Juglandaceae | s pop | JK   | Walnuss      | syst | DER  | p. 433 Ausschlag                                                                                                                                                                               |
| <i>Juglans regia</i> L.        | Juglandaceae | s pop | JK   | Walnuss      | syst | DER  | p. 433 Bleichsucht und Skrofulose                                                                                                                                                              |
| <i>Juglans regia</i> L.        | Juglandaceae | s pop | JK   | Walnuss      | top  | DER  | p. 433 Leiden im Hals, Mandeln, Kehlkopf, Frostbeulen, Krätze                                                                                                                                  |
| <i>Juglans regia</i> L.        | Juglandaceae | s pop | JK   | Walnuss      | top  | DER  | p. 433 Kopfwaschmittel bei Haarausfall                                                                                                                                                         |
| <i>Juglans regia</i> L.        | Juglandaceae | s pop | JK   | Walnuss      | top  | EYE  | p. 433 Augen                                                                                                                                                                                   |
| <i>Juglans regia</i> L.        | Juglandaceae | s pop | JK   | Walnuss      | syst | GAS  | p. 433 Magenstärkend, stillt den Durchfall                                                                                                                                                     |
| <i>Juglans regia</i> L.        | Juglandaceae | s pop | JK   | Walnuss      | syst | GAS  | p. 433 Zuckerkrankheit und Gelbsucht                                                                                                                                                           |
| <i>Juglans regia</i> L.        | Juglandaceae | s pop | JK   | Walnuss      | syst | n.d. | p. 433 Griesenbrand                                                                                                                                                                            |
| <i>Juglans regia</i> L.        | Juglandaceae | s pop | JK   | Walnuss      | syst | SKE  | p. 433 Rheumatismus                                                                                                                                                                            |
| <i>Juglans regia</i> L.        | Juglandaceae | s pop | KN   | Walnuss      | top  | DER  | p. 413 haurtsächlich Kinder, Skrofulose, Lymphfistelus                                                                                                                                         |
| <i>Juglans regia</i> L.        | Juglandaceae | s pop | UB   | Walnuss      | syst | DER  | p. 331 Ekzeme, Neurodermitis und Psoriasis                                                                                                                                                     |
| <i>Juglans regia</i> L.        | Juglandaceae | s pop | UB   | Walnuss      | top  | DER  | p. 331 Ekzeme, Neurodermitis und Psoriasis                                                                                                                                                     |
| <i>Juglans regia</i> L.        | Juglandaceae | s pop | UB   | Walnuss      | syst | GAS  | Heilpflanzen mit Gerbstoffen zum Binden, Ausleitung und                                                                                                                                        |
| <i>Juglans regia</i> L.        | Juglandaceae | s pop | WI   | Walnuss      | syst | GAS  | p. 461 Regeneration                                                                                                                                                                            |
| <i>Juglans regia</i> L.        | Juglandaceae | s pop | WI   | Walnuss      | syst | GAS  | p. 320 Volksmedizin: Magen-Damkratarrhen, Anthelmintikum                                                                                                                                       |
| <i>Juglans regia</i> L.        | Juglandaceae | s pop | WI   | Walnuss      | syst | URO  | p. 320 Volksmedizin: Blutreinigungsmittel                                                                                                                                                      |
| <i>Juglans regia</i> L.        | Juglandaceae | sci   | EMA  | Walnuss      | top  | DER  | /HPMC/34737/2011 minor inflammatory conditions of the skin                                                                                                                                     |
| <i>Juglans regia</i> L.        | Juglandaceae | sci   | EMA  | Walnuss      | top  | DER  | /HPMC/34737/2011 used in excessive perspiration of hands and feet                                                                                                                              |
| <i>Juglans regia</i> L.        | Juglandaceae | sci   | WI   | Walnuss      | top  | DER  | p. 320 Hautleiden                                                                                                                                                                              |
| <i>Juniperus communis</i> agg. | Cupressaceae | ant   | DIOS | Wacholder    | syst | ANT  | 95 gegen den Biss wilder Tiere                                                                                                                                                                 |
| <i>Juniperus communis</i> agg. | Cupressaceae | ant   | DIOS | Wacholder    | syst | GAS  | 95 Blähungen / Leibschniden                                                                                                                                                                    |
| <i>Juniperus communis</i> agg. | Cupressaceae | ant   | DIOS | Wacholder    | syst | GYN  | 95 bei Mutterkrämpfen                                                                                                                                                                          |
| <i>Juniperus communis</i> agg. | Cupressaceae | ant   | DIOS | Wacholder    | syst | n.d. | 95 inneren Zerreißungen                                                                                                                                                                        |
| <i>Juniperus communis</i> agg. | Cupressaceae | ant   | DIOS | Wacholder    | syst | NER  | 95 auch bei Krämpfen                                                                                                                                                                           |
| <i>Juniperus communis</i> agg. | Cupressaceae | ant   | DIOS | Wacholder    | vol  | OTH  | 95 vertreiben sie die wilden Tiere                                                                                                                                                             |
| <i>Juniperus communis</i> agg. | Cupressaceae | ant   | DIOS | Wacholder    | syst | RES  | 95 Getrunken wirkt sie bei Brustleiden, Husten                                                                                                                                                 |
| <i>Juniperus communis</i> agg. | Cupressaceae | ant   | DIOS | Wacholder    | syst | URO  | 95 auch unrntreibend                                                                                                                                                                           |
| <i>Juniperus communis</i> agg. | Cupressaceae | mon   | HvB  | Wacholder    | top  | FEV  | 3-43 verschiedene und uble Fieber                                                                                                                                                              |
| <i>Juniperus communis</i> agg. | Cupressaceae | mon   | HvB  | Wacholder    | syst | GAS  | 3-43 schmerzen in der leber                                                                                                                                                                    |
| <i>Juniperus communis</i> agg. | Cupressaceae | mon   | HvB  | Wacholder    | syst | RES  | 3-43 schmerzen in der Brust oder Lunge                                                                                                                                                         |
| <i>Juniperus communis</i> agg. | Cupressaceae | ren   | LF   | Wacholder    | vol  | APO  | XLIII / XXVI vertreibt die schlangen und den vergifften luft                                                                                                                                   |
| <i>Juniperus communis</i> agg. | Cupressaceae | ren   | LF   | Wacholder    | top  | DER  | XLIII / XXVI vertreibt die rauden                                                                                                                                                              |
| <i>Juniperus communis</i> agg. | Cupressaceae | ren   | LF   | Wacholder    | n.d. | DER  | heylet und trücknet aus die fistein, hände und fuss zerschunden                                                                                                                                |
| <i>Juniperus communis</i> agg. | Cupressaceae | ren   | LF   | Wacholder    | top  | DER  | XLIII / XXVI stirn gestrichen verstell das bluten der nasen                                                                                                                                    |
| <i>Juniperus communis</i> agg. | Cupressaceae | ren   | LF   | Wacholder    | syst | GAS  | XLIII / XXVI stercken den magen, vertreiben das bauchblehen                                                                                                                                    |

|                                                        |              |       |               |             |       |                 |                                                                      |                                                                 |
|--------------------------------------------------------|--------------|-------|---------------|-------------|-------|-----------------|----------------------------------------------------------------------|-----------------------------------------------------------------|
| Juniperus communis agg.                                | Cupressaceae | ren   | LF            | Wacholder   | syst. | GAS             | XLIII / XXVI                                                         | versteht es auch das würgen und die rote rhur.                  |
| Juniperus communis agg.                                | Cupressaceae | ren   | LF            | Wacholder   | top.  | GAS             | XLIII / XXVI                                                         | versteht es auch das würgen und speyen, den bauchfluss          |
| Juniperus communis agg.                                | Cupressaceae | ren   | LF            | Wacholder   | n.d.  | GAS             | XLIII / XXVI                                                         | toedt die wurm im leib                                          |
| Juniperus communis agg.                                | Cupressaceae | ren   | LF            | Wacholder   | syst. | GYN             | XLIII / XXVI                                                         | gut den weibern, denen die muter über sich steigt               |
| Juniperus communis agg.                                | Cupressaceae | ren   | LF            | Wacholder   | n.d.  | GYN             | XLIII / XXVI                                                         | stellet den weibern ihr krankhey                                |
| Juniperus communis agg.                                | Cupressaceae | ren   | LF            | Wacholder   | syst. | RES             | XLIII / XXVI                                                         | vertreiben den husten                                           |
| Juniperus communis agg.                                | Cupressaceae | ren   | LF            | Wacholder   | vol   | RES             | XLIII / XXVI                                                         | stellet die schnupffen                                          |
| Juniperus communis agg.                                | Cupressaceae | ren   | LF            | Wacholder   | top   | SKE             | XLIII / XXVI                                                         | denen den krampf haben und das hüftwee                          |
| Juniperus communis agg.                                | Cupressaceae | ren   | LF            | Wacholder   | syst  | URO             | XLIII / XXVI                                                         | treiben den harn                                                |
| Juniperus communis agg.                                | Cupressaceae | s pop | BVA           | Wacholder   | top   | DER             | p. 239                                                               | Flechten, Hautausschläge                                        |
| Juniperus communis agg.                                | Cupressaceae | s pop | BVA           | Wacholder   | syst  | GAS             | p. 239                                                               | Stärkung von Magen und Darm                                     |
| Juniperus communis agg.                                | Cupressaceae | s pop | BVA           | Wacholder   | syst  | HUM             | p. 239                                                               | Förderung des Stoffwechsels                                     |
| Juniperus communis agg.                                | Cupressaceae | s pop | BVA           | Wacholder   | syst  | SKE             | p. 239                                                               | Ausscheidung von harnsauren Salzen bei Rheuma und Gicht         |
| Juniperus communis agg.                                | Cupressaceae | s pop | BVA           | Wacholder   | top   | SKE             | p. 239                                                               | Einreiben bei Rheuma                                            |
| Juniperus communis agg.                                | Cupressaceae | s pop | BVA           | Wacholder   | syst  | TON             | p. 239                                                               | Steigerung der Widerstandskraft des Körpers                     |
| Juniperus communis agg.                                | Cupressaceae | s pop | BVA           | Wacholder   | syst  | URO             | p. 239                                                               | Schwellungen und bei Abmagerungskuren                           |
| Juniperus communis agg.                                | Cupressaceae | s pop | JK            | Wacholder   | syst  | GAS             | p. 431                                                               | Magenschwache                                                   |
| Juniperus communis agg.                                | Cupressaceae | s pop | JK            | Wacholder   | syst  | GAS             | p. 431                                                               | reinigt Magen und Gedärme                                       |
| Juniperus communis agg.                                | Cupressaceae | s pop | JK            | Wacholder   | vol   | RES             | p. 431                                                               | Hals- und Brustleiden, Lungenkatarrh, Keuchhusten               |
| Juniperus communis agg.                                | Cupressaceae | s pop | JK            | Wacholder   | top   | SKE             | p. 431                                                               | Gicht und Rheumatismus                                          |
| Juniperus communis agg.                                | Cupressaceae | s pop | JK            | Wacholder   | syst  | URO             | p. 431                                                               | reinigt Niere und Blase                                         |
| Juniperus communis agg.                                | Cupressaceae | s pop | JK            | Wacholder   | syst  | URO             | p. 431                                                               | Blutreinigungsmittel, Wasserabsonderung                         |
| Juniperus communis agg.                                | Cupressaceae | s pop | KN            | Wacholder   | vol   | APO             | p. 488                                                               | angenehmen Geruch                                               |
| Juniperus communis agg.                                | Cupressaceae | s pop | KN            | Wacholder   | syst  | GAS             | p. 488                                                               | schwacher Magen (Kur)                                           |
| Juniperus communis agg.                                | Cupressaceae | s pop | KN            | Wacholder   | vol   | RES             | p. 488                                                               | feuchter Bronchitis, Wirkung auf die Lunge                      |
| Juniperus communis agg.                                | Cupressaceae | s pop | KN            | Wacholder   | top   | SKE             | p. 488                                                               | Gelenkleiden und tiefliegenden Entzündungen                     |
| Juniperus communis agg.                                | Cupressaceae | s pop | KN            | Wacholder   | syst  | URO             | p. 488                                                               | harntreibend                                                    |
| Juniperus communis agg.                                | Cupressaceae | s pop | KN            | Wacholder   | syst  | URO             | p. 488                                                               | beginnender Wassersucht, Nierenausscheidungen                   |
| Juniperus communis agg.                                | Cupressaceae | s pop | UB            | Wacholder   | top   | SKE             | p. 293                                                               | degenerative rheumatische Erkrankungen                          |
| Juniperus communis agg.                                | Cupressaceae | s pop | UB            | Wacholder   | syst  | URO             | p. 257                                                               | Durchspülung                                                    |
| Juniperus communis agg.                                | Cupressaceae | s pop | WI            | Wacholder   | syst  | DER             | p. 323                                                               | Volksmedizin: schlecht heilende Wunden                          |
| Juniperus communis agg.                                | Cupressaceae | s pop | WI            | Wacholder   | syst  | SKE             | p. 323                                                               | Volksmedizin: Gicht und Rheuma                                  |
| Juniperus communis agg.                                | Cupressaceae | sci   | EMA           | Wacholder   | syst  | GAS             | /IMPC/441929/2008                                                    | flatulence                                                      |
| Juniperus communis agg.                                | Cupressaceae | sci   | EMA           | Wacholder   | syst  | GAS             | /IMPC/441929/2008                                                    | flatulence                                                      |
| Juniperus communis agg.                                | Cupressaceae | sci   | EMA           | Wacholder   | top   | SKE             | /HMPC/12402/2010                                                     | as adjuvant in the relief of minor muscular and articular pain  |
| Juniperus communis agg.                                | Cupressaceae | sci   | EMA           | Wacholder   | syst  | URO             | /HMPC/12402/2010                                                     | tract as an adjuvant in minor urinary tract complaints          |
| Juniperus communis agg.                                | Cupressaceae | sci   | EMA           | Wacholder   | syst  | URO             | /IMPC/441929/2008                                                    | tract as an adjuvant in minor urinary tract complaints          |
| Juniperus communis agg.                                | Cupressaceae | sci   | EMA           | Wacholder   | syst  | URO             | /IMPC/441929/2008                                                    | tract as an adjuvant in minor urinary tract complaints          |
| Juniperus communis agg.                                | Cupressaceae | sci   | EMA           | Wacholder   | syst  | URO             | /IMPC/441929/2008                                                    | tract as an adjuvant in minor urinary tract complaints          |
| Juniperus sabina L.                                    | Cupressaceae | ant   | DIOS          | Sadebaum    | syst  | GYN             | 96                                                                   | treiben den Fötus aus                                           |
| Juniperus sabina L.                                    | Cupressaceae | ant   | DIOS          | Sadebaum    | syst  | GYN             | 96                                                                   | treiben den Fötus aus                                           |
| Juniperus sabina L.                                    | Cupressaceae | ant   | DIOS          | Sadebaum    | vol   | GYN             | 96                                                                   | treiben den Fötus aus                                           |
| Juniperus sabina L.                                    | Cupressaceae | ant   | DIOS          | Sadebaum    | top   | n.d.            | 96                                                                   | Blätter beider hemmen um sich fressende Geschwüre und lindern   |
| Juniperus sabina L.                                    | Cupressaceae | ant   | DIOS          | Sadebaum    | top   | n.d.            | 96                                                                   | Karbunkeln auf                                                  |
| Juniperus sabina L.                                    | Cupressaceae | ant   | DIOS          | Sadebaum    | top   | n.d.            | 96                                                                   | erwärmenden Sabelien                                            |
| Juniperus sabina L.                                    | Cupressaceae | ant   | DIOS          | Sadebaum    | syst  | URO             | 96                                                                   | föhren sie auch das Blut durch den Urin ab                      |
| Juniperus sabina L.                                    | Cupressaceae | ant   | DIOS          | Sadebaum    | syst  | URO             | 96                                                                   | föhren sie auch das Blut durch den Urin ab                      |
| Juniperus sabina L.                                    | Cupressaceae | ant   | DIOS          | Sadebaum    | vol   | URO             | 96                                                                   | föhren sie auch das Blut durch den Urin ab                      |
| Juniperus sabina L.                                    | Cupressaceae | mon   | HvB           | Sadebaum    | top   | DER             | 3-21                                                                 | annagen                                                         |
| Juniperus sabina L.                                    | Cupressaceae | mon   | HvB           | Sadebaum    | syst  | RES             | 3-21                                                                 | Schmerzen in der Lunge, so dass seine Lunge giftig ist und faul |
| Juniperus sabina L.                                    | Cupressaceae | mon   | MF            | Sabina      | top   | DER             | 12                                                                   | den Eiter                                                       |
| Juniperus sabina L.                                    | Cupressaceae | mon   | MF            | Sabina      | top   | DER             | 12                                                                   | verleiht der Haut Glanz                                         |
| Juniperus sabina L.                                    | Cupressaceae | mon   | MF            | Sabina      | top   | DER             | 12                                                                   | Milzbrand (gute Bläschen)                                       |
| Juniperus sabina L.                                    | Cupressaceae | mon   | MF            | Sabina      | syst  | GYN             | 12                                                                   | geordneter Monatsfluss                                          |
| Juniperus sabina L.                                    | Cupressaceae | mon   | MF            | Sabina      | top   | GYN             | 12                                                                   | von unten an Muttermund geführt, zieht sie eine abgestorbene    |
| Juniperus sabina L.                                    | Cupressaceae | mon   | MF            | Sabina      | top   | NER             | 12                                                                   | Leibesfrucht aus der Gebärmutter                                |
| Juniperus sabina L.                                    | Cupressaceae | ren   | LF            | Seivstrauch | top   | DER             | LXXXII / LIIII                                                       | geschwäre, die um sich fressen                                  |
| Juniperus sabina L.                                    | Cupressaceae | ren   | LF            | Seivstrauch | syst  | GAS             | LXXXII / LIIII                                                       | vertreiben sie die geelsucht                                    |
| Juniperus sabina L.                                    | Cupressaceae | ren   | LF            | Seivstrauch | syst  | GYN             | LXXXII / LIIII                                                       | treiben tote frucht aus muter leib                              |
| Juniperus sabina L.                                    | Cupressaceae | ren   | LF            | Seivstrauch | top   | GYN             | LXXXII / LIIII                                                       | bringen den frauen ihr bloedigket                               |
| Juniperus sabina L.                                    | Cupressaceae | s pop | VAL           | Sadebaum    | top   | DER             | p. 453                                                               | plaes putrides (ulcères putrides ou gangréneux)                 |
| Juniperus sabina L.                                    | Cupressaceae | s pop | VAL           | Sadebaum    | syst  | GYN             | p. 453                                                               | métrorragies                                                    |
| Lepidium spp. (Lepidium off., Nasturtium Brassicaceae) | ant          | DIOS  | Gartenkresse  | top         | DER   | 160             | auch den Aussatz nimmt es weg                                        |                                                                 |
| Lepidium spp. (Lepidium off., Nasturtium Brassicaceae) | ant          | DIOS  | Brunnenkresse | top         | DER   | 147             | vertreibt Leber- und Sonnenbrandflecken                              |                                                                 |
| Lepidium spp. (Lepidium off., Nasturtium Brassicaceae) | ant          | DIOS  | Gartenkresse  | top         | OTH   | 160             | Milzschmerzen                                                        |                                                                 |
| Lepidium spp. (Lepidium off., Nasturtium Brassicaceae) | ant          | DIOS  | Gartenkresse  | top         | SKE   | 160             | als Umschlag ein sehr hilfreiches Mittel gegen Ischias               |                                                                 |
| Lepidium spp. (Lepidium off., Nasturtium Brassicaceae) | ant          | DIOS  | Gartenkresse  | top         | TEE   | 160             | scheint auch Zahnschmerzen zu lindern                                |                                                                 |
| Lepidium spp. (Lepidium off., Nasturtium Brassicaceae) | ant          | DIOS  | Brunnenkresse | syst        | URO   | 147             | treibt den Harn                                                      |                                                                 |
| Lepidium spp. (Lepidium off., Nasturtium Brassicaceae) | mon          | HvB   | Brunnenkresse | syst        | GAS   | 1-73            | gegessene Speisen kaum verdauen                                      |                                                                 |
| Lepidium spp. (Lepidium off., Nasturtium Brassicaceae) | mon          | HvB   | Brunnenkresse | syst        | GAS   | 1-73            | Gelbsucht                                                            |                                                                 |
| Lepidium spp. (Lepidium off., Nasturtium Brassicaceae) | mon          | LO    | Gartenkresse  | n.d.        | OTH   | n.d.            | n.d.                                                                 |                                                                 |
| Lepidium spp. (Lepidium off., Nasturtium Brassicaceae) | mon          | MF    | Brunnenkresse | syst        | ANT   | 30              | soll sich den Schlangengiften widersetzen                            |                                                                 |
| Lepidium spp. (Lepidium off., Nasturtium Brassicaceae) | mon          | MF    | Brunnenkresse | syst        | APH   | 30              | zähmt die Liebeskraft                                                |                                                                 |
| Lepidium spp. (Lepidium off., Nasturtium Brassicaceae) | mon          | MF    | Brunnenkresse | top         | DER   | 30              | stösst ein Furunkel seinen Eiter aus, treibt die Krätze fort, Jucken |                                                                 |
| Lepidium spp. (Lepidium off., Nasturtium Brassicaceae) | mon          | MF    | Brunnenkresse | top         | DER   | 30              | und scheussliche Schwären dein Haupt verunzieren                     |                                                                 |
| Lepidium spp. (Lepidium off., Nasturtium Brassicaceae) | mon          | MF    | Brunnenkresse | top         | DER   | 30              | soll die ausfallenden Haare zurück halten                            |                                                                 |
| Lepidium spp. (Lepidium off., Nasturtium Brassicaceae) | mon          | MF    | Brunnenkresse | top         | DER   | 30              | Milzbrand (gute Bläschen)                                            |                                                                 |
| Lepidium spp. (Lepidium off., Nasturtium Brassicaceae) | mon          | MF    | Brunnenkresse | syst        | GAS   | 30              | treiben                                                              |                                                                 |
| Lepidium spp. (Lepidium off., Nasturtium Brassicaceae) | mon          | MF    | Brunnenkresse | syst        | GYN   | 30              | treibt die Leibesfrucht ab                                           |                                                                 |
| Lepidium spp. (Lepidium off., Nasturtium Brassicaceae) | mon          | MF    | Brunnenkresse | vol         | OTH   | 30              | vertreibt allein sein Duft sämtliche Schlangen                       |                                                                 |
| Lepidium spp. (Lepidium off., Nasturtium Brassicaceae) | mon          | MF    | Brunnenkresse | syst        | OTH   | 30              | mildert Milzschwellung, wenn er häufig getrunken wird                |                                                                 |
| Lepidium spp. (Lepidium off., Nasturtium Brassicaceae) | mon          | MF    | Brunnenkresse | syst        | ANT   | 30              | ein jeder Schmerz, der deine Brust beklemmt, bezähmt der Samen       |                                                                 |
| Lepidium spp. (Lepidium off., Nasturtium Brassicaceae) | mon          | MF    | Brunnenkresse | syst        | RES   | 30              | aber deinen Husten                                                   |                                                                 |
| Lepidium spp. (Lepidium off., Nasturtium Brassicaceae) | mon          | MF    | Brunnenkresse | top         | SKE   | 30              | der schmerzenden Hüftgicht aufgelegt                                 |                                                                 |
| Lepidium spp. (Lepidium off., Nasturtium Brassicaceae) | mon          | MF    | Brunnenkresse | top         | TEE   | 30              | Zahnweh, giesst man die Saft ins Ohr der Kopfseite, wo der böse      |                                                                 |
| Lepidium spp. (Lepidium off., Nasturtium Brassicaceae) | ren          | LF    | Gartenkresse  | syst        | ANT   | CCIIII / CXXXVI | widersteet er schlangen un giftige thier                             |                                                                 |
| Lepidium spp. (Lepidium off., Nasturtium Brassicaceae) | ren          | LF    | Gartenkresse  | n.d.        | APH   | CCIIII / CXXXVI | reizt zu unkeuscheyt                                                 |                                                                 |
| Lepidium spp. (Lepidium off., Nasturtium Brassicaceae) | ren          | LF    | Gartenkresse  | n.d.        | DER   | CCIIII / CXXXVI | heylet alle blatern und schebigkeyt des grinds, böse masen und       |                                                                 |
| Lepidium spp. (Lepidium off., Nasturtium Brassicaceae) | ren          | LF    | Gartenkresse  | n.d.        | DER   | CCIIII / CXXXVI | flecken                                                              |                                                                 |
| Lepidium spp. (Lepidium off., Nasturtium Brassicaceae) | ren          | LF    | Gartenkresse  | top         | DER   | CCIIII / CXXXVI | zerteylt er die kropff                                               |                                                                 |
| Lepidium spp. (Lepidium off., Nasturtium Brassicaceae) | ren          | LF    | Gartenkresse  | top         | DER   | CCIIII / CXXXVI | vertreibt die schwaep un arind auf dem haupt                         |                                                                 |
| Lepidium spp. (Lepidium off., Nasturtium Brassicaceae) | ren          | LF    | Gartenkresse  | top         | DER   | CCIIII / CXXXVI | zerteylt also gebraucht allerley geschwulst                          |                                                                 |
| Lepidium spp. (Lepidium off., Nasturtium Brassicaceae) | ren          | LF    | Gartenkresse  | top         | DER   | CCIIII / CXXXVI | heylet er die geschwaer un schaden so umb sich fressen               |                                                                 |
| Lepidium spp. (Lepidium off., Nasturtium Brassicaceae) | ren          | LF    | Gartenkresse  | top         | DER   | CCIIII / CXXXVI | behelt die har vest und steiff                                       |                                                                 |
| Lepidium spp. (Lepidium off., Nasturtium Brassicaceae) | ren          | LF    | Gartenkresse  | top         | EAR   | CCIIII / CXXXVI | bringt wider das gehoer                                              |                                                                 |
| Lepidium spp. (Lepidium off., Nasturtium Brassicaceae) | ren          | LF    | Gartenkresse  | syst        | EYE   | CCIIII / CXXXVI | reynigt auch das haupt un scherpfft das gesicht                      |                                                                 |
| Lepidium spp. (Lepidium off., Nasturtium Brassicaceae) | ren          | LF    | Gartenkresse  | n.d.        | GAS   | CCIIII / CXXXVI | reynigt den bauch                                                    |                                                                 |
| Lepidium spp. (Lepidium off., Nasturtium Brassicaceae) | ren          | LF    | Gartenkresse  | syst        | GAS   | CCIIII / CXXXVI | treibt aus die gallen durch den stulgang                             |                                                                 |



Dal Cero M., Saller R., Leonti M., Weckerle C.S.



|                                 |           |       |       |                    |      |     |                 |                                                                                                                                                                              |
|---------------------------------|-----------|-------|-------|--------------------|------|-----|-----------------|------------------------------------------------------------------------------------------------------------------------------------------------------------------------------|
| <i>Linum usitatissimum</i> agg. | Linaceae  | sci   | WI    | Lein               | syst | GAS | p. 347          | Quell-Abführmittel                                                                                                                                                           |
| <i>Malus sylvestris</i> agg.    | Rosaceae  | ant   | DIOS  | Apfel              | n.d. | OTH | 108             | Auch die unreife Frucht erweist sich zusammenziehend, die ausgereifte aber nicht in gleichem Grade.                                                                          |
| <i>Malus sylvestris</i> agg.    | Rosaceae  | ant   | DIOS  | Apfel              | n.d. | OTH | 108             | Die Blätter, Blüten und Zweige von jeglichem Apfelbaum, am meisten von der Quitte, adstringiren                                                                              |
| <i>Malus sylvestris</i> agg.    | Rosaceae  | mon   | HvB   | Apfelbaum          | top  | EYE | 3-1             | irgendeine Augenirritation                                                                                                                                                   |
| <i>Malus sylvestris</i> agg.    | Rosaceae  | mon   | HvB   | Apfelbaum          | top  | GAS | 3-1             | Leber- und Milzschwäche, oder von üblen Säften des Bauches oder Magens                                                                                                       |
| <i>Malus sylvestris</i> agg.    | Rosaceae  | mon   | HvB   | Apfelbaum          | top  | NER | 3-1             | Migräne im Kopf                                                                                                                                                              |
| <i>Malus sylvestris</i> agg.    | Rosaceae  | mon   | HvB   | Apfelbaum          | syst | OTH | 3-1             | gut zu essen für Gesunde und Kranke                                                                                                                                          |
| <i>Malus sylvestris</i> agg.    | Rosaceae  | mon   | HvB   | Apfelbaum          | top  | SKE | 3-1             | Schmerzen in Schultern, Bauch, Lenden                                                                                                                                        |
| <i>Malus sylvestris</i> agg.    | Rosaceae  | mon   | HvB   | Apfelbaum          | top  | SKE | 3-1             | Gich in den Nieren und Lendengegend                                                                                                                                          |
| <i>Malus sylvestris</i> agg.    | Rosaceae  | ren   | TAB   | Apfelbaum          | syst | ANT | n.d.            | widerstreben sie dem Gift/ und treiben die Würm aus dem Leib                                                                                                                 |
| <i>Malus sylvestris</i> agg.    | Rosaceae  | ren   | TAB   | Apfelbaum          | top  | EYE | n.d.            | über das Aug gelegt/ stillt die Schmerzen und Wehetagen desselbig                                                                                                            |
| <i>Malus sylvestris</i> agg.    | Rosaceae  | ren   | TAB   | Apfelbaum          | syst | FEV | n.d.            | werden nützlich in den Fiebern im Mund gehalten/ denselbigen darml                                                                                                           |
| <i>Malus sylvestris</i> agg.    | Rosaceae  | ren   | TAB   | Apfelbaum          | syst | GAS | n.d.            | welchen der Mage von vieler Feuchtigkeit verderbt ist / erweichen etw                                                                                                        |
| <i>Malus sylvestris</i> agg.    | Rosaceae  | ren   | TAB   | Apfelbaum          | syst | OTH | n.d.            | und treiben die Würm aus dem Leib                                                                                                                                            |
| <i>Malus sylvestris</i> agg.    | Rosaceae  | ren   | TAB   | Apfelbaum          | top  | OTH | n.d.            | stechen der Seiten                                                                                                                                                           |
| <i>Malus sylvestris</i> agg.    | Rosaceae  | s pop | JK    | Apfelbaum          | syst | CAR | p. 324          | Herzklopfen, Herzschwäche                                                                                                                                                    |
| <i>Malus sylvestris</i> agg.    | Rosaceae  | s pop | JK    | Apfelbaum          | top  | DER | p. 323          | desinfiziert die Mundhöhle                                                                                                                                                   |
| <i>Malus sylvestris</i> agg.    | Rosaceae  | s pop | JK    | Apfelbaum          | top  | DER | p. 324          | Halsleiden, Mandelschwellungen und Geschwüren                                                                                                                                |
| <i>Malus sylvestris</i> agg.    | Rosaceae  | s pop | JK    | Apfelbaum          | syst | FEV | p. 324          | Fieber                                                                                                                                                                       |
| <i>Malus sylvestris</i> agg.    | Rosaceae  | s pop | JK    | Apfelbaum          | syst | GAS | p. 323          | regt die Leber an, bindet die überschüssigen Säuren des Magens, fördert die Tätigkeit der [Nieren] und Gedärme, schützt vor Verdauungsbeschwerden, Fettleibigkeit, Durchfall |
| <i>Malus sylvestris</i> agg.    | Rosaceae  | s pop | JK    | Apfelbaum          | syst | NER | p. 323          | wirkt vorteilhaft auf das Gehirn                                                                                                                                             |
| <i>Malus sylvestris</i> agg.    | Rosaceae  | s pop | JK    | Apfelbaum          | syst | NER | p. 324          | stärkt die Nerven, Gedächtnis                                                                                                                                                |
| <i>Malus sylvestris</i> agg.    | Rosaceae  | s pop | JK    | Apfelbaum          | syst | RES | p. 323          | schützt vor Halskrankheiten                                                                                                                                                  |
| <i>Malus sylvestris</i> agg.    | Rosaceae  | s pop | JK    | Apfelbaum          | syst | URO | p. 324          | reinigt das Blut, Stein- und Gichtleiden, Nieren und Blasenkrankheiten                                                                                                       |
| <i>Malva sylvestris</i> agg.    | Malvaceae | ant   | DIOS  | Malve              | syst | ANT | 144             | hilft gegen alle tödlichen Gifte, die, welche sie genießen, müssen aber anhaltend erbrechen; ferner gegen den Biss der Spinne                                                |
| <i>Malva sylvestris</i> agg.    | Malvaceae | ant   | DIOS  | Malve              | top  | DER | 144             | Aufgestrichen wirkt sie auch gegen die Stiche der Bienen und Wespen                                                                                                          |
| <i>Malva sylvestris</i> agg.    | Malvaceae | ant   | DIOS  | Malve              | top  | DER | 144             | zur Vernarbung                                                                                                                                                               |
| <i>Malva sylvestris</i> agg.    | Malvaceae | ant   | DIOS  | Malve              | top  | DER | 144             | heilt sie Schorf und Kleingrind, so heilen sie Feuerbrandwunden und roseartige Entzündungen                                                                                  |
| <i>Malva sylvestris</i> agg.    | Malvaceae | ant   | DIOS  | Malve              | top  | DER | 144             | gegen Beschädigungen der Eingeweide, der Gebärmutter und des After                                                                                                           |
| <i>Malva sylvestris</i> agg.    | Malvaceae | ant   | DIOS  | Malve              | top  | DER | 144             | Umschlag, die Kraft, die Tränenfistel (Aeglopie) zu heilen                                                                                                                   |
| <i>Malva sylvestris</i> agg.    | Malvaceae | ant   | DIOS  | Malve              | top  | EYE | 144             | aber gut für den Bauch und am besten die Stengel                                                                                                                             |
| <i>Malva sylvestris</i> agg.    | Malvaceae | ant   | DIOS  | Malve              | n.d. | GAS | 144             | als Sitzbad erweicht die Gebärmutter                                                                                                                                         |
| <i>Malva sylvestris</i> agg.    | Malvaceae | ant   | DIOS  | Malve              | top  | GYN | 144             | als Sitzbad erweicht die Gebärmutter                                                                                                                                         |
| <i>Malva sylvestris</i> agg.    | Malvaceae | ant   | DIOS  | Malve              | syst | GYN | 144             | befördert die Mikthiassonderung                                                                                                                                              |
| <i>Malva sylvestris</i> agg.    | Malvaceae | ant   | DIOS  | Malve              | top  | OTH | 144             | bleibt er von den Stichen verschont                                                                                                                                          |
| <i>Malva sylvestris</i> agg.    | Malvaceae | ant   | DIOS  | Malve              | syst | URO | 144             | lindert die Schmerzen der Blase                                                                                                                                              |
| <i>Malva sylvestris</i> agg.    | Malvaceae | ant   | DIOS  | Malve              | n.d. | URO | 144             | Heilsam ist sie für die Eingeweide und die Blase                                                                                                                             |
| <i>Malva sylvestris</i> agg.    | Malvaceae | mon   | HvB   | Malve              | top  | EYE | 1-97            | Sehvermögen der Augen erheilen                                                                                                                                               |
| <i>Malva sylvestris</i> agg.    | Malvaceae | mon   | HvB   | Malve              | syst | GAS | 1-97            | kranker Magen                                                                                                                                                                |
| <i>Malva sylvestris</i> agg.    | Malvaceae | mon   | HvB   | Malve              | top  | NER | 1-97            | Melancholie im Gehirn Schmerzen bereitet                                                                                                                                     |
| <i>Malva sylvestris</i> agg.    | Malvaceae | mon   | MF    | Malve              | syst | ANT | 62              | begegnet sie giftigen Tränken                                                                                                                                                |
| <i>Malva sylvestris</i> agg.    | Malvaceae | mon   | MF    | Malve              | n.d. | APH | 62              | soll Liebeskraft erregen                                                                                                                                                     |
| <i>Malva sylvestris</i> agg.    | Malvaceae | mon   | MF    | Malve              | n.d. | APD | 62              | Krankheit der Brüste abwehren                                                                                                                                                |
| <i>Malva sylvestris</i> agg.    | Malvaceae | mon   | MF    | Malve              | top  | DER | 62              | Brandwunden lindern                                                                                                                                                          |
| <i>Malva sylvestris</i> agg.    | Malvaceae | mon   | MF    | Malve              | top  | DER | 62              | heilst du Bienenstiche                                                                                                                                                       |
| <i>Malva sylvestris</i> agg.    | Malvaceae | mon   | MF    | Malve              | top  | DER | 62              | schändliche Kopfgründflechten und Schuppen                                                                                                                                   |
| <i>Malva sylvestris</i> agg.    | Malvaceae | mon   | MF    | Malve              | top  | DER | 62              | blutende Wunden geheilt werden, Prellungen                                                                                                                                   |
| <i>Malva sylvestris</i> agg.    | Malvaceae | mon   | MF    | Malve              | top  | EYE | 62              | Augengeschwüre                                                                                                                                                               |
| <i>Malva sylvestris</i> agg.    | Malvaceae | mon   | MF    | Malve              | syst | GAS | 62              | nützt sie den Darmen                                                                                                                                                         |
| <i>Malva sylvestris</i> agg.    | Malvaceae | mon   | MF    | Malve              | syst | GAS | 62              | Krankheitsfällen an den Darmen sowie am After                                                                                                                                |
| <i>Malva sylvestris</i> agg.    | Malvaceae | mon   | MF    | Malve              | top  | GYN | 62              | abreißend auf die Leibfrucht                                                                                                                                                 |
| <i>Malva sylvestris</i> agg.    | Malvaceae | mon   | MF    | Malve              | top  | GYN | 62              | Verhärtungen in der Gebärmutter erweicht                                                                                                                                     |
| <i>Malva sylvestris</i> agg.    | Malvaceae | mon   | MF    | Malve              | top  | OTH | 62              | Antoniusfeuer löschen                                                                                                                                                        |
| <i>Malva sylvestris</i> agg.    | Malvaceae | mon   | MF    | Malve              | top  | TEE | 62              | weher Zahn                                                                                                                                                                   |
| <i>Malva sylvestris</i> agg.    | Malvaceae | mon   | MF    | Malve              | syst | URO | 62              | heile sie die Blase                                                                                                                                                          |
| <i>Malva sylvestris</i> agg.    | Malvaceae | ren   | LF    | Malve              | top  | ANT | CLXXXIX / CXCIH | heilen die stich der imen, bisse der giftigen thier                                                                                                                          |
| <i>Malva sylvestris</i> agg.    | Malvaceae | ren   | LF    | Malve              | top  | DER | CLXXXIX / CXCIH | geschwaer so zwischen der nasen und den augen sich erheben                                                                                                                   |
| <i>Malva sylvestris</i> agg.    | Malvaceae | ren   | LF    | Malve              | top  | DER | CLXXXIX / CXCIH | fließenden erbrind (?) und die schuppen auf dem haupt, rotlauf                                                                                                               |
| <i>Malva sylvestris</i> agg.    | Malvaceae | ren   | LF    | Malve              | top  | DER | CLXXXIX / CXCIH | und brandt, allerley spreisel                                                                                                                                                |
| <i>Malva sylvestris</i> agg.    | Malvaceae | ren   | LF    | Malve              | syst | DER | CLXXXIX / CXCIH | geschwaer so zwischen der nasen und den augen sich erheben                                                                                                                   |
| <i>Malva sylvestris</i> agg.    | Malvaceae | ren   | LF    | Malve              | top  | GAS | CLXXXIX / CXCIH | heylet die schwierigen daerm, muter und den hindern                                                                                                                          |
| <i>Malva sylvestris</i> agg.    | Malvaceae | ren   | LF    | Malve              | syst | GYN | CLXXXIX / CXCIH | macht den frauen milch, leichter geben                                                                                                                                       |
| <i>Malva sylvestris</i> agg.    | Malvaceae | ren   | LF    | Malve              | top  | GYN | CLXXXIX / CXCIH | erweichen die verherete muter                                                                                                                                                |
| <i>Malva sylvestris</i> agg.    | Malvaceae | ren   | LF    | Malve              | syst | NER | CLXXXIX / CXCIH | macht schlaffen                                                                                                                                                              |
| <i>Malva sylvestris</i> agg.    | Malvaceae | ren   | LF    | Malve              | top  | RES | CLXXXIX / CXCIH | gebresten der Brust und lungen                                                                                                                                               |
| <i>Malva sylvestris</i> agg.    | Malvaceae | ren   | LF    | Malve              | syst | URO | CLXXXIX / CXCIH | schmerzen der blasen                                                                                                                                                         |
| <i>Malva sylvestris</i> agg.    | Malvaceae | s pop | BVA   | Käsilkraut - Malve | top  | DER | p. 121          | Mundschleimhautentzündung                                                                                                                                                    |
| <i>Malva sylvestris</i> agg.    | Malvaceae | s pop | BVA   | Käsilkraut - Malve | top  | DER | p. 121          | Furunkeln, Umlauf, Eiterherden, entzündeten Wunden, Nagelbettentzündung, nässenden und eitrigen Ekzemen, Hautentzündungen                                                    |
| <i>Malva sylvestris</i> agg.    | Malvaceae | s pop | BVA   | Käsilkraut - Malve | syst | GAS | p. 121          | Magen- Darmkoliken, Gastritis                                                                                                                                                |
| <i>Malva sylvestris</i> agg.    | Malvaceae | s pop | BVA   | Käsilkraut - Malve | syst | GAS | p. 121          | Magen- Darmkoliken, Gastritis                                                                                                                                                |
| <i>Malva sylvestris</i> agg.    | Malvaceae | s pop | BVA   | Käsilkraut - Malve | syst | GYN | p. 121          | Entzündungen im Unterleib der Frau                                                                                                                                           |
| <i>Malva sylvestris</i> agg.    | Malvaceae | s pop | BVA   | Käsilkraut - Malve | syst | GYN | p. 121          | Entzündungen im Unterleib der Frau                                                                                                                                           |
| <i>Malva sylvestris</i> agg.    | Malvaceae | s pop | BVA   | Käsilkraut - Malve | syst | RES | p. 121          | Erkrankungen der Atmungsorgane und Lungenerkrankungen; Bronchitis, Husten, Heiserkeit, Rachen- und Kehlkopfkatarrh, Angina, Mandelentzündungen und Lungenemphysem            |
| <i>Malva sylvestris</i> agg.    | Malvaceae | s pop | BVA   | Käsilkraut - Malve | syst | RES | p. 121          | Erkrankungen der Atmungsorgane und Lungenerkrankungen; Bronchitis, Husten, Heiserkeit, Rachen- und Kehlkopfkatarrh, Angina, Mandelentzündungen und Lungenemphysem            |
| <i>Malva sylvestris</i> agg.    | Malvaceae | s pop | JK    | Wilde Malve        | syst | RES | p. 394          | Insektenstichen                                                                                                                                                              |
| <i>Malva sylvestris</i> agg.    | Malvaceae | s pop | JK    | Wilde Malve        | top  | DER | p. 394          | Geschwulsten und Eiterungen                                                                                                                                                  |
| <i>Malva sylvestris</i> agg.    | Malvaceae | s pop | JK    | Wilde Malve        | syst | GAS | p. 394          | schwache Därme, Darmgeschwüre                                                                                                                                                |
| <i>Malva sylvestris</i> agg.    | Malvaceae | s pop | JK    | Wilde Malve        | syst | OTH | p. 394          | inneren Entzündungen                                                                                                                                                         |
| <i>Malva sylvestris</i> agg.    | Malvaceae | s pop | JK    | Wilde Malve        | syst | OTH | p. 394          | allen inneren Entzündungen                                                                                                                                                   |
| <i>Malva sylvestris</i> agg.    | Malvaceae | s pop | JK    | Wilde Malve        | top  | SKE | p. 394          | Quetschungen                                                                                                                                                                 |
| <i>Malva sylvestris</i> agg.    | Malvaceae | s pop | JK    | Wilde Malve        | syst | URO | p. 394          | Reicht Steine in Nieren und Blase                                                                                                                                            |
| <i>Malva sylvestris</i> agg.    | Malvaceae | s pop | UB    | Malve              | top  | DER | p. 330          | allgemeine Behandlung von Ekzemen, Neurodermitis, Psoriasis                                                                                                                  |
| <i>Malva sylvestris</i> agg.    | Malvaceae | s pop | UB    | Malve              | top  | DER | p. 330          | allgemeine Behandlung von Ekzemen, Neurodermitis, Psoriasis                                                                                                                  |
| <i>Malva sylvestris</i> agg.    | Malvaceae | s pop | UB    | Malve              | syst | GAS | p. 166          | Sodbrennen, Gastritis, Magen- und Zwölffingerdarmgeschwür                                                                                                                    |
| <i>Malva sylvestris</i> agg.    | Malvaceae | s pop | UB    | Malve              | syst | RES | p. 166          | unproduktiver Reizhusten                                                                                                                                                     |
| <i>Malva sylvestris</i> agg.    | Malvaceae | s pop | UB    | Malve              | top  | RES | p. 166          | Entzündungen der Mund- und Rachenschleimhaut                                                                                                                                 |
| <i>Malva sylvestris</i> agg.    | Malvaceae | s pop | WI    | Malve              | top  | DER | p. 364          | Volksmedizin: Wundbehandlung                                                                                                                                                 |
| <i>Malva sylvestris</i> agg.    | Malvaceae | sci   | ESCOP | Malvae flos        | syst | GAS | II p. 157       | irritation of the gastric mucosa                                                                                                                                             |
| <i>Malva sylvestris</i> agg.    | Malvaceae | sci   | ESCOP | Malvae flos        | syst | RES | II p. 157       | dry cough, irritation of the oral, pharyngeal                                                                                                                                |
| <i>Malva sylvestris</i> agg.    | Malvaceae | sci   | ESCOP | Malvae flos        | top  | RES | II p. 157       | irritation of the oral, pharyngeal or gastric mucosa                                                                                                                         |
| <i>Malva sylvestris</i> agg.    | Malvaceae | sci   | WI    | Malve              | syst | GAS | p. 364          | Gastroenteritis                                                                                                                                                              |
| <i>Malva sylvestris</i> agg.    | Malvaceae | sci   | WI    | Malve              | syst | GAS | p. 368          | Magen- Darmentzündungen                                                                                                                                                      |
| <i>Malva sylvestris</i> agg.    | Malvaceae | sci   | WI    | Malve              | syst | RES | p. 364          | Erkältungskrankheiten                                                                                                                                                        |
| <i>Malva sylvestris</i> agg.    | Malvaceae | sci   | WI    | Malve              | syst | RES | p. 368          | Erkältungskrankheiten                                                                                                                                                        |
| <i>Marrubium vulgare</i> L.     | Lamiaceae | ant   | DIOS  | Andorn             | top  | DER | 198             | reinigen schmutzige Geschwüre, halten Pterygien und fressende Geschwüre auf                                                                                                  |
| <i>Marrubium vulgare</i> L.     | Lamiaceae | ant   | DIOS  | Andorn             | top  | EAR | 198             | ist ein gutes Mittel bei Ohrenschmerzen                                                                                                                                      |
| <i>Marrubium vulgare</i> L.     | Lamiaceae | ant   | DIOS  | Andorn             | top  | EYE | 198             | so scharf auch das Gesicht                                                                                                                                                   |
| <i>Marrubium vulgare</i> L.     | Lamiaceae | ant   | DIOS  | Andorn             | syst | EYE | 198             | Phthisis                                                                                                                                                                     |
| <i>Marrubium vulgare</i> L.     | Lamiaceae | ant   | DIOS  | Andorn             | syst | GAS | 198             | beseitigt ferner auch die Gelbsucht durch die Nase                                                                                                                           |

|                                 |            |       |      |         |      |      |                  |                                                                                                                                                                                                            |
|---------------------------------|------------|-------|------|---------|------|------|------------------|------------------------------------------------------------------------------------------------------------------------------------------------------------------------------------------------------------|
| <i>Marrubium vulgare</i> L.     | Lamiaceae  | ant   | DIOS | Andorn  | top  | OTH  | 198              | und lindern Seitenschmerzen                                                                                                                                                                                |
| <i>Marrubium vulgare</i> L.     | Lamiaceae  | ant   | DIOS | Andorn  | syst | RES  | 198              | Asthma und Husten Leidenden gegeben; fahren sie auch den dicken Schleim aus der Brust.                                                                                                                     |
| <i>Marrubium vulgare</i> L.     | Lamiaceae  | ant   | DIOS | Andorn  | syst | RES  | 198              | denen, die eine schwere Geburt haben                                                                                                                                                                       |
| <i>Marrubium vulgare</i> L.     | Lamiaceae  | ant   | DIOS | Andorn  | syst | RES  | 198              | die von giftigen Tieren gebissen sind und die Gift geschluckt haben                                                                                                                                        |
| <i>Marrubium vulgare</i> L.     | Lamiaceae  | ant   | DIOS | Andorn  | syst | RES  | 198              | Der Blase aber und den Nieren sind sie nicht zuträglich                                                                                                                                                    |
| <i>Marrubium vulgare</i> L.     | Lamiaceae  | mon   | HvB  | Andorn  | top  | EAR  | 1-33             | taube Ohren                                                                                                                                                                                                |
| <i>Marrubium vulgare</i> L.     | Lamiaceae  | mon   | HvB  | Andorn  | syst | GAS  | 1-33             | krankte und gebrochene Eingeweide                                                                                                                                                                          |
| <i>Marrubium vulgare</i> L.     | Lamiaceae  | mon   | HvB  | Andorn  | syst | RES  | 1-33             | krankte Kehle                                                                                                                                                                                              |
| <i>Marrubium vulgare</i> L.     | Lamiaceae  | mon   | HvB  | Andorn  | syst | RES  | 1-33             | Husten (Fenchel, Dill)                                                                                                                                                                                     |
| <i>Marrubium vulgare</i> L.     | Lamiaceae  | mon   | MF   | Andorn  | top  | DER  | 42               | reinigt eiternde Wunden und führt Geschwüre, die das Fleisch wegfressen einer Heilung zu                                                                                                                   |
| <i>Marrubium vulgare</i> L.     | Lamiaceae  | mon   | MF   | Andorn  | top  | EAR  | 42               | drückenden Ohrenschmerz beheben                                                                                                                                                                            |
| <i>Marrubium vulgare</i> L.     | Lamiaceae  | mon   | MF   | Andorn  | top  | EYE  | 42               | macht der die schwachen, trüben Augen helllichtig                                                                                                                                                          |
| <i>Marrubium vulgare</i> L.     | Lamiaceae  | mon   | MF   | Andorn  | top  | GAS  | 42               | hilft er Gelbsüchtigen                                                                                                                                                                                     |
| <i>Marrubium vulgare</i> L.     | Lamiaceae  | mon   | MF   | Andorn  | syst | GYN  | 42               | beschleunigt die Kindsgeburth und Nachgeburth                                                                                                                                                              |
| <i>Marrubium vulgare</i> L.     | Lamiaceae  | mon   | MF   | Andorn  | syst | n.d. | 42               | den Seitenschmerz beruhigen                                                                                                                                                                                |
| <i>Marrubium vulgare</i> L.     | Lamiaceae  | mon   | MF   | Andorn  | syst | RES  | 42               | Schwindel                                                                                                                                                                                                  |
| <i>Marrubium vulgare</i> L.     | Lamiaceae  | mon   | MF   | Andorn  | syst | RES  | 42               | bezaehnet die verschiedenen Brustkrankheiten, hilft den Astmatikern und treibt den husten fort                                                                                                             |
| <i>Marrubium vulgare</i> L.     | Lamiaceae  | ren   | LF   | Andorn  | syst | ANT  | CCCCXXXV / CCXXV | denen so von nattern gebissen sind oder giftig getrunken haben                                                                                                                                             |
| <i>Marrubium vulgare</i> L.     | Lamiaceae  | ren   | LF   | Andorn  | top  | DER  | CCCCXXXV / CCXXV | renygen die alten schaden, die geschwaer der negel, und verhueten dass die geschwaer um sich fressen, heylet die flecht                                                                                    |
| <i>Marrubium vulgare</i> L.     | Lamiaceae  | ren   | LF   | Andorn  | top  | DER  | CCCCXXXV / CCXXV | verzehren die kroppf                                                                                                                                                                                       |
| <i>Marrubium vulgare</i> L.     | Lamiaceae  | ren   | LF   | Andorn  | top  | EAR  | CCCCXXXV / CCXXV | leht den schmerzen der ohren                                                                                                                                                                               |
| <i>Marrubium vulgare</i> L.     | Lamiaceae  | ren   | LF   | Andorn  | top  | EYE  | CCCCXXXV / CCXXV | macht klare augen                                                                                                                                                                                          |
| <i>Marrubium vulgare</i> L.     | Lamiaceae  | ren   | LF   | Andorn  | syst | GAS  | CCCCXXXV / CCXXV | eröffnen die verstopfte elber und die milz                                                                                                                                                                 |
| <i>Marrubium vulgare</i> L.     | Lamiaceae  | ren   | LF   | Andorn  | syst | GYN  | CCCCXXXV / CCXXV | bringen den frauen ir krankheyd und treiben aus das nachbürdlin,                                                                                                                                           |
| <i>Marrubium vulgare</i> L.     | Lamiaceae  | ren   | LF   | Andorn  | top  | n.d. | CCCCXXXV / CCXXV | so schwerlich geben                                                                                                                                                                                        |
| <i>Marrubium vulgare</i> L.     | Lamiaceae  | ren   | LF   | Andorn  | top  | n.d. | CCCCXXXV / CCXXV | lindern die schmerzen der selten                                                                                                                                                                           |
| <i>Marrubium vulgare</i> L.     | Lamiaceae  | ren   | LF   | Andorn  | syst | RES  | CCCCXXXV / CCXXV | denen so schwerlich athmen, den husten und die schwindel                                                                                                                                                   |
| <i>Marrubium vulgare</i> L.     | Lamiaceae  | ren   | LF   | Andorn  | syst | RES  | CCCCXXXV / CCXXV | denen so schwerlich athmen, den husten und die schwindel                                                                                                                                                   |
| <i>Marrubium vulgare</i> L.     | Lamiaceae  | s pop | BVA  | Andorn  | syst | GAS  | p. 20            | Galle                                                                                                                                                                                                      |
| <i>Marrubium vulgare</i> L.     | Lamiaceae  | s pop | BVA  | Andorn  | syst | GAS  | p. 20            | Galle                                                                                                                                                                                                      |
| <i>Marrubium vulgare</i> L.     | Lamiaceae  | s pop | BVA  | Andorn  | syst | GYN  | p. 20            | schwache Menstruation                                                                                                                                                                                      |
| <i>Marrubium vulgare</i> L.     | Lamiaceae  | s pop | BVA  | Andorn  | syst | GYN  | p. 20            | schwache Menstruation                                                                                                                                                                                      |
| <i>Marrubium vulgare</i> L.     | Lamiaceae  | s pop | BVA  | Andorn  | syst | OTH  | p. 20            | Unterfunktion des Knochenmarks                                                                                                                                                                             |
| <i>Marrubium vulgare</i> L.     | Lamiaceae  | s pop | BVA  | Andorn  | syst | OTH  | p. 20            | Unterfunktion des Knochenmarks                                                                                                                                                                             |
| <i>Marrubium vulgare</i> L.     | Lamiaceae  | s pop | BVA  | Andorn  | syst | RES  | p. 20            | Asthma, Bronchitis, Keuchhusten, chronischem Husten,                                                                                                                                                       |
| <i>Marrubium vulgare</i> L.     | Lamiaceae  | s pop | BVA  | Andorn  | syst | RES  | p. 20            | Asthma, Bronchitis, Keuchhusten, chronischem Husten,                                                                                                                                                       |
| <i>Marrubium vulgare</i> L.     | Lamiaceae  | s pop | BVA  | Andorn  | syst | TON  | p. 20            | elderly people                                                                                                                                                                                             |
| <i>Marrubium vulgare</i> L.     | Lamiaceae  | s pop | BVA  | Andorn  | syst | TON  | p. 20            | elderly people                                                                                                                                                                                             |
| <i>Marrubium vulgare</i> L.     | Lamiaceae  | s pop | JK   | Andorn  | top  | DER  | p. 322           | Hautkrankheiten                                                                                                                                                                                            |
| <i>Marrubium vulgare</i> L.     | Lamiaceae  | s pop | JK   | Andorn  | syst | GAS  | p. 322           | Leber, Gelbsucht und gegen die Würmer                                                                                                                                                                      |
| <i>Marrubium vulgare</i> L.     | Lamiaceae  | s pop | JK   | Andorn  | syst | GYN  | p. 322           | monatliche Periode Schmerzen empfinden, säubern den Unterleib                                                                                                                                              |
| <i>Marrubium vulgare</i> L.     | Lamiaceae  | s pop | JK   | Andorn  | syst | NER  | p. 322           | Nervenschwäche                                                                                                                                                                                             |
| <i>Marrubium vulgare</i> L.     | Lamiaceae  | s pop | JK   | Andorn  | syst | RES  | p. 322           | Andorntee kräftigt die Brust und stillt Blutspeien und Krämpfe                                                                                                                                             |
| <i>Marrubium vulgare</i> L.     | Lamiaceae  | s pop | JK   | Andorn  | syst | URO  | p. 322           | hilft denen die schwerlich urinieren, lost Sand und Stein auf                                                                                                                                              |
| <i>Marrubium vulgare</i> L.     | Lamiaceae  | s pop | UB   | Andorn  | syst | GAS  | p. 150           | reine Bittermittel                                                                                                                                                                                         |
| <i>Marrubium vulgare</i> L.     | Lamiaceae  | s pop | UB   | Andorn  | syst | GAS  | p. 150           | reine Bittermittel                                                                                                                                                                                         |
| <i>Marrubium vulgare</i> L.     | Lamiaceae  | sci   | EMA  | Andorn  | syst | GAS  | IMPC/604271/2012 | Traditional herbal medicinal product used for symptomatic treatment of mild dyspeptic complaints such as bloating and flatulence./ Traditional herbal medicinal product used in temporary loss of appetite |
| <i>Marrubium vulgare</i> L.     | Lamiaceae  | sci   | EMA  | Andorn  | syst | GAS  | IMPC/604271/2012 | Traditional herbal medicinal product used for symptomatic treatment of mild dyspeptic complaints such as bloating and flatulence./ Traditional herbal medicinal product used in temporary loss of appetite |
| <i>Marrubium vulgare</i> L.     | Lamiaceae  | sci   | EMA  | Andorn  | syst | GAS  | IMPC/604271/2012 | Traditional herbal medicinal product used for symptomatic treatment of mild dyspeptic complaints such as bloating and flatulence./ Traditional herbal medicinal product used in temporary loss of appetite |
| <i>Marrubium vulgare</i> L.     | Lamiaceae  | sci   | EMA  | Andorn  | syst | GAS  | IMPC/604271/2012 | Traditional herbal medicinal product used for symptomatic treatment of mild dyspeptic complaints such as bloating and flatulence./ Traditional herbal medicinal product used in temporary loss of appetite |
| <i>Marrubium vulgare</i> L.     | Lamiaceae  | sci   | EMA  | Andorn  | syst | GAS  | IMPC/604271/2012 | Traditional herbal medicinal product used for symptomatic treatment of mild dyspeptic complaints such as bloating and flatulence./ Traditional herbal medicinal product used in temporary loss of appetite |
| <i>Marrubium vulgare</i> L.     | Lamiaceae  | sci   | EMA  | Andorn  | syst | RES  | IMPC/604271/2012 | Traditional herbal medicinal product used as an expectorant in cough associated with cold.                                                                                                                 |
| <i>Marrubium vulgare</i> L.     | Lamiaceae  | sci   | EMA  | Andorn  | syst | RES  | IMPC/604271/2012 | Traditional herbal medicinal product used as an expectorant in cough associated with cold.                                                                                                                 |
| <i>Marrubium vulgare</i> L.     | Lamiaceae  | sci   | EMA  | Andorn  | syst | RES  | IMPC/604271/2012 | Traditional herbal medicinal product used as an expectorant in cough associated with cold.                                                                                                                 |
| <i>Matricaria chamomilla</i> L. | Asteraceae | ant   | DIOS | Kamille | top  | DER  | 206              | helfen sie auch bei Geissauge                                                                                                                                                                              |
| <i>Matricaria chamomilla</i> L. | Asteraceae | ant   | DIOS | Kamille | top  | DER  | 206              | helen sie Soor                                                                                                                                                                                             |
| <i>Matricaria chamomilla</i> L. | Asteraceae | ant   | DIOS | Kamille | top  | FEV  | 206              | um das periodische Fieber zu vertreiben                                                                                                                                                                    |
| <i>Matricaria chamomilla</i> L. | Asteraceae | ant   | DIOS | Kamille | syst | GAS  | 206              | gegen Blähungen und Darmverschlingung getrunken, vertreiben die Gelbsucht und heilen Leberleiden                                                                                                           |
| <i>Matricaria chamomilla</i> L. | Asteraceae | ant   | DIOS | Kamille | syst | GYN  | 206              | Embryo aus                                                                                                                                                                                                 |
| <i>Matricaria chamomilla</i> L. | Asteraceae | ant   | DIOS | Kamille | top  | GYN  | 206              | im Trank und Sitzbade befördern sie die Menstruation, treiben den Embryo aus                                                                                                                               |
| <i>Matricaria chamomilla</i> L. | Asteraceae | ant   | DIOS | Kamille | syst | URO  | 206              | sowie den Stein und den Urin; Abkochung gegen Blasenentzündung                                                                                                                                             |
| <i>Matricaria chamomilla</i> L. | Asteraceae | ant   | DIOS | Kamille | top  | URO  | 206              | sowie den Stein und den Urin                                                                                                                                                                               |
| <i>Matricaria chamomilla</i> L. | Asteraceae | mon   | HvB  | Kamille | syst | GAS  | 1-116            | wer in den Eingeweiden Schmerzen hat                                                                                                                                                                       |
| <i>Matricaria chamomilla</i> L. | Asteraceae | mon   | HvB  | Kamille | syst | GYN  | 1-116            | und wenn die Frauen den Monatsfluss haben, sollen sie dies Suppe, wie vorhin gesagt, bereiten und essen, und dies bereitet eine angenehme und leichte Reinigung                                            |
| <i>Matricaria chamomilla</i> L. | Asteraceae | mon   | MF   | Kamille | syst | ANT  | 14               | so hindert si durch diesen Trunk verderbenbringende Schlangenbisse                                                                                                                                         |
| <i>Matricaria chamomilla</i> L. | Asteraceae | mon   | MF   | Kamille | top  | DER  | 14               | tilgt es Schuppen und Leberflecken im Gesicht                                                                                                                                                              |
| <i>Matricaria chamomilla</i> L. | Asteraceae | mon   | MF   | Kamille | top  | DER  | 14               | Hautentzündungen                                                                                                                                                                                           |
| <i>Matricaria chamomilla</i> L. | Asteraceae | mon   | MF   | Kamille | top  | EYE  | 14               | Augenschwellungen sowie eiter fressende Schwären                                                                                                                                                           |
| <i>Matricaria chamomilla</i> L. | Asteraceae | mon   | MF   | Kamille | top  | FEV  | 14               | Fieberkranken wärmend selbst, wirst du Schüttelfrost und oftmals Fieber selbst vertreiben                                                                                                                  |
| <i>Matricaria chamomilla</i> L. | Asteraceae | mon   | MF   | Kamille | syst | GAS  | 14               | beruhigt das Grimmen und eine Aufblähung des Magens, hilft Gelbsüchtigen, bei Beschwerden des Magens                                                                                                       |
| <i>Matricaria chamomilla</i> L. | Asteraceae | mon   | MF   | Kamille | syst | GYN  | 14               | sorgt für ordentlichen Monatsfluss, mit Wein getrunken die Leibesfrucht abtreiben                                                                                                                          |
| <i>Matricaria chamomilla</i> L. | Asteraceae | mon   | MF   | Kamille | top  | n.d. | 14               | geschwollener Weichbauch behandeln                                                                                                                                                                         |
| <i>Matricaria chamomilla</i> L. | Asteraceae | mon   | MF   | Kamille | syst | URO  | 14               | treibt Haru zerbricht die Blasensteine                                                                                                                                                                     |
| <i>Matricaria chamomilla</i> L. | Asteraceae | ren   | LF   | Kamille | syst | URO  | 14               | reinigt sie durch den Harmluss die Milz                                                                                                                                                                    |
| <i>Matricaria chamomilla</i> L. | Asteraceae | ren   | LF   | Kamille | syst | ANT  | XIII / VIII      | denen so von nattern gebissen sind                                                                                                                                                                         |
| <i>Matricaria chamomilla</i> L. | Asteraceae | ren   | LF   | Kamille | top  | DER  | XIII / VIII      | vertreiben die mundeule                                                                                                                                                                                    |
| <i>Matricaria chamomilla</i> L. | Asteraceae | ren   | LF   | Kamille | top  | DER  | XIII / VIII      | heylet alte wunden und schaden                                                                                                                                                                             |
| <i>Matricaria chamomilla</i> L. | Asteraceae | ren   | LF   | Kamille | top  | EYE  | XIII / VIII      | fisteln der augen                                                                                                                                                                                          |
| <i>Matricaria chamomilla</i> L. | Asteraceae | ren   | LF   | Kamille | top  | FEV  | XIII / VIII      | clystier im fieber gebraucht                                                                                                                                                                               |

|                                 |            |       |       |                  |      |      |                 |                                                                                                                                                                                                                   |
|---------------------------------|------------|-------|-------|------------------|------|------|-----------------|-------------------------------------------------------------------------------------------------------------------------------------------------------------------------------------------------------------------|
| <i>Matricaria chamomilla</i> L. | Asteraceae | ren   | LF    | Kamille          | syst | GAS  | XIII / VIII     | daerm, reinigt die geelsüchtigen und ist nützlich den lebersüchtigen                                                                                                                                              |
| <i>Matricaria chamomilla</i> L. | Asteraceae | ren   | LF    | Kamille          | syst | GYN  | XIII / VIII     | bringen den frauen ir zeyt                                                                                                                                                                                        |
| <i>Matricaria chamomilla</i> L. | Asteraceae | ren   | LF    | Kamille          | top  | GYN  | XIII / VIII     | bringen den frauen ir zeyt                                                                                                                                                                                        |
| <i>Matricaria chamomilla</i> L. | Asteraceae | ren   | LF    | Kamille          | top  | SKE  | XIII / VIII     | gleder                                                                                                                                                                                                            |
| <i>Matricaria chamomilla</i> L. | Asteraceae | ren   | LF    | Kamille          | syst | URO  | XIII / VIII     | treiben den harn und den stein                                                                                                                                                                                    |
| <i>Matricaria chamomilla</i> L. | Asteraceae | ren   | LF    | Kamille          | top  | URO  | XIII / VIII     | treiben den harn und den stein, lindern den schmerzen der blase                                                                                                                                                   |
| <i>Matricaria chamomilla</i> L. | Asteraceae | s pop | BVA   | Kamille          | syst | GAS  | p. 115          | Brechreiz                                                                                                                                                                                                         |
| <i>Matricaria chamomilla</i> L. | Asteraceae | s pop | BVA   | Kamille          | syst | NER  | p. 115          | innere Unruhe                                                                                                                                                                                                     |
| <i>Matricaria chamomilla</i> L. | Asteraceae | s pop | BVA   | Kamille          | top  | RES  | p. 115          | Schnupfen, Neben- und Stirnhöhlenkatarrh                                                                                                                                                                          |
| <i>Matricaria chamomilla</i> L. | Asteraceae | s pop | BVA   | Kamille          | syst | TEE  | p. 115          | Zahnoperationen                                                                                                                                                                                                   |
| <i>Matricaria chamomilla</i> L. | Asteraceae | s pop | BVA   | Kamille          | syst | URO  | p. 115          | Blasenentzündung                                                                                                                                                                                                  |
| <i>Matricaria chamomilla</i> L. | Asteraceae | s pop | JK    | Kamille          | top  | DER  | p. 380          | Geschwulsten, Beulen                                                                                                                                                                                              |
| <i>Matricaria chamomilla</i> L. | Asteraceae | s pop | JK    | Kamille          | top  | DER  | p. 380          | Zahnoperation                                                                                                                                                                                                     |
| <i>Matricaria chamomilla</i> L. | Asteraceae | s pop | JK    | Kamille          | top  | EAR  | p. 380          | Ohrenleiden                                                                                                                                                                                                       |
| <i>Matricaria chamomilla</i> L. | Asteraceae | s pop | JK    | Kamille          | top  | EYE  | p. 380          | Augenleiden                                                                                                                                                                                                       |
| <i>Matricaria chamomilla</i> L. | Asteraceae | s pop | JK    | Kamille          | syst | GAS  | p. 380          | Gelbsucht                                                                                                                                                                                                         |
| <i>Matricaria chamomilla</i> L. | Asteraceae | s pop | JK    | Kamille          | top  | GAS  | p. 380          | Blähungen, Druck                                                                                                                                                                                                  |
| <i>Matricaria chamomilla</i> L. | Asteraceae | s pop | JK    | Kamille          | syst | GYN  | p. 380          | inneren Krämpfen (der Frauen)                                                                                                                                                                                     |
| <i>Matricaria chamomilla</i> L. | Asteraceae | s pop | JK    | Kamille          | top  | GYN  | p. 380          | inneren Krämpfen (der Frauen)                                                                                                                                                                                     |
| <i>Matricaria chamomilla</i> L. | Asteraceae | s pop | JK    | Kamille          | top  | NER  | p. 380          | Kopfschmerzen                                                                                                                                                                                                     |
| <i>Matricaria chamomilla</i> L. | Asteraceae | s pop | JK    | Kamille          | syst | RES  | p. 380          | Enge auf der Brust                                                                                                                                                                                                |
| <i>Matricaria chamomilla</i> L. | Asteraceae | s pop | JK    | Kamille          | top  | SKE  | p. 380          | Quetschungen, Rheumatismus, Gicht                                                                                                                                                                                 |
| <i>Matricaria chamomilla</i> L. | Asteraceae | s pop | JK    | Kamille          | syst | URO  | p. 380          | Steinleiden                                                                                                                                                                                                       |
| <i>Matricaria chamomilla</i> L. | Asteraceae | s pop | KN    | Kamille          | top  | DER  | p. 476          | Angina . Zanfleischeiterungen)                                                                                                                                                                                    |
| <i>Matricaria chamomilla</i> L. | Asteraceae | s pop | KN    | Kamille          | top  | EYE  | p. 476          | Spülflüssigkeit (Lidrand)                                                                                                                                                                                         |
| <i>Matricaria chamomilla</i> L. | Asteraceae | s pop | KN    | Kamille          | syst | FEV  | p. 476          | schweißtreibendes Mittel                                                                                                                                                                                          |
| <i>Matricaria chamomilla</i> L. | Asteraceae | s pop | KN    | Kamille          | top  | n.d. | p. 476          | n.d.                                                                                                                                                                                                              |
| <i>Matricaria chamomilla</i> L. | Asteraceae | s pop | KN    | Kamille          | syst | RES  | p. 476          | Erkältungen                                                                                                                                                                                                       |
| <i>Matricaria chamomilla</i> L. | Asteraceae | s pop | KN    | Kamille          | syst | URO  | p. 476          | Spülflüssigkeit (Unterleibs- und Blasenkatarrh)                                                                                                                                                                   |
| <i>Matricaria chamomilla</i> L. | Asteraceae | s pop | MT    | Kamille          | top  | DER  | p. 29           | Wundschmerzen                                                                                                                                                                                                     |
| <i>Matricaria chamomilla</i> L. | Asteraceae | s pop | MT    | Kamille          | syst | GAS  | p. 29           | Blähungen, Durchfall, Magenleiden, Verschleimungen                                                                                                                                                                |
| <i>Matricaria chamomilla</i> L. | Asteraceae | s pop | MT    | Kamille          | syst | GYN  | p. 29           | Menstruationsstörungen                                                                                                                                                                                            |
| <i>Matricaria chamomilla</i> L. | Asteraceae | s pop | MT    | Kamille          | syst | NER  | p. 29           | Schlaflosigkeit                                                                                                                                                                                                   |
| <i>Matricaria chamomilla</i> L. | Asteraceae | s pop | MT    | Kamille          | vol  | RES  | p. 29           | Schnupfen, Nebenhöhlenkatarrh                                                                                                                                                                                     |
| <i>Matricaria chamomilla</i> L. | Asteraceae | s pop | MT    | Kamille          | top  | TEE  | p. 29           | Zahnschmerzen                                                                                                                                                                                                     |
| <i>Matricaria chamomilla</i> L. | Asteraceae | s pop | MT    | Kamille          | syst | URO  | p. 29           | Nebenhodenentzündungen                                                                                                                                                                                            |
| <i>Matricaria chamomilla</i> L. | Asteraceae | s pop | UB    | Kamille          | top  | DER  | p. 303          | Wundbehandlung                                                                                                                                                                                                    |
| <i>Matricaria chamomilla</i> L. | Asteraceae | s pop | UB    | Kamille          | top  | DER  | p. 303          | Wundbehandlung                                                                                                                                                                                                    |
| <i>Matricaria chamomilla</i> L. | Asteraceae | s pop | UB    | Kamille          | top  | DER  | p. 303          | Wundbehandlung                                                                                                                                                                                                    |
| <i>Matricaria chamomilla</i> L. | Asteraceae | s pop | UB    | Kamille          | syst | GAS  | p. 146 / 164    | akute Magenerkrankungen/ Sodbrennen, Gastritis, Magen- und Zwölffingerdarmgeschwür                                                                                                                                |
| <i>Matricaria chamomilla</i> L. | Asteraceae | sci   | EMA   | Kamille          | top  | DER  | /HMP/27814/2010 | Traditional herbal medicinal product used for adjuvant therapy of irritations of skin and mucosae in the anal and genital region, after serious conditions have been excluded by a medical doctor.                |
| <i>Matricaria chamomilla</i> L. | Asteraceae | sci   | EMA   | Kamille          | top  | DER  | /HMP/55843/2011 | Traditional herbal medicinal product (indication 3) for the treatment of minor ulcers and inflammations of the mouth and throat.                                                                                  |
| <i>Matricaria chamomilla</i> L. | Asteraceae | sci   | EMA   | Kamille          | top  | DER  | /HMP/55843/2011 | Traditional herbal medicinal product (indication 4) used for adjuvant therapy of irritations of skin and mucosae in the anal and genital region, after serious conditions have been excluded by a medical doctor. |
| <i>Matricaria chamomilla</i> L. | Asteraceae | sci   | EMA   | Kamille          | top  | DER  | /HMP/55843/2011 | Traditional herbal medicinal product (indication 5) used for the treatment of minor inflammation of the skin (sunburn) and superficial wounds and small boils (furuncles).                                        |
| <i>Matricaria chamomilla</i> L. | Asteraceae | sci   | EMA   | Kamille          | top  | DER  | /HMP/55843/2011 | Traditional herbal medicinal product (indication 1) used for the symptomatic treatment of minor gastro-intestinal complaints such as bloating and minor spasms.                                                   |
| <i>Matricaria chamomilla</i> L. | Asteraceae | sci   | EMA   | Kamille          | syst | GAS  | /HMP/55843/2011 | Traditional herbal medicinal product (indication 2) used for the relief of symptoms of common cold.                                                                                                               |
| <i>Matricaria chamomilla</i> L. | Asteraceae | sci   | ESCOP | Matricariae flos | top  | RES  | I p. 312        | respiratory tract                                                                                                                                                                                                 |
| <i>Matricaria chamomilla</i> L. | Asteraceae | sci   | WI    | Kamille          | syst | GYN  | p. 376          | Menstruationsbeschwerden                                                                                                                                                                                          |
| <i>Melissa officinalis</i> L.   | Lamiaceae  | ant   | DIOS  | Melisse          | syst | ANT  | 197             | durch den Genuß von (giftigen) Pilzen geparirt werden                                                                                                                                                             |
| <i>Melissa officinalis</i> L.   | Lamiaceae  | ant   | DIOS  | Melisse          | top  | ANT  | 197             | gutes Mittel gegen Skorpion und Spinnenstiche und Hundsbißse                                                                                                                                                      |
| <i>Melissa officinalis</i> L.   | Lamiaceae  | ant   | DIOS  | Melisse          | vol  | ANT  | 197             | gutes Mittel gegen Skorpion und Spinnenstiche und Hundsbißse                                                                                                                                                      |
| <i>Melissa officinalis</i> L.   | Lamiaceae  | ant   | DIOS  | Melisse          | top  | DER  | 197             | zerteilen sie Drüsen am Halse und reinigen Geschwüre                                                                                                                                                              |
| <i>Melissa officinalis</i> L.   | Lamiaceae  | ant   | DIOS  | Melisse          | syst | GAS  | 197             | und gegen Leibschnitten                                                                                                                                                                                           |
| <i>Melissa officinalis</i> L.   | Lamiaceae  | ant   | DIOS  | Melisse          | top  | GAS  | 197             | als Klistier bei Dysenterie                                                                                                                                                                                       |
| <i>Melissa officinalis</i> L.   | Lamiaceae  | ant   | DIOS  | Melisse          | top  | GYN  | 197             | zur Beförderung der Katamenien                                                                                                                                                                                    |
| <i>Melissa officinalis</i> L.   | Lamiaceae  | ant   | DIOS  | Melisse          | syst | RES  | 197             | den an Orthopnoe Leidenden                                                                                                                                                                                        |
| <i>Melissa officinalis</i> L.   | Lamiaceae  | ant   | DIOS  | Melisse          | top  | SKE  | 197             | Gelenkschmerzen beseitigen sie als Umschlag                                                                                                                                                                       |
| <i>Melissa officinalis</i> L.   | Lamiaceae  | ant   | DIOS  | Melisse          | top  | TEE  | 197             | als Mundspülwasser bei Zahnschmerzen                                                                                                                                                                              |
| <i>Melissa officinalis</i> L.   | Lamiaceae  | mon   | HvB   | Melisse          | top  | EYE  | 1-59            | Aber wenn das Weiße im Auge wächst                                                                                                                                                                                |
| <i>Melissa officinalis</i> L.   | Lamiaceae  | mon   | HvB   | Melisse          | syst | OTH  | 1-59            | und ein Mensch der sie isst, lacht gern, weil ihre Wärme die Milz berührt und daher das Herz erfreut wird                                                                                                         |
| <i>Melissa officinalis</i> L.   | Lamiaceae  | mon   | MF    | Melisse          | syst | DER  | 50              | reinigt fressende Geschwüre, falls sie eitern                                                                                                                                                                     |
| <i>Melissa officinalis</i> L.   | Lamiaceae  | mon   | MF    | Melisse          | top  | DER  | 50              | altverhärtete Beulen, Hamorhoiden                                                                                                                                                                                 |
| <i>Melissa officinalis</i> L.   | Lamiaceae  | mon   | MF    | Melisse          | top  | DER  | 50              | Bienen-, Wespen-, Spinnenstich                                                                                                                                                                                    |
| <i>Melissa officinalis</i> L.   | Lamiaceae  | mon   | MF    | Melisse          | top  | DER  | 50              | Hundebiss                                                                                                                                                                                                         |
| <i>Melissa officinalis</i> L.   | Lamiaceae  | mon   | MF    | Melisse          | top  | EYE  | 50              | macht trübe Augen helllichtig                                                                                                                                                                                     |
| <i>Melissa officinalis</i> L.   | Lamiaceae  | mon   | MF    | Melisse          | syst | GAS  | 50              | verloßt es schädliche Aufblähungen                                                                                                                                                                                |
| <i>Melissa officinalis</i> L.   | Lamiaceae  | mon   | MF    | Melisse          | syst | GAS  | 50              | Blutstuhl und Bauchgrimmen leidenden                                                                                                                                                                              |
| <i>Melissa officinalis</i> L.   | Lamiaceae  | mon   | MF    | Melisse          | syst | GYN  | 50              | Reinigung der Frau                                                                                                                                                                                                |
| <i>Melissa officinalis</i> L.   | Lamiaceae  | mon   | MF    | Melisse          | syst | GYN  | 50              | sorgt für geordneten Monatsfluss                                                                                                                                                                                  |
| <i>Melissa officinalis</i> L.   | Lamiaceae  | mon   | MF    | Melisse          | syst | RES  | 50              | Astma und Atemnot                                                                                                                                                                                                 |
| <i>Melissa officinalis</i> L.   | Lamiaceae  | mon   | MF    | Melisse          | syst | SKE  | 50              | lindert das Leiden aller Gelenke                                                                                                                                                                                  |
| <i>Melissa officinalis</i> L.   | Lamiaceae  | mon   | MF    | Melisse          | top  | TEE  | 50              | pflegt den Zahnschmerz zu dämpfen                                                                                                                                                                                 |
| <i>Melissa officinalis</i> L.   | Lamiaceae  | ren   | LF    | Melisse          | syst | ANT  | CCLXXXII / CX   | wider die biss der schlangen, und anderen vergifften thier, so einer giftige schwämme gessen hat                                                                                                                  |
| <i>Melissa officinalis</i> L.   | Lamiaceae  | ren   | LF    | Melisse          | top  | ANT  | CCLXXXII / CX   | wider die biss der schlangen, und anderen vergifften thier                                                                                                                                                        |
| <i>Melissa officinalis</i> L.   | Lamiaceae  | ren   | LF    | Melisse          | top  | DER  | CCLXXXII / CX   | vertreiben die kroepff, reynigen und heylen die wunden, lindern den schmerzen                                                                                                                                     |
| <i>Melissa officinalis</i> L.   | Lamiaceae  | ren   | LF    | Melisse          | top  | EYE  | CCLXXXII / CX   | klars gesicht                                                                                                                                                                                                     |
| <i>Melissa officinalis</i> L.   | Lamiaceae  | ren   | LF    | Melisse          | top  | GAS  | CCLXXXII / CX   | rote rhur                                                                                                                                                                                                         |
| <i>Melissa officinalis</i> L.   | Lamiaceae  | ren   | LF    | Melisse          | syst | GYN  | CCLXXXII / CX   | verhindert das aufsteigen der muter                                                                                                                                                                               |
| <i>Melissa officinalis</i> L.   | Lamiaceae  | ren   | LF    | Melisse          | top  | GYN  | CCLXXXII / CX   | bringt den frauen ir zeyt                                                                                                                                                                                         |
| <i>Melissa officinalis</i> L.   | Lamiaceae  | ren   | LF    | Melisse          | syst | NER  | CCLXXXII / CX   | denen die traurig sind, dann es macht froelich, sinnreich mache                                                                                                                                                   |
| <i>Melissa officinalis</i> L.   | Lamiaceae  | ren   | LF    | Melisse          | syst | RES  | CCLXXXII / CX   | und gute leichte troem                                                                                                                                                                                            |
| <i>Melissa officinalis</i> L.   | Lamiaceae  | ren   | LF    | Melisse          | syst | RES  | CCLXXXII / CX   | die den athemb nit mögen haben denn auffrecht                                                                                                                                                                     |
| <i>Melissa officinalis</i> L.   | Lamiaceae  | ren   | LF    | Melisse          | top  | TEE  | CCLXXXII / CX   | still den wustagen der zahn                                                                                                                                                                                       |
| <i>Melissa officinalis</i> L.   | Lamiaceae  | s pop | BVA   | Zitronenmelisse  | top  | DER  | p. 276          | Fieberbläschen an Lippen und Mund                                                                                                                                                                                 |
| <i>Melissa officinalis</i> L.   | Lamiaceae  | s pop | BVA   | Zitronenmelisse  | syst | GAS  | p. 276          | Krämpfe im Darm und Unterleib, Brechreiz, Übelkeit (Schwangerschaft), nervöse Magenbeschwerden, Darmkatarrh, Appetitlosigkeit                                                                                     |
| <i>Melissa officinalis</i> L.   | Lamiaceae  | s pop | BVA   | Zitronenmelisse  | syst | GAS  | p. 276          | Blähungen mit Herzbeschwerden                                                                                                                                                                                     |
| <i>Melissa officinalis</i> L.   | Lamiaceae  | s pop | BVA   | Zitronenmelisse  | syst | GYN  | p. 276          | schmerzhafte Periode                                                                                                                                                                                              |
| <i>Melissa officinalis</i> L.   | Lamiaceae  | s pop | BVA   | Zitronenmelisse  | top  | GYN  | p. 276          | Menstruationsbeschwerden                                                                                                                                                                                          |

|                               |           |           |                 |          |                  |                                                                     |
|-------------------------------|-----------|-----------|-----------------|----------|------------------|---------------------------------------------------------------------|
|                               |           |           |                 |          |                  | Nervosität, Herzneurosen, Herzklopfen, Schlaflosigkeit durch        |
| <i>Melissa officinalis</i> L. | Lamiaceae | s pop BVA | Zitronenmelisse | svst_NER | p. 276           | Reizüberflutung, nervösem Kopfweh                                   |
| <i>Melissa officinalis</i> L. | Lamiaceae | s pop BVA | Zitronenmelisse | top_NER  | p. 276           | Nervenschmerzen, Kopfweh                                            |
| <i>Melissa officinalis</i> L. | Lamiaceae | s pop BVA | Zitronenmelisse | top_NER  | p. 276           | Nervosität, Schlaflosigkeit, Verkrampfungen                         |
| <i>Melissa officinalis</i> L. | Lamiaceae | s pop BVA | Zitronenmelisse | top_SKE  | p. 276           | Muskelskater, Rheuma                                                |
| <i>Melissa officinalis</i> L. | Lamiaceae | s pop BVA | Zitronenmelisse | syst_TON | p. 276           | Stärkung, Erfrischung                                               |
| <i>Melissa officinalis</i> L. | Lamiaceae | s pop JK  | Melisse         | syst_CAR | p. 397           | Herzstärkung, Herzbeklemmung, Schwindelgefühle                      |
| <i>Melissa officinalis</i> L. | Lamiaceae | s pop JK  | Melisse         | syst_CAR | p. 397           | Ohnmachten, Herzgeschichten                                         |
| <i>Melissa officinalis</i> L. | Lamiaceae | s pop JK  | Melisse         | top_DER  | p. 397           | allerlei Hautunreinigkeiten                                         |
| <i>Melissa officinalis</i> L. | Lamiaceae | s pop JK  | Melisse         | syst_GAS | p. 397           | Übelkeit                                                            |
| <i>Melissa officinalis</i> L. | Lamiaceae | s pop JK  | Melisse         | syst_NER | p. 397           | Schmermut, Migräne                                                  |
| <i>Melissa officinalis</i> L. | Lamiaceae | s pop UB  | Melisse         | top_DER  | p. 350           | Herpes labialis, Herpes simplex                                     |
| <i>Melissa officinalis</i> L. | Lamiaceae | s pop UB  | Melisse         | syst_GAS | p. 147           | akute Magenbeschwerden                                              |
| <i>Melissa officinalis</i> L. | Lamiaceae | s pop UB  | Melisse         | syst_GAS | p. 147           | akute Magenbeschwerden                                              |
| <i>Melissa officinalis</i> L. | Lamiaceae | s pop UB  | Melisse         | syst_GAS | p. 147           | akute Magenbeschwerden                                              |
| <i>Melissa officinalis</i> L. | Lamiaceae | s pop UB  | Melisse         | syst_GAS | p. 147           | akute Magenbeschwerden                                              |
| <i>Melissa officinalis</i> L. | Lamiaceae | s pop UB  | Melisse         | syst_NER | p. 422           | Spasmolytikum und Beruhigungsmittel                                 |
| <i>Melissa officinalis</i> L. | Lamiaceae | s pop UB  | Melisse         | top_NER  | p. 422           | Spasmolytikum und Beruhigungsmittel                                 |
| <i>Melissa officinalis</i> L. | Lamiaceae | s pop WI  | Melisse         | syst_CAR | p. 384           | Volksmedizin: funktioneller Kreislaufschwäche                       |
| <i>Melissa officinalis</i> L. | Lamiaceae | s pop WI  | Melisse         | syst_RES | p. 384           | Volksmedizin: Erkältungskrankheiten                                 |
| <i>Melissa officinalis</i> L. | Lamiaceae | sci_EMA   | Melisse         | syst_GAS | IMPC/196745/2012 | mild gastrointestinal complaints including bloating and flatulence  |
| <i>Melissa officinalis</i> L. | Lamiaceae | sci_EMA   | Melisse         | syst_GAS | IMPC/196745/2012 | mild gastrointestinal complaints including bloating and flatulence  |
| <i>Melissa officinalis</i> L. | Lamiaceae | sci_EMA   | Melisse         | syst_GAS | IMPC/196745/2012 | mild gastrointestinal complaints including bloating and flatulence  |
| <i>Melissa officinalis</i> L. | Lamiaceae | sci_EMA   | Melisse         | syst_NER | IMPC/196745/2012 | mental stress and to aid sleep                                      |
| <i>Melissa officinalis</i> L. | Lamiaceae | sci_EMA   | Melisse         | syst_NER | IMPC/196745/2012 | mental stress and to aid sleep                                      |
| <i>Melissa officinalis</i> L. | Lamiaceae | sci_EMA   | Melisse         | syst_NER | IMPC/196745/2012 | mental stress and to aid sleep                                      |
| <i>Melissa officinalis</i> L. | Lamiaceae | sci_ESCOP | Melissa folium  | syst_NER | IMPC/196745/2012 | mental stress and to aid sleep                                      |
| <i>Melissa officinalis</i> L. | Lamiaceae | sci_ESCOP | Melissa folium  | top_DER  | I p. 324         | Herpes labialis                                                     |
| <i>Mentha pulegium</i> L.     | Lamiaceae | ant_DIOS  | Poleiminze      | syst_ANT | 176              | hilft es mit Wein getrunken denen, die von giftigen Tieren gebissen |
| <i>Mentha pulegium</i> L.     | Lamiaceae | ant_DIOS  | Poleiminze      | vol_CAR  | 176              | Ohnmächtigen richtet es auf                                         |
| <i>Mentha pulegium</i> L.     | Lamiaceae | ant_DIOS  | Poleiminze      | top_DER  | 176              | besänftigt es jede Entzündung; bringt es Finnen weg                 |
| <i>Mentha pulegium</i> L.     | Lamiaceae | ant_DIOS  | Poleiminze      | top_DER  | 176              | gerieben und gebrannt macht es das Zahnfleisch fest                 |
| <i>Mentha pulegium</i> L.     | Lamiaceae | ant_DIOS  | Poleiminze      | top_DER  | 176              | zum Bade verwandt lindert Juckreiz                                  |
| <i>Mentha pulegium</i> L.     | Lamiaceae | ant_DIOS  | Poleiminze      | syst_GAS | 176              | stilt es Übelkeit und Magenschmerzen                                |
| <i>Mentha pulegium</i> L.     | Lamiaceae | ant_DIOS  | Poleiminze      | syst_GYN | 176              | Getrunken befördert es die Menstruation, treibt die Nachgeburt      |
| <i>Mentha pulegium</i> L.     | Lamiaceae | ant_DIOS  | Poleiminze      | top_GYN  | 176              | und die Leibesfrucht aus                                            |
| <i>Mentha pulegium</i> L.     | Lamiaceae | ant_DIOS  | Poleiminze      | top_GYN  | 176              | als Sitzbad ist sie ein gutes Mittel bei Aufblähung, Verhärtung und |
| <i>Mentha pulegium</i> L.     | Lamiaceae | ant_DIOS  | Poleiminze      | syst_NER | 176              | Umwendung der Gebärmutter.                                          |
| <i>Mentha pulegium</i> L.     | Lamiaceae | ant_DIOS  | Poleiminze      | top_OTH  | 176              | hilft bei Krämpfen                                                  |
| <i>Mentha pulegium</i> L.     | Lamiaceae | ant_DIOS  | Poleiminze      | syst_RES | 176              | Mit Salz umgeschlagen ist es Milzkranken heilsam                    |
| <i>Mentha pulegium</i> L.     | Lamiaceae | ant_DIOS  | Poleiminze      | top_SKE  | 176              | reinigt es die Lunge                                                |
| <i>Mentha pulegium</i> L.     | Lamiaceae | mon_HvB   | Poleiminze      | syst_EYE | 1-126            | und erhellt deine Augen                                             |
| <i>Mentha pulegium</i> L.     | Lamiaceae | mon_HvB   | Poleiminze      | top_EYE  | 1-126            | und wenn die Augen sich verdunkeln                                  |
| <i>Mentha pulegium</i> L.     | Lamiaceae | mon_HvB   | Poleiminze      | syst_GAS | 1-126            | es reinigt den Magen; der wärmt den Magen, wenn er einen kalten     |
| <i>Mentha pulegium</i> L.     | Lamiaceae | mon_HvB   | Poleiminze      | syst_GAS | 1-126            | Magen hat; Und auch wenn sein Magen voll von Gift ist, das ist      |
| <i>Mentha pulegium</i> L.     | Lamiaceae | mon_HvB   | Poleiminze      | top_NER  | 1-126            | Pol und der Wahnsinn in ihm wird unterdrückt                        |
| <i>Mentha pulegium</i> L.     | Lamiaceae | mon_HvB   | Poleiminze      | syst_ANT | 16               | widersteht sich den vergifteten Bissen von Schlangen                |
| <i>Mentha pulegium</i> L.     | Lamiaceae | mon_HvB   | Poleiminze      | syst_APH | 16               | erregt Liebeskraft                                                  |
| <i>Mentha pulegium</i> L.     | Lamiaceae | mon_HvB   | Poleiminze      | vol_CAR  | 16               | Ohnmacht (Fieber, heftiger Blutfluss)                               |
| <i>Mentha pulegium</i> L.     | Lamiaceae | mon_HvB   | Poleiminze      | top_DER  | 16               | stärkt und verfestigt man das Zahnfleisch                           |
| <i>Mentha pulegium</i> L.     | Lamiaceae | mon_HvB   | Poleiminze      | top_DER  | 16               | wird nicht am Jucken leiden                                         |
| <i>Mentha pulegium</i> L.     | Lamiaceae | mon_HvB   | Poleiminze      | top_DER  | 16               | trennt es den Grind vom Leib                                        |
| <i>Mentha pulegium</i> L.     | Lamiaceae | mon_HvB   | Poleiminze      | top_DER  | 16               | beseitigt sämtliche Geschwülste                                     |
| <i>Mentha pulegium</i> L.     | Lamiaceae | mon_HvB   | Poleiminze      | syst_GAS | 16               | Brechreiz oder beissender Magenschmerz                              |
| <i>Mentha pulegium</i> L.     | Lamiaceae | mon_HvB   | Poleiminze      | syst_GYN | 16               | Muttermilch im Überfluss                                            |
| <i>Mentha pulegium</i> L.     | Lamiaceae | mon_HvB   | Poleiminze      | syst_RES | 16               | zählebrige Säfte in der Brust verdünnen                             |
| <i>Mentha pulegium</i> L.     | Lamiaceae | mon_HvB   | Poleiminze      | top_SKE  | 16               | verkrüppelten oder verkrampften Gliedern helfen                     |
| <i>Mentha pulegium</i> L.     | Lamiaceae | mon_HvB   | Poleiminze      | top_SKE  | 16               | lindert Fussgicht                                                   |
| <i>Mentha pulegium</i> L.     | Lamiaceae | mon_HvB   | Poleiminze      | top_URO  | 16               | reichlich Harn zu lassen                                            |
| <i>Mentha pulegium</i> L.     | Lamiaceae | ren_LF    | Poleiminze      | syst_ANT | OX / LXIII       | von den giftigen Tieren gebissen sein                               |
| <i>Mentha pulegium</i> L.     | Lamiaceae | ren_LF    | Poleiminze      | vol_CAR  | OX / LXIII       | vor die nassen gehalten bringt herwider die so in onmacht fallen    |
| <i>Mentha pulegium</i> L.     | Lamiaceae | ren_LF    | Poleiminze      | top_DER  | OX / LXIII       | miltert er allerley brand                                           |
| <i>Mentha pulegium</i> L.     | Lamiaceae | ren_LF    | Poleiminze      | top_DER  | OX / LXIII       | sterckt das zahnfleisch                                             |
| <i>Mentha pulegium</i> L.     | Lamiaceae | ren_LF    | Poleiminze      | top_DER  | OX / LXIII       | legt das jucken der gilder                                          |
| <i>Mentha pulegium</i> L.     | Lamiaceae | ren_LF    | Poleiminze      | syst_GAS | OX / LXIII       | unwillen und das grimmen und nagen im magen schlund                 |
| <i>Mentha pulegium</i> L.     | Lamiaceae | ren_LF    | Poleiminze      | syst_GYN | OX / LXIII       | bringt den frauen ir krankhey, tribt aus das bürdlin und die geburt |
| <i>Mentha pulegium</i> L.     | Lamiaceae | ren_LF    | Poleiminze      | top_GYN  | OX / LXIII       | blasen, erte und den krampf der muter                               |
| <i>Mentha pulegium</i> L.     | Lamiaceae | ren_LF    | Poleiminze      | syst_NER | OX / LXIII       | fallende sucht                                                      |
| <i>Mentha pulegium</i> L.     | Lamiaceae | ren_LF    | Poleiminze      | top_NER  | OX / LXIII       | weetagen des haupt und den schwindel                                |
| <i>Mentha pulegium</i> L.     | Lamiaceae | ren_LF    | Poleiminze      | vol_NER  | OX / LXIII       | so ein kalt und feucht hirn haben                                   |
| <i>Mentha pulegium</i> L.     | Lamiaceae | ren_LF    | Poleiminze      | n.d. OTH | OX / LXIII       | ungesund wasser trinken muss                                        |
| <i>Mentha pulegium</i> L.     | Lamiaceae | ren_LF    | Poleiminze      | top_OTH  | OX / LXIII       | bekommt es wohl dem milzsüchtigen                                   |
| <i>Mentha pulegium</i> L.     | Lamiaceae | ren_LF    | Poleiminze      | syst_RES | OX / LXIII       | reiniget er die lungen                                              |
| <i>Mentha pulegium</i> L.     | Lamiaceae | ren_LF    | Poleiminze      | top_SKE  | OX / LXIII       | auch trefflich wohl dem hüftwee                                     |
| <i>Mentha pulegium</i> L.     | Lamiaceae | ren_LF    | Poleiminze      | top_SKE  | OX / LXIII       | podagrische glieder                                                 |
| <i>Mentha pulegium</i> L.     | Lamiaceae | ren_LF    | Poleiminze      | syst_URO | OX / LXIII       | treibt den harn und den stein der nieren                            |
| <i>Mentha pulegium</i> L.     | Lamiaceae | s pop VAL | Poleiminze      | syst_GAS | p. 428           | insuffisance biliaire, atonie gastrique                             |
| <i>Mentha pulegium</i> L.     | Lamiaceae | s pop VAL | Poleiminze      | syst_RES | p. 428           | bronchites, coqueluche                                              |
| <i>Mentha spicata</i> agg.    | Lamiaceae | ant_DIOS  | Minze           | top_ANT  | 177              | Kataplasma gegen Hundsbiß                                           |
| <i>Mentha spicata</i> agg.    | Lamiaceae | ant_DIOS  | Minze           | syst_APH | 177              | reizt zum Liebesgenuß                                               |
| <i>Mentha spicata</i> agg.    | Lamiaceae | ant_DIOS  | Minze           | top_DER  | 147              | gegen Wespen- und Bienenstiche                                      |
| <i>Mentha spicata</i> agg.    | Lamiaceae | ant_DIOS  | Minze           | top_DER  | 177              | zerteilt er Abszesse                                                |
| <i>Mentha spicata</i> agg.    | Lamiaceae | ant_DIOS  | Minze           | top_EAR  | 177              | Honigmeth stillt Ohrenschmerzen                                     |
| <i>Mentha spicata</i> agg.    | Lamiaceae | ant_DIOS  | Minze           | syst_GAS | 147              | stillen sie auch das Erbrechen                                      |
| <i>Mentha spicata</i> agg.    | Lamiaceae | ant_DIOS  | Minze           | syst_GAS | 177              | Überhaupt ist er dem Magen zuträglich und eine gute Wurze           |
| <i>Mentha spicata</i> agg.    | Lamiaceae | ant_DIOS  | Minze           | syst_GAS | 177              | stellt der Saft mit Essig getrunken den Blutausswurf                |
| <i>Mentha spicata</i> agg.    | Lamiaceae | ant_DIOS  | Minze           | syst_GAS | 177              | tötet ferner die runden Würmer                                      |
| <i>Mentha spicata</i> agg.    | Lamiaceae | ant_DIOS  | Minze           | syst_GAS | 177              | bringt das Schlucken, den Brechreiz und die Cholera zur Ruhe,       |
| <i>Mentha spicata</i> agg.    | Lamiaceae | ant_DIOS  | Minze           | top_GYN  | 177              | besänftigt geschwollene und (von Milch) strotzende Brüste           |
| <i>Mentha spicata</i> agg.    | Lamiaceae | ant_DIOS  | Minze           | top_GYN  | 177              | den Weibern aber vor dem Beischlaf im Zapfchen eingelegt            |
| <i>Mentha spicata</i> agg.    | Lamiaceae | ant_DIOS  | Minze           | top_GYN  | 177              | behindert er die Empfängnis                                         |
| <i>Mentha spicata</i> agg.    | Lamiaceae | ant_DIOS  | Minze           | top_NER  | 147              | gegen Kopfsiden auf die Schläfen und das Gesicht gelegt             |
| <i>Mentha spicata</i> agg.    | Lamiaceae | ant_DIOS  | Minze           | syst_NER | 147              | er beruhigt auch Krämpfe und Schlucken                              |
| <i>Mentha spicata</i> agg.    | Lamiaceae | ant_DIOS  | Minze           | top_NER  | 177              | auf die Stirn gelegt lindert er Kopfschmerzen                       |
| <i>Mentha spicata</i> agg.    | Lamiaceae | ant_DIOS  | Minze           | syst_URO | 147              | ist bei Harnzwang und Blasenstein                                   |
| <i>Mentha spicata</i> agg.    | Lamiaceae | mon_HvB   | Wilde Minze     | top_DER  | 1-76             | Kratzmilben                                                         |
| <i>Mentha spicata</i> agg.    | Lamiaceae | mon_HvB   | Ackerminze      | top_EYE  | 1-77             | Augengeschwür                                                       |
| <i>Mentha spicata</i> agg.    | Lamiaceae | mon_HvB   | Bachminze       | syst_GAS | 1-75             | Magen von vielen Speisen beschwert                                  |
| <i>Mentha spicata</i> agg.    | Lamiaceae | mon_HvB   | Krauseminze     | syst_GAS | 1-78             | kalter Magen                                                        |
| <i>Mentha spicata</i> agg.    | Lamiaceae | mon_HvB   | Ackerminze      | top_GAS  | 1-77             | kalter Magen                                                        |
| <i>Mentha spicata</i> agg.    | Lamiaceae | mon_HvB   | Bachminze       | syst_RES | 1-75             | kranke Lunge, nur schwer atmet                                      |



|                     |           |       |     |              |      |     |                    |                                                                   |
|---------------------|-----------|-------|-----|--------------|------|-----|--------------------|-------------------------------------------------------------------|
| Mentha spicata agg. | Lamiaceae | mon   | HvB | Krauseminze  | syst | SKE | 1-78               | Gicht                                                             |
| Mentha spicata agg. | Lamiaceae | mon   | MF  | Minze        | top  | DER | 47                 | Hundebiss, so heilt sie ihn                                       |
| Mentha spicata agg. | Lamiaceae | mon   | MF  | Minze        | top  | DER | 47                 | raue Zunge wird glatt                                             |
| Mentha spicata agg. | Lamiaceae | mon   | MF  | Minze        | top  | EAR | 47                 | Ohr, vertreiben den Schmerz                                       |
| Mentha spicata agg. | Lamiaceae | mon   | MF  | Minze        | syst | GAS |                    | fördert die Verdauungskraft, stärkt den Magen, hält den Brechreiz |
| Mentha spicata agg. | Lamiaceae | mon   | MF  | Minze        | syst | GAS | 47                 | fern und soll die Spulwürmer vertreiben                           |
| Mentha spicata agg. | Lamiaceae | mon   | MF  | Minze        | syst | GAS | 47                 | verhilft sie den Blutspeien                                       |
| Mentha spicata agg. | Lamiaceae | mon   | MF  | Minze        | syst | GYN | 47                 | Kindsgeburts zu beschleunigen                                     |
| Mentha spicata agg. | Lamiaceae | mon   | MF  | Minze        | top  | GYN | 47                 | ... bevor ein Beischlaf stattfindet, kann die Frau dabei nicht    |
| Mentha spicata agg. | Lamiaceae | mon   | MF  | Minze        | top  | GYN | 47                 | empfangen                                                         |
| Mentha spicata agg. | Lamiaceae | mon   | MF  | Minze        | top  | GYN | 47                 | stockt die Milch in den Brüsten                                   |
| Mentha spicata agg. | Lamiaceae | mon   | MF  | Minze        | syst | URO | 47                 | verschiedene Leiden der Hoden                                     |
| Mentha spicata agg. | Lamiaceae | ren   | LF  | Minze        | syst | APH | CLXI - CLXIII / CX | reizt zur unkeuschheit                                            |
| Mentha spicata agg. | Lamiaceae | ren   | LF  | Minze        | top  | DER | CLXI - CLXIII / CX | zertreiben sie die geschwulst                                     |
| Mentha spicata agg. | Lamiaceae | ren   | LF  | Minze        | top  | DER | CLXI - CLXIII / CX | vertreiben sie der raue der zunge                                 |
| Mentha spicata agg. | Lamiaceae | ren   | LF  | Minze        | top  | DER | CLXI - CLXIII / CX | heilen die geschwulst am kopf der jungen kinder und die flechten  |
| Mentha spicata agg. | Lamiaceae | ren   | LF  | Minze        | top  | EAR | CLXI - CLXIII / CX | benimmt den weetaugen                                             |
| Mentha spicata agg. | Lamiaceae | ren   | LF  | Minze        | n.d. | GAS | CLXI - CLXIII / CX | dienstlich der kalten leber, stecken den magen und die dewung     |
| Mentha spicata agg. | Lamiaceae | ren   | LF  | Minze        | syst | GAS | CLXI - CLXIII / CX | macht begierig zu essen                                           |
| Mentha spicata agg. | Lamiaceae | ren   | LF  | Minze        | syst | GAS | CLXI - CLXIII / CX | vertreiben sie das grimmen und weetaugen der daerm                |
| Mentha spicata agg. | Lamiaceae | ren   | LF  | Minze        | syst | GAS | CLXI - CLXIII / CX | hergen und würgen / Cholera genannt das ist so unden und oben     |
| Mentha spicata agg. | Lamiaceae | ren   | LF  | Minze        | syst | GAS | CLXI - CLXIII / CX | die gall von einem geet / ser dienstlich dem magen                |
| Mentha spicata agg. | Lamiaceae | ren   | LF  | Minze        | syst | GAS | CLXI - CLXIII / CX | toedtet die runden wuerm                                          |
| Mentha spicata agg. | Lamiaceae | ren   | LF  | Minze        | syst | GYN | CLXI - CLXIII / CX | stellen auch der frauen krankheit                                 |
| Mentha spicata agg. | Lamiaceae | ren   | LF  | Minze        | syst | GYN | CLXI - CLXIII / CX | kommen sie zuhilff den frauen so schwaer gebaeren                 |
| Mentha spicata agg. | Lamiaceae | ren   | LF  | Minze        | top  | GYN | CLXI - CLXIII / CX | vertreiben die milch                                              |
| Mentha spicata agg. | Lamiaceae | ren   | LF  | Minze        | top  | NER | CLXI - CLXIII / CX | milern sie das hauptwee                                           |
| Mentha spicata agg. | Lamiaceae | ren   | LF  | Minze        | vol  | NER | CLXI - CLXIII / CX | macht mut und froelich                                            |
| Mentha spicata agg. | Lamiaceae | ren   | LF  | Minze        | syst | OTH | CLXI - CLXIII / CX | stellt das blut                                                   |
| Mentha spicata agg. | Lamiaceae | ren   | LF  | Minze        | syst | RES | CLXI - CLXIII / CX | stillen sie das blutspeien                                        |
| Mentha spicata agg. | Lamiaceae | s pop | BVA | Pfefferminze | syst | CAR | p. 164             | Reisekrankheit                                                    |
| Mentha spicata agg. | Lamiaceae | s pop | BVA | Pfefferminze | top  | DER | p. 164             | Hautjucken, Mundspülung, wunde Zunge                              |
| Mentha spicata agg. | Lamiaceae | s pop | BVA | Pfefferminze | syst | GAS | p. 164             | ungenügende Gallenabsonderung, Reisebeschwerden, Übelkeit,        |
| Mentha spicata agg. | Lamiaceae | s pop | BVA | Pfefferminze | syst | GAS | p. 164             | Erbrechen, Krämpfen im Unterleib und Verdauungsorganen,           |
| Mentha spicata agg. | Lamiaceae | s pop | BVA | Pfefferminze | syst | GAS | p. 164             | Magenverstopfung, Übersäuerungdes Magens, Appetitlosigkeit        |
| Mentha spicata agg. | Lamiaceae | s pop | BVA | Pfefferminze | syst | GYN | p. 164             | Reisebeschwerden                                                  |
| Mentha spicata agg. | Lamiaceae | s pop | BVA | Pfefferminze | top  | NER | p. 164             | Neuralgien, Kopfw                                                 |
| Mentha spicata agg. | Lamiaceae | s pop | JK  | Minzen       | syst | CAR | p. 398             | stark Herz                                                        |
| Mentha spicata agg. | Lamiaceae | s pop | JK  | Minzen       | syst | CAR | p. 398             | Herzanfällen                                                      |
| Mentha spicata agg. | Lamiaceae | s pop | JK  | Minzen       | syst | GAS | p. 398             | stärkt Magen                                                      |
| Mentha spicata agg. | Lamiaceae | s pop | JK  | Minzen       | syst | GAS | p. 398             | Kolik                                                             |
| Mentha spicata agg. | Lamiaceae | s pop | JK  | Minzen       | top  | HUM | p. 398             | Fusschweiss wecken                                                |
| Mentha spicata agg. | Lamiaceae | s pop | JK  | Minzen       | syst | NER | p. 398             | Schwindel, Bewusstlosigkeit, Migräne                              |
| Mentha spicata agg. | Lamiaceae | s pop | JK  | Minzen       | syst | RES | p. 398             | Keuchen und schwerer Atem                                         |
| Mentha spicata agg. | Lamiaceae | s pop | JK  | Minzen       | syst | RES | p. 398             | Unwohlsein und Übelkeit                                           |
| Mentha spicata agg. | Lamiaceae | s pop | JK  | Minzen       | top  | RES | p. 398             | nehmen Schnupfen und Kopfw                                        |
| Mentha spicata agg. | Lamiaceae | s pop | JK  | Minzen       | syst | URO | p. 398             | fördert den Wasserabgang                                          |
| Mentha spicata agg. | Lamiaceae | s pop | JK  | Minzen       | top  | URO | p. 398             | Leute, die den Urin nicht halten können                           |
| Mentha spicata agg. | Lamiaceae | s pop | KN  | Minze        | syst | GAS | p. 479             | Koliken und blähungstreibendes Mittel                             |
| Mentha spicata agg. | Lamiaceae | s pop | KN  | Minze        | syst | GAS | p. 479             | Magen stärken und Verdauung fördern; Leber- Gallestörungen;       |
| Mentha spicata agg. | Lamiaceae | s pop | KN  | Minze        | syst | GAS | p. 479             | fördert die Verdauung                                             |
| Mentha spicata agg. | Lamiaceae | s pop | KN  | Minze        | syst | GAS | p. 479             | übel- und faulriechenden Atem                                     |
| Mentha spicata agg. | Lamiaceae | s pop | KN  | Minze        | syst | GAS | p. 479             | Blutbrechen                                                       |
| Mentha spicata agg. | Lamiaceae | s pop | KN  | Minze        | syst | GYN | p. 479             | Unterleibsschmerzen                                               |
| Mentha spicata agg. | Lamiaceae | s pop | KN  | Minze        | top  | NER | p. 479             | bei Kopfschmerzen und örtlichen Schmerzen und Neuralgien          |
| Mentha spicata agg. | Lamiaceae | s pop | KN  | Minze        | top  | NER | p. 479             | bei Kopfschmerzen und örtlichen Schmerzen und Neuralgien          |
| Mentha spicata agg. | Lamiaceae | s pop | KN  | Minze        | top  | NER | p. 479             | bei Kopfschmerzen und örtlichen Schmerzen und Neuralgien          |
| Mentha spicata agg. | Lamiaceae | s pop | KN  | Minze        | top  | NER | p. 479             | bei Kopfschmerzen und örtlichen Schmerzen und Neuralgien          |
| Mentha spicata agg. | Lamiaceae | s pop | KN  | Minze        | top  | NER | p. 479             | bei Kopfschmerzen und örtlichen Schmerzen und Neuralgien          |
| Mentha spicata agg. | Lamiaceae | s pop | KN  | Minze        | top  | NER | p. 479             | bei Kopfschmerzen und örtlichen Schmerzen und Neuralgien          |
| Mentha spicata agg. | Lamiaceae | s pop | KN  | Minze        | top  | NER | p. 479             | bei Kopfschmerzen und örtlichen Schmerzen und Neuralgien          |
| Mentha spicata agg. | Lamiaceae | s pop | KN  | Minze        | top  | NER | p. 479             | bei Kopfschmerzen und örtlichen Schmerzen und Neuralgien          |
| Mentha spicata agg. | Lamiaceae | s pop | KN  | Minze        | top  | NER | p. 479             | bei Kopfschmerzen und örtlichen Schmerzen und Neuralgien          |
| Mentha spicata agg. | Lamiaceae | s pop | KN  | Minze        | top  | NER | p. 479             | bei Kopfschmerzen und örtlichen Schmerzen und Neuralgien          |
| Mentha spicata agg. | Lamiaceae | s pop | KN  | Minze        | top  | NER | p. 479             | bei Kopfschmerzen und örtlichen Schmerzen und Neuralgien          |
| Mentha spicata agg. | Lamiaceae | s pop | KN  | Minze        | top  | NER | p. 479             | bei Kopfschmerzen und örtlichen Schmerzen und Neuralgien          |
| Mentha spicata agg. | Lamiaceae | s pop | KN  | Minze        | top  | NER | p. 479             | bei Kopfschmerzen und örtlichen Schmerzen und Neuralgien          |
| Mentha spicata agg. | Lamiaceae | s pop | KN  | Minze        | top  | NER | p. 479             | bei Kopfschmerzen und örtlichen Schmerzen und Neuralgien          |
| Mentha spicata agg. | Lamiaceae | s pop | KN  | Minze        | top  | NER | p. 479             | bei Kopfschmerzen und örtlichen Schmerzen und Neuralgien          |
| Mentha spicata agg. | Lamiaceae | s pop | KN  | Minze        | top  | NER | p. 479             | bei Kopfschmerzen und örtlichen Schmerzen und Neuralgien          |
| Mentha spicata agg. | Lamiaceae | s pop | KN  | Minze        | top  | NER | p. 479             | bei Kopfschmerzen und örtlichen Schmerzen und Neuralgien          |
| Mentha spicata agg. | Lamiaceae | s pop | KN  | Minze        | top  | NER | p. 479             | bei Kopfschmerzen und örtlichen Schmerzen und Neuralgien          |
| Mentha spicata agg. | Lamiaceae | s pop | KN  | Minze        | top  | NER | p. 479             | bei Kopfschmerzen und örtlichen Schmerzen und Neuralgien          |
| Mentha spicata agg. | Lamiaceae | s pop | KN  | Minze        | top  | NER | p. 479             | bei Kopfschmerzen und örtlichen Schmerzen und Neuralgien          |
| Mentha spicata agg. | Lamiaceae | s pop | KN  | Minze        | top  | NER | p. 479             | bei Kopfschmerzen und örtlichen Schmerzen und Neuralgien          |
| Mentha spicata agg. | Lamiaceae | s pop | KN  | Minze        | top  | NER | p. 479             | bei Kopfschmerzen und örtlichen Schmerzen und Neuralgien          |
| Mentha spicata agg. | Lamiaceae | s pop | KN  | Minze        | top  | NER | p. 479             | bei Kopfschmerzen und örtlichen Schmerzen und Neuralgien          |
| Mentha spicata agg. | Lamiaceae | s pop | KN  | Minze        | top  | NER | p. 479             | bei Kopfschmerzen und örtlichen Schmerzen und Neuralgien          |
| Mentha spicata agg. | Lamiaceae | s pop | KN  | Minze        | top  | NER | p. 479             | bei Kopfschmerzen und örtlichen Schmerzen und Neuralgien          |
| Mentha spicata agg. | Lamiaceae | s pop | KN  | Minze        | top  | NER | p. 479             | bei Kopfschmerzen und örtlichen Schmerzen und Neuralgien          |
| Mentha spicata agg. | Lamiaceae | s pop | KN  | Minze        | top  | NER | p. 479             | bei Kopfschmerzen und örtlichen Schmerzen und Neuralgien          |
| Mentha spicata agg. | Lamiaceae | s pop | KN  | Minze        | top  | NER | p. 479             | bei Kopfschmerzen und örtlichen Schmerzen und Neuralgien          |
| Mentha spicata agg. | Lamiaceae | s pop | KN  | Minze        | top  | NER | p. 479             | bei Kopfschmerzen und örtlichen Schmerzen und Neuralgien          |
| Mentha spicata agg. | Lamiaceae | s pop | KN  | Minze        | top  | NER | p. 479             | bei Kopfschmerzen und örtlichen Schmerzen und Neuralgien          |
| Mentha spicata agg. | Lamiaceae | s pop | KN  | Minze        | top  | NER | p. 479             | bei Kopfschmerzen und örtlichen Schmerzen und Neuralgien          |
| Mentha spicata agg. | Lamiaceae | s pop | KN  | Minze        | top  | NER | p. 479             | bei Kopfschmerzen und örtlichen Schmerzen und Neuralgien          |
| Mentha spicata agg. | Lamiaceae | s pop | KN  | Minze        | top  | NER | p. 479             | bei Kopfschmerzen und örtlichen Schmerzen und Neuralgien          |
| Mentha spicata agg. | Lamiaceae | s pop | KN  | Minze        | top  | NER | p. 479             | bei Kopfschmerzen und örtlichen Schmerzen und Neuralgien          |
| Mentha spicata agg. | Lamiaceae | s pop | KN  | Minze        | top  | NER | p. 479             | bei Kopfschmerzen und örtlichen Schmerzen und Neuralgien          |
| Mentha spicata agg. | Lamiaceae | s pop | KN  | Minze        | top  | NER | p. 479             | bei Kopfschmerzen und örtlichen Schmerzen und Neuralgien          |
| Mentha spicata agg. | Lamiaceae | s pop | KN  | Minze        | top  | NER | p. 479             | bei Kopfschmerzen und örtlichen Schmerzen und Neuralgien          |
| Mentha spicata agg. | Lamiaceae | s pop | KN  | Minze        | top  | NER | p. 479             | bei Kopfschmerzen und örtlichen Schmerzen und Neuralgien          |
| Mentha spicata agg. | Lamiaceae | s pop | KN  | Minze        | top  | NER | p. 479             | bei Kopfschmerzen und örtlichen Schmerzen und Neuralgien          |
| Mentha spicata agg. | Lamiaceae | s pop | KN  | Minze        | top  | NER | p. 479             | bei Kopfschmerzen und örtlichen Schmerzen und Neuralgien          |
| Mentha spicata agg. | Lamiaceae | s pop | KN  | Minze        | top  | NER | p. 479             | bei Kopfschmerzen und örtlichen Schmerzen und Neuralgien          |
| Mentha spicata agg. | Lamiaceae | s pop | KN  | Minze        | top  | NER | p. 479             | bei Kopfschmerzen und örtlichen Schmerzen und Neuralgien          |
| Mentha spicata agg. | Lamiaceae | s pop | KN  | Minze        | top  | NER | p. 479             | bei Kopfschmerzen und ört                                         |

|                               |            |       |      |              |      |      |                      |                                                                      |
|-------------------------------|------------|-------|------|--------------|------|------|----------------------|----------------------------------------------------------------------|
| <i>Morus nigra</i> L.         | Moraceae   | ant   | DIOS | Maulbeere    | svst | DER  | 112                  | Geschwüre öffnet                                                     |
| <i>Morus nigra</i> L.         | Moraceae   | ant   | DIOS | Maulbeere    | svst | GAS  | 112                  | wirkt er gegen Flüsse                                                |
| <i>Morus nigra</i> L.         | Moraceae   | ant   | DIOS | Maulbeere    | syst | GAS  | 112                  | Magenkranken                                                         |
| <i>Morus nigra</i> L.         | Moraceae   | ant   | DIOS | Maulbeere    | syst | GAS  | 112                  | lost den Bauch, treibt den Bandwurm                                  |
| <i>Morus nigra</i> L.         | Moraceae   | ant   | DIOS | Maulbeere    | syst | GAS  | 112                  | den Bauch reinigt                                                    |
| <i>Morus nigra</i> L.         | Moraceae   | ant   | DIOS | Maulbeere    | top  | OTH  | 112                  | farben sie die Haare                                                 |
| <i>Morus nigra</i> L.         | Moraceae   | ant   | DIOS | Maulbeere    | top  | TEE  | 112                  | als Mundwasser bei Zahnschmerzen                                     |
| <i>Morus nigra</i> L.         | Moraceae   | ant   | DIOS | Maulbeere    | syst | TEE  | 112                  | welche gegen Zahnschmerzen wirksam                                   |
| <i>Morus nigra</i> L.         | Moraceae   | mon   | HvB  | Maulbeerbaum | syst | ANT  | 3-9                  | Und wer Gift durch Essen oder Trinken eingenommen hat                |
| <i>Morus nigra</i> L.         | Moraceae   | mon   | HvB  | Maulbeerbaum | top  | DER  | 3-9                  | und wer die Krätze hat                                               |
|                               |            |       |      |              |      |      |                      | Und es ist Üppigkeit in seiner Frucht, . . . . Aber sie nützt dem    |
| <i>Morus nigra</i> L.         | Moraceae   | mon   | HvB  | Maulbeerbaum | syst | OTH  | 3-9                  | Menschen mehr als sie ihm schadet                                    |
|                               |            |       |      |              |      |      |                      | treibt hinder sich die flüss und geschwulst der mandeln, er ist auch |
| <i>Morus nigra</i> L.         | Moraceae   | ren   | LF   | Maulbeere    | syst | DER  | CCXCV / CXCVIII      | nüt zu anderen gebresten des munds                                   |
| <i>Morus nigra</i> L.         | Moraceae   | ren   | LF   | Maulbeere    | top  | DER  | CCXCV / CXCVIII      | heilen den brand                                                     |
| <i>Morus nigra</i> L.         | Moraceae   | ren   | LF   | Maulbeere    | syst | GAS  | CCXCV / CXCVIII      | lindert den Bauch, stellen den Bauchfluss                            |
| <i>Morus nigra</i> L.         | Moraceae   | ren   | LF   | Maulbeere    | syst | GAS  | CCXCV / CXCVIII      | lindert den Bauch                                                    |
| <i>Morus nigra</i> L.         | Moraceae   | ren   | LF   | Maulbeere    | syst | OTH  | CCXCV / CXCVIII      | treibt auch aus . . . . Die breyen wurm des bauchs                   |
| <i>Morus nigra</i> L.         | Moraceae   | ren   | LF   | Maulbeere    | top  | TEE  | CCXCV / CXCVIII      | legt das ranwee                                                      |
| <i>Morus nigra</i> L.         | Moraceae   | s pop | VAL  | Maulbeere    | syst | OTH  | p. 378               | diabète                                                              |
| <i>Morus nigra</i> L.         | Moraceae   | s pop | VAL  | Maulbeere    | top  | RES  | p. 378               | gargarisme dans les angines, et en bains de bouche dans la           |
|                               |            |       |      |              |      |      |                      | stomatites et aphtes                                                 |
| <i>Ocimum basilicum</i> L.    | Lamiaceae  | ant   | DIOS | Basilikum    | top  | ANT  | 150                  | den Biss des Meerdrachen und des Skorpions                           |
| <i>Ocimum basilicum</i> L.    | Lamiaceae  | ant   | DIOS | Basilikum    | syst | EYE  | 150                  | dient es gegen Augenleiden                                           |
|                               |            |       |      |              |      |      |                      | Sein Saft entfernt Nebelflecken auf den Augen und trocknet die       |
| <i>Ocimum basilicum</i> L.    | Lamiaceae  | ant   | DIOS | Basilikum    | top  | EYE  | 150                  | Flüsse                                                               |
| <i>Ocimum basilicum</i> L.    | Lamiaceae  | ant   | DIOS | Basilikum    | syst | GAS  | 150                  | es erweicht den Bauch, treibt die Winde                              |
| <i>Ocimum basilicum</i> L.    | Lamiaceae  | ant   | DIOS | Basilikum    | syst | GAS  | 150                  | Blähungen                                                            |
| <i>Ocimum basilicum</i> L.    | Lamiaceae  | ant   | DIOS | Basilikum    | syst | GYN  | 150                  | befördert die Milchabsonderung                                       |
| <i>Ocimum basilicum</i> L.    | Lamiaceae  | ant   | DIOS | Basilikum    | syst | NER  | 150                  | gutes Mittel bei Melancholie                                         |
| <i>Ocimum basilicum</i> L.    | Lamiaceae  | ant   | DIOS | Basilikum    | top  | OTH  | 150                  | verursacht er vieles Niesen                                          |
| <i>Ocimum basilicum</i> L.    | Lamiaceae  | ant   | DIOS | Basilikum    | top  | RES  | 150                  | heilt es Lungenentzündung                                            |
| <i>Ocimum basilicum</i> L.    | Lamiaceae  | ant   | DIOS | Basilikum    | syst | URO  | 150                  | treibt [die Winde und] den Harn                                      |
| <i>Ocimum basilicum</i> L.    | Lamiaceae  | ant   | DIOS | Basilikum    | syst | URO  | 150                  | Harnverhaltung                                                       |
| <i>Ocimum basilicum</i> L.    | Lamiaceae  | mon   | HvB  | Basilikum    | syst | FEV  | 1-230                | wer starke Fieber hat                                                |
| <i>Ocimum basilicum</i> L.    | Lamiaceae  | mon   | HvB  | Basilikum    | syst | SKE  | 1-230                | Lähmung an seiner Zunge, dass er nicht Sprechen kann                 |
| <i>Ocimum basilicum</i> L.    | Lamiaceae  | ren   | LF   | Basilikum    | top  | ANT  | VIII - CCXX / CCVIII | trefflich gut so denen von einem scorpien gestochen sind             |
| <i>Ocimum basilicum</i> L.    | Lamiaceae  | ren   | LF   | Basilikum    | vol  | CAR  | VIII - CCXX / CCVIII | bring er herwider, die so in onmacht liegen                          |
| <i>Ocimum basilicum</i> L.    | Lamiaceae  | ren   | LF   | Basilikum    | top  | DER  | VIII - CCXX / CCVIII | verzert und zeitigt auch allerley geschwulst                         |
|                               |            |       |      |              |      |      |                      | leschen alle hitz und weetagen der augen, saft in die augen gethon   |
| <i>Ocimum basilicum</i> L.    | Lamiaceae  | ren   | LF   | Basilikum    | top  | EYE  | VIII - CCXX / CCVIII | vertreibt die dunkelheyt                                             |
|                               |            |       |      |              |      |      |                      | weychen den bauch, machen blaest, werden im magen leichtlich         |
| <i>Ocimum basilicum</i> L.    | Lamiaceae  | ren   | LF   | Basilikum    | syst | GAS  | VIII - CCXX / CCVIII | verwandelt                                                           |
| <i>Ocimum basilicum</i> L.    | Lamiaceae  | ren   | LF   | Basilikum    | syst | GYN  | VIII - CCXX / CCVIII | bringen Milch                                                        |
| <i>Ocimum basilicum</i> L.    | Lamiaceae  | ren   | LF   | Basilikum    | syst | GYN  | VIII - CCXX / CCVIII | fürdet die zeit der frawen                                           |
| <i>Ocimum basilicum</i> L.    | Lamiaceae  | ren   | LF   | Basilikum    | n.d. | NER  | VIII - CCXX / CCVIII | sterckt das haupt und das herz                                       |
| <i>Ocimum basilicum</i> L.    | Lamiaceae  | ren   | LF   | Basilikum    | n.d. | NER  | VIII - CCXX / CCVIII | macht freud denen so von der Schwarzen galle in traurigkeyt fallen   |
| <i>Ocimum basilicum</i> L.    | Lamiaceae  | ren   | LF   | Basilikum    | syst | URO  | VIII - CCXX / CCVIII | treiben den harn                                                     |
| <i>Ocimum basilicum</i> L.    | Lamiaceae  | ren   | LF   | Basilikum    | syst | URO  | VIII - CCXX / CCVIII | treibt den harn                                                      |
| <i>Ocimum basilicum</i> L.    | Lamiaceae  | s pop | WI   | Basilikum    | top  | DER  | p. 105               | Volksmedizin: Entzündungen des Rachenraums                           |
| <i>Ocimum basilicum</i> L.    | Lamiaceae  | s pop | WI   | Basilikum    | top  | DER  | p. 105               | Volksmedizin: schlecht heilende Wunden                               |
| <i>Ocimum basilicum</i> L.    | Lamiaceae  | s pop | WI   | Basilikum    | syst | GAS  | p. 105               | Volksmedizin: Stomatium bei Appetitlosigkeit                         |
| <i>Ocimum basilicum</i> L.    | Lamiaceae  | s pop | WI   | Basilikum    | syst | GYN  | p. 105               | Volksmedizin: Galaktagogum                                           |
| <i>Ocimum basilicum</i> L.    | Lamiaceae  | s pop | WI   | Basilikum    | syst | URO  | p. 105               | Volksmedizin: Diureum                                                |
| <i>Onopordum acanthium</i> L. | Asteraceae | ant   | DIOS | Eselsdistel  | syst | SKE  | 171                  | sind im Trank bei Opisthotonie heilsam                               |
| <i>Onopordum acanthium</i> L. | Asteraceae | mon   | LO   | Eselsdistel  | syst | OTH  | n.d.                 | n.d.                                                                 |
|                               |            |       |      |              |      |      |                      | [gut den jungen kindern] unnd denen so von den natern gebissen       |
| <i>Onopordum acanthium</i> L. | Asteraceae | ren   | LF   | Eselsdistel  | syst | ANT  | XXXI - XXXII / XVI   | seind                                                                |
| <i>Onopordum acanthium</i> L. | Asteraceae | ren   | LF   | Eselsdistel  | syst | ANT  | XXXI - XXXII / XVI   | widerstehet auch allem anderen gift                                  |
|                               |            |       |      |              |      |      |                      | auch denen so einen bloeden magen haben un die speiss nit wol        |
| <i>Onopordum acanthium</i> L. | Asteraceae | ren   | LF   | Eselsdistel  | syst | GAS  | XXXI - XXXII / XVI   | behalten moegen                                                      |
| <i>Onopordum acanthium</i> L. | Asteraceae | ren   | LF   | Eselsdistel  | syst | RES  | XXXI - XXXII / XVI   | gut denen so blut aussreisern                                        |
| <i>Onopordum acanthium</i> L. | Asteraceae | ren   | LF   | Eselsdistel  | syst | SKE  | XXXI - XXXII / XVI   | gut den jungen kindern so it dem gicht oder freysch beladen          |
| <i>Onopordum acanthium</i> L. | Asteraceae | ren   | LF   | Eselsdistel  | syst | TEE  | XXXI - XXXII / XVI   | legt das ranwee                                                      |
| <i>Onopordum acanthium</i> L. | Asteraceae | ren   | LF   | Eselsdistel  | syst | URO  | XXXI - XXXII / XVI   | treibt auch den harn                                                 |
| <i>Onopordum acanthium</i> L. | Asteraceae | ren   | LF   | Eselsdistel  | syst | URO  | XXXI - XXXII / XVI   | so mans überstreicht vertreibt sie die geschwulst                    |
| <i>Onopordum acanthium</i> L. | Asteraceae | s pop | MA   | Eselsdistel  | hom  | DER  |                      | veralteten Ulzera, Lupus und Skrofulose; Hautkarzinom (nicht erste W |
| <i>Origanum vulgare</i> aggr. | Lamiaceae  | ant   | DIOS | Dost         | syst | ANT  | 176                  | helfen gegen den Biß giftiger Tiere                                  |
| <i>Origanum vulgare</i> aggr. | Lamiaceae  | mon   | HvB  | Dost         | top  | DER  | 1-112                | rote Lepra                                                           |
| <i>Origanum vulgare</i> aggr. | Lamiaceae  | mon   | HvB  | Dost         | syst | FEV  | 1-112                | tägliches Fieber                                                     |
|                               |            |       |      |              |      |      |                      | heilt alle verderblichen Bisse, falls jemand Aconitum genossen hat,  |
| <i>Origanum vulgare</i> aggr. | Lamiaceae  | mon   | MF   | Dost         | syst | ANT  | 38                   | widersetzt sich vielen anderen Giften                                |
| <i>Origanum vulgare</i> aggr. | Lamiaceae  | mon   | MF   | Dost         | syst | DER  | 38                   | heilt er Wunden im Mund                                              |
| <i>Origanum vulgare</i> aggr. | Lamiaceae  | mon   | MF   | Dost         | syst | DER  | 38                   | vertröcknet Geschwülste                                              |
| <i>Origanum vulgare</i> aggr. | Lamiaceae  | mon   | MF   | Dost         | top  | DER  | 38                   | Juckreiz, Kopfschind, und Maie auf der Haut                          |
| <i>Origanum vulgare</i> aggr. | Lamiaceae  | mon   | MF   | Dost         | top  | EAR  | 38                   | stilt er Ohrenschmerz                                                |
| <i>Origanum vulgare</i> aggr. | Lamiaceae  | mon   | MF   | Dost         | syst | GAS  | 38                   | zögerliche Verdauung                                                 |
| <i>Origanum vulgare</i> aggr. | Lamiaceae  | mon   | MF   | Dost         | top  | GAS  | 38                   | bessert die Gelbsucht                                                |
| <i>Origanum vulgare</i> aggr. | Lamiaceae  | mon   | MF   | Dost         | syst | GAS  | 38                   | befördert die Spulwürmer hinaus                                      |
| <i>Origanum vulgare</i> aggr. | Lamiaceae  | mon   | MF   | Dost         | syst | GYN  | 38                   | mindert er überstarken Monatsfluss                                   |
| <i>Origanum vulgare</i> aggr. | Lamiaceae  | mon   | MF   | Dost         | top  | GYN  | 38                   | mindert er überstarken Monatsfluss                                   |
| <i>Origanum vulgare</i> aggr. | Lamiaceae  | mon   | MF   | Dost         | top  | HUM  | 38                   | zwingt er böses Blut im Kopf hinauszufliessen                        |
| <i>Origanum vulgare</i> aggr. | Lamiaceae  | mon   | MF   | Dost         | syst | RES  | 38                   | treibt er Husten zurück                                              |
| <i>Origanum vulgare</i> aggr. | Lamiaceae  | mon   | MF   | Dost         | syst | RES  | 38                   | heilt er Schwellungen des Rachenröhrens und des Schlundes            |
| <i>Origanum vulgare</i> aggr. | Lamiaceae  | mon   | MF   | Dost         | syst | SKE  | 38                   | heilt er Prellungen                                                  |
| <i>Origanum vulgare</i> aggr. | Lamiaceae  | mon   | MF   | Dost         | top  | SKE  | 38                   | verrenkten und zerstossenen Gliedern                                 |
| <i>Origanum vulgare</i> aggr. | Lamiaceae  | mon   | MF   | Dost         | top  | TEE  | 38                   | pflügt er den Zahnschmerz zu verjagen                                |
| <i>Origanum vulgare</i> aggr. | Lamiaceae  | mon   | MF   | Dost         | syst | URO  | 38                   | zähmt er die Wassersucht                                             |
| <i>Origanum vulgare</i> aggr. | Lamiaceae  | mon   | MF   | Dost         | syst | URO  | 38                   | treibt er den Harn                                                   |
|                               |            |       |      |              |      |      |                      | ist nützlich denen von den giftigen thieren gebissen sind, mit       |
|                               |            |       |      |              |      |      |                      | süßem wein denen si Schirling oder den Saft von Magsamen geseh       |
| <i>Origanum vulgare</i> aggr. | Lamiaceae  | ren   | LF   | Dost         | syst | ANT  | CCCXI / XXIX         | oder ingonnen haben, / Gyps oder Zeitlosen gegessen                  |
| <i>Origanum vulgare</i> aggr. | Lamiaceae  | ren   | LF   | Dost         | top  | DER  | CCCXI / XXIX         | verzerte die krätze                                                  |
| <i>Origanum vulgare</i> aggr. | Lamiaceae  | ren   | LF   | Dost         | top  | DER  | CCCXI / XXIX         | denen mit rauden beladen sind                                        |
| <i>Origanum vulgare</i> aggr. | Lamiaceae  | ren   | LF   | Dost         | top  | DER  | CCCXI / XXIX         | geschwollenen Mandeln, dem zaeppfing und geschwaeren des munds       |
|                               |            |       |      |              |      |      |                      | vertreibt und verzert allerley geschwulst, verzert das undergrunnen  |
| <i>Origanum vulgare</i> aggr. | Lamiaceae  | ren   | LF   | Dost         | top  | DER  | CCCXI / XXIX         | blut                                                                 |
| <i>Origanum vulgare</i> aggr. | Lamiaceae  | ren   | LF   | Dost         | top  | EAR  | CCCXI / XXIX         | lindert den schmerzen der ohren                                      |
| <i>Origanum vulgare</i> aggr. | Lamiaceae  | ren   | LF   | Dost         | vol  | EAR  | CCCXI / XXIX         | zerteylet das sausen und klingen der ohren                           |
| <i>Origanum vulgare</i> aggr. | Lamiaceae  | ren   | LF   | Dost         | syst | GAS  | CCCXI / XXIX         | die geelsucht haben                                                  |
| <i>Origanum vulgare</i> aggr. | Lamiaceae  | ren   | LF   | Dost         | syst | GYN  | CCCXI / XXIX         | bring den frawen ir zeit                                             |
| <i>Origanum vulgare</i> aggr. | Lamiaceae  | ren   | LF   | Dost         | syst | GYN  | CCCXI / XXIX         | treibt die schwarzen gallen durch den stulgang                       |
| <i>Origanum vulgare</i> aggr. | Lamiaceae  | ren   | LF   | Dost         | top  | n.d. | CCCXI / XXIX         | stilt der den weetagen der seiten und das stechen                    |
| <i>Origanum vulgare</i> aggr. | Lamiaceae  | ren   | LF   | Dost         | syst | NER  | CCCXI / XXIX         | denen den krampff haben                                              |
| <i>Origanum vulgare</i> aggr. | Lamiaceae  | ren   | LF   | Dost         | syst | RES  | CCCXI / XXIX         | hützlich zu dem husten                                               |
| <i>Origanum vulgare</i> aggr. | Lamiaceae  | ren   | LF   | Dost         | top  | TEE  | CCCXI / XXIX         | weisse zaen                                                          |
| <i>Origanum vulgare</i> aggr. | Lamiaceae  | ren   | LF   | Dost         | syst | URO  | CCCXI / XXIX         | wassersüchtig                                                        |
| <i>Origanum vulgare</i> aggr. | Lamiaceae  | s pop | JK   | Dost         | syst | CAR  | p. 392               | verstärken Blutzirkulation                                           |
| <i>Origanum vulgare</i> aggr. | Lamiaceae  | s pop | JK   | Dost         | syst | GAS  | p. 392               | reinigen Magen                                                       |
| <i>Origanum vulgare</i> aggr. | Lamiaceae  | s pop | JK   | Dost         | syst | GYN  | p. 393               | Beschwerden der Unterleibsorgane, verstopfte Periode, Weissfluss     |
| <i>Origanum vulgare</i> aggr. | Lamiaceae  | s pop | JK   | Dost         | vol  | OTH  | p. 396               | guter Rauchtobak                                                     |
| <i>Origanum vulgare</i> aggr. | Lamiaceae  | s pop | JK   | Dost         | syst | RES  | p. 392               | reinigen Lungen                                                      |
| <i>Origanum vulgare</i> aggr. | Lamiaceae  | s pop | JK   | Dost         | top  | SKE  | p. 395               | rheumatische Schmerzen                                               |

|                                          |              |           |                     |      |      |                     |                                                                      |
|------------------------------------------|--------------|-----------|---------------------|------|------|---------------------|----------------------------------------------------------------------|
| <i>Oriqum vulgare</i> Gaert.             | Lamiaceae    | s pop JK  | Dost                | top  | TEE  | p. 394              | Schmerzen, die von hohlen Zähnen her kommen                          |
| <i>Oriqum vulgare</i> Gaert.             | Lamiaceae    | s pop JK  | Dost                | top  | TON  | p. 393              | Krautbäder, Gensende, schwache Frauen, serbelnde Kinder              |
| <i>Oriqum vulgare</i> Gaert.             | Lamiaceae    | s pop UB  | Dost                | syst | RES  | p. 225              | kramplindernde Heilpflanzen [bei Husten]                             |
| <i>Papaver somniferum</i> L.             | Papaveraceae | ant DIOS  | Schlafmohn          | top  | DER  | 228                 | bei Rose und Wunden                                                  |
| <i>Papaver somniferum</i> L.             | Papaveraceae | ant DIOS  | Schlafmohn          | top  | DER  | 228                 | Kataplasma ein gutes Mittel bei Geschwulsten und Rose                |
| <i>Papaver somniferum</i> L.             | Papaveraceae | ant DIOS  | Schlafmohn          | top  | EAR  | 228                 | Ohrschmerzen                                                         |
| <i>Papaver somniferum</i> L.             | Papaveraceae | ant DIOS  | Schlafmohn          | top  | EYE  | 228                 | Bei Augenentzündungen                                                |
| <i>Papaver somniferum</i> L.             | Papaveraceae | ant DIOS  | Schlafmohn          | syst | GAS  | 228                 | und die Verdauung befördernd und [hilft auch bei] Magenaffektionen   |
| <i>Papaver somniferum</i> L.             | Papaveraceae | ant DIOS  | Schlafmohn          | syst | GAS  | 228                 | Leckmittel, welches schmerzstillend wirkt bei [Husten, Fluss         |
| <i>Papaver somniferum</i> L.             | Papaveraceae | ant DIOS  | Schlafmohn          | syst | GAS  | 228                 | (Erkältung) der Luftröhre und] Magenaffektionen.                     |
| <i>Papaver somniferum</i> L.             | Papaveraceae | ant DIOS  | Schlafmohn          | syst | GYN  | 228                 | Bauchfluss                                                           |
| <i>Papaver somniferum</i> L.             | Papaveraceae | ant DIOS  | Schlafmohn          | syst | GYN  | 228                 | Fluss der Frauen                                                     |
| <i>Papaver somniferum</i> L.             | Papaveraceae | ant DIOS  | Schlafmohn          | syst | NER  | 228                 | schmerzstillend, schlafmachend; lindert aber auch Kopfschmerzen,     |
| <i>Papaver somniferum</i> L.             | Papaveraceae | ant DIOS  | Schlafmohn          | syst | NER  | 228                 | wenn er mit Rosenöl aufgesprengt                                     |
| <i>Papaver somniferum</i> L.             | Papaveraceae | ant DIOS  | Schlafmohn          | top  | NER  | 228                 | als Stuhlzapfen eingelegt macht er Schlaf                            |
| <i>Papaver somniferum</i> L.             | Papaveraceae | ant DIOS  | Schlafmohn          | syst | NER  | 228                 | auch gegen Schlaflosigkeit getrunken                                 |
| <i>Papaver somniferum</i> L.             | Papaveraceae | ant DIOS  | Schlafmohn          | vol  | NER  | 228                 | bewirken die in Wasser gekochten Blätter und Köpfe als Bähmittel     |
| <i>Papaver somniferum</i> L.             | Papaveraceae | ant DIOS  | Schlafmohn          | syst | NER  | 228                 | Schlaf                                                               |
| <i>Papaver somniferum</i> L.             | Papaveraceae | ant DIOS  | Schlafmohn          | syst | NER  | 228                 | bei den an Schlaflosigkeit Leidenden                                 |
| <i>Papaver somniferum</i> L.             | Papaveraceae | ant DIOS  | Schlafmohn          | syst | RES  | 228                 | hilft auch bei Husten                                                |
| <i>Papaver somniferum</i> L.             | Papaveraceae | ant DIOS  | Schlafmohn          | syst | RES  | 228                 | Leckmittel, welches schmerzstillend wirkt bei Husten, Fluss          |
| <i>Papaver somniferum</i> L.             | Papaveraceae | ant DIOS  | Schlafmohn          | syst | RES  | 228                 | (Erkältung) der Luftröhre [und Magenaffektionen].                    |
| <i>Papaver somniferum</i> L.             | Papaveraceae | ant DIOS  | Schlafmohn          | top  | SKE  | 228                 | bei Podagra                                                          |
| <i>Papaver somniferum</i> L.             | Papaveraceae | mon HVB   | Mohn                | syst | DER  | 1-96                | und verhindern den Juckreiz, [und sie unterdrücken die rasenden      |
| <i>Papaver somniferum</i> L.             | Papaveraceae | mon HVB   | Mohn                | syst | NER  | 1-96                | Läuse und Nisse]                                                     |
| <i>Papaver somniferum</i> L.             | Papaveraceae | mon HVB   | Mohn                | syst | OTH  | 1-96                | seine Körner führen den Schlaf herbei                                |
| <i>Papaver somniferum</i> L.             | Papaveraceae | mon MF    | Schwarzer Mohn      | top  | DER  | 32                  | und sie unterdrücken die rasenden Läuse und Nisse                    |
| <i>Papaver somniferum</i> L.             | Papaveraceae | mon MF    | Weisser Mohn        | top  | EAR  | 32                  | Antoniusfeuer löschen                                                |
| <i>Papaver somniferum</i> L.             | Papaveraceae | mon MF    | Weisser Mohn        | syst | GAS  | 32                  | träufelt in die Ohren                                                |
| <i>Papaver somniferum</i> L.             | Papaveraceae | mon MF    | Schwarzer Mohn      | syst | GAS  | 32                  | schützt Magen und Leib vor Unregelmässigkeiten                       |
| <i>Papaver somniferum</i> L.             | Papaveraceae | mon MF    | Schwarzer Mohn      | syst | GYN  | 32                  | Durchfall hemmen                                                     |
| <i>Papaver somniferum</i> L.             | Papaveraceae | mon MF    | Schwarzer Mohn      | syst | GYN  | 32                  | Monatsfluss hemmen                                                   |
| <i>Papaver somniferum</i> L.             | Papaveraceae | mon MF    | Weisser Mohn        | syst | NER  | 32                  | bringt Schlummer                                                     |
| <i>Papaver somniferum</i> L.             | Papaveraceae | mon MF    | Weisser Mohn        | top  | NER  | 32                  | behebt zu allen Schmerz, bereitet die Ruhe und Schlummer             |
| <i>Papaver somniferum</i> L.             | Papaveraceae | mon MF    | Weisser Mohn        | top  | NER  | 32                  | bringt Schlummer                                                     |
| <i>Papaver somniferum</i> L.             | Papaveraceae | mon MF    | Weisser Mohn        | vol  | NER  | 32                  | After auftragen oder als Zapfen verwendet, pflegt sie die Schlaf     |
| <i>Papaver somniferum</i> L.             | Papaveraceae | mon MF    | Schwarzer Mohn      | syst | NER  | 32                  | herbei zu führen, allein ihrem Duft zu verdanken sein                |
| <i>Papaver somniferum</i> L.             | Papaveraceae | mon MF    | Schwarzer Mohn      | syst | NER  | 32                  | führt als Trunk den Schlaf herbei                                    |
| <i>Papaver somniferum</i> L.             | Papaveraceae | mon MF    | Schwarzer Mohn      | top  | RES  | 32                  | geschwollener Schlund heilen, Stimmänder                             |
| <i>Papaver somniferum</i> L.             | Papaveraceae | mon MF    | Weisser Mohn        | syst | RES  | 32                  | rauh geworden                                                        |
| <i>Papaver somniferum</i> L.             | Papaveraceae | mon MF    | Schwarzer Mohn      | syst | RES  | 32                  | vertreibt Husten, trocknet bösen Saftfluss zu den Stimmändern        |
| <i>Papaver somniferum</i> L.             | Papaveraceae | mon MF    | Weisser Mohn        | syst | RES  | 32                  | aus                                                                  |
| <i>Papaver somniferum</i> L.             | Papaveraceae | mon MF    | Schwarzer Mohn      | syst | RES  | 32                  | zähmt den bösen Husten;                                              |
| <i>Papaver somniferum</i> L.             | Papaveraceae | mon MF    | Weisser Mohn        | top  | SKE  | 32                  | Fussgicht zu Milde zwingen                                           |
| <i>Papaver somniferum</i> L.             | Papaveraceae | ren LF    | Meisterwurz         | n.d. | ANT  | CCCXXVII / CCXCII   | zu der zeit der pestilenz wider den vergifteten bösen luft gebraucht |
| <i>Papaver somniferum</i> L.             | Papaveraceae | ren LF    | Schlafmohn          | top  | DER  | CCXCIII / CCXVI     | werden                                                               |
| <i>Papaver somniferum</i> L.             | Papaveraceae | ren LF    | Schlafmohn          | top  | EAR  | CCXCIII / CCXVI     | gut zum rotlauff in dergleichen hitzigen gebresten                   |
| <i>Papaver somniferum</i> L.             | Papaveraceae | ren LF    | Schlafmohn          | top  | EYE  | CCXCIII / CCXVI     | benimmt er den schmerzen derselben [ohren]                           |
| <i>Papaver somniferum</i> L.             | Papaveraceae | ren LF    | Schlafmohn          | syst | GAS  | CCXCIII / CCXVI     | gut zu den hitzigen Augen                                            |
| <i>Papaver somniferum</i> L.             | Papaveraceae | ren LF    | Schlafmohn          | syst | GYN  | CCXCIII / CCXVI     | zu dem bauchfluss                                                    |
| <i>Papaver somniferum</i> L.             | Papaveraceae | ren LF    | Schlafmohn          | syst | GYN  | CCXCIII / CCXVI     | und den frauen so zuvil fliessen                                     |
| <i>Papaver somniferum</i> L.             | Papaveraceae | ren LF    | Schlafmohn          | syst | NER  | CCXCIII / CCXVI     | vertreibt das vil wachen                                             |
| <i>Papaver somniferum</i> L.             | Papaveraceae | ren LF    | Schlafmohn          | top  | NER  | CCXCIII / CCXVI     | bringt den schlaff                                                   |
| <i>Papaver somniferum</i> L.             | Papaveraceae | ren LF    | Schlafmohn          | top  | NER  | CCXCIII / CCXVI     | windt den schlaf                                                     |
| <i>Papaver somniferum</i> L.             | Papaveraceae | ren LF    | Schlafmohn          | top  | NER  | CCXCIII / CCXVI     | stilt er den westagen des laups                                      |
| <i>Papaver somniferum</i> L.             | Papaveraceae | ren LF    | Schlafmohn          | top  | NER  | CCXCIII / CCXVI     | an die hirn um schlaffen gestrichen vertribt das vil wachen          |
| <i>Papaver somniferum</i> L.             | Papaveraceae | ren LF    | Schlafmohn          | syst | RES  | CCXCIII / CCXVI     | seer nütz zu dem husten                                              |
| <i>Papaver somniferum</i> L.             | Papaveraceae | ren LF    | Schlafmohn          | top  | SKE  | CCXCIII / CCXVI     | denen so das podagram haben                                          |
| <i>Papaver somniferum</i> L.             | Papaveraceae | s pop VAL | Weisser Mohn        | syst | GAS  | p. 406              | diarrhees, dysenterie                                                |
| <i>Papaver somniferum</i> L.             | Papaveraceae | s pop VAL | Weisser Mohn        | syst | NER  | p. 406              | toutes les douleurs, anxiété, insomnies                              |
| <i>Papaver somniferum</i> L.             | Papaveraceae | s pop VAL | Weisser Mohn        | syst | RES  | p. 406              | hémoptysis, affection pulmonaire                                     |
| <i>Petasites hybridus</i> (L.) Gaertn.   | Asteraceae   | ant DIOS  | Pestwurz            | top  | DER  | 240                 | es wirkt, fein gestossen, als Umschlag gegen bösartige und           |
| <i>Petasites hybridus</i> (L.) Gaertn.   | Asteraceae   | mon HVB   | Grossblättriger Huf | top  | DER  | 1-210               | krebisge Geschwüre                                                   |
| <i>Petasites hybridus</i> (L.) Gaertn.   | Asteraceae   | ren LF    | Pestwurz            | top  | DER  | CCCLXVII / CCXLVIII | Skröfeln                                                             |
| <i>Petasites hybridus</i> (L.) Gaertn.   | Asteraceae   | ren LF    | Pestwurz            | syst | DER  | CCCLXVII / CCXLVIII | in die bösen umbressenden wunden und geschwaer gethon                |
| <i>Petasites hybridus</i> (L.) Gaertn.   | Asteraceae   | ren LF    | Pestwurz            | syst | DER  | CCCLXVII / CCXLVIII | heylet die seer feuchten wunden und andere unreynigkety der haut     |
| <i>Petasites hybridus</i> (L.) Gaertn.   | Asteraceae   | ren LF    | Pestwurz            | syst | FEV  | CCCLXVII / CCXLVIII | wider die giftigen und pestilenzischen fieber                        |
| <i>Petasites hybridus</i> (L.) Gaertn.   | Asteraceae   | ren LF    | Pestwurz            | syst | GAS  | CCCLXVII / CCXLVIII | toedt die wurm im leib                                               |
| <i>Petasites hybridus</i> (L.) Gaertn.   | Asteraceae   | ren LF    | Pestwurz            | syst | GYN  | CCCLXVII / CCXLVIII | wider das grimmen und aufsteigen der muter                           |
| <i>Petasites hybridus</i> (L.) Gaertn.   | Asteraceae   | ren LF    | Pestwurz            | syst | GYN  | CCCLXVII / CCXLVIII | bringt den frauen ir zeit                                            |
| <i>Petasites hybridus</i> (L.) Gaertn.   | Asteraceae   | ren LF    | Pestwurz            | syst | HUM  | CCCLXVII / CCXLVIII | treibt den schweyss mit gewalt aus                                   |
| <i>Petasites hybridus</i> (L.) Gaertn.   | Asteraceae   | ren LF    | Pestwurz            | syst | RES  | CCCLXVII / CCXLVIII | gut und nützlich denen so schwerich athmen                           |
| <i>Petasites hybridus</i> (L.) Gaertn.   | Asteraceae   | ren LF    | Pestwurz            | syst | URO  | CCCLXVII / CCXLVIII | treibt den harn und bringe den frauen ir zeit                        |
| <i>Petasites hybridus</i> (L.) Gaertn.   | Asteraceae   | s pop BVA | Pestwurz            | top  | DER  | p. 161              | Krampladen                                                           |
| <i>Petasites hybridus</i> (L.) Gaertn.   | Asteraceae   | s pop BVA | Pestwurz            | syst | GAS  | p. 161              | Magenkrampfen                                                        |
| <i>Petasites hybridus</i> (L.) Gaertn.   | Asteraceae   | s pop BVA | Pestwurz            | syst | GAS  | p. 161              | Magenkrampfen                                                        |
| <i>Petasites hybridus</i> (L.) Gaertn.   | Asteraceae   | s pop BVA | Pestwurz            | syst | NER  | p. 161              | Krämpfen                                                             |
| <i>Petasites hybridus</i> (L.) Gaertn.   | Asteraceae   | s pop BVA | Pestwurz            | syst | NER  | p. 161              | Krämpfen                                                             |
| <i>Petasites hybridus</i> (L.) Gaertn.   | Asteraceae   | s pop BVA | Pestwurz            | syst | NER  | p. 161              | Nervenschwache, nervösen Magen                                       |
| <i>Petasites hybridus</i> (L.) Gaertn.   | Asteraceae   | s pop BVA | Pestwurz            | syst | NER  | p. 161              | Nervenschwache, nervösen Magen                                       |
| <i>Petasites hybridus</i> (L.) Gaertn.   | Asteraceae   | s pop BVA | Pestwurz            | syst | RES  | p. 161              | Husten, Bronchitis                                                   |
| <i>Petasites hybridus</i> (L.) Gaertn.   | Asteraceae   | s pop BVA | Pestwurz            | syst | RES  | p. 161              | Husten, Bronchitis                                                   |
| <i>Petasites hybridus</i> (L.) Gaertn.   | Asteraceae   | s pop BVA | Pestwurz            | top  | SKE  | p. 161              | Gelenkschmerzen                                                      |
| <i>Petasites hybridus</i> (L.) Gaertn.   | Asteraceae   | s pop JK  | Pestwurz            | top  | DER  | p. 402              | Kühlmittel für Brandwunden, offene Wunden, Gichtknoten, Bienen-      |
| <i>Petasites hybridus</i> (L.) Gaertn.   | Asteraceae   | s pop JK  | Pestwurz            | syst | HUM  | p. 402              | und Wespenstiche                                                     |
| <i>Petasites hybridus</i> (L.) Gaertn.   | Asteraceae   | s pop JK  | Pestwurz            | syst | HUM  | p. 402              | stark schweisstreibend                                               |
| <i>Petasites hybridus</i> (L.) Gaertn.   | Asteraceae   | s pop JK  | Pestwurz            | syst | TON  | p. 402              | Vorbeugungsmittel gegen Diphtherie, Grippe und andere                |
| <i>Petasites hybridus</i> (L.) Gaertn.   | Asteraceae   | s pop MT  | Hirtentäschel       | top  | DER  | p. 23               | suchenartig ansteckende Krankheiten                                  |
| <i>Petasites hybridus</i> (L.) Gaertn.   | Asteraceae   | s pop MT  | Hirtentäschel       | syst | FEV  | p. 23               | Brand, bösartigen Geschwüren und brennenden Wunden                   |
| <i>Petasites hybridus</i> (L.) Gaertn.   | Asteraceae   | s pop MT  | Hirtentäschel       | syst | HUM  | p. 23               | Fieber                                                               |
| <i>Petasites hybridus</i> (L.) Gaertn.   | Asteraceae   | s pop MT  | Hirtentäschel       | top  | SKE  | p. 23               | schweisstreibend (Fieber, Atemnot, Gicht, Fallsucht)                 |
| <i>Petasites hybridus</i> (L.) Gaertn.   | Asteraceae   | s pop UB  | Pestwurz            | syst | NER  | p. 23               | Verstauchungen, Verrenkungen, wundgelaufene Füße                     |
| <i>Petasites hybridus</i> (L.) Gaertn.   | Asteraceae   | s pop UB  | Pestwurz            | syst | URO  | p. 441              | Migräne                                                              |
| <i>Petasites hybridus</i> (L.) Gaertn.   | Asteraceae   | s pop BVA | Pestwurz            | syst | URO  | p. 259              | Nieren- und Harnleitersteine                                         |
| <i>Petasites hybridus</i> (L.) Gaertn.   | Asteraceae   | sci WI    | Pestwurz            | syst | GAS  | p. 429              | Magen-Darm-Bereich                                                   |
| <i>Petasites hybridus</i> (L.) Gaertn.   | Asteraceae   | sci WI    | Pestwurz            | syst | RES  | p. 429              | Astmah                                                               |
| <i>Petasites hybridus</i> (L.) Gaertn.   | Asteraceae   | sci WI    | Pestwurz            | syst | URO  | p. 429              | ableitenden Harnwege                                                 |
| <i>Petroselinum crispum</i> (Mill.) Fuss | Apiaceae     | ant DIOS  | Petersilie          | syst | GAS  | 187                 | auch ein gutes Mittel gegen Aufblähen des Magens und Kolons und      |
| <i>Petroselinum crispum</i> (Mill.) Fuss | Apiaceae     | ant DIOS  | Petersilie          | syst | GYN  | 187                 | gegen Leibschnitten                                                  |
| <i>Petroselinum crispum</i> (Mill.) Fuss | Apiaceae     | ant DIOS  | Petersilie          | syst | URO  | 187                 | welcher [den Harn und] die Menstruation befördert                    |
| <i>Petroselinum crispum</i> (Mill.) Fuss | Apiaceae     | ant DIOS  | Petersilie          | syst | URO  | 187                 | welcher den Harn [und die Menstruation] befördert                    |
| <i>Petroselinum crispum</i> (Mill.) Fuss | Apiaceae     | mon HVB   | Petersilie          | syst | FEV  | 1-68                | ebenso gegen Seiten-, Nieren- und Blasenschmerzen                    |
| <i>Petroselinum crispum</i> (Mill.) Fuss | Apiaceae     | mon HVB   | Petersilie          | syst | GAS  | 1-68                | mildert Fiber, die Menschen nicht erschüttern, nur berühren          |
| <i>Petroselinum crispum</i> (Mill.) Fuss | Apiaceae     | mon HVB   | Petersilie          | syst | n.d. | 1-68                | kranker Magen                                                        |
| <i>Petroselinum crispum</i> (Mill.) Fuss | Apiaceae     | mon HVB   | Petersilie          | top  | SKE  | 1-68                | Schmerzen im Herz, in der Milz oder in der Seite                     |
| <i>Petroselinum crispum</i> (Mill.) Fuss | Apiaceae     | mon HVB   | Petersilie          | top  | SKE  | 1-68                | Lähmung                                                              |
| <i>Petroselinum crispum</i> (Mill.) Fuss | Apiaceae     | mon HVB   | Petersilie          | syst | URO  | 1-68                | am Stein leidet                                                      |
| <i>Petroselinum crispum</i> (Mill.) Fuss | Apiaceae     | mon HVB   | Petersilie          | top  | URO  | 1-68                | am Stein leidet                                                      |
| <i>Petroselinum crispum</i> (Mill.) Fuss | Apiaceae     | ren LF    | Petersilie          | syst | ANT  | CCCXXVI / CCXVII    | braucht sie auch zu den arzneyn so für das gift gemacht              |
| <i>Petroselinum crispum</i> (Mill.) Fuss | Apiaceae     | ren LF    | Petersilie          | top  | EYE  | CCCXXVI / CCXVII    | ist er gut zu den hitzigen augen [aus Kapitel Epiph]                 |
| <i>Petroselinum crispum</i> (Mill.) Fuss | Apiaceae     | ren LF    | Petersilie          | syst | GAS  | CCCXXVI / CCXVII    | verhindert die aufblähung des magens, furdern die dewung,            |
| <i>Petroselinum crispum</i> (Mill.) Fuss | Apiaceae     | ren LF    | Petersilie          | syst | GAS  | CCCXXVI / CCXVII    | eröffnen das milz und die leber                                      |



|                                          |              |          |                   |          |                                                                                                                                         |
|------------------------------------------|--------------|----------|-------------------|----------|-----------------------------------------------------------------------------------------------------------------------------------------|
|                                          |              |          |                   |          | verzert auch die knollen in den brüsten der frauen [aus Kapitel                                                                         |
| <i>Petroselinum crispum</i> (Mill.) Fuss | Apiaceae     | ren LF   | Petersilie        | top GYN  | CCXXXVI / CCXXVII. Epöchl]                                                                                                              |
| <i>Petroselinum crispum</i> (Mill.) Fuss | Apiaceae     | ren LF   | Petersilie        | syst GYN | CCXXXVI / CCXXVII. bringen den frauen ir zeit                                                                                           |
| <i>Petroselinum crispum</i> (Mill.) Fuss | Apiaceae     | ren LF   | Petersilie        | syst URO | CCXXXVI / CCXXVII. treiben den harn                                                                                                     |
| <i>Petroselinum crispum</i> (Mill.) Fuss | Apiaceae     | s pop JK | Petersilie        | syst CAR | p. 402 Herz-, Milz- und Seitenstechen                                                                                                   |
| <i>Petroselinum crispum</i> (Mill.) Fuss | Apiaceae     | s pop JK | Petersilie        | syst GAS | p. 402 Leberleiden und Gelbsucht                                                                                                        |
| <i>Petroselinum crispum</i> (Mill.) Fuss | Apiaceae     | s pop JK | Petersilie        | syst URO | p. 402 Wassersucht, Steinleiden, Blasenleiden                                                                                           |
| <i>Petroselinum crispum</i> (Mill.) Fuss | Apiaceae     | s pop JK | Petersilie        | syst URO | p. 402 Blutpissen, schmerzhaftem urinieren, Prostataentzündung                                                                          |
| <i>Petroselinum crispum</i> (Mill.) Fuss | Apiaceae     | s pop UB | Petersilie        | syst URO | p. 256 Durchspülung                                                                                                                     |
| <i>Petroselinum crispum</i> (Mill.) Fuss | Apiaceae     | s pop UB | Petersilie        | syst URO | p. 256 Durchspülung                                                                                                                     |
| <i>Petroselinum crispum</i> (Mill.) Fuss | Apiaceae     | s pop WI | Petersilie        | syst GAS | p. 433 Volksmedizin: Stomachikum                                                                                                        |
| <i>Petroselinum crispum</i> (Mill.) Fuss | Apiaceae     | s pop WI | Petersilie        | syst GYN | p. 433 Volksmedizin: Dysmenorrhoe, Menstruationsbeschwerden / Emenagogum, Galaktagogum                                                  |
| <i>Petroselinum crispum</i> (Mill.) Fuss | Apiaceae     | s pop WI | Petersilie        | syst GYN | p. 433 Volksmedizin: Dysmenorrhoe, Menstruationsbeschwerden / Emenagogum, Galaktagogum                                                  |
| <i>Petroselinum crispum</i> (Mill.) Fuss | Apiaceae     | s pop WI | Petersilie        | top OTH  | p. 433 Volksmedizin: Kopfläuse                                                                                                          |
| <i>Petroselinum crispum</i> (Mill.) Fuss | Apiaceae     | sci WI   | Petersilie        | syst GAS | p. 433 Stomachikum                                                                                                                      |
| <i>Petroselinum crispum</i> (Mill.) Fuss | Apiaceae     | sci WI   | Petersilie        | top OTH  | p. 433 Kopfläuse                                                                                                                        |
| <i>Petroselinum crispum</i> (Mill.) Fuss | Apiaceae     | sci WI   | Petersilie        | syst URO | p. 433 kräftiges Diuretikum                                                                                                             |
| <i>Petroselinum crispum</i> (Mill.) Fuss | Apiaceae     | sci WI   | Petersilie        | syst URO | p. 433 Diuretikum                                                                                                                       |
| <i>Peucedanum</i> sp.                    | Apiaceae     | ant DIOS | Haarstrang        | top DER  | reinigt sie schmutzige Geschwüre, zieht Knochensplitter aus                                                                             |
| <i>Peucedanum</i> sp.                    | Apiaceae     | ant DIOS | Haarstrang        | top EAR  | p. 190 undbringt alte Wunden zur Vernarbung.                                                                                            |
| <i>Peucedanum</i> sp.                    | Apiaceae     | ant DIOS | Haarstrang        | syst GYN | p. 190 eingetropfelt bei Ohrenleiden                                                                                                    |
| <i>Peucedanum</i> sp.                    | Apiaceae     | ant DIOS | Haarstrang        | syst GYN | p. 190 hilft vorzüglich bei schweren Geburten.                                                                                          |
| <i>Peucedanum</i> sp.                    | Apiaceae     | ant DIOS | Haarstrang        | top NER  | p. 190 gutes Mittel bei Lethargie, Hirnkrankheit, Schwindel, Epilepsie, chronischem Kopfschmerz, Paralyse, Ischias, überhaupt bei allen |
| <i>Peucedanum</i> sp.                    | Apiaceae     | ant DIOS | Haarstrang        | syst OTH | p. 190 Nervenleiden, wenn er mit Öl und Essig eingeschiert wird                                                                         |
| <i>Peucedanum</i> sp.                    | Apiaceae     | ant DIOS | Haarstrang        | syst RES | p. 190 verkleinert die Milz                                                                                                             |
| <i>Peucedanum</i> sp.                    | Apiaceae     | ant DIOS | Haarstrang        | syst RES | p. 190 bei Husten, ebenso bei Athemnoth                                                                                                 |
| <i>Peucedanum</i> sp.                    | Apiaceae     | ant DIOS | Haarstrang        | syst RES | p. 190 Leibschnitten und Blähungszuständen                                                                                              |
| <i>Peucedanum</i> sp.                    | Apiaceae     | ant DIOS | Haarstrang        | top TEE  | p. 190 in den angefressenen Zahn gesteckt bei Zahnschmerzen                                                                             |
| <i>Peucedanum</i> sp.                    | Apiaceae     | ant DIOS | Haarstrang        | syst URO | p. 190 ein gutes Mittel gegen Schmerzen und Spannung der Blase und der Nieren                                                           |
| <i>Peucedanum</i> sp.                    | Apiaceae     | mon HvB  | Meisterwurz       | syst FEV | 1-167 Denn wer Fieber hat, welcher Art es auch sei                                                                                      |
| <i>Peucedanum</i> sp.                    | Apiaceae     | mon HvB  | Meisterwurz       | syst GAS | 1-167 Wer aber die gegessene Speise nicht verdauen kann                                                                                 |
| <i>Peucedanum</i> sp.                    | Apiaceae     | mon MF   | Meisterwurz       | top DER  | 26 heilt jedwedes Blatterbläschen                                                                                                       |
| <i>Peucedanum</i> sp.                    | Apiaceae     | mon MF   | Meisterwurz       | top DER  | 26 reinigt den Aussatz                                                                                                                  |
| <i>Peucedanum</i> sp.                    | Apiaceae     | mon MF   | Meisterwurz       | syst GAS | 26 vertreibt alle Leiden der Leber, hilft Gelbsüchtigen                                                                                 |
| <i>Peucedanum</i> sp.                    | Apiaceae     | mon MF   | Meisterwurz       | top GAS  | 26 hilft den Gelbsüchtigen, wenn sie ihn in die Nase saugen, gemischt mit Weibermilch                                                   |
| <i>Peucedanum</i> sp.                    | Apiaceae     | mon MF   | Meisterwurz       | syst GYN | 26 bringt Monatsregel in Gang                                                                                                           |
| <i>Peucedanum</i> sp.                    | Apiaceae     | mon MF   | Meisterwurz       | top GYN  | 26 soll die Leibesfrucht abtreiben und reichlich Monatsfluss hervorrufen                                                                |
| <i>Peucedanum</i> sp.                    | Apiaceae     | mon MF   | Meisterwurz       | syst RES | 26 lindert Husten, hilft auch bei Atemnot                                                                                               |
| <i>Peucedanum</i> sp.                    | Apiaceae     | mon MF   | Meisterwurz       | vol RES  | 26 Niesmittel, wenn die Säfte vom Haupt herunter fließen                                                                                |
| <i>Peucedanum</i> sp.                    | Apiaceae     | mon MF   | Meisterwurz       | syst URO | 26 soll Blasensteine brechen, bringt Harnfluss in Gang                                                                                  |
| <i>Peucedanum</i> sp.                    | Apiaceae     | ren LF   | Meisterwurz       | top ANT  | CCXXXVII / CCXCII. gut wider allerley stich und biss der giftigen thier                                                                 |
| <i>Peucedanum</i> sp.                    | Apiaceae     | ren LF   | Meisterwurz       | top ANT  | CCXXXVII / CCXCII. heylet er die wunden son von einem wuetenden hund oder nattern                                                       |
| <i>Peucedanum</i> sp.                    | Apiaceae     | ren LF   | Meisterwurz       | top ANT  | CCXXXVII / CCXCII. gebissen sind                                                                                                        |
| <i>Peucedanum</i> sp.                    | Apiaceae     | ren LF   | Meisterwurz       | n.d. ANT | CCXXXVII / CCXCII. sind trefflich nütz und gut wider allerley gift.                                                                     |
| <i>Peucedanum</i> sp.                    | Apiaceae     | ren LF   | Meisterwurz       | vol DER  | CCXXXVII / CCXCII. wartzten so am hindern gewachsen sind                                                                                |
| <i>Peucedanum</i> sp.                    | Apiaceae     | ren LF   | Meisterwurz       | top DER  | CCXXXVII / CCXCII. heylet er die recht                                                                                                  |
| <i>Peucedanum</i> sp.                    | Apiaceae     | ren LF   | Meisterwurz       | top DER  | CCXXXVII / CCXCII. heylet die knollen                                                                                                   |
| <i>Peucedanum</i> sp.                    | Apiaceae     | ren LF   | Meisterwurz       | syst GAS | CCXXXVII / CCXCII. zerzet die knollen mit und das zusammen gerunnen blut                                                                |
| <i>Peucedanum</i> sp.                    | Apiaceae     | ren LF   | Meisterwurz       | syst GAS | CCXXXVII / CCXCII. stark er den magen macht lust zu essen                                                                               |
| <i>Peucedanum</i> sp.                    | Apiaceae     | ren LF   | Meisterwurz       | syst GAS | CCXXXVII / CCXCII. treibt den harn                                                                                                      |
| <i>Peucedanum</i> sp.                    | Apiaceae     | ren LF   | Meisterwurz       | syst GAS | CCXXXVII / CCXCII. adersucht                                                                                                            |
| <i>Peucedanum</i> sp.                    | Apiaceae     | ren LF   | Meisterwurz       | syst GAS | CCXXXVII / CCXCII. wassersuchtig sind                                                                                                   |
| <i>Peucedanum</i> sp.                    | Apiaceae     | ren LF   | Meisterwurz       | syst GYN | CCXXXVII / CCXCII. reynnigt auch die muter und treibt aus die todte frucht                                                              |
| <i>Peucedanum</i> sp.                    | Apiaceae     | ren LF   | Meisterwurz       | syst GYN | CCXXXVII / CCXCII. bringt den frauen ir zeit                                                                                            |
| <i>Peucedanum</i> sp.                    | Apiaceae     | ren LF   | Meisterwurz       | syst NER | CCXXXVII / CCXCII. ist gut zu dem krampff und dergleichen kalten gebresten der nerven                                                   |
| <i>Peucedanum</i> sp.                    | Apiaceae     | ren LF   | Meisterwurz       | syst OTH | CCXXXVII / CCXCII. heylet die innerlichen wunden                                                                                        |
| <i>Peucedanum</i> sp.                    | Apiaceae     | ren LF   | Meisterwurz       | n.d. RES | CCXXXVII / CCXCII. gut zu dem husten der von kelte kompt                                                                                |
| <i>Peucedanum</i> sp.                    | Apiaceae     | ren LF   | Meisterwurz       | syst RES | CCXXXVII / CCXCII. gebresten der brust                                                                                                  |
| <i>Peucedanum</i> sp.                    | Apiaceae     | ren LF   | Meisterwurz       | top SKE  | CCXXXVII / CCXCII. gut zu dem hüftwe                                                                                                    |
| <i>Peucedanum</i> sp.                    | Apiaceae     | ren LF   | Meisterwurz       | top SKE  | CCXXXVII / CCXCII. podagra                                                                                                              |
| <i>Peucedanum</i> sp.                    | Apiaceae     | ren LF   | Meisterwurz       | syst TON | CCXXXVII / CCXCII. gut zu bewegung des schweyss, hilft dem erstorben kalten mann                                                        |
| <i>Peucedanum</i> sp.                    | Apiaceae     | ren LF   | Meisterwurz       | syst TON | CCXXXVII / CCXCII. wider auff                                                                                                           |
| <i>Peucedanum</i> sp.                    | Apiaceae     | ren LF   | Meisterwurz       | syst TON | CCXXXVII / CCXCII. überkompt der ganze leib ein gute farb                                                                               |
| <i>Peucedanum</i> sp.                    | Apiaceae     | s pop JK | Meisterwurz       | syst ANT | p. 396 inneren Vergiftungen                                                                                                             |
| <i>Peucedanum</i> sp.                    | Apiaceae     | s pop JK | Meisterwurz       | syst ANT | p. 396 inneren Vergiftungen                                                                                                             |
| <i>Peucedanum</i> sp.                    | Apiaceae     | s pop JK | Meisterwurz       | syst ANT | p. 396 Blutvergiftungen                                                                                                                 |
| <i>Peucedanum</i> sp.                    | Apiaceae     | s pop JK | Meisterwurz       | top DER  | p. 396 Blutvergiftungen durch rostige Nägel, infizierte Wunden, Aissen und Furunkeln                                                    |
| <i>Peucedanum</i> sp.                    | Apiaceae     | s pop JK | Meisterwurz       | syst GAS | p. 396 Durchfall                                                                                                                        |
| <i>Peucedanum</i> sp.                    | Apiaceae     | s pop JK | Meisterwurz       | syst NER | p. 396 vom Schlag getroffen, das Fallend Weh                                                                                            |
| <i>Peucedanum</i> sp.                    | Apiaceae     | s pop JK | Meisterwurz       | syst OTH | p. 396 inneren Blutungen                                                                                                                |
| <i>Peucedanum</i> sp.                    | Apiaceae     | s pop JK | Meisterwurz       | vol RES  | p. 397 Schnupfen                                                                                                                        |
| <i>Peucedanum</i> sp.                    | Apiaceae     | s pop JK | Meisterwurz       | top SKE  | p. 396 schmerzhaftes Gichtknoten                                                                                                        |
| <i>Peucedanum</i> sp.                    | Apiaceae     | s pop JK | Meisterwurz       | top TEE  | p. 396 Zahnweh                                                                                                                          |
| <i>Peucedanum</i> sp.                    | Apiaceae     | s pop JK | Meisterwurz       | syst TON | p. 396 ansteckende Krankheiten drohen, wie Grippe, Typhus, Cholera                                                                      |
| <i>Peucedanum</i> sp.                    | Apiaceae     | s pop JK | Meisterwurz       | syst URO | p. 396 Nierensteinen                                                                                                                    |
| <i>Pimpinella saxifraga</i> agg.         | Apiaceae     | ant DIOS | Bibernelle        | syst URO | 150 Es ist harntreibend                                                                                                                 |
| <i>Pimpinella saxifraga</i> agg.         | Apiaceae     | mon HvB  | Bibiernell        | top APO  | 1-131 magischen Worten und von Zauber getauscht werden                                                                                  |
| <i>Pimpinella saxifraga</i> agg.         | Apiaceae     | ren LF   | Kleine Bibernelle | syst ANT | CCXLVI / CCXXXII. gebissen sind                                                                                                         |
| <i>Pimpinella saxifraga</i> agg.         | Apiaceae     | ren LF   | Kleine Bibernelle | syst APO | CCXLVI / CCXXXII. gut zu der zeit der pestilenz gebraucht                                                                               |
| <i>Pimpinella saxifraga</i> agg.         | Apiaceae     | ren LF   | Kleine Bibernelle | top DER  | CCXLVI / CCXXXII. vertreibt die maeler und flecken desseligen [Anagisicht]                                                              |
| <i>Pimpinella saxifraga</i> agg.         | Apiaceae     | ren LF   | Kleine Bibernelle | top DER  | CCXLVI / CCXXXII. renvet er dieselbigen [unreyn wunden]                                                                                 |
| <i>Pimpinella saxifraga</i> agg.         | Apiaceae     | ren LF   | Kleine Bibernelle | top EYE  | CCXLVI / CCXXXII. macht ein klar gesicht                                                                                                |
| <i>Pimpinella saxifraga</i> agg.         | Apiaceae     | ren LF   | Kleine Bibernelle | syst URO | CCXLVI / CCXXXII. bricht den stein der blasen und treibt den harn                                                                       |
| <i>Pimpinella saxifraga</i> agg.         | Apiaceae     | s pop JK | Bibernelle        | top DER  | p. 334 eiternde Wunden und wildes Fleisch                                                                                               |
| <i>Pimpinella saxifraga</i> agg.         | Apiaceae     | s pop JK | Bibernelle        | top DER  | p. 334 Halsleiden                                                                                                                       |
| <i>Pimpinella saxifraga</i> agg.         | Apiaceae     | s pop JK | Bibernelle        | syst GAS | p. 334 Magen und Gedarmen                                                                                                               |
| <i>Pimpinella saxifraga</i> agg.         | Apiaceae     | s pop JK | Bibernelle        | syst RES | p. 334 Heiserkeit, Lungenkatarrh                                                                                                        |
| <i>Pimpinella saxifraga</i> agg.         | Apiaceae     | s pop JK | Bibernelle        | syst RES | p. 334 Brust- du Lundenverschleimung, Lungenentzündung                                                                                  |
| <i>Pimpinella saxifraga</i> agg.         | Apiaceae     | s pop JK | Bibernelle        | n.d. TON | p. 334 Vorbeugungsmittel gegen ansteckende Krankheiten                                                                                  |
| <i>Pimpinella saxifraga</i> agg.         | Apiaceae     | s pop UB | Bibernelle        | syst RES | p. 220 Auswurförderung                                                                                                                  |
| <i>Pimpinella saxifraga</i> agg.         | Apiaceae     | s pop UB | Bibernelle        | syst RES | p. 220 Auswurförderung                                                                                                                  |
| <i>Pimpinella saxifraga</i> agg.         | Apiaceae     | s pop WI | Bibernelle        | syst GAS | p. 441 Volksheilkunde: Stomachikum                                                                                                      |
| <i>Pimpinella saxifraga</i> agg.         | Apiaceae     | s pop WI | Bibernelle        | syst URO | p. 441 Volksheilkunde: Diuretikum                                                                                                       |
| <i>Pimpinella saxifraga</i> agg.         | Apiaceae     | sci WI   | Bibernelle        | top DER  | p. 441 entzündliche Erkrankungen der Mund- und Rachenhöhle                                                                              |
| <i>Pimpinella saxifraga</i> agg.         | Apiaceae     | sci WI   | Bibernelle        | syst RES | p. 441 hustenlinderndes Mittel                                                                                                          |
| <i>Polygonum aviculare</i> agg.          | Polygonaceae | ant DIOS | Vogelknöterich    | syst ANT | 214 hilft er gegen den Biss giftiger Thiere                                                                                             |
| <i>Polygonum aviculare</i> agg.          | Polygonaceae | ant DIOS | Vogelknöterich    | syst DER | 214 Geschwüren an den Schamtheilen                                                                                                      |
| <i>Polygonum aviculare</i> agg.          | Polygonaceae | ant DIOS | Vogelknöterich    | top DER  | 214 bei kriechenden Geschwüren, roseartigen Entzündungen und Geschwulsten, ebenso bei Oedemen und frischen Wunden                       |
| <i>Polygonum aviculare</i> agg.          | Polygonaceae | ant DIOS | Vogelknöterich    | top EAR  | 214 Ohrenleiden und Eiterfluss                                                                                                          |
| <i>Polygonum aviculare</i> agg.          | Polygonaceae | ant DIOS | Vogelknöterich    | syst FEV | 214 gegen das Wechselstieber                                                                                                            |
| <i>Polygonum aviculare</i> agg.          | Polygonaceae | ant DIOS | Vogelknöterich    | syst GAS | 214 Blutspeien, Bauchfluss, Cholera                                                                                                     |
| <i>Polygonum aviculare</i> agg.          | Polygonaceae | ant DIOS | Vogelknöterich    | top GAS  | 214 Erhitzung des Magens, bei Blutausswurf                                                                                              |
| <i>Polygonum aviculare</i> agg.          | Polygonaceae | ant DIOS | Vogelknöterich    | syst GYN | 214 den Fluss der Weiber                                                                                                                |



|                                  |               |       |      |                     |      |     |                   |                                                                       |
|----------------------------------|---------------|-------|------|---------------------|------|-----|-------------------|-----------------------------------------------------------------------|
| <i>Polygonum aviculare</i> aggr. | Polygonaceae  | ant   | DIOS | Vogelknöterich      | svst | URO | 214               | Harnzwang leiden, er treibt auch stark den Harn                       |
| <i>Polygonum aviculare</i> aggr. | Polygonaceae  | mon   | HvB  | Knöterich           | svst | OTH | 214               | hilft er gegen den Biss giftiger Thiere                               |
| <i>Polygonum aviculare</i> aggr. | Polygonaceae  | ren   | LF   | Vogelknöterich      | svst | ANT | CCCLXIX / CCXXXV  | nützlich denen so von giftigen thieren gebissen sind                  |
| <i>Polygonum aviculare</i> aggr. | Polygonaceae  | ren   | LF   | Vogelknöterich      | svst | DER | CCCLXIX / CCXXXV  | geschwær an den gemenchten                                            |
| <i>Polygonum aviculare</i> aggr. | Polygonaceae  | ren   | LF   | Vogelknöterich      | top  | DER | CCCLXIX / CCXXXV  | in die nasen gethon stellt er das blut derselbigen                    |
| <i>Polygonum aviculare</i> aggr. | Polygonaceae  | ren   | LF   | Vogelknöterich      | top  | DER | CCCLXIX / CCXXXV  | das rotlauff                                                          |
| <i>Polygonum aviculare</i> aggr. | Polygonaceae  | ren   | LF   | Vogelknöterich      | top  | DER | CCCLXIX / CCXXXV  | allerley frische wunden                                               |
| <i>Polygonum aviculare</i> aggr. | Polygonaceae  | ren   | LF   | Vogelknöterich      | top  | EAR | CCCLXIX / CCXXXV  | legt der den schmerzen derselbigen [ohren]                            |
| <i>Polygonum aviculare</i> aggr. | Polygonaceae  | ren   | LF   | Vogelknöterich      | svst | FEV | CCCLXIX / CCXXXV  | gut zu dem feber                                                      |
| <i>Polygonum aviculare</i> aggr. | Polygonaceae  | ren   | LF   | Vogelknöterich      | svst | GAS | CCCLXIX / CCXXXV  | cholischen bauchfluss                                                 |
| <i>Polygonum aviculare</i> aggr. | Polygonaceae  | ren   | LF   | Vogelknöterich      | svst | GAS | CCCLXIX / CCXXXV  | stelle sie alle bauchfluss, roten rhur,                               |
| <i>Polygonum aviculare</i> aggr. | Polygonaceae  | ren   | LF   | Vogelknöterich      | svst | GAS | CCCLXIX / CCXXXV  | das blutspeien und sonst allerley bluten                              |
| <i>Polygonum aviculare</i> aggr. | Polygonaceae  | ren   | LF   | Vogelknöterich      | top  | GAS | CCCLXIX / CCXXXV  | leschen die grosse hitz des magens                                    |
| <i>Polygonum aviculare</i> aggr. | Polygonaceae  | ren   | LF   | Vogelknöterich      | top  | GAS | CCCLXIX / CCXXXV  | das blutspeien                                                        |
| <i>Polygonum aviculare</i> aggr. | Polygonaceae  | ren   | LF   | Vogelknöterich      | top  | GYN | CCCLXIX / CCXXXV  | stellt der frawen krankheyt                                           |
| <i>Polygonum aviculare</i> aggr. | Polygonaceae  | ren   | LF   | Vogelknöterich      | svst | GYN | CCCLXIX / CCXXXV  | der frawen zeit                                                       |
| <i>Polygonum aviculare</i> aggr. | Polygonaceae  | ren   | LF   | Vogelknöterich      | svst | RES | CCCLXIX / CCXXXV  | denen so blut speien                                                  |
| <i>Polygonum aviculare</i> aggr. | Polygonaceae  | ren   | LF   | Vogelknöterich      | n.d. | URO | CCCLXIX / CCXXXV  | treibt den harn, den stein und griess                                 |
| <i>Polygonum aviculare</i> aggr. | Polygonaceae  | s pop | JK   | Vogelknöterich      | svst | GAS | p. 384            | Durchfall                                                             |
| <i>Polygonum aviculare</i> aggr. | Polygonaceae  | s pop | JK   | Vogelknöterich      | svst | URO | p. 384            | Blasenleiden, Bettnässer                                              |
| <i>Polygonum aviculare</i> aggr. | Polygonaceae  | s pop | KN   | Vogelknöterich      | svst | GAS | p. 490            | reinigend auf Leber und Magen                                         |
| <i>Polygonum aviculare</i> aggr. | Polygonaceae  | s pop | KN   | Vogelknöterich      | svst | RES | p. 490            | reinigend auf Brust                                                   |
| <i>Polygonum aviculare</i> aggr. | Polygonaceae  | s pop | KN   | Vogelknöterich      | svst | URO | p. 490            | Nierenkies und -steinchen                                             |
| <i>Polygonum aviculare</i> aggr. | Polygonaceae  | s pop | UB   | Vogelknöterich      | svst | RES | p. 227            | Lungenstärkung                                                        |
| <i>Polygonum aviculare</i> aggr. | Polygonaceae  | s pop | WI   | Vogelknöterich      | svst | DER | p. 453            | Volksheilkunde: Hämorrhoiden / Hautaffektionen                        |
| <i>Polygonum aviculare</i> aggr. | Polygonaceae  | s pop | WI   | Vogelknöterich      | svst | RES | p. 453            | Volksheilkunde: Expectorans und Sekretolytikum                        |
| <i>Polypodium vulgare</i> L.     | Polypodiaceae | ant   | DIOS | Tüpfelfarn          | svst | DER | 261               | wirkt auch gut bei [Verdrehungen und] Rissen zwischen den Fingern     |
| <i>Polypodium vulgare</i> L.     | Polypodiaceae | ant   | DIOS | Tüpfelfarn          | svst | GAS | 261               | führt sie Schleim und Galle ab                                        |
|                                  |               |       |      |                     |      |     |                   | Zum Purgiren wird sie mit Hühnerfleisch oder Fischen, Bete oder       |
| <i>Polypodium vulgare</i> L.     | Polypodiaceae | ant   | DIOS | Tüpfelfarn          | svst | HUM | 261               | Malve gekocht gegeben                                                 |
| <i>Polypodium vulgare</i> L.     | Polypodiaceae | ant   | DIOS | Tüpfelfarn          | top  | SKE | 261               | wirkt auch gut bei Verdrehungen [und Rissen zwischen den Fingern]     |
|                                  |               |       |      |                     |      |     |                   | der in den Eingeweidn Schmerzen hat, nehme, wenn er mager ist         |
| <i>Polypodium vulgare</i> L.     | Polypodiaceae | mon   | HvB  | Engelsüss           | svst | GAS | 1-205             | und nicht viel krank ist                                              |
| <i>Polypodium vulgare</i> L.     | Polypodiaceae | ren   | LF   | Engelsüss           | top  | DER | CCXXIII / CCXXIII | heylet die schrunden an den henden und füssen                         |
|                                  |               |       |      |                     |      |     |                   | in die nasen gethon verzert das übrige fleysch darin Polypum          |
| <i>Polypodium vulgare</i> L.     | Polypodiaceae | ren   | LF   | Engelsüss           | top  | DER | CCXXIII / CCXXIII | geheysen                                                              |
| <i>Polypodium vulgare</i> L.     | Polypodiaceae | ren   | LF   | Engelsüss           | svst | GAS | CCXXIII / CCXXIII | derselbig purgiert auch                                               |
| <i>Polypodium vulgare</i> L.     | Polypodiaceae | ren   | LF   | Engelsüss           | svst | GAS | CCXXIII / CCXXIII | treibt aus allerley gallen und schleim durch den stulgang             |
|                                  |               |       |      |                     |      |     |                   | desgleichen thut sie auch [treibt aus allerley gallen und schleim     |
| <i>Polypodium vulgare</i> L.     | Polypodiaceae | ren   | LF   | Engelsüss           | svst | GAS | CCXXIII / CCXXIII | durch den stulgang]                                                   |
| <i>Polypodium vulgare</i> L.     | Polypodiaceae | ren   | LF   | Engelsüss           | top  | SKE | CCXXIII / CCXXIII | ist nützlich denen so sich verrenckt haben                            |
| <i>Polypodium vulgare</i> L.     | Polypodiaceae | s pop | JK   | Engelsüss           | svst | GAS | p. 348            | Wurmmittel                                                            |
| <i>Polypodium vulgare</i> L.     | Polypodiaceae | s pop | JK   | Engelsüss           | svst | RES | p. 348            | Enge auf der Brust, Astmah und Husten                                 |
| <i>Polypodium vulgare</i> L.     | Polypodiaceae | s pop | JK   | Engelsüss           | svst | RES | p. 348            | Husten und Katarrh                                                    |
| <i>Polypodium vulgare</i> L.     | Polypodiaceae | s pop | JK   | Engelsüss           | svst | URO | p. 348            | Wasserbeschwerden                                                     |
| <i>Polypodium vulgare</i> L.     | Polypodiaceae | sci   | EMA  | Tüpfelfarn          | svst | GAS | HMPC/600668/2007  | occasional constipation.                                              |
|                                  |               |       |      |                     |      |     |                   | Traditional herbal medicinal product used as an expectorant in        |
| <i>Polypodium vulgare</i> L.     | Polypodiaceae | sci   | EMA  | Tüpfelfarn          | svst | RES | HMPC/600668/2007  | cough and cold.                                                       |
| <i>Potentilla</i> sp.            | Rosaceae      | ant   | DIOS | Blutwurz            | svst | ANT | 222               | gegen tödtliche Gifte                                                 |
| <i>Potentilla</i> sp.            | Rosaceae      | ant   | DIOS | Blutwurz            | svst | DER | 222               | heilf Darmruhr und stuhlfallen                                        |
| <i>Potentilla</i> sp.            | Rosaceae      | ant   | DIOS | Blutwurz            | top  | DER | 222               | Wunden und fisten                                                     |
|                                  |               |       |      |                     |      |     |                   | auch beseitigt es als Mundspülwasser die Mundfäule und besänftigt     |
| <i>Potentilla</i> sp.            | Rosaceae      | ant   | DIOS | Blutwurz            | top  | DER | 222               | als Gurgelwasser die Rauheit der Luftröhre                            |
|                                  |               |       |      |                     |      |     |                   | als Umschlag kriechende Geschwüre auf, vertheilt Drüsen am Halse,     |
|                                  |               |       |      |                     |      |     |                   | Verhärtungen, Aneurysmen und Abscesse, heilt roseartige               |
| <i>Potentilla</i> sp.            | Rosaceae      | ant   | DIOS | Blutwurz            | top  | DER | 222               | Entzündungen, überwachene Fingernägel, Feigwarzen und Krätze          |
| <i>Potentilla</i> sp.            | Rosaceae      | ant   | DIOS | Blutwurz            | svst | FEV | 222               | gegen die periodischen Fieber                                         |
| <i>Potentilla</i> sp.            | Rosaceae      | ant   | DIOS | Blutwurz            | svst | GAS | 222               | Gelbsucht                                                             |
| <i>Potentilla</i> sp.            | Rosaceae      | ant   | DIOS | Blutwurz            | svst | GAS | 222               | hilft es bei Bauchfluss und Dysenterie                                |
|                                  |               |       |      |                     |      |     |                   | Saft der zarten Wurzel wirkt bei Leber- [und Lungenleiden und         |
| <i>Potentilla</i> sp.            | Rosaceae      | ant   | DIOS | Blutwurz            | svst | GAS | 222               | gegen tödtliche Gifte]                                                |
|                                  |               |       |      |                     |      |     |                   | wird auch als Reinigungsmittel und Sühnemittel sowie als Mittel gegen |
| <i>Potentilla</i> sp.            | Rosaceae      | ant   | DIOS | Blutwurz            | svst | HUM | 222               | Blutfluss geschnitten                                                 |
| <i>Potentilla</i> sp.            | Rosaceae      | ant   | DIOS | Blutwurz            | svst | NER | 222               | Auch bei Epilepsie helfen die Blätter                                 |
|                                  |               |       |      |                     |      |     |                   | Saft der zarten Wurzel wirkt bei [Leber- und Lungenleiden [und        |
| <i>Potentilla</i> sp.            | Rosaceae      | ant   | DIOS | Blutwurz            | svst | RES | 222               | gegen tödtliche Gifte]                                                |
| <i>Potentilla</i> sp.            | Rosaceae      | ant   | DIOS | Blutwurz            | svst | SKE | 222               | Gicht- und Ischiaskrankn                                              |
| <i>Potentilla</i> sp.            | Rosaceae      | ant   | DIOS | Blutwurz            | top  | TEE | 222               | Zahnschmerzen zu heilen,                                              |
| <i>Potentilla</i> sp.            | Rosaceae      | mon   | HvB  | Kriechendes Fingerl | top  | EYE | 1-166             | und wenn jemand an Nebel in den Augen leidet                          |
| <i>Potentilla</i> sp.            | Rosaceae      | mon   | HvB  | Kriechendes Fingerl | top  | FEV | 1-166             | umwinde damit den Bauch des Menschen, der starkes Fieber hat          |
| <i>Potentilla</i> sp.            | Rosaceae      | mon   | HvB  | Kriechendes Fingerl | svst | GAS | 1-166             | auch wer Gelbsucht hat                                                |
|                                  |               |       |      |                     |      |     |                   | und ein Mensch der überflüssige und giftige das heisst eitlige        |
| <i>Potentilla</i> sp.            | Rosaceae      | mon   | HvB  | Blutwurz            | svst | HUM | 1-166             | Säfte in sich hat,                                                    |
| <i>Potentilla</i> sp.            | Rosaceae      | ren   | LF   | Fingerkraut         | top  | DER | CCCLV / CCXXXIX   | wunden und andere fressende schaden der fistel                        |
|                                  |               |       |      |                     |      |     |                   | gegurgelt heylet es die geschwær des munds und die fertigkeit         |
| <i>Potentilla</i> sp.            | Rosaceae      | ren   | LF   | Fingerkraut         | top  | DER | CCCLV / CCXXXIX   | oder verwundung des hals                                              |
| <i>Potentilla</i> sp.            | Rosaceae      | ren   | LF   | Fingerkraut         | top  | DER | CCCLV / CCXXXIX   | verzert sie die kroepff, herte, geschwulst un die rauden              |
| <i>Potentilla</i> sp.            | Rosaceae      | ren   | LF   | Fingerkraut         | svst | FEV | CCCLV / CCXXXIX   | verhindert das schütten des febers                                    |
| <i>Potentilla</i> sp.            | Rosaceae      | ren   | LF   | Fingerkraut         | svst | GAS | CCCLV / CCXXXIX   | geelsucht                                                             |
| <i>Potentilla</i> sp.            | Rosaceae      | ren   | LF   | Fingerkraut         | svst | GAS | CCCLV / CCXXXIX   | roten rhur, weetagen der gleych un hüfft?; stelle allerley bauchfluss |
| <i>Potentilla</i> sp.            | Rosaceae      | ren   | LF   | Fingerkraut         | svst | GAS | CCCLV / CCXXXIX   | gebresten der leber                                                   |
| <i>Potentilla</i> sp.            | Rosaceae      | ren   | LF   | Fingerkraut         | svst | NER | CCCLV / CCXXXIX   | heylen fallende sucht oder das vergicht                               |
| <i>Potentilla</i> sp.            | Rosaceae      | ren   | LF   | Fingerkraut         | svst | RES | CCCLV / CCXXXIX   | gebresten der lungen                                                  |
| <i>Potentilla</i> sp.            | Rosaceae      | ren   | LF   | Fingerkraut         | svst | RES | CCCLV / CCXXXIX   | und allerley gift                                                     |
| <i>Potentilla</i> sp.            | Rosaceae      | ren   | LF   | Fingerkraut         | top  | SKE | CCCLV / CCXXXIX   | heylen den bruch                                                      |
| <i>Potentilla</i> sp.            | Rosaceae      | ren   | LF   | Fingerkraut         | svst | SKE | CCCLV / CCXXXIX   | weetagen der gleych un hüfft                                          |
| <i>Potentilla</i> sp.            | Rosaceae      | ren   | LF   | Fingerkraut         | top  | TEE | CCCLV / CCXXXIX   | im mund warm gehalten mildert den weetagen der zaen                   |
| <i>Potentilla</i> sp.            | Rosaceae      | s pop | UB   | Blutwurz            | top  | DER | p. 303            | Wundbehandlung                                                        |
| <i>Potentilla</i> sp.            | Rosaceae      | s pop | UB   | Blutwurz            | top  | DER | p. 303            | Wundbehandlung                                                        |
| <i>Potentilla</i> sp.            | Rosaceae      | s pop | UB   | Blutwurz            | svst | GAS | p. 121            | Durchfall                                                             |
| <i>Potentilla</i> sp.            | Rosaceae      | s pop | UB   | Blutwurz            | svst | GAS | p. 121            | Durchfall                                                             |
| <i>Potentilla</i> sp.            | Rosaceae      | s pop | UB   | Blutwurz            | svst | GAS | p. 121            | Durchfall                                                             |
| <i>Potentilla</i> sp.            | Rosaceae      | s pop | UB   | Blutwurz            | svst | HUM | p. 460            | Gerbstoffe zum Binden; Ausleitung und Regeneration                    |
| <i>Potentilla</i> sp.            | Rosaceae      | s pop | UB   | Blutwurz            | svst | HUM | p. 460            | Gerbstoffe zum Binden; Ausleitung und Regeneration                    |
| <i>Potentilla</i> sp.            | Rosaceae      | s pop | UB   | Blutwurz            | svst | HUM | p. 460            | Gerbstoffe zum Binden; Ausleitung und Regeneration                    |
|                                  |               |       |      |                     |      |     |                   | Traditional herbal medicinal product for the symptomatic treatment    |
| <i>Potentilla</i> sp.            | Rosaceae      | sci   | EMA  | Blutwurz            | top  | DER | A/HMPC/5513/2010  | of minor inflammations of the oral mucosa.                            |
|                                  |               |       |      |                     |      |     |                   | Traditional herbal medicinal product for the symptomatic treatment    |
| <i>Potentilla</i> sp.            | Rosaceae      | sci   | EMA  | Blutwurz            | svst | GAS | A/HMPC/5513/2010  | mild diarrhoea                                                        |
|                                  |               |       |      |                     |      |     |                   | Traditional herbal medicinal product for symptomatic treatment of     |
| <i>Potentilla</i> sp.            | Rosaceae      | sci   | EMA  | Blutwurz            | svst | GAS | A/HMPC/5513/2010  | mild diarrhoea                                                        |
| <i>Prunus</i> sp.                | Rosaceae      | ant   | DIOS | Pflaume             | top  | DER | 110               | Mit Essig aber eingegeben heilt es die Flechte bei den Kindern        |
| <i>Prunus</i> sp.                | Rosaceae      | ant   | DIOS | Pflaume             | svst | GAS | 110               | ist dem Magen sehr zuträglich und stellt den Durchfall                |
| <i>Prunus</i> sp.                | Rosaceae      | ant   | DIOS | Pflaume             | svst | GAS | 110               | Affectionen des Zapfchens, des Zahnfleischs und der Mandeln           |
|                                  |               |       |      |                     |      |     |                   | eingekehtem Most gesotten wird sie dem Magen wohlthuender und         |
| <i>Prunus</i> sp.                | Rosaceae      | ant   | DIOS | Schlehe             | svst | GAS | 110               | den Durchfall mehr hemmen                                             |
| <i>Prunus</i> sp.                | Rosaceae      | ant   | DIOS | Pflaume             | svst | URO | 110               | den Stein zu zertrümmern                                              |

|                             |              |       |      |                    |      |     |                                                                                                                                                          |
|-----------------------------|--------------|-------|------|--------------------|------|-----|----------------------------------------------------------------------------------------------------------------------------------------------------------|
| <i>Prunus</i> sp.           | Rosaceae     | mon   | HvB  | Pflaumenbaum       | top  | DER | 3-7 und wenn irgendwelche Würmer das Fleisch des Menschen fressen und wenn Dein Kopf schuppig ist oder weikt, wasche ihn oft mit                         |
| <i>Prunus</i> sp.           | Rosaceae     | mon   | HvB  | Pflaumenbaum       | top  | DER | 3-7 dieser Lauge                                                                                                                                         |
| <i>Prunus</i> sp.           | Rosaceae     | mon   | HvB  | Schlehdorn         | top  | DER | 3-53 wenn Krebs an ihm nagen, Geschwüre und wenn einem Menschen die Lippen seines Mundes anschwellen                                                     |
| <i>Prunus</i> sp.           | Rosaceae     | mon   | HvB  | Pflaumenbaum       | top  | DER | 3-7 und sich aufblasen                                                                                                                                   |
| <i>Prunus</i> sp.           | Rosaceae     | mon   | HvB  | Schlehdorn         | syst | GAS | 3-53 schwach im Magen und wenn jemand durch magische oder verwünschende Worte von Sinnen kommt, dann nimm Erde, die um die Wurzeln jenes Baumes          |
| <i>Prunus</i> sp.           | Rosaceae     | mon   | HvB  | Pflaumenbaum       | top  | NER | 3-7 legt Gichtkrank, so dass ihm die Sinne schwinden und er davon verrückt                                                                               |
| <i>Prunus</i> sp.           | Rosaceae     | mon   | HvB  | Schlehdorn         | syst | NER | 3-53 wird                                                                                                                                                |
| <i>Prunus</i> sp.           | Rosaceae     | mon   | HvB  | Pflaumenbaum       | syst | RES | 3-7 trockener Husten                                                                                                                                     |
| <i>Prunus</i> sp.           | Rosaceae     | mon   | HvB  | Schlehdorn         | syst | SKE | 3-53 Gicht in ihm aber wenn die Finger und die Hände von der Gicht sich ständig                                                                          |
| <i>Prunus</i> sp.           | Rosaceae     | mon   | HvB  | Pflaumenbaum       | top  | SKE | 3-7 zitternd bewegen sind gut zu dem geschwollen zapflin und mandeln (dann sie                                                                           |
| <i>Prunus</i> sp.           | Rosaceae     | ren   | LF   | Zwetschgenbaum     | top  | DER | CCXXVI / CLIII treiben den Fluss hinter sich)                                                                                                            |
| <i>Prunus</i> sp.           | Rosaceae     | ren   | LF   | Schwarzdorn        | top  | DER | CCXXVII / CLIII heilt es die gicht, zittern oder raufen der kinder                                                                                       |
| <i>Prunus</i> sp.           | Rosaceae     | ren   | LF   | Zwetschgenbaum     | syst | GAS | CCXXVI / CLIII lindern den bauch                                                                                                                         |
| <i>Prunus</i> sp.           | Rosaceae     | ren   | LF   | Schwarzdorn        | syst | GAS | CCXXVII / CLIII ziehen sehr zusammen und stellen den bauchfluss                                                                                          |
| <i>Prunus</i> sp.           | Rosaceae     | ren   | LF   | Schwarzdorn        | syst | GAS | CCXXVII / CLIII zermalt den stein                                                                                                                        |
| <i>Prunus</i> sp.           | Rosaceae     | s pop | BVA  | Schlehdorn - Schw  | syst | DER | p. 189 Entschlackung bei Hautkrankheiten Schleimhautentzündungen, entzündetem Zahnfleisch,                                                               |
| <i>Prunus</i> sp.           | Rosaceae     | s pop | BVA  | Schlehdorn - Schw  | top  | DER | p. 189 Zahnfleischbuten                                                                                                                                  |
| <i>Prunus</i> sp.           | Rosaceae     | s pop | BVA  | Schlehdorn - Schw  | syst | GAS | p. 189 Verstopfung (Kinder), Verdauungsstörungen, Magenstärkung                                                                                          |
| <i>Prunus</i> sp.           | Rosaceae     | s pop | BVA  | Schlehdorn - Schw  | syst | HUM | p. 189 Stärkung, Blutreinigung                                                                                                                           |
| <i>Prunus</i> sp.           | Rosaceae     | s pop | BVA  | Schlehdorn - Schw  | top  | TEE | p. 189 entzündetem Zahnfleisch, Zahnfleischbuten                                                                                                         |
| <i>Prunus</i> sp.           | Rosaceae     | s pop | BVA  | Schlehdorn - Schw  | syst | URO | p. 189 Schliessmuskelschwäche der Blase, Afters, Bettnässen                                                                                              |
| <i>Prunus</i> sp.           | Rosaceae     | s pop | JK   | Schlehe            | syst | GAS | p. 416 Durchfall                                                                                                                                         |
| <i>Prunus</i> sp.           | Rosaceae     | s pop | JK   | Schlehe            | syst | SKE | p. 416 Gichtige                                                                                                                                          |
| <i>Prunus</i> sp.           | Rosaceae     | s pop | KN   | Schlehe            | syst | GAS | p. 462 Abführmittel, Magenmittel                                                                                                                         |
| <i>Prunus</i> sp.           | Rosaceae     | s pop | UB   | Schwarzdorn / Schl | syst | TON | p. 378 Tonikum zur Herzkraftigung, in der Rekonvaleszenz, beim Altersherz Volksmedizin: Gurgelmittel bei Mund- und Hals- und                             |
| <i>Prunus</i> sp.           | Rosaceae     | s pop | WI   | Schlehe            | syst | DER | p. 461 Zahnfleischentzündungen Volksmedizin: Gurgelmittel bei Mund- und Hals- und                                                                        |
| <i>Prunus</i> sp.           | Rosaceae     | s pop | WI   | Schlehe            | top  | DER | p. 461 Zahnfleischentzündungen                                                                                                                           |
| <i>Prunus</i> sp.           | Rosaceae     | s pop | WI   | Schlehe            | syst | GAS | p. 461 Volksmedizin: Magenschwäche                                                                                                                       |
| <i>Prunus</i> sp.           | Rosaceae     | s pop | WI   | Schlehe            | syst | RES | p. 461 Volksmedizin: Expektorans                                                                                                                         |
| <i>Prunus</i> sp.           | Rosaceae     | s pop | WI   | Schlehe            | syst | URO | p. 461 Volksmedizin: Diuretikum                                                                                                                          |
| <i>Prunus</i> sp.           | Rosaceae     | s pop | WI   | Schlehe            | syst | URO | p. 461 Volksmedizin: Purgans und Diuretikum                                                                                                              |
| <i>Prunus</i> sp.           | Rosaceae     | s pop | WI   | Schlehe            | syst | URO | p. 461 Volksmedizin: Diuretikum                                                                                                                          |
| <i>Pyrus communis</i> aggr. | Rosaceae     | ant   | DIOS | Birne              | syst | ANT | 109 hilft kräftig bei Vergiftungen durch Pilze                                                                                                           |
| <i>Pyrus communis</i> aggr. | Rosaceae     | ant   | DIOS | Birne              | top  | DER | 109 eignen sie sich zu verteilenden Umschlägen                                                                                                           |
| <i>Pyrus communis</i> aggr. | Rosaceae     | ant   | DIOS | Birne              | syst | GAS | 109 stellen den Durchfall jedoch bewirken sie bei ihm eine gute Verdauung, weil sie die Fäulnis                                                          |
| <i>Pyrus communis</i> aggr. | Rosaceae     | mon   | HvB  | Birnbaum           | syst | GAS | 3-2 mit abführt                                                                                                                                          |
| <i>Pyrus communis</i> aggr. | Rosaceae     | mon   | HvB  | Birnbaum           | syst | NER | 3-2 weil es die Migräne wegnimmt die Dämpfigkeit mindert, welche die rohen Birnen in der Brust der                                                       |
| <i>Pyrus communis</i> aggr. | Rosaceae     | mon   | HvB  | Birnbaum           | syst | RES | 3-2 Menschen verursachen Und alle üblichen Säfte, die im Menschen sind, vernichtet sie und reinigt den Mensch so, wie ein Geschirr vom Schmutz gereinigt |
| <i>Pyrus communis</i> aggr. | Rosaceae     | mon   | HvB  | Birnbaum           | syst | RES | 3-2 wird                                                                                                                                                 |
| <i>Pyrus communis</i> aggr. | Rosaceae     | ren   | UB   | Birne              | syst | GAS | p. 246 wasserabweisende Früchte, denen die Speise zuwider ist/ best                                                                                      |
| <i>Pyrus communis</i> aggr. | Rosaceae     | s pop | UB   | Birne              | syst | URO | p. 246 wasserabweisende Früchte                                                                                                                          |
| <i>Pyrus communis</i> aggr. | Rosaceae     | s pop | UB   | Birne              | syst | URO | p. 248 harntreibend                                                                                                                                      |
| <i>Quercus robur</i> aggr.  | Fagaceae     | ant   | DIOS | Eiche              | syst | ANT | 104 Sie wirken gegessen gegen giftige Tiere; auch ihre Abkochung und die der Rinde mit Kuhmilch getrunken hilft gegen Gift.                              |
| <i>Quercus robur</i> aggr.  | Fagaceae     | ant   | DIOS | Eiche              | top  | DER | 104 lindern sie als Umschlag Entzündungen, mit gesalzenem Schweinefett sind sie als Umschlag ein gutes Mittel gegen bösartige                            |
| <i>Quercus robur</i> aggr.  | Fagaceae     | ant   | DIOS | Eiche              | top  | DER | 104 Verhärtungen und schlimme Geschwüre                                                                                                                  |
| <i>Quercus robur</i> aggr.  | Fagaceae     | ant   | DIOS | Eiche              | top  | DER | 104 Die Blätter aber verkleben frisch geschlagene Wunden                                                                                                 |
| <i>Quercus robur</i> aggr.  | Fagaceae     | ant   | DIOS | Eiche              | top  | DER | 104 Die Blätter aber verkleben frisch geschlagene Wunden                                                                                                 |
| <i>Quercus robur</i> aggr.  | Fagaceae     | ant   | DIOS | Eiche              | syst | GAS | 104 die am Magen, an Dysenterie und an Blutspeien leiden                                                                                                 |
| <i>Quercus robur</i> aggr.  | Fagaceae     | ant   | DIOS | Eiche              | top  | GYN | 104 den an Fluss leidenden Frauen                                                                                                                        |
| <i>Quercus robur</i> aggr.  | Fagaceae     | ant   | DIOS | Eiche              | syst | URO | 104 sind sie harntreibend                                                                                                                                |
| <i>Quercus robur</i> aggr.  | Fagaceae     | mon   | HvB  | Eiche              | n.d. | OTH | 3-25 Für ein Heilmittel ist weder das Holz noch die Frucht zu gebrauchen                                                                                 |
| <i>Quercus robur</i> aggr.  | Fagaceae     | ren   | LF   | Steineiche         | syst | ANT | CCXIX / LXXXIII widerstehen allerley gift                                                                                                                |
| <i>Quercus robur</i> aggr.  | Fagaceae     | ren   | LF   | Steineiche         | top  | DER | CCXIX / LXXXIII zu den boesen herten geschwulsten un alten schaden                                                                                       |
| <i>Quercus robur</i> aggr.  | Fagaceae     | ren   | LF   | Steineiche         | top  | DER | CCXIX / LXXXIII heylen allerley wunden                                                                                                                   |
| <i>Quercus robur</i> aggr.  | Fagaceae     | ren   | LF   | Steineiche         | top  | DER | CCXIX / LXXXIII alerley fluss so sie auf das zartfleisch oder zapflin fallen, verhindern                                                                 |
| <i>Quercus robur</i> aggr.  | Fagaceae     | ren   | LF   | Steineiche         | top  | DER | CCXIX / LXXXIII mundeheule                                                                                                                               |
| <i>Quercus robur</i> aggr.  | Fagaceae     | ren   | LF   | Steineiche         | top  | DER | CCXIX / LXXXIII farben hiezu schwarz                                                                                                                     |
| <i>Quercus robur</i> aggr.  | Fagaceae     | ren   | LF   | Steineiche         | syst | GAS | CCXIX / LXXXIII rote rhur, das blutspeien, stellen den bauchfluss                                                                                        |
| <i>Quercus robur</i> aggr.  | Fagaceae     | ren   | LF   | Steineiche         | syst | GAS | CCXIX / LXXXIII roten rhur                                                                                                                               |
| <i>Quercus robur</i> aggr.  | Fagaceae     | ren   | LF   | Steineiche         | syst | GYN | CCXIX / LXXXIII stellen der frauen krankheit                                                                                                             |
| <i>Quercus robur</i> aggr.  | Fagaceae     | ren   | LF   | Steineiche         | top  | GYN | CCXIX / LXXXIII verhindern das aufgehen der muter undd der weiber bloedigkeit                                                                            |
| <i>Quercus robur</i> aggr.  | Fagaceae     | ren   | LF   | Steineiche         | top  | OTH | CCXIX / LXXXIII stellen das blut                                                                                                                         |
| <i>Quercus robur</i> aggr.  | Fagaceae     | ren   | LF   | Steineiche         | syst | URO | CCXIX / LXXXIII treiben den harn                                                                                                                         |
| <i>Quercus robur</i> aggr.  | Fagaceae     | s pop | JK   | Eiche              | top  | DER | p. 345 Wunden, Geschwüren und Lupus                                                                                                                      |
| <i>Quercus robur</i> aggr.  | Fagaceae     | s pop | JK   | Eiche              | top  | DER | p. 345 Angina und sonstige Halsleiden                                                                                                                    |
| <i>Quercus robur</i> aggr.  | Fagaceae     | s pop | JK   | Eiche              | syst | GAS | p. 345 andauerndem Durchfall, Blutspeien                                                                                                                 |
| <i>Quercus robur</i> aggr.  | Fagaceae     | s pop | JK   | Eiche              | syst | URO | p. 345 unfreiwilligem Wasserlösen, Blutfluss                                                                                                             |
| <i>Quercus robur</i> aggr.  | Fagaceae     | s pop | KN   | Eiche              | top  | DER | p. 463 verdrängen die dicken Hälse, Kropfmittel, mit den Drüsen räume                                                                                    |
| <i>Quercus robur</i> aggr.  | Fagaceae     | s pop | KN   | Eiche              | top  | DER | p. 463 diese Wickel nicht weniger gründlich auf                                                                                                          |
| <i>Quercus robur</i> aggr.  | Fagaceae     | s pop | KN   | Eiche              | top  | DER | p. 463 Mastdarmvorfall, Mastdarmfisteln, harte Geschwülste                                                                                               |
| <i>Quercus robur</i> aggr.  | Fagaceae     | s pop | KN   | Eiche              | top  | DER | p. 463 oberflächliche Wunden, oberflächliche Ekzeme, Frostbeulen                                                                                         |
| <i>Quercus robur</i> aggr.  | Fagaceae     | s pop | KN   | Eiche              | syst | GAS | p. 463 katarrhalischen Zustände des Verdauungsapparates, so auf                                                                                          |
| <i>Quercus robur</i> aggr.  | Fagaceae     | s pop | KN   | Eiche              | syst | GAS | p. 463 Durchfälle                                                                                                                                        |
| <i>Quercus robur</i> aggr.  | Fagaceae     | s pop | KN   | Eiche              | top  | TON | p. 412 skrophulöse Kinder                                                                                                                                |
| <i>Quercus robur</i> aggr.  | Fagaceae     | s pop | UB   | Eiche              | top  | DER | p. 328 allgemeine Behandlung von Ekzemen, Neurodermitis, Psoriasis                                                                                       |
| <i>Quercus robur</i> aggr.  | Fagaceae     | s pop | UB   | Eiche              | top  | DER | p. 328 allgemeine Behandlung von Ekzemen, Neurodermitis, Psoriasis                                                                                       |
| <i>Quercus robur</i> aggr.  | Fagaceae     | s pop | UB   | Eiche              | top  | DER | p. 328 allgemeine Behandlung von Ekzemen, Neurodermitis, Psoriasis                                                                                       |
| <i>Quercus robur</i> aggr.  | Fagaceae     | s pop | UB   | Eiche              | syst | GAS | p. 122 Durchfallerkrankungen                                                                                                                             |
| <i>Quercus robur</i> aggr.  | Fagaceae     | sci   | EMA  | Eiche              | top  | DER | A/HMPC/3203/2009 Traditional herbal medicinal product for symptomatic treatment of minor inflammation of the oral mucosa or skin                         |
| <i>Quercus robur</i> aggr.  | Fagaceae     | sci   | EMA  | Eiche              | top  | DER | A/HMPC/3203/2009 Traditional herbal medicinal product for itching and burning haemorrhoids                                                               |
| <i>Quercus robur</i> aggr.  | Fagaceae     | sci   | EMA  | Eiche              | syst | GAS | A/HMPC/3203/2009 Traditional herbal medicinal prduct for symptomatic treatment of mild diarrhoea                                                         |
| <i>Quercus robur</i> aggr.  | Fagaceae     | sci   | WI   | Eiche              | syst | GAS | p. 474 Stomachikum, bei unspezifischen Durchfallerkrankungen ebenso erweist er sich mit Wein getrunken heilsam gegen den Biss                            |
| <i>Raphanus sativus</i> L.  | Brassicaceae | ant   | DIOS | Retlich            | syst | ANT | 142 der Hornschlange                                                                                                                                     |
| <i>Raphanus sativus</i> L.  | Brassicaceae | ant   | DIOS | Retlich            | syst | ANT | 142 Gegessen oder getrunken hilft sie bei denen, die durch Essen oder                                                                                    |
| <i>Raphanus sativus</i> L.  | Brassicaceae | ant   | DIOS | Retlich            | top  | ANT | 142 Trinken von (giftigen) Pilzen Erstickungsanfälle bekommen                                                                                            |
| <i>Raphanus sativus</i> L.  | Brassicaceae | ant   | DIOS | Retlich            | top  | ANT | 142 Sie hilft den von giftigen Tieren Gebissenen                                                                                                         |
| <i>Raphanus sativus</i> L.  | Brassicaceae | ant   | DIOS | Retlich            | top  | DER | 142 Mit Essig aufgelegt endlich reißt er Gangrän kräftig rund herum auf                                                                                  |
| <i>Raphanus sativus</i> L.  | Brassicaceae | ant   | DIOS | Retlich            | top  | DER | 142 Bei Entzündung der Schlundmuskeln (Angina) hilft er gekocht als                                                                                      |
| <i>Raphanus sativus</i> L.  | Brassicaceae | ant   | DIOS | Retlich            | top  | DER | 142 Gurgelmittel mit warmem Sauerhonig                                                                                                                   |

|                            |              |       |      |            |          |                                                                                                                                                                                        |
|----------------------------|--------------|-------|------|------------|----------|----------------------------------------------------------------------------------------------------------------------------------------------------------------------------------------|
|                            |              |       |      |            |          | Mit Honig bringt sie fressende Geschwüre zum Stillstand und entfernt Sugillationen unter den Augen; und erzeugt nach der Fuchskrankheit dichtes Haar, Mit Taumelloichmehl entfernt sie |
| <i>Raphanus sativus</i> L. | Brassicaceae | ant   | DIOS | Rettich    | top DER  | 142. Leberflecken                                                                                                                                                                      |
|                            |              |       |      |            |          | Er bekommt auch dem Bauche, wenn man ihn dazu (d.h. nach der Mahlzeit) nimmt, indem er die Verteilung der Nahrungssäfte                                                                |
| <i>Raphanus sativus</i> L. | Brassicaceae | ant   | DIOS | Rettich    | syst GAS | 142 befördert;                                                                                                                                                                         |
| <i>Raphanus sativus</i> L. | Brassicaceae | ant   | DIOS | Rettich    | syst GYN | 142 befördert auch die Menstruation                                                                                                                                                    |
|                            |              |       |      |            |          | Vorher genossen ist er auch bei denen angebracht, die erbrechen                                                                                                                        |
| <i>Raphanus sativus</i> L. | Brassicaceae | ant   | DIOS | Rettich    | syst HUM | 142 wollen                                                                                                                                                                             |
| <i>Raphanus sativus</i> L. | Brassicaceae | ant   | DIOS | Rettich    | syst NER | 142 Er schärft aber auch die Sinne                                                                                                                                                     |
| <i>Raphanus sativus</i> L. | Brassicaceae | ant   | DIOS | Rettich    | syst OTH | 142 reinigt die Milz                                                                                                                                                                   |
| <i>Raphanus sativus</i> L. | Brassicaceae | ant   | DIOS | Rettich    | top OTH  | 142 Als Umschlag ist sie auch bei Milzkranken angebracht                                                                                                                               |
|                            |              |       |      |            |          | an chronischem Husten leiden und bei denen sich Verdichtungen in                                                                                                                       |
| <i>Raphanus sativus</i> L. | Brassicaceae | ant   | DIOS | Rettich    | svst RES | 142 der Brust gebildet haben                                                                                                                                                           |
| <i>Raphanus sativus</i> L. | Brassicaceae | ant   | DIOS | Rettich    | svst URO | 142 treibt den Harn                                                                                                                                                                    |
| <i>Raphanus sativus</i> L. | Brassicaceae | ant   | DIOS | Rettich    | svst URO | 142 ist aber den Wassersüchtigen wohltuend                                                                                                                                             |
| <i>Raphanus sativus</i> L. | Brassicaceae | mon   | HvB  | Rettich    | syst GAS | 1-89 vermindert die schädlichen Säfte der Eingeweide                                                                                                                                   |
| <i>Raphanus sativus</i> L. | Brassicaceae | mon   | HvB  | Rettich    | syst HUM | 1-89 Aber wer viel Schleim in sich hat                                                                                                                                                 |
| <i>Raphanus sativus</i> L. | Brassicaceae | mon   | HvB  | Rettich    | syst NER | 1-89 reinigt er das Gehirn                                                                                                                                                             |
|                            |              |       |      |            |          | gut denen von nätern gestochen sind, bekommt wohl, denen so                                                                                                                            |
| <i>Raphanus sativus</i> L. | Brassicaceae | ren   | LF   | Rettich    | n.d. ANT | CCCLXXV / CCLVI toedlich pfliffeling gegessen haben                                                                                                                                    |
| <i>Raphanus sativus</i> L. | Brassicaceae | ren   | LF   | Rettich    | syst ANT | CCCLXXV / CCLVI ist gut wider das gift                                                                                                                                                 |
| <i>Raphanus sativus</i> L. | Brassicaceae | ren   | LF   | Rettich    | syst CAR | CCCLXXV / CCLVI er ist den wasserüchtigen gut                                                                                                                                          |
|                            |              |       |      |            |          | heylet er die umb sich fressenden schaden, verzert auch das                                                                                                                            |
| <i>Raphanus sativus</i> L. | Brassicaceae | ren   | LF   | Rettich    | top DER  | CCCLXXV / CCLVI undergrunnen blut, macht har wachsen                                                                                                                                   |
| <i>Raphanus sativus</i> L. | Brassicaceae | ren   | LF   | Rettich    | top DER  | CCCLXXV / CCLVI vertreibt er allerley maeler und flecken under dem angesicht                                                                                                           |
| <i>Raphanus sativus</i> L. | Brassicaceae | ren   | LF   | Rettich    | top DER  | CCCLXXV / CCLVI vertreibt die schwarzen maeler und flecken am leib                                                                                                                     |
| <i>Raphanus sativus</i> L. | Brassicaceae | ren   | LF   | Rettich    | top DER  | CCCLXXV / CCLVI hals geschwaer                                                                                                                                                         |
| <i>Raphanus sativus</i> L. | Brassicaceae | ren   | LF   | Rettich    | syst GAS | CCCLXXV / CCLVI macht speien und kotzen                                                                                                                                                |
|                            |              |       |      |            |          | nach dem essen genommen würt, hilft er zu der aufteylung der                                                                                                                           |
|                            |              |       |      |            |          | speiss in die glider, vor dem essen ist er nützlich denen so undewen                                                                                                                   |
| <i>Raphanus sativus</i> L. | Brassicaceae | ren   | LF   | Rettich    | svst GAS | CCCLXXV / CCLVI wollen                                                                                                                                                                 |
| <i>Raphanus sativus</i> L. | Brassicaceae | ren   | LF   | Rettich    | svst GAS | CCCLXXV / CCLVI macht speien und treibt den harn                                                                                                                                       |
| <i>Raphanus sativus</i> L. | Brassicaceae | ren   | LF   | Rettich    | svst OTH | CCCLXXV / CCLVI ren milzkrancken                                                                                                                                                       |
| <i>Raphanus sativus</i> L. | Brassicaceae | ren   | LF   | Rettich    | syst OTH | CCCLXXV / CCLVI macht er das milz kleine                                                                                                                                               |
|                            |              |       |      |            |          | bekompt er wol dem langwenigen husten, zerteylet den zaehen                                                                                                                            |
| <i>Raphanus sativus</i> L. | Brassicaceae | ren   | LF   | Rettich    | svst RES | CCCLXXV / CCLVI schleim                                                                                                                                                                |
| <i>Raphanus sativus</i> L. | Brassicaceae | ren   | LF   | Rettich    | svst URO | CCCLXXV / CCLVI und treibt den harn                                                                                                                                                    |
| <i>Raphanus sativus</i> L. | Brassicaceae | ren   | LF   | Rettich    | svst URO | CCCLXXV / CCLVI zermalt den stein unnd treibt denselben aus                                                                                                                            |
| <i>Raphanus sativus</i> L. | Brassicaceae | s pop | UB   | Rettich    | syst GAS | p. 184 Gallenstörungen                                                                                                                                                                 |
| <i>Raphanus sativus</i> L. | Brassicaceae | s pop | UB   | Rettich    | syst GAS | p. 184 Gallenstörungen                                                                                                                                                                 |
| <i>Raphanus sativus</i> L. | Brassicaceae | s pop | UB   | Rettich    | syst RES | p. 219 Katarrhe der Atemwege                                                                                                                                                           |
| <i>Rosa</i> sp.            | Rosaceae     | ant   | DIOS | Rosen      | svst ANT | 101 bei Fluss des Zahnfleisches                                                                                                                                                        |
|                            |              |       |      |            |          | auch werden sie den kräftigend und wundenheilenden Gegenmitteln                                                                                                                        |
| <i>Rosa</i> sp.            | Rosaceae     | ant   | DIOS | Rosen      | svst ANT | 101 zugesetzt                                                                                                                                                                          |
|                            |              |       |      |            |          | ist ein Nahrnittel für hohle Geschwüre und besänftigt die                                                                                                                              |
| <i>Rosa</i> sp.            | Rosaceae     | ant   | DIOS | Rose       | top DER  | bösartigen, es ist ein Mittel gegen Schorf und Ausschlag; gegen                                                                                                                        |
| <i>Rosa</i> sp.            | Rosaceae     | ant   | DIOS | Rosen      | top DER  | 82 Verhärtungen der Augenlider                                                                                                                                                         |
| <i>Rosa</i> sp.            | Rosaceae     | ant   | DIOS | Rosen      | top DER  | 101 Zahnfleisch-, After- [d.h. Mastdarm]                                                                                                                                               |
| <i>Rosa</i> sp.            | Rosaceae     | ant   | DIOS | Rosen      | top DER  | 101 roseartige Hautentzündungen                                                                                                                                                        |
|                            |              |       |      |            |          | trocken aber und fein gerieben werden sie auf die innere Seite der                                                                                                                     |
| <i>Rosa</i> sp.            | Rosaceae     | ant   | DIOS | Rosen      | top DER  | 101 Hüften gestreut                                                                                                                                                                    |
| <i>Rosa</i> sp.            | Rosaceae     | ant   | DIOS | Rosen      | top EAR  | 101 Ohren-                                                                                                                                                                             |
| <i>Rosa</i> sp.            | Rosaceae     | ant   | DIOS | Rosen      | top EYE  | 101 um die Augen zu verschönern                                                                                                                                                        |
| <i>Rosa</i> sp.            | Rosaceae     | ant   | DIOS | Rosen      | top EYE  | 101 zum Einsalben der Augen                                                                                                                                                            |
| <i>Rosa</i> sp.            | Rosaceae     | ant   | DIOS | Rosen      | top EYE  | 101 tut gut bei Kopfschmerzen                                                                                                                                                          |
| <i>Rosa</i> sp.            | Rosaceae     | ant   | DIOS | Rosen      | top EYE  | 101 bei Augenschmerzen                                                                                                                                                                 |
| <i>Rosa</i> sp.            | Rosaceae     | ant   | DIOS | Rose       | svst GAS | 82 Leib und mildert die Hitze des Magens                                                                                                                                               |
| <i>Rosa</i> sp.            | Rosaceae     | ant   | DIOS | Rose       | top GAS  | 82 als Spülung gegen Zahnschmerzen                                                                                                                                                     |
| <i>Rosa</i> sp.            | Rosaceae     | ant   | DIOS | Hundsrose  | svst GAS | 99 stellt den Bauchfluss                                                                                                                                                               |
| <i>Rosa</i> sp.            | Rosaceae     | ant   | DIOS | Rosen      | svst GAS | 101 Bauchfluss und das Blutspeien auf                                                                                                                                                  |
| <i>Rosa</i> sp.            | Rosaceae     | ant   | DIOS | Rosen      | top GAS  | 101 Magenfaule                                                                                                                                                                         |
|                            |              |       |      |            |          | ist als Klyster mit Erfolg zu gebrauchen gegen Reize der Eingeweide                                                                                                                    |
| <i>Rosa</i> sp.            | Rosaceae     | ant   | DIOS | Rose       | top GYN  | 82 und der Gebärmutter                                                                                                                                                                 |
| <i>Rosa</i> sp.            | Rosaceae     | ant   | DIOS | Rosen      | top GYN  | 101 Mutterschmerzen                                                                                                                                                                    |
| <i>Rosa</i> sp.            | Rosaceae     | ant   | DIOS | Rosen      | top NER  | 101 heilt alle Unterentzündungen                                                                                                                                                       |
| <i>Rosa</i> sp.            | Rosaceae     | ant   | DIOS | Rose       | top NER  | 82 Anfang der Umstände gegen Kopfschmerzen                                                                                                                                             |
|                            |              |       |      |            |          | der wasche oft seinen Kopf damit, und er wird dann gesund und                                                                                                                          |
| <i>Rosa</i> sp.            | Rosaceae     | mon   | HvB  | Hagrose    | top DER  | 3-52 stark                                                                                                                                                                             |
| <i>Rosa</i> sp.            | Rosaceae     | mon   | HvB  | Hagrose    | svst GAS | 3-52 und nur einen schwachen Magen hat                                                                                                                                                 |
| <i>Rosa</i> sp.            | Rosaceae     | mon   | HvB  | Rose       | top NER  | 1-22 jähzornig                                                                                                                                                                         |
| <i>Rosa</i> sp.            | Rosaceae     | mon   | HvB  | Hagrose    | syst RES | 3-52 und wer in der Lunge leidet                                                                                                                                                       |
| <i>Rosa</i> sp.            | Rosaceae     | mon   | HvB  | Rose       | top SKE  | 1-22 Krampf, Lähmung                                                                                                                                                                   |
| <i>Rosa</i> sp.            | Rosaceae     | mon   | MF   | Rose       | top DER  | 21 Krankheiten des Mundes                                                                                                                                                              |
|                            |              |       |      |            |          | reinigt es eiternde Verletzungen und füllt klaffende Wunden, hilft                                                                                                                     |
| <i>Rosa</i> sp.            | Rosaceae     | mon   | MF   | Rose       | top DER  | 21 auch bei Brandwunden                                                                                                                                                                |
| <i>Rosa</i> sp.            | Rosaceae     | mon   | MF   | Rose       | top DER  | 21 beseitigt Darmjucken                                                                                                                                                                |
| <i>Rosa</i> sp.            | Rosaceae     | mon   | MF   | Rose       | top EYE  | 21 Augenlider erweichen                                                                                                                                                                |
| <i>Rosa</i> sp.            | Rosaceae     | mon   | MF   | Rose       | n.d. GAS | 21 Erhitzung im Magen, mindert Durchfall                                                                                                                                               |
| <i>Rosa</i> sp.            | Rosaceae     | mon   | MF   | Rose       | syst GAS | 21 erweicht es den harten Leib und tilgt grosse Hitze des Magens                                                                                                                       |
| <i>Rosa</i> sp.            | Rosaceae     | mon   | MF   | Rose       | n.d. GYN | 21 mindert sie Ausfluss der Gebärmutter                                                                                                                                                |
| <i>Rosa</i> sp.            | Rosaceae     | mon   | MF   | Rose       | top GYN  | 21 kommt auch Krankheitsfälen der Gebärmutter zugute                                                                                                                                   |
| <i>Rosa</i> sp.            | Rosaceae     | mon   | MF   | Rose       | top NER  | 21 Schmerzen und Hitze des Hauptes geheilt                                                                                                                                             |
| <i>Rosa</i> sp.            | Rosaceae     | mon   | MF   | Rose       | top OTH  | 21 zähmt sie Antoniusfeuer                                                                                                                                                             |
| <i>Rosa</i> sp.            | Rosaceae     | mon   | MF   | Rose       | top TEE  | 21 Zahnschmerz lindern                                                                                                                                                                 |
| <i>Rosa</i> sp.            | Rosaceae     | ren   | LF   | Rosen      | top DER  | CCCLXXIII / CCLV verhindert das einem das har nit ausfellt                                                                                                                             |
| <i>Rosa</i> sp.            | Rosaceae     | ren   | LF   | Rosen      | top OTH  | CCCLXXIII / CCLV zahnschmerz lindern                                                                                                                                                   |
| <i>Rosa</i> sp.            | Rosaceae     | ren   | LF   | Rosen      | top DER  | CCCLXXIII / CCLV weetaagen der daerm und muter                                                                                                                                         |
| <i>Rosa</i> sp.            | Rosaceae     | ren   | LF   | Rosen      | top DER  | CCCLXXIII / CCLV rotlauff                                                                                                                                                              |
| <i>Rosa</i> sp.            | Rosaceae     | ren   | LF   | Rosen      | top DER  | CCCLXXIII / CCLV in die wunden gestreut                                                                                                                                                |
| <i>Rosa</i> sp.            | Rosaceae     | ren   | LF   | Rosen      | top DER  | CCCLXXIII / CCLV feucht zanfleisch gethon trucknet dasselbige krefftiglich                                                                                                             |
| <i>Rosa</i> sp.            | Rosaceae     | ren   | LF   | Rosen      | top EAR  | CCCLXXIII / CCLV weetaagen der ohren                                                                                                                                                   |
| <i>Rosa</i> sp.            | Rosaceae     | ren   | LF   | Rosen      | top EYE  | CCCLXXIII / CCLV weetaagen der augen                                                                                                                                                   |
| <i>Rosa</i> sp.            | Rosaceae     | ren   | LF   | Rosen      | syst FEV | CCCLXXIII / CCLV gut zu den hitzigen febern                                                                                                                                            |
| <i>Rosa</i> sp.            | Rosaceae     | ren   | LF   | Rosen      | syst GAS | CCCLXXIII / CCLV stellen den bauchfluss un das blutspeien                                                                                                                              |
| <i>Rosa</i> sp.            | Rosaceae     | ren   | LF   | Rosen      | syst GAS | CCCLXXIII / CCLV krefftiget seer den magen, die leber                                                                                                                                  |
|                            |              |       |      |            |          | legen und miltern die hitz so sich umb die leber oder das miltz                                                                                                                        |
| <i>Rosa</i> sp.            | Rosaceae     | ren   | LF   | Rosen      | top GAS  | CCCLXXIII / CCLV ereyget, verzere die übergie feuchtigkeit des magens                                                                                                                  |
|                            |              |       |      |            |          | stellen die der frauen zeit in soderheyit aber den weissen fluss und                                                                                                                   |
| <i>Rosa</i> sp.            | Rosaceae     | ren   | LF   | Rosen      | syst GYN | CCCLXXIII / CCLV das blutspeien(?)                                                                                                                                                     |
| <i>Rosa</i> sp.            | Rosaceae     | ren   | LF   | Rosen      | top NER  | CCCLXXIII / CCLV weetaagen des haupt                                                                                                                                                   |
| <i>Rosa</i> sp.            | Rosaceae     | ren   | LF   | Rosen      | top NER  | CCCLXXIII / CCLV bringen den schlaef                                                                                                                                                   |
| <i>Rosa</i> sp.            | Rosaceae     | ren   | LF   | Rosen      | svst URO | CCCLXXIII / CCLV treiben den harn und den lendenstein                                                                                                                                  |
| <i>Rosa</i> sp.            | Rosaceae     | s pop | BVA  | Heckenrose | svst GYN | p. 84 stillende Mütter                                                                                                                                                                 |
| <i>Rosa</i> sp.            | Rosaceae     | s pop | BVA  | Heckenrose | syst HUM | p. 84 Blutreinigung                                                                                                                                                                    |
|                            |              |       |      |            |          | Mund- und Zahnwasser, entzündetliches, leichtblutendes                                                                                                                                 |
| <i>Rosa</i> sp.            | Rosaceae     | s pop | BVA  | Heckenrose | syst TEE | p. 84 Zahnfleisch                                                                                                                                                                      |
| <i>Rosa</i> sp.            | Rosaceae     | s pop | BVA  | Heckenrose | syst TEE | p. 84 Zahnfleischbluten                                                                                                                                                                |
| <i>Rosa</i> sp.            | Rosaceae     | s pop | BVA  | Heckenrose | syst TON | p. 84 Steigerung der Abwehrkräfte, Fieber                                                                                                                                              |
|                            |              |       |      |            |          | Nierenfunktionsschwäche, Griess- und Stienbildung in Niere und                                                                                                                         |
| <i>Rosa</i> sp.            | Rosaceae     | s pop | BVA  | Heckenrose | syst URO | p. 84 Blase                                                                                                                                                                            |
| <i>Rosa</i> sp.            | Rosaceae     | s pop | JK   | Rose       | top DER  | p. 406 Gesichtsrose                                                                                                                                                                    |

|                    |              |           |            |                    |       |        |                                                                            |                                                                                                                                                                   |
|--------------------|--------------|-----------|------------|--------------------|-------|--------|----------------------------------------------------------------------------|-------------------------------------------------------------------------------------------------------------------------------------------------------------------|
| Rosa sp.           | Rosaceae     | s pop JK  | Rose       | svst               | EAR   | p. 406 | Schmerzen der Ohren                                                        |                                                                                                                                                                   |
| Rosa sp.           | Rosaceae     | s pop JK  | Rose       | top                | EAR   | p. 406 | Schmerzen der Ohren                                                        |                                                                                                                                                                   |
| Rosa sp.           | Rosaceae     | s pop JK  | Rose       | syst               | EYE   | p. 406 | Schmerzen der Augen                                                        |                                                                                                                                                                   |
| Rosa sp.           | Rosaceae     | s pop JK  | Rose       | top                | EYE   | p. 406 | Schmerzen der Augen                                                        |                                                                                                                                                                   |
| Rosa sp.           | Rosaceae     | s pop JK  | Rose       | syst               | FEV   | p. 406 | Fieber zu brechen                                                          |                                                                                                                                                                   |
| Rosa sp.           | Rosaceae     | s pop JK  | Rose       | syst               | GAS   | p. 406 | Würmer und Durchfall                                                       |                                                                                                                                                                   |
| Rosa sp.           | Rosaceae     | s pop JK  | Rose       | syst               | GYN   | p. 406 | Schmerzen des Unterleibs                                                   |                                                                                                                                                                   |
| Rosa sp.           | Rosaceae     | s pop JK  | Rose       | top                | GYN   | p. 406 | Schmerzen des Unterleibs                                                   |                                                                                                                                                                   |
| Rosa sp.           | Rosaceae     | s pop JK  | Hundsrose  | syst               | GYN   | p. 366 | Unterleibstockungen                                                        |                                                                                                                                                                   |
| Rosa sp.           | Rosaceae     | s pop JK  | Hundsrose  | syst               | GYN   | p. 366 | Unterleibstockungen                                                        |                                                                                                                                                                   |
| Rosa sp.           | Rosaceae     | s pop JK  | Hundsrose  | syst               | n.d.  | p. 366 | Brust- und Seitenstechen und inneren Brand                                 |                                                                                                                                                                   |
| Rosa sp.           | Rosaceae     | s pop JK  | Hundsrose  | syst               | n.d.  | p. 366 | Brust- und Seitenstechen und inneren Brand                                 |                                                                                                                                                                   |
| Rosa sp.           | Rosaceae     | s pop JK  | Rose       | syst               | NER   | p. 406 | Nerven zu stärken                                                          |                                                                                                                                                                   |
| Rosa sp.           | Rosaceae     | s pop JK  | Hundsrose  | syst               | SKE   | p. 366 | Rheumatismus, Gicht und Ischias                                            |                                                                                                                                                                   |
| Rosa sp.           | Rosaceae     | s pop JK  | Rose       | syst               | TEE   | p. 406 | Schmerzen der Zähne                                                        |                                                                                                                                                                   |
| Rosa sp.           | Rosaceae     | s pop JK  | Rose       | syst               | URO   | p. 406 | fördert den Urinabgang                                                     |                                                                                                                                                                   |
| Rosa sp.           | Rosaceae     | s pop JK  | Hundsrose  | syst               | URO   | p. 366 | Nieren- und Blasenleiden                                                   |                                                                                                                                                                   |
| Rosa sp.           | Rosaceae     | s pop JK  | Hundsrose  | syst               | URO   | p. 366 | Nieren- und Blasenleiden                                                   |                                                                                                                                                                   |
| Rosa sp.           | Rosaceae     | s pop JK  | Hundsrose  | syst               | URO   | p. 366 | Wassersucht                                                                |                                                                                                                                                                   |
| Rosa sp.           | Rosaceae     | s pop KN  | Hundsrose  | syst               | URO   | p. 468 | Gries oder an Nieren- und Blasensteinen                                    |                                                                                                                                                                   |
| Rosa sp.           | Rosaceae     | s pop UB  | Rose       | syst               | CAR   | p. 378 | psychogenen Herzleiden                                                     |                                                                                                                                                                   |
| Rosa sp.           | Rosaceae     | s pop WI  | Hagebutte  | syst               | GAS   | p. 503 | Volksmedizin: laxierend, Darmerkrankungen usw.                             |                                                                                                                                                                   |
| Rosa sp.           | Rosaceae     | s pop WI  | Hagebutte  | syst               | URO   | p. 503 | Volksmedizin: diuretisch                                                   |                                                                                                                                                                   |
| Rosa sp.           | Rosaceae     | s pop WI  | Hagebutte  | syst               | URO   | p. 503 | Volksmedizin: Diuretikum bei Nieren- und Blasenkrankungen, bei Steinleiden |                                                                                                                                                                   |
| Rosa sp.           | Rosaceae     | sci       | EMA        | Rose               | top   | DER    | /IMPC/137299/2013                                                          | Traditional herbal medicinal product used for mild inflammations of the oral and pharyngeal mucosa.                                                               |
| Rosa sp.           | Rosaceae     | sci       | EMA        | Rose               | top   | DER    | /IMPC/137299/2013                                                          | Traditional herbal medicinal product used for relief of minor skin inflammation.                                                                                  |
| Rosa sp.           | Rosaceae     | sci       | ESCOP      | Rosae pseudo-fruct | syst  | RES    | II p. 217                                                                  | as a supplement in the treatment of colds and chills                                                                                                              |
| Rosa sp.           | Rosaceae     | sci       | ESCOP      | Rosae pseudo-fruct | syst  | SKE    | II p. 217                                                                  | Adjutant for the alleviation if pain and joint stiffness associated with osteoarthritis.                                                                          |
| Rosa sp.           | Rosaceae     | sci       | WI         | Hagebutte          | syst  | OTH    | p. 503                                                                     | Geschmacksstörungen                                                                                                                                               |
| Rosa sp.           | Rosaceae     | sci       | WI         | Hagebutte          | syst  | RES    | p. 503                                                                     | Vorbeugung und Behandlung von Erkältungskrankheiten, grippalen Infekten                                                                                           |
| Rosa sp.           | Rosaceae     | sci       | WI         | Hagebutte          | syst  | RES    | p. 503                                                                     | Unterstützung der Therapie bei Vit. C Mangel                                                                                                                      |
| Rubia tinctorum L. | Rubiaceae    | ant       | DIOS       | Färberwaid / Krapp | syst  | ANT    | 208                                                                        | hilft gegen den Biss giftiger Thiere                                                                                                                              |
| Rubia tinctorum L. | Rubiaceae    | ant       | DIOS       | Färberwaid / Krapp | top   | DER    | 208                                                                        | heilt sie weisse Flecken                                                                                                                                          |
| Rubia tinctorum L. | Rubiaceae    | ant       | DIOS       | Färberwaid / Krapp | syst  | GAS    | 208                                                                        | bei Gelbsucht                                                                                                                                                     |
| Rubia tinctorum L. | Rubiaceae    | ant       | DIOS       | Färberwaid / Krapp | top   | GYN    | 208                                                                        | befördert die Wurzel die Menstruation und die Nachgeburt                                                                                                          |
| Rubia tinctorum L. | Rubiaceae    | ant       | DIOS       | Färberwaid / Krapp | syst  | OTH    | 208                                                                        | erweicht die Milz                                                                                                                                                 |
| Rubia tinctorum L. | Rubiaceae    | ant       | DIOS       | Färberwaid / Krapp | syst  | SKE    | 208                                                                        | Ischias und Paralyse                                                                                                                                              |
| Rubia tinctorum L. | Rubiaceae    | ant       | DIOS       | Färberwaid / Krapp | syst  | URO    | 208                                                                        | Sie treibt aber reichlichen und dicken Harn, oft ist es auch Blut ein Mensch, der in seinem Körper von irgendeiner Lähmung, von welcher Stärke sie auch sein möge |
| Rubia tinctorum L. | Rubiaceae    | mon       | HvB        | Färberwaid         | top   | NER    | 1-208                                                                      | CLV / CVVII denen so von giftigen thier gebissen sind                                                                                                             |
| Rubia tinctorum L. | Rubiaceae    | ren       | LF         | Färberröte         | syst  | ANT    | CLV / CVVII                                                                | denen so von giftigen thier gebissen sind                                                                                                                         |
| Rubia tinctorum L. | Rubiaceae    | ren       | LF         | Färberröte         | syst  | ANT    | CLV / CVVII                                                                | heylet sie allerley maeler und flecken der haut als sind die flechten und zittermaeler                                                                            |
| Rubia tinctorum L. | Rubiaceae    | ren       | LF         | Färberröte         | top   | DER    | CLV / CVVII                                                                | reyniget die leber, milz, nieren unnd mutter. Ist ein koestlich tranck zu der geelsucht                                                                           |
| Rubia tinctorum L. | Rubiaceae    | ren       | LF         | Färberröte         | syst  | GAS    | CLV / CVVII                                                                | bringt sie den frauen ihre krankheit                                                                                                                              |
| Rubia tinctorum L. | Rubiaceae    | ren       | LF         | Färberröte         | syst  | GYN    | CLV / CVVII                                                                | bringt sie den frauen ihre krankheit und zeucht heraus das nachbördlin und die todtten geburt                                                                     |
| Rubia tinctorum L. | Rubiaceae    | ren       | LF         | Färberröte         | top   | GYN    | CLV / CVVII                                                                | CLV / CVVII macht das milz klein                                                                                                                                  |
| Rubia tinctorum L. | Rubiaceae    | ren       | LF         | Färberröte         | syst  | OTH    | CLV / CVVII                                                                | CLV / CVVII wol den huftsüchtigen unnd denen so lam in gldern sind                                                                                                |
| Rubia tinctorum L. | Rubiaceae    | ren       | LF         | Färberröte         | syst  | SKE    | CLV / CVVII                                                                | CLV / CVVII wol den huftsüchtigen unnd denen so lam in gldern sind                                                                                                |
| Rubia tinctorum L. | Rubiaceae    | ren       | LF         | Färberröte         | top   | SKE    | CLV / CVVII                                                                | treibt den groben harn vielfeltig und mit gewalt also das auch zu zeiten das blut hernach geet                                                                    |
| Rubia tinctorum L. | Rubiaceae    | ren       | LF         | Färberröte         | syst  | URO    | CLV / CVVII                                                                | p. 272 insufficience biliaire, constipation,                                                                                                                      |
| Rubia tinctorum L. | Rubiaceae    | s pop VAL | Färberröte | syst               | GAS   | p. 272 | oliguries, excès d'urée, lithiase urinaire                                 |                                                                                                                                                                   |
| Rubia tinctorum L. | Rubiaceae    | s pop VAL | Färberröte | syst               | URO   | p. 272 |                                                                            |                                                                                                                                                                   |
| Rubus idaeus L.    | Rosaceae     | ant       | DIOS       | Himbeere           | top   | CAR    | 221                                                                        | bei [Magen-] und Herzkrankheiten                                                                                                                                  |
| Rubus idaeus L.    | Rosaceae     | ant       | DIOS       | Himbeere           | top   | DER    | 221                                                                        | eignet sich zu Mundmitteln                                                                                                                                        |
| Rubus idaeus L.    | Rosaceae     | ant       | DIOS       | Himbeere           | top   | DER    | 221                                                                        | kräftigen das Zahnfleisch und heilen Soor.                                                                                                                        |
| Rubus idaeus L.    | Rosaceae     | ant       | DIOS       | Himbeere           | top   | DER    | 221                                                                        | halten die Blätter als Umschlag kriechende Geschwüre auf und heilen Kopfgrind, das Vorfallen der Augen, Feigwarzen und Hämorrhoiden                               |
| Rubus idaeus L.    | Rosaceae     | ant       | DIOS       | Himbeere           | top   | DER    | 221                                                                        | Augenentzündungen                                                                                                                                                 |
| Rubus idaeus L.    | Rosaceae     | ant       | DIOS       | Himbeere           | top   | EYE    | 221                                                                        | und lindert roseartige Entzündungen                                                                                                                               |
| Rubus idaeus L.    | Rosaceae     | ant       | DIOS       | Himbeere           | syst  | GAS    | 221                                                                        | Magenleiden                                                                                                                                                       |
| Rubus idaeus L.    | Rosaceae     | ant       | DIOS       | Himbeere           | syst  | GAS    | 221                                                                        | nicht ganz ausgereifte Frucht stellt genossen den Bauch                                                                                                           |
| Rubus idaeus L.    | Rosaceae     | ant       | DIOS       | Himbeere           | top   | GAS    | 221                                                                        | bei Magen- [und Herzkrankheiten]                                                                                                                                  |
| Rubus idaeus L.    | Rosaceae     | ant       | DIOS       | Himbeere           | syst  | GAS    | 221                                                                        | stellt den Bauch                                                                                                                                                  |
| Rubus idaeus L.    | Rosaceae     | ant       | DIOS       | Himbeere           | syst  | GYN    | 221                                                                        | und hält den Fluss der Frauen auf                                                                                                                                 |
| Rubus idaeus L.    | Rosaceae     | ant       | DIOS       | Himbeere           | syst  | n.d.   | 221                                                                        | heilt auch den Biss des Prester                                                                                                                                   |
| Rubus idaeus L.    | Rosaceae     | mon       | LO         | Himbeere           | syst  | OTH    | n.d.                                                                       | n.d.                                                                                                                                                              |
| Rubus idaeus L.    | Rosaceae     | ren       | LON        | Himbeere           | top   | DER    | n.d.                                                                       | Mundgeschwür                                                                                                                                                      |
| Rubus idaeus L.    | Rosaceae     | ren       | LON        | Himbeere           | syst  | GAS    | n.d.                                                                       | rote rhur, bauchfluss                                                                                                                                             |
| Rubus idaeus L.    | Rosaceae     | s pop JK  | Himbeere   | syst               | FEV   | p. 372 | innere Hitze mit Fieber                                                    |                                                                                                                                                                   |
| Rubus idaeus L.    | Rosaceae     | s pop JK  | Himbeere   | syst               | RES   | p. 372 | Lungenentzündung, Brustentzündung, Grippe                                  |                                                                                                                                                                   |
| Rubus idaeus L.    | Rosaceae     | s pop WI  | Himbeere   | top                | DER   | p. 512 | Rachenraum, bei chronischen Hauterkrankungen                               |                                                                                                                                                                   |
| Rubus idaeus L.    | Rosaceae     | s pop WI  | Himbeere   | syst               | GAS   | p. 512 | Volksmedizin: Antidiarrhikum                                               |                                                                                                                                                                   |
| Rubus idaeus L.    | Rosaceae     | s pop WI  | Himbeere   | svst               | GYN   | p. 512 | Volksmedizin: "Gynäkologikum"                                              |                                                                                                                                                                   |
| Rubus idaeus L.    | Rosaceae     | sci       | EMA        | Himbeere           | top   | DER    | /HMPC/44211/2012                                                           | Traditional herbal medicinal product for the symptomatic treatment of mild inflammation in the mouth or throat.                                                   |
| Rubus idaeus L.    | Rosaceae     | sci       | EMA        | Himbeere           | syst  | GAS    | /HMPC/44211/2012                                                           | Traditional herbal medicinal product for the symptomatic treatment of mild diarrhoea.                                                                             |
| Rubus idaeus L.    | Rosaceae     | sci       | EMA        | Himbeere           | syst  | GYN    | /HMPC/44211/2012                                                           | Traditional herbal medicinal product for the symptomatic relief of minor spasm associated with menstrual periods.                                                 |
| Rumex spp.         | Polygonaceae | ant       | DIOS       | Amperfer           | syst  | ANT    | 143                                                                        | gegen Skorpionstich getrunken                                                                                                                                     |
| Rumex spp.         | Polygonaceae | ant       | DIOS       | Amperfer           | syst  | ANT    | 143                                                                        | helfen gegen den Bisse des Skorpions                                                                                                                              |
| Rumex spp.         | Polygonaceae | ant       | DIOS       | Amperfer           | syst  | APO    | 143                                                                        | ihn vorher nimmt, hat er vom Stich nichts zu fürchten                                                                                                             |
| Rumex spp.         | Polygonaceae | ant       | DIOS       | Amperfer           | other | APO    | 143                                                                        | Wurzeln auch als Amulett gegen Drüsen an, indem sie dieselben um den Hals binden                                                                                  |
| Rumex spp.         | Polygonaceae | ant       | DIOS       | Amperfer           | top   | DER    | 143                                                                        | zerteilt er bösen Kopfausschlag                                                                                                                                   |
| Rumex spp.         | Polygonaceae | ant       | DIOS       | Amperfer           | top   | DER    | 143                                                                        | heilen Aussatz, Flechten und schuppige Nägel                                                                                                                      |
| Rumex spp.         | Polygonaceae | ant       | DIOS       | Amperfer           | top   | DER    | 143                                                                        | Zusatz zum Bade beruhigt auch das Jucken                                                                                                                          |
| Rumex spp.         | Polygonaceae | ant       | DIOS       | Amperfer           | top   | DER    | 143                                                                        | sie zerteilen Drüsen am Halse und neben den Ohren als Umschlag                                                                                                    |
| Rumex spp.         | Polygonaceae | ant       | DIOS       | Amperfer           | top   | EAR    | 143                                                                        | als Mundwasser Ohren- (und Zahnschmerzen)                                                                                                                         |
| Rumex spp.         | Polygonaceae | ant       | DIOS       | Amperfer           | syst  | GAS    | 143                                                                        | Das von allen gekochte Gemüse erweicht den Bauch gegen Dysenterie, krankhafte Verdauungszustände, Übelkeit aus dem Magen                                          |
| Rumex spp.         | Polygonaceae | ant       | DIOS       | Amperfer           | syst  | GAS    | 143                                                                        | volständig die Galt- sucht                                                                                                                                        |
| Rumex spp.         | Polygonaceae | ant       | DIOS       | Amperfer           | syst  | GYN    | 143                                                                        | befördern die Menstruation                                                                                                                                        |
| Rumex spp.         | Polygonaceae | ant       | DIOS       | Amperfer           | top   | GYN    | 143                                                                        | stellen sie den Fluss der Frauen                                                                                                                                  |
| Rumex spp.         | Polygonaceae | ant       | DIOS       | Amperfer           | top   | OTH    | 143                                                                        | wenn mit Essig (sind sie gut für) die Milz                                                                                                                        |
| Rumex spp.         | Polygonaceae | ant       | DIOS       | Amperfer           | top   | TEE    | 143                                                                        | als Mundwasser (Ohren-) und Zahnschmerzen                                                                                                                         |
| Rumex spp.         | Polygonaceae | ant       | DIOS       | Amperfer           | syst  | URO    | 143                                                                        | zertrümmern den Stein in der Blase                                                                                                                                |
| Rumex spp.         | Polygonaceae | mon       | LO         | Amperfer           | n.d.  | OTH    | n.d.                                                                       | n.d.                                                                                                                                                              |
| Rumex spp.         | Polygonaceae | mon       | MF         | Amperfer           | top   | DER    | 63                                                                         | beissendes Jucken wie auch die Krätze                                                                                                                             |
| Rumex spp.         | Polygonaceae | mon       | MF         | Amperfer           | top   | DER    | 63                                                                         | beruhigt das geschwollene Rachenröpfchen                                                                                                                          |
| Rumex spp.         | Polygonaceae | mon       | MF         | Amperfer           | top   | DER    | 63                                                                         | böse Halsdrüsen wie auch Mumpf                                                                                                                                    |



|                           |              |       |      |             |       |     |                     |                                                                       |
|---------------------------|--------------|-------|------|-------------|-------|-----|---------------------|-----------------------------------------------------------------------|
| <i>Rumex spp.</i>         | Polygonaceae | mon   | MF   | Ampfel      | top   | EAR | 63                  | vertreibt den Ohrenscherz                                             |
| <i>Rumex spp.</i>         | Polygonaceae | mon   | MF   | Ampfel      | svst  | GAS | 63                  | stärkt S.A. den Magen und pflucht auch Windblähungen                  |
| <i>Rumex spp.</i>         | Polygonaceae | mon   | MF   | Ampfel      | syst  | GAS | 63                  | Blutstuhl und Bauchgrimmen                                            |
| <i>Rumex spp.</i>         | Polygonaceae | mon   | MF   | Ampfel      | syst  | GAS | 63                  | ebenso holt sie den Gelbsichtigen                                     |
| <i>Rumex spp.</i>         | Polygonaceae | mon   | MF   | Ampfel      | syst  | GYN | 63                  | bezaht den Monatsfluss                                                |
| <i>Rumex spp.</i>         | Polygonaceae | mon   | MF   | Ampfel      | other | OTH | 63                  | Die Wurzel um den Hals gehängt, soll böse Halsdrüsen schon am         |
| <i>Rumex spp.</i>         | Polygonaceae | mon   | MF   | Ampfel      | top   | OTH | 63                  | Entstehen hindern                                                     |
| <i>Rumex spp.</i>         | Polygonaceae | mon   | MF   | Ampfel      | top   | OTH | 63                  | geschwollenen Milz                                                    |
| <i>Rumex spp.</i>         | Polygonaceae | mon   | MF   | Ampfel      | top   | TEE | 63                  | beruhigt (das geschwollene Rachenzäpfchen) und den Zahnschmerz        |
| <i>Rumex spp.</i>         | Polygonaceae | mon   | MF   | Ampfel      | syst  | URO | 63                  | treibt auch Steine aus                                                |
| <i>Rumex spp.</i>         | Polygonaceae | ren   | LF   | Sauerampfer | syst  | ANT | IX - CCLXII / CLXXV | ist gut denen so von einem scorpion gestochen sind                    |
| <i>Rumex spp.</i>         | Polygonaceae | ren   | LF   | Sauerampfer | top   | DER | IX - CCLXII / CLXXV | verwzieren sie due geschwulst                                         |
| <i>Rumex spp.</i>         | Polygonaceae | ren   | LF   | Sauerampfer | syst  | GAS | IX - CCLXII / CLXXV | machen ein linden bauch un stulgang                                   |
| <i>Rumex spp.</i>         | Polygonaceae | ren   | LF   | Sauerampfer | syst  | GAS | IX - CCLXII / CLXXV | heylet die roten rhur, stellet den bauchfluss, das grawen             |
| <i>Rumex spp.</i>         | Polygonaceae | ren   | LF   | Sauerampfer | syst  | OTH | IX - CCLXII / CLXXV | wan einer solchen tranck zuvor nimpt ist er sicher das im solches     |
| <i>Rumex spp.</i>         | Polygonaceae | ren   | LF   | Sauerampfer | syst  | OTH | IX - CCLXII / CLXXV | stechen nit schadet                                                   |
| <i>Rumex spp.</i>         | Polygonaceae | s pop | VAL  | Ampfel      | syst  | DER | p. 405              | dermatose (dartres, eczema, teigne)                                   |
| <i>Rumex spp.</i>         | Polygonaceae | s pop | VAL  | Ampfel      | top   | DER | p. 405              | dermatose (dartres, eczema, teigne)                                   |
| <i>Rumex spp.</i>         | Polygonaceae | s pop | VAL  | Ampfel      | syst  | GAS | p. 405              | hepatisme                                                             |
| <i>Rumex spp.</i>         | Polygonaceae | s pop | VAL  | Ampfel      | top   | GYN | p. 405              | leucorrhoe                                                            |
| <i>Rumex spp.</i>         | Polygonaceae | s pop | VAL  | Ampfel      | syst  | OTH | p. 405              | anemies, chlorose, diabete                                            |
| <i>Rumex spp.</i>         | Polygonaceae | s pop | VAL  | Ampfel      | syst  | SKE | p. 405              | thumatisme chronique                                                  |
| <i>Ruta graveolens</i> L. | Rutaceae     | ant   | DIOS | Raute       | syst  | ANT | 180                 | ein Gegenmittel gegen Gifte                                           |
| <i>Ruta graveolens</i> L. | Rutaceae     | ant   | DIOS | Raute       | top   | DER | 180                 | heilt er roseartige Entzündungen, kriechende Geschwüre und bösen      |
| <i>Ruta graveolens</i> L. | Rutaceae     | ant   | DIOS | Raute       | top   | DER | 180                 | Grind                                                                 |
| <i>Ruta graveolens</i> L. | Rutaceae     | ant   | DIOS | Raute       | top   | DER | 180                 | aufgestrichen bessert es Flechten                                     |
| <i>Ruta graveolens</i> L. | Rutaceae     | ant   | DIOS | Raute       | top   | DER | 180                 | denselben Mitteln entfernt es im Umschlag Feigwarzen und              |
| <i>Ruta graveolens</i> L. | Rutaceae     | ant   | DIOS | Raute       | top   | DER | 180                 | gewöhnliche Warzen                                                    |
| <i>Ruta graveolens</i> L. | Rutaceae     | ant   | DIOS | Raute       | top   | DER | 180                 | als Pulver eingeführt stillt es Nasenbluten                           |
| <i>Ruta graveolens</i> L. | Rutaceae     | ant   | DIOS | Raute       | top   | DER | 180                 | Hodenentzündungen                                                     |
| <i>Ruta graveolens</i> L. | Rutaceae     | ant   | DIOS | Raute       | top   | DER | 180                 | Hautausschlag mit Myrtenwachsöl                                       |
| <i>Ruta graveolens</i> L. | Rutaceae     | ant   | DIOS | Raute       | top   | DER | 180                 | heilt es die weiße Ventilgo, und mit denselben Mitteln entfernt es im |
| <i>Ruta graveolens</i> L. | Rutaceae     | ant   | DIOS | Raute       | top   | DER | 180                 | Umschlag Feigwarzen und gewöhnliche Warzen                            |
| <i>Ruta graveolens</i> L. | Rutaceae     | ant   | DIOS | Raute       | top   | EAR | 180                 | Mittel bei Ohrenscherzen                                              |
| <i>Ruta graveolens</i> L. | Rutaceae     | ant   | DIOS | Raute       | top   | EYE | 180                 | Schärfe des Gesichts                                                  |
| <i>Ruta graveolens</i> L. | Rutaceae     | ant   | DIOS | Raute       | top   | EYE | 180                 | mit schrauben im Katarasma lindert es heftige Augenschmerzen          |
| <i>Ruta graveolens</i> L. | Rutaceae     | ant   | DIOS | Raute       | top   | EYE | 180                 | Stumpfsichtigkeit                                                     |
| <i>Ruta graveolens</i> L. | Rutaceae     | ant   | DIOS | Raute       | syst  | FEV | 180                 | gegen                                                                 |
| <i>Ruta graveolens</i> L. | Rutaceae     | ant   | DIOS | Raute       | syst  | FEV | 180                 | periodische Frostschaue                                               |
| <i>Ruta graveolens</i> L. | Rutaceae     | ant   | DIOS | Raute       | syst  | FEV | 180                 | machen tödlichen Gifte unwirksam, In derselben Weise genommen         |
| <i>Ruta graveolens</i> L. | Rutaceae     | ant   | DIOS | Raute       | syst  | FEV | 180                 | sind sie ein gutes Mittel gegen                                       |
| <i>Ruta graveolens</i> L. | Rutaceae     | ant   | DIOS | Raute       | syst  | GAS | 180                 | Schlangenbisse                                                        |
| <i>Ruta graveolens</i> L. | Rutaceae     | ant   | DIOS | Raute       | syst  | GAS | 180                 | gegessen sowohl wie getrunken stellen sie den Durchfall               |
| <i>Ruta graveolens</i> L. | Rutaceae     | ant   | DIOS | Raute       | syst  | GAS | 180                 | wirft es den Bandwurm hinaus                                          |
| <i>Ruta graveolens</i> L. | Rutaceae     | ant   | DIOS | Raute       | syst  | GAS | 180                 | Den Geruch und die Schärfe von Lauch und Zwiebeln mildert             |
| <i>Ruta graveolens</i> L. | Rutaceae     | ant   | DIOS | Raute       | syst  | GAS | 180                 | beruhigt es Leibscheiden, dann auch wirkt es gegen Seiten-            |
| <i>Ruta graveolens</i> L. | Rutaceae     | ant   | DIOS | Raute       | syst  | GAS | 180                 | ferner gegen Aufblähen des Magens, [der Gebärmutter] und des          |
| <i>Ruta graveolens</i> L. | Rutaceae     | ant   | DIOS | Raute       | top   | GAS | 180                 | Rektums mit Öl gekocht als Injektion                                  |
| <i>Ruta graveolens</i> L. | Rutaceae     | ant   | DIOS | Raute       | syst  | GYN | 180                 | vernichtet das Peganon die Leibesfrucht                               |
| <i>Ruta graveolens</i> L. | Rutaceae     | ant   | DIOS | Raute       | syst  | GYN | 180                 | ferner gegen Aufblähen [des Magens], der Gebärmutter [und des         |
| <i>Ruta graveolens</i> L. | Rutaceae     | ant   | DIOS | Raute       | syst  | GYN | 180                 | Rektums mit Öl gekocht] als Injektion                                 |
| <i>Ruta graveolens</i> L. | Rutaceae     | ant   | DIOS | Raute       | top   | GYN | 180                 | Gebärmutterkrämpfe                                                    |
| <i>Ruta graveolens</i> L. | Rutaceae     | ant   | DIOS | Raute       | top   | NER | 180                 | Rosensalbe und Essig hilft es bei Kopfschmerzen                       |
| <i>Ruta graveolens</i> L. | Rutaceae     | ant   | DIOS | Raute       | syst  | RES | 180                 | Brustschmerz, Atemnot, Husten, Brustfellentzündung                    |
| <i>Ruta graveolens</i> L. | Rutaceae     | ant   | DIOS | Raute       | syst  | SKE | 180                 | Ischias- und Gelenkschmerzen                                          |
| <i>Ruta graveolens</i> L. | Rutaceae     | ant   | DIOS | Raute       | top   | SKE | 180                 | Gelenkschmerzen                                                       |
| <i>Ruta graveolens</i> L. | Rutaceae     | ant   | DIOS | Raute       | syst  | URO | 180                 | mit Feigen gegen das unter dem Fleische gebildete Wasser              |
| <i>Ruta graveolens</i> L. | Rutaceae     | ant   | DIOS | Raute       | top   | URO | 180                 | mit Feigen gegen das unter dem Fleische gebildete Wasser              |
| <i>Ruta graveolens</i> L. | Rutaceae     | ant   | DIOS | Raute       | syst  | URO | 180                 | der den Harn nicht halten kann, und ihm wird geholfen                 |
| <i>Ruta graveolens</i> L. | Rutaceae     | mon   | HvB  | Weinraute   | top   | EYE | 1-63                | auch ein Mensch, der tiefende Augen hat,                              |
| <i>Ruta graveolens</i> L. | Rutaceae     | mon   | HvB  | Weinraute   | syst  | GAS | 1-63                | schmerzt                                                              |
| <i>Ruta graveolens</i> L. | Rutaceae     | mon   | MF   | Raute       | syst  | ANT | 7                   | widersteht man den Giften (Mithridates)                               |
| <i>Ruta graveolens</i> L. | Rutaceae     | mon   | MF   | Raute       | syst  | APH | 7                   | zähmt Liebesgier                                                      |
| <i>Ruta graveolens</i> L. | Rutaceae     | mon   | MF   | Raute       | syst  | DER | 7                   | räudige Krätze, Kopfgrundflechte, in der Nase entstehende Borken      |
| <i>Ruta graveolens</i> L. | Rutaceae     | mon   | MF   | Raute       | syst  | DER | 7                   | stilt das ausströmende Blut (Nase) sehr gut                           |
| <i>Ruta graveolens</i> L. | Rutaceae     | mon   | MF   | Raute       | top   | EAR | 7                   | vertreibt du Ohrenscherzen durch Eintraufeln                          |
| <i>Ruta graveolens</i> L. | Rutaceae     | mon   | MF   | Raute       | syst  | EYE | 7                   | macht sie trübe Augen heilsichtig                                     |
| <i>Ruta graveolens</i> L. | Rutaceae     | mon   | MF   | Raute       | syst  | EYE | 7                   | macht sie trübe Augen heilsichtig                                     |
| <i>Ruta graveolens</i> L. | Rutaceae     | mon   | MF   | Raute       | syst  | FEV | 7                   | heilt das Fieber wenn du sie grün in Öl abkocht                       |
| <i>Ruta graveolens</i> L. | Rutaceae     | mon   | MF   | Raute       | syst  | GAS | 7                   | heilt Schmerzen von Flanke, Leber, wirkt verdünnend auf die Galle,    |
| <i>Ruta graveolens</i> L. | Rutaceae     | mon   | MF   | Raute       | syst  | GAS | 7                   | erweichend auf den harten Leib, stärkt Magen                          |
| <i>Ruta graveolens</i> L. | Rutaceae     | mon   | MF   | Raute       | syst  | GAS | 7                   | nutzbringend dem Magen                                                |
| <i>Ruta graveolens</i> L. | Rutaceae     | mon   | MF   | Raute       | syst  | GAS | 7                   | stilt Bauchgrimmen                                                    |
| <i>Ruta graveolens</i> L. | Rutaceae     | mon   | MF   | Raute       | syst  | GAS | 7                   | treibt sie die Spulwürmer hinaus                                      |
| <i>Ruta graveolens</i> L. | Rutaceae     | mon   | MF   | Raute       | syst  | GYN | 7                   | hilt sie der Gebärmutter und einer Eingeweidegeschwulst               |
| <i>Ruta graveolens</i> L. | Rutaceae     | mon   | MF   | Raute       | syst  | GYN | 7                   | beseitigt sie Geschwülste in der Gebärmutter                          |
| <i>Ruta graveolens</i> L. | Rutaceae     | mon   | MF   | Raute       | syst  | GYN | 7                   | beschleunigt die Kindsgewurt, sorat für geordneten Monatsfluss        |
| <i>Ruta graveolens</i> L. | Rutaceae     | mon   | MF   | Raute       | syst  | GYN | 7                   | hilt sie der Gebärmutter und einer Eingeweidegeschwulst               |
| <i>Ruta graveolens</i> L. | Rutaceae     | mon   | MF   | Raute       | syst  | NER | 7                   | Kopfschmerzen                                                         |
| <i>Ruta graveolens</i> L. | Rutaceae     | mon   | MF   | Raute       | syst  | OTH | 7                   | Antoniusfeuer                                                         |
| <i>Ruta graveolens</i> L. | Rutaceae     | mon   | MF   | Raute       | syst  | RES | 7                   | heilt Schmerzen von Brust                                             |
| <i>Ruta graveolens</i> L. | Rutaceae     | mon   | MF   | Raute       | syst  | RES | 7                   | stilt Husten                                                          |
| <i>Ruta graveolens</i> L. | Rutaceae     | mon   | MF   | Raute       | syst  | RES | 7                   | erfreut Lunge und Brust und heilt das Rippenleiden                    |
| <i>Ruta graveolens</i> L. | Rutaceae     | mon   | MF   | Raute       | syst  | SKE | 7                   | Gichtkrampf und Hüftgicht                                             |
| <i>Ruta graveolens</i> L. | Rutaceae     | mon   | MF   | Raute       | syst  | URO | 7                   | Wassersüchtigen                                                       |
| <i>Ruta graveolens</i> L. | Rutaceae     | mon   | MF   | Raute       | syst  | URO | 7                   | heilt Schmerzen Nieren                                                |
| <i>Ruta graveolens</i> L. | Rutaceae     | mon   | MF   | Raute       | top   | URO | 7                   | geschwollene Hoden                                                    |
| <i>Ruta graveolens</i> L. | Rutaceae     | ren   | LF   | Weinraute   | syst  | ANT | CCCL / CCXXXVI      | wider die schlangen und natern                                        |
| <i>Ruta graveolens</i> L. | Rutaceae     | ren   | LF   | Weinraute   | syst  | ANT | CCCL / CCXXXVI      | gut wider die schaedlichen pfliferling                                |
| <i>Ruta graveolens</i> L. | Rutaceae     | ren   | LF   | Weinraute   | syst  | ANT | CCCL / CCXXXVI      | nützlich denen so von den scorpion, spinnen, bynen, wesüen,           |
| <i>Ruta graveolens</i> L. | Rutaceae     | ren   | LF   | Weinraute   | top   | ANT | CCCL / CCXXXVI      | hurneuss und wuetenden hunden gestochen oder gebissen sind            |
| <i>Ruta graveolens</i> L. | Rutaceae     | ren   | LF   | Weinraute   | syst  | ANT | CCCL / CCXXXVI      | gut für allerley toedlich gift                                        |
| <i>Ruta graveolens</i> L. | Rutaceae     | ren   | LF   | Weinraute   | syst  | APH | CCCL / CCXXXVI      | tilget aus den menschlichen Samen                                     |
| <i>Ruta graveolens</i> L. | Rutaceae     | ren   | LF   | Weinraute   | syst  | CAR | CCCL / CCXXXVI      | vertreibt es die geschwulst der Wassersucht                           |
| <i>Ruta graveolens</i> L. | Rutaceae     | ren   | LF   | Weinraute   | top   | CAR | CCCL / CCXXXVI      | vertreibt es die geschwulst der Wassersucht                           |
| <i>Ruta graveolens</i> L. | Rutaceae     | ren   | LF   | Weinraute   | top   | DER | CCCL / CCXXXVI      | allerley flechten und zittermaeler am leib                            |
| <i>Ruta graveolens</i> L. | Rutaceae     | ren   | LF   | Weinraute   | top   | DER | CCCL / CCXXXVI      | heylet sie allerley maeler derselbigen [haut]                         |
| <i>Ruta graveolens</i> L. | Rutaceae     | ren   | LF   | Weinraute   | top   | DER | CCCL / CCXXXVI      | das rotlauff und den fließenden grind des hauttes                     |
| <i>Ruta graveolens</i> L. | Rutaceae     | ren   | LF   | Weinraute   | top   | DER | CCCL / CCXXXVI      | stellen das bluten der nase                                           |
| <i>Ruta graveolens</i> L. | Rutaceae     | ren   | LF   | Weinraute   | top   | DER | CCCL / CCXXXVI      | so erwärmen sie der erfrorrenen alider                                |
| <i>Ruta graveolens</i> L. | Rutaceae     | ren   | LF   | Weinraute   | top   | DER | CCCL / CCXXXVI      | heylet allerley rauden grund und krowp                                |
| <i>Ruta graveolens</i> L. | Rutaceae     | ren   | LF   | Weinraute   | top   | DER | CCCL / CCXXXVI      | zerteylen sie die geschwulst [der gemecht] und lindern den            |
| <i>Ruta graveolens</i> L. | Rutaceae     | ren   | LF   | Weinraute   | top   | DER | CCCL / CCXXXVI      | schmerzen derselben                                                   |
| <i>Ruta graveolens</i> L. | Rutaceae     | ren   | LF   | Weinraute   | top   | DER | CCCL / CCXXXVI      | verzt das undergerunnen blut und allerley masen am leib               |
| <i>Ruta graveolens</i> L. | Rutaceae     | ren   | LF   | Weinraute   | top   | EAR | CCCL / CCXXXVI      | weetagen der ohren, bring das gehoer widerumb unnd vertreibt          |
| <i>Ruta graveolens</i> L. | Rutaceae     | ren   | LF   | Weinraute   | syst  | EYE | CCCL / CCXXXVI      | das sausen und klingen derselbigen                                    |
| <i>Ruta graveolens</i> L. | Rutaceae     | ren   | LF   | Weinraute   | syst  | EYE | CCCL / CCXXXVI      | scheffen das gesicht                                                  |

|                                 |            |       |      |             |       |      |                     |                                                                       |
|---------------------------------|------------|-------|------|-------------|-------|------|---------------------|-----------------------------------------------------------------------|
| <i>Ruta graveolens</i> L.       | Rutaceae   | ren   | LF   | Weinraute   | top   | EYE  | CCCL / CXXXVI       | lesen sie den weetagen der augen, macht ein klar und lauter gesicht   |
| <i>Ruta graveolens</i> L.       | Rutaceae   | ren   | LF   | Weinraute   | top   | EYE  | CCCL / CXXXVI       | macht er klare augen                                                  |
| <i>Ruta graveolens</i> L.       | Rutaceae   | ren   | LF   | Weinraute   | syst. | GAS  | CCCL / CXXXVI       | stellen den bauchfluss                                                |
| <i>Ruta graveolens</i> L.       | Rutaceae   | ren   | LF   | Weinraute   | syst. | GAS  | CCCL / CXXXVI       | milert das grimmen                                                    |
| <i>Ruta graveolens</i> L.       | Rutaceae   | ren   | LF   | Weinraute   | top   | GAS  | CCCL / CXXXVI       | grimmen und weetagen der daerm                                        |
| <i>Ruta graveolens</i> L.       | Rutaceae   | ren   | LF   | Weinraute   | top   | GAS  | CCCL / CXXXVI       | milert es die schmerzen der gleychen [würm]                           |
| <i>Ruta graveolens</i> L.       | Rutaceae   | ren   | LF   | Weinraute   | syst. | GAS  | CCCL / CXXXVI       | fuert aus allerey würm                                                |
|                                 |            |       |      |             |       |      |                     | reyniget er die frauen nach der geburt und treibt aus das bürdlin     |
| <i>Ruta graveolens</i> L.       | Rutaceae   | ren   | LF   | Weinraute   | syst. | GYN  | CCCL / CXXXVI       | und die todten frucht                                                 |
| <i>Ruta graveolens</i> L.       | Rutaceae   | ren   | LF   | Weinraute   | top   | GYN  | CCCL / CXXXVI       | verhuetet das aufsteigender muter                                     |
| <i>Ruta graveolens</i> L.       | Rutaceae   | ren   | LF   | Weinraute   | syst. | n.d. | CCCL / CXXXVI       | weetagen der seiten, brust und dergleichen                            |
| <i>Ruta graveolens</i> L.       | Rutaceae   | ren   | LF   | Weinraute   | top   | NER  | CCCL / CXXXVI       | weetagen des haupt                                                    |
|                                 |            |       |      |             |       |      |                     | so mit dem tiefen schlaaf beladen seind fürgehalten, das sie daran    |
| <i>Ruta graveolens</i> L.       | Rutaceae   | ren   | LF   | Weinraute   | vol   | NER  | CCCL / CXXXVI       | reichen mact dieselbigen widerum munder und wacker                    |
| <i>Ruta graveolens</i> L.       | Rutaceae   | ren   | LF   | Weinraute   | syst. | RES  | CCCL / CXXXVI       | schwerlich athmen und husten zu den geschwaeren der lungen            |
| <i>Ruta graveolens</i> L.       | Rutaceae   | ren   | LF   | Weinraute   | syst. | SKE  | CCCL / CXXXVI       | weetagen der hüft                                                     |
| <i>Ruta graveolens</i> L.       | Rutaceae   | ren   | LF   | Weinraute   | top   | SKE  | CCCL / CXXXVI       | heylt die zerbrochen gleyde                                           |
| <i>Ruta graveolens</i> L.       | Rutaceae   | ren   | LF   | Weinraute   | top   | URO  | CCCL / CXXXVI       | so einer nit harnen mag                                               |
| <i>Ruta graveolens</i> L.       | Rutaceae   | ren   | LF   | Weinraute   | n.d.  | URO  | CCCL / CXXXVI       | treibt den harn du bring den frauen ihre krankheit                    |
| <i>Ruta graveolens</i> L.       | Rutaceae   | s pop | JK   | Weinraute   | syst. | ANT  | p. 439              | Bisse von Schlangen, wütenden Hunden, Insektenstichen                 |
| <i>Ruta graveolens</i> L.       | Rutaceae   | s pop | JK   | Weinraute   | top   | ANT  | p. 439              | Bisse von Schlangen, wütenden Hunden, Insektenstichen                 |
| <i>Ruta graveolens</i> L.       | Rutaceae   | s pop | JK   | Weinraute   | syst. | CAR  | p. 439              | Schwindel, Herzbeklemmung                                             |
| <i>Ruta graveolens</i> L.       | Rutaceae   | s pop | JK   | Weinraute   | top   | DER  | p. 439              | Warzen                                                                |
|                                 |            |       |      |             |       |      |                     | Ohrensausen, das nicht von Herzschwäche herrührt; Ohrenkanäle,        |
| <i>Ruta graveolens</i> L.       | Rutaceae   | s pop | JK   | Weinraute   | top   | EAR  | p. 439              | die verschwollen sind                                                 |
| <i>Ruta graveolens</i> L.       | Rutaceae   | s pop | JK   | Weinraute   | vol   | EAR  | p. 439              | Schwerhörigkeit                                                       |
| <i>Ruta graveolens</i> L.       | Rutaceae   | s pop | JK   | Weinraute   | top   | EYE  | p. 439              | erhält uns stärkt die Sehkraft                                        |
| <i>Ruta graveolens</i> L.       | Rutaceae   | s pop | JK   | Weinraute   | syst. | GAS  | p. 439              | alle Arten von Würmern                                                |
| <i>Ruta graveolens</i> L.       | Rutaceae   | s pop | JK   | Weinraute   | syst. | NER  | p. 439              | Fallsucht                                                             |
| <i>Ruta graveolens</i> L.       | Rutaceae   | s pop | JK   | Weinraute   | vol   | OTH  | p. 439              | Fliegen, Wanzen, usw. Kleidermotten                                   |
|                                 |            |       |      |             |       |      |                     | Kongestion, das ist Blutandrang zum Kopfe, bei Eingonnenheit          |
| <i>Ruta graveolens</i> L.       | Rutaceae   | s pop | KN   | Weinraute   | syst. | CAR  | p. 481              | des Kopfes, Schwindel                                                 |
|                                 |            |       |      |             |       |      |                     | Kongestion, das ist Blutandrang zum Kopfe, bei Eingonnenheit          |
| <i>Ruta graveolens</i> L.       | Rutaceae   | s pop | KN   | Weinraute   | syst. | CAR  | p. 481              | des Kopfes, Schwindel                                                 |
| <i>Ruta graveolens</i> L.       | Rutaceae   | s pop | KN   | Weinraute   | syst. | GAS  | p. 481              | Verdaunungsstörungen, Blähsucht und Koliken                           |
| <i>Ruta graveolens</i> L.       | Rutaceae   | s pop | KN   | Weinraute   | syst. | GAS  | p. 481              | Verdaunungsstörungen, Blähsucht und Koliken                           |
| <i>Ruta graveolens</i> L.       | Rutaceae   | s pop | KN   | Weinraute   | syst. | GAS  | p. 481              | Verdaunungsstörungen, Blähsucht und Koliken                           |
| <i>Ruta graveolens</i> L.       | Rutaceae   | s pop | KN   | Weinraute   | syst. | GYN  | p. 481              | Unterleibsbeschwerden und -zuständen                                  |
| <i>Ruta graveolens</i> L.       | Rutaceae   | s pop | KN   | Weinraute   | syst. | GYN  | p. 481              | Unterleibsbeschwerden und -zuständen                                  |
| <i>Ruta graveolens</i> L.       | Rutaceae   | s pop | KN   | Weinraute   | syst. | GYN  | p. 481              | Unterleibsbeschwerden und -zuständen                                  |
| <i>Ruta graveolens</i> L.       | Rutaceae   | s pop | KN   | Weinraute   | syst. | RES  | p. 481              | Atmungsbeschwerden                                                    |
| <i>Ruta graveolens</i> L.       | Rutaceae   | s pop | KN   | Weinraute   | syst. | RES  | p. 481              | Atmungsbeschwerden                                                    |
| <i>Ruta graveolens</i> L.       | Rutaceae   | s pop | KN   | Weinraute   | syst. | RES  | p. 481              | Atmungsbeschwerden                                                    |
| <i>Ruta graveolens</i> L.       | Rutaceae   | s pop | UB   | Weinraute   | syst. | CAR  | p. 410              | venöse Gefässerkrankungen                                             |
| <i>Salix alba</i> aggr.         | Salicaceae | ant   | DIOS | Weide       | vol   | DER  | 103                 | sie vertreibt aber auch Kleingrind                                    |
| <i>Salix alba</i> aggr.         | Salicaceae | ant   | DIOS | Weide       | top   | DER  | 103                 | Hautverhärtungen und Schwielen                                        |
| <i>Salix alba</i> aggr.         | Salicaceae | ant   | DIOS | Weide       | top   | EAR  | 103                 | heilt mit Rosenöl zusammen Ohrenleiden                                |
| <i>Salix alba</i> aggr.         | Salicaceae | ant   | DIOS | Weide       | n.d.  | EYE  | 103                 | vertreiben, was die Pupille verdunkelt                                |
| <i>Salix alba</i> aggr.         | Salicaceae | ant   | DIOS | Weide       | syst. | GAS  | 103                 | hilft bei Blutspeien                                                  |
| <i>Salix alba</i> aggr.         | Salicaceae | ant   | DIOS | Weide       | syst. | GAS  | 103                 | hilft bei Blutspeien                                                  |
| <i>Salix alba</i> aggr.         | Salicaceae | ant   | DIOS | Weide       | syst. | GAS  | 103                 | angebracht                                                            |
| <i>Salix alba</i> aggr.         | Salicaceae | ant   | DIOS | Weide       | syst. | GYN  | 103                 | mit Wasser genommen verhindert sie die Empfängnis                     |
| <i>Salix alba</i> aggr.         | Salicaceae | ant   | DIOS | Weide       | syst. | SKE  | 103                 | mit Wasser genommen verhindert sie die Empfängnis                     |
| <i>Salix alba</i> aggr.         | Salicaceae | ant   | DIOS | Weide       | vol   | OTH  | 103                 | mit Wasser genommen verhindert sie die Empfängnis                     |
| <i>Salix alba</i> aggr.         | Salicaceae | mon   | HVB  | Weide       | syst. | OTH  | 103                 | mit Wasser genommen verhindert sie die Empfängnis                     |
| <i>Salix alba</i> aggr.         | Salicaceae | ren   | LF   | Silberweide | syst. | ANT  | XVIII - CXC / CXXVI | vertreiben den lust un newaung zur unkeuscheit                        |
| <i>Salix alba</i> aggr.         | Salicaceae | ren   | LF   | Silberweide | top   | DER  | XVIII - CXC / CXXVI | wartzen und hueneraugen                                               |
| <i>Salix alba</i> aggr.         | Salicaceae | ren   | LF   | Silberweide | top   | EAR  | XVIII - CXC / CXXVI | osenoel, granatapfel weetagen der oren                                |
| <i>Salix alba</i> aggr.         | Salicaceae | ren   | LF   | Silberweide | top   | EYE  | XVIII - CXC / CXXVI | macht lautere augen und schoen angesicht                              |
| <i>Salix alba</i> aggr.         | Salicaceae | ren   | LF   | Silberweide | n.d.  | GAS  | XVIII - CXC / CXXVI | denen so blut speien                                                  |
| <i>Salix alba</i> aggr.         | Salicaceae | ren   | LF   | Silberweide | syst. | GAS  | XVIII - CXC / CXXVI | weetagen der zarten und subtiln daerm leiden                          |
| <i>Salix alba</i> aggr.         | Salicaceae | ren   | LF   | Silberweide | n.d.  | GAS  | XVIII - CXC / CXXVI | denen so blut speien                                                  |
| <i>Salix alba</i> aggr.         | Salicaceae | ren   | LF   | Silberweide | vol   | SKE  | XVIII - CXC / CXXVI | podagram                                                              |
| <i>Salix alba</i> aggr.         | Salicaceae | s pop | BVA  | Silberweide | top   | DER  | p. 197              | Fusssschweiss, Schuppenflechte, Kopfschuppen                          |
| <i>Salix alba</i> aggr.         | Salicaceae | s pop | BVA  | Silberweide | syst. | FEV  | p. 197              | Fieber,Grippe                                                         |
| <i>Salix alba</i> aggr.         | Salicaceae | s pop | BVA  | Silberweide | syst. | GYN  | p. 197              | Menstruationsbeschwerden                                              |
| <i>Salix alba</i> aggr.         | Salicaceae | s pop | BVA  | Silberweide | syst. | NER  | p. 197              | Kopfweh, Ischias                                                      |
| <i>Salix alba</i> aggr.         | Salicaceae | s pop | BVA  | Silberweide | syst. | NER  | p. 197              | Nervenschwäche, Schlaflosigkeit, Beruhigung                           |
| <i>Salix alba</i> aggr.         | Salicaceae | s pop | BVA  | Silberweide | syst. | RES  | p. 197              | Erkältung, Katarrh, Mandeschwellung                                   |
| <i>Salix alba</i> aggr.         | Salicaceae | s pop | BVA  | Silberweide | syst. | SKE  | p. 197              | Rheuma, Gicht, Arthritis, vermehrte Harnsäureausscheidung             |
| <i>Salix alba</i> aggr.         | Salicaceae | s pop | JK   | Weiden      | top   | DER  | p. 437              | Schuppen vertreibendes Kopfwaschmittel                                |
|                                 |            |       |      |             |       |      |                     | stillen das Blut und fördern rasche und saubere Aushellen der         |
| <i>Salix alba</i> aggr.         | Salicaceae | s pop | JK   | Weiden      | top   | DER  | p. 437              | Wunde                                                                 |
| <i>Salix alba</i> aggr.         | Salicaceae | s pop | UB   | Weide       | syst. | FEV  | p. 201              | Fiebersenkend                                                         |
| <i>Salix alba</i> aggr.         | Salicaceae | s pop | UB   | Weide       | syst. | SKE  | p. 279              | Arthrose                                                              |
| <i>Salix alba</i> aggr.         | Salicaceae | sci   | EMA  | Weide       | syst. | FEV  | IMPC/295338/2007    | associated with common cold                                           |
|                                 |            |       |      |             |       |      |                     | Traditional herbal medicinal product used for the relief of: fever    |
| <i>Salix alba</i> aggr.         | Salicaceae | sci   | EMA  | Weide       | syst. | FEV  | IMPC/295338/2007    | associated with common cold                                           |
|                                 |            |       |      |             |       |      |                     | Traditional herbal medicinal product used for the relief of: fever    |
| <i>Salix alba</i> aggr.         | Salicaceae | sci   | EMA  | Weide       | syst. | FEV  | IMPC/295338/2007    | associated with common cold                                           |
|                                 |            |       |      |             |       |      |                     | Traditional herbal medicinal product used for the relief of: fever    |
| <i>Salix alba</i> aggr.         | Salicaceae | sci   | EMA  | Weide       | syst. | NER  | IMPC/295338/2007    | Traditional herbal medicinal product used for the relief of: headache |
| <i>Salix alba</i> aggr.         | Salicaceae | sci   | EMA  | Weide       | syst. | NER  | IMPC/295338/2007    | Traditional herbal medicinal product used for the relief of: headache |
| <i>Salix alba</i> aggr.         | Salicaceae | sci   | EMA  | Weide       | syst. | NER  | IMPC/295338/2007    | Traditional herbal medicinal product used for the relief of: headache |
| <i>Salix alba</i> aggr.         | Salicaceae | sci   | EMA  | Weide       | syst. | NER  | IMPC/295338/2007    | Traditional herbal medicinal product used for the relief of: headache |
| <i>Salix alba</i> aggr.         | Salicaceae | sci   | EMA  | Weide       | syst. | SKE  | IMPC/295338/2007    | articular pain                                                        |
|                                 |            |       |      |             |       |      |                     | Traditional herbal medicinal product used for the relief of: minor    |
| <i>Salix alba</i> aggr.         | Salicaceae | sci   | EMA  | Weide       | syst. | SKE  | IMPC/295338/2007    | articular pain                                                        |
|                                 |            |       |      |             |       |      |                     | Traditional herbal medicinal product used for the relief of: minor    |
| <i>Salix alba</i> aggr.         | Salicaceae | sci   | EMA  | Weide       | syst. | SKE  | IMPC/295338/2007    | articular pain                                                        |
|                                 |            |       |      |             |       |      |                     | Traditional herbal medicinal product used for the relief of: minor    |
| <i>Salix alba</i> aggr.         | Salicaceae | sci   | EMA  | Weide       | syst. | FEV  | p. 518              | leichte fieberhafte Infekte, Erkältungs- und Infektionskrankheiten    |
| <i>Salvia officinalis</i> aggr. | Lamiaceae  | ant   | DIOS | Salbei      | syst. | ANT  | 177                 | Wunden des Stechrochen zu heilen                                      |
| <i>Salvia officinalis</i> aggr. | Lamiaceae  | ant   | DIOS | Salbei      | top   | DER  | 177                 | ist ein Wund- und blutstillendes Mittel und reinigt böse Geschwüre    |
| <i>Salvia officinalis</i> aggr. | Lamiaceae  | ant   | DIOS | Salbei      | top   | DER  | 177                 | Es färbt auch das Haar schwarz                                        |
|                                 |            |       |      |             |       |      |                     | Abkochung der Blätter und Zweige als Bähmittel beruhigt das           |
| <i>Salvia officinalis</i> aggr. | Lamiaceae  | ant   | DIOS | Salbei      | vol   | DER  | 177                 | Jucken an den Geschlechtsteilen                                       |
| <i>Salvia officinalis</i> aggr. | Lamiaceae  | ant   | DIOS | Salbei      | syst. | GYN  | 177                 | die Katamenien und den Embryo hervorzu ziehen                         |
|                                 |            |       |      |             |       |      |                     | Abkochung der Blätter und Zweige als Trank hat die Kraft, den Urin    |
| <i>Salvia officinalis</i> aggr. | Lamiaceae  | ant   | DIOS | Salbei      | syst. | URO  | 177                 | zu treiben                                                            |
| <i>Salvia officinalis</i> aggr. | Lamiaceae  | mon   | HVB  | Salbei      | syst. | GAS  | 1-63                | oder wenn jemand stinkenden Atem hat                                  |
| <i>Salvia officinalis</i> aggr. | Lamiaceae  | mon   | HVB  | Salbei      | syst. | GAS  | 1-63                | Widerwillen gegen das Essen                                           |
| <i>Salvia officinalis</i> aggr. | Lamiaceae  | mon   | HVB  | Salbei      | syst. | HUM  | 1-63                | es vermindert den Überfluss der schlechten Säfte                      |
| <i>Salvia officinalis</i> aggr. | Lamiaceae  | mon   | HVB  | Salbei      | vol   | OTH  | 1-63                | und wer von irgendeiner schmutzigen Sache Gestank erleidet            |
| <i>Salvia officinalis</i> aggr. | Lamiaceae  | mon   | HVB  | Salbei      | syst. | SKE  | 1-63                | etwas an Gicht leidet, Lähmung                                        |
| <i>Salvia officinalis</i> aggr. | Lamiaceae  | mon   | MF   | Salbei      | syst. | ANT  | 24                  | heilt er giftige Bisse                                                |
| <i>Salvia officinalis</i> aggr. | Lamiaceae  | mon   | MF   | Salbei      | syst. | SKE  | 24                  | Blutfluss hemmen                                                      |
| <i>Salvia officinalis</i> aggr. | Lamiaceae  | mon   | MF   | Salbei      | top   | DER  | 24                  | Jucken der weiblichen Scham und des männlichen Gliedes                |

|                          |           |       |    |              |      |     |                      |                                                                |
|--------------------------|-----------|-------|----|--------------|------|-----|----------------------|----------------------------------------------------------------|
| Salvia officinalis aggr. | Lamiaceae | mon   | MF | Salbei       | syst | GAS | 24                   | nützt den Bechwerden der Leber.                                |
| Salvia officinalis aggr. | Lamiaceae | mon   | MF | Salbei       | syst | GYN | 24                   | treibt die Leibesfrucht ab, sorgt für geordneten Monatsfluss   |
| Salvia officinalis aggr. | Lamiaceae | mon   | MF | Salbei       | syst | RES | 24                   | belehmt er altverstockten Husten und Rippenfellschmerz         |
| Salvia officinalis aggr. | Lamiaceae | mon   | MF | Salbei       | syst | URO | 24                   | erregt den Harn                                                |
| Salvia officinalis aggr. | Lamiaceae | ren   | LF | Salbei       | top  | ANT | II - CXXXVIII / XCII | heylet die biss der giftigen thiern                            |
| Salvia officinalis aggr. | Lamiaceae | ren   | LF | Salbei       | top  | DER | II - CXXXVIII / XCII | gut zu allerley wunden, seubert dieselbe und heylet sie        |
| Salvia officinalis aggr. | Lamiaceae | ren   | LF | Salbei       | top  | DER | II - CXXXVIII / XCII | stellet das blut so aus den wunden laufft                      |
| Salvia officinalis aggr. | Lamiaceae | ren   | LF | Salbei       | top  | DER | II - CXXXVIII / XCII | vertreiben das jucken an den gemachten                         |
| Salvia officinalis aggr. | Lamiaceae | ren   | LF | Salbei       | top  | EAR | II - CXXXVIII / XCII | zeucht die wuerm aus den ohren                                 |
| Salvia officinalis aggr. | Lamiaceae | ren   | LF | Salbei       | syst | GAS | II - CXXXVIII / XCII | gut der verstopffung der leber                                 |
| Salvia officinalis aggr. | Lamiaceae | ren   | LF | Salbei       | syst | GAS | II - CXXXVIII / XCII | rote rühr                                                      |
| Salvia officinalis aggr. | Lamiaceae | ren   | LF | Salbei       | syst | GYN | II - CXXXVIII / XCII | bringen den frawen ihre zeit und treiben aus die todten frucht |
| Salvia officinalis aggr. | Lamiaceae | ren   | LF | Salbei       | top  | OTH | II - CXXXVIII / XCII | macht schwarz har                                              |
| Salvia officinalis aggr. | Lamiaceae | ren   | LF | Salbei       | syst | RES | II - CXXXVIII / XCII | vertreiben den husten un die weetagen der seiten               |
| Salvia officinalis aggr. | Lamiaceae | ren   | LF | Salbei       | syst | URO | II - CXXXVIII / XCII | treiben den harn                                               |
| Salvia officinalis aggr. | Lamiaceae | s pop | JK | Salbei       | top  | DER | p. 409               | Sänger, Kinder mit empfindlichem Hals                          |
| Salvia officinalis aggr. | Lamiaceae | s pop | JK | Salbei       | top  | DER | p. 409               | Hauterkrankungen, Haare fein und glänzend                      |
| Salvia officinalis aggr. | Lamiaceae | s pop | JK | Salbei       | top  | DER | p. 409               | Geschwüren, Ohrengeschwüre                                     |
| Salvia officinalis aggr. | Lamiaceae | s pop | JK | Salbei       | syst | FEV | p. 409               | Entwicklungsjahre und Frauen in den Wechseljahren              |
| Salvia officinalis aggr. | Lamiaceae | s pop | JK | Salbei       | syst | GAS | p. 409               | Magen, fördert den Appetit                                     |
| Salvia officinalis aggr. | Lamiaceae | s pop | JK | Salbei       | syst | GAS | p. 409               | Durchfall und Ruhr                                             |
| Salvia officinalis aggr. | Lamiaceae | s pop | JK | Salbei       | syst | GYN | p. 409               | erwartenden Frauen                                             |
| Salvia officinalis aggr. | Lamiaceae | s pop | JK | Salbei       | top  | GYN | p. 409               | stärken den Unterleib                                          |
| Salvia officinalis aggr. | Lamiaceae | s pop | JK | Salbei       | syst | NER | p. 409               | Gehirn                                                         |
| Salvia officinalis aggr. | Lamiaceae | s pop | JK | Salbei       | syst | NER | p. 409               | von Schlag gerührten Patienten                                 |
| Salvia officinalis aggr. | Lamiaceae | s pop | JK | Salbei       | top  | NER | p. 409               | nehmen das Zittern                                             |
| Salvia officinalis aggr. | Lamiaceae | s pop | JK | Salbei       | top  | OTH | p. 409               | Kopfwaschungen tötet Ungeziefer ab                             |
| Salvia officinalis aggr. | Lamiaceae | s pop | JK | Salbei       | syst | RES | p. 409               | säubert Lungen und heilt Schnupfen und Katarrh                 |
| Salvia officinalis aggr. | Lamiaceae | s pop | JK | Salbei       | vol  | RES | p. 409               | engbrüstige und keuchende Männer                               |
| Salvia officinalis aggr. | Lamiaceae | s pop | JK | Salbei       | syst | SKE | p. 409               | Gicht und inneren Krämpfen                                     |
| Salvia officinalis aggr. | Lamiaceae | s pop | JK | Salbei       | top  | SKE | p. 409               | Kinderlähmung und deren Folgen                                 |
| Salvia officinalis aggr. | Lamiaceae | s pop | JK | Salbei       | top  | TEE | p. 409               | gute, frische Zähne, überdes auch den üblen Atem behebt        |
| Salvia officinalis aggr. | Lamiaceae | s pop | JK | Salbei       | syst | TOP | p. 409               | in Zeit von ansteckenden Krankheiten                           |
| Salvia officinalis aggr. | Lamiaceae | s pop | JK | Salbei       | syst | URO | p. 409               | Nieren, Blase                                                  |
| Salvia officinalis aggr. | Lamiaceae | s pop | KN | Gartensalbei | top  | DER | p. 483               | entzündliche Veränderungen in Mund, Gaumen, Rachen,            |
| Salvia officinalis aggr. | Lamiaceae | s pop | KN | Gartensalbei | top  | DER | p. 483               | Zahnfleischblutungen und -eiterungen                           |
| Salvia officinalis aggr. | Lamiaceae | s pop | KN | Gartensalbei | syst | GAS | p. 483               | akuten und katarrhalischen Veränderungen des Verdauungstraktes |
| Salvia officinalis aggr. | Lamiaceae | s pop | KN | Gartensalbei | syst | GAS | p. 483               | akuten und katarrhalischen Veränderungen des Verdauungstraktes |
| Salvia officinalis aggr. | Lamiaceae | s pop | KN | Gartensalbei | syst | GYN | p. 483               | bei verminderter Periode                                       |
| Salvia officinalis aggr. | Lamiaceae | s pop | KN | Gartensalbei | syst | GYN | p. 483               | bei verminderter Periode                                       |
| Salvia officinalis aggr. | Lamiaceae | s pop | KN | Gartensalbei | syst | OTH | p. 483               | Fettsucht                                                      |
| Salvia officinalis aggr. | Lamiaceae | s pop | KN | Gartensalbei | syst | OTH | p. 483               | Fettsucht                                                      |
| Salvia officinalis aggr. | Lamiaceae | s pop | KN | Gartensalbei | syst | RES | p. 483               | Lungenverschleimung und Lungentuberkulose mit Nachtschweiss    |
| Salvia officinalis aggr. | Lamiaceae | s pop | KN | Gartensalbei | syst | RES | p. 483               | Lungenverschleimung und Lungentuberkulose mit Nachtschweiss    |
| Salvia officinalis aggr. | Lamiaceae | s pop | KN | Gartensalbei | syst | SKE | p. 483               | Stoffwechselstörungen; Gicht, Rheumatismus                     |
| Salvia officinalis aggr. | Lamiaceae | s pop | KN | Gartensalbei | syst | SKE | p. 483               | Stoffwechselstörungen; Gicht, Rheumatismus                     |
| Salvia officinalis aggr. | Lamiaceae | s pop | KN | Gartensalbei | syst | URO | p. 483               | Nierenausscheidung wird vermehrt                               |
| Salvia officinalis aggr. | Lamiaceae | s pop | KN | Gartensalbei | syst | URO | p. 483               | Nierenausscheidung wird vermehrt                               |
| Salvia officinalis aggr. | Lamiaceae | s pop | UB | Salbei       | top  | DER | p. 361               | übermässiges Schwitzen                                         |
| Salvia officinalis aggr. | Lamiaceae | s pop | UB | Salbei       | syst | GAS | p. 157               | Amara aromatica, Magenkrankungen, Gallenstörungen              |
| Salvia officinalis aggr. | Lamiaceae | s pop | UB | Salbei       | syst | GAS | p. 157               | Amara aromatica, Magenkrankungen,                              |

Dal Cero M., Saller R., Leonti M., Weckerle C.S.



|                                                                                 |       |      |                     |      |     |                     |                                                                                                                                                                                                                                                            |
|---------------------------------------------------------------------------------|-------|------|---------------------|------|-----|---------------------|------------------------------------------------------------------------------------------------------------------------------------------------------------------------------------------------------------------------------------------------------------|
| <i>Sinapis</i> spp. ( <i>Sinapis alba</i> , <i>Brassica nigra</i> Brassicaceae) | ant   | DIOS | Weisser Senf        | top  | NER | 153                 | Mit Feigen gemischt und bis zur Röte (der Haut) aufgelegt ist er ein gutes Mittel bei [Ischias- und Milzschmerzen] und überhaupt gegen jeden andauernden Schmerz, wo wir nach Art der einseitigen Leiden es aus der Tiefe an die Oberfläche ziehen wollen. |
| <i>Sinapis</i> spp. ( <i>Sinapis alba</i> , <i>Brassica nigra</i> Brassicaceae) | ant   | DIOS | Weisser Senf        | top  | OTH | 153                 | Mit Feigen gemischt und bis zur Röte (der Haut) aufgelegt ist er ein gutes Mittel bei [Ischias- und Milzschmerzen] und überhaupt gegen jeden andauernden Schmerz, wo wir nach Art der einseitigen Leiden es aus der Tiefe an die Oberfläche ziehen wollen. |
| <i>Sinapis</i> spp. ( <i>Sinapis alba</i> , <i>Brassica nigra</i> Brassicaceae) | ant   | DIOS | Weisser Senf        | top  | SKE | 153                 | Mit Feigen gemischt und bis zur Röte (der Haut) aufgelegt ist er ein gutes Mittel bei [Ischias- und Milzschmerzen] und überhaupt gegen jeden andauernden Schmerz, wo wir nach Art der einseitigen Leiden es aus der Tiefe an die Oberfläche ziehen wollen. |
| <i>Sinapis</i> spp. ( <i>Sinapis alba</i> , <i>Brassica nigra</i> Brassicaceae) | mon   | HvB  | Senf                | syst | EVE | 1-94                | macht er die Augen klar                                                                                                                                                                                                                                    |
| <i>Sinapis</i> spp. ( <i>Sinapis alba</i> , <i>Brassica nigra</i> Brassicaceae) | mon   | HvB  | Senf                | syst | OTH | 1-94                | so dass er eine gewisse Feuchtigkeit aus dem Kopf herauszieht                                                                                                                                                                                              |
| <i>Sinapis</i> spp. ( <i>Sinapis alba</i> , <i>Brassica nigra</i> Brassicaceae) | ren   | LF   | Senf                | n.d. | ANT | II - CCXIII / CCIII | ist gut wider das gift der pfefferlinge                                                                                                                                                                                                                    |
| <i>Sinapis</i> spp. ( <i>Sinapis alba</i> , <i>Brassica nigra</i> Brassicaceae) | ren   | LF   | Senf                | top  | DER | II - CCXIII / CCIII | verzet es das underrunnen blut                                                                                                                                                                                                                             |
| <i>Sinapis</i> spp. ( <i>Sinapis alba</i> , <i>Brassica nigra</i> Brassicaceae) | ren   | LF   | Senf                | top  | DER | II - CCXIII / CCIII | heylet es die boese rauden und die gelfechen                                                                                                                                                                                                               |
| <i>Sinapis</i> spp. ( <i>Sinapis alba</i> , <i>Brassica nigra</i> Brassicaceae) | ren   | LF   | Senf                | top  | DER | II - CCXIII / CCIII | macht es die ausgefallene har wider wachsen, macht ein hupsch                                                                                                                                                                                              |
| <i>Sinapis</i> spp. ( <i>Sinapis alba</i> , <i>Brassica nigra</i> Brassicaceae) | ren   | LF   | Senf                | top  | DER | II - CCXIII / CCIII | angesicht und vertreibt die maeler un flecken                                                                                                                                                                                                              |
| <i>Sinapis</i> spp. ( <i>Sinapis alba</i> , <i>Brassica nigra</i> Brassicaceae) | ren   | LF   | Senf                | top  | EAR | II - CCXIII / CCIII | brinat es das gehoer wider und vertreibt das sausen in ohren                                                                                                                                                                                               |
| <i>Sinapis</i> spp. ( <i>Sinapis alba</i> , <i>Brassica nigra</i> Brassicaceae) | ren   | LF   | Senf                | top  | EVE | II - CCXIII / CCIII | macht klare augen und vertreibt die reihe der augenbrawen                                                                                                                                                                                                  |
| <i>Sinapis</i> spp. ( <i>Sinapis alba</i> , <i>Brassica nigra</i> Brassicaceae) | ren   | LF   | Senf                | syst | GAS | II - CCXIII / CCIII | ist dem magen trefflich gut                                                                                                                                                                                                                                |
| <i>Sinapis</i> spp. ( <i>Sinapis alba</i> , <i>Brassica nigra</i> Brassicaceae) | ren   | LF   | Senf                | syst | GAS | II - CCXIII / CCIII | sterckt die dewung und zerteylet die groben speiss im magen /                                                                                                                                                                                              |
| <i>Sinapis</i> spp. ( <i>Sinapis alba</i> , <i>Brassica nigra</i> Brassicaceae) | ren   | LF   | Senf                | syst | GAS | II - CCXIII / CCIII | verzeret auch allerley überflüssige feuchtigkeyt des magens                                                                                                                                                                                                |
| <i>Sinapis</i> spp. ( <i>Sinapis alba</i> , <i>Brassica nigra</i> Brassicaceae) | ren   | LF   | Senf                | vol  | GYN | II - CCXIII / CCIII | wann man den frawen so due mutter über sich steigt den Senff mit essig vermengt fürhelt und daran riechen lasst so kommen sie                                                                                                                              |
| <i>Sinapis</i> spp. ( <i>Sinapis alba</i> , <i>Brassica nigra</i> Brassicaceae) | ren   | LF   | Senf                | syst | HUM | II - CCXIII / CCIII | wieder zu inen selbs                                                                                                                                                                                                                                       |
| <i>Sinapis</i> spp. ( <i>Sinapis alba</i> , <i>Brassica nigra</i> Brassicaceae) | ren   | LF   | Senf                | syst | HUM | II - CCXIII / CCIII | zeucht den zaehen schleim auss dem haupt und reynigt das hirn                                                                                                                                                                                              |
| <i>Sinapis</i> spp. ( <i>Sinapis alba</i> , <i>Brassica nigra</i> Brassicaceae) | ren   | LF   | Senf                | top  | HUM | II - CCXIII / CCIII | zeucht aus dem leib allerley feuchtigkeyt eusserlich übergelegt                                                                                                                                                                                            |
| <i>Sinapis</i> spp. ( <i>Sinapis alba</i> , <i>Brassica nigra</i> Brassicaceae) | ren   | LF   | Senf                | top  | HUM | II - CCXIII / CCIII | senffsamens gestossen in die nasen gethon macht niesen                                                                                                                                                                                                     |
| <i>Sinapis</i> spp. ( <i>Sinapis alba</i> , <i>Brassica nigra</i> Brassicaceae) | ren   | LF   | Senf                | n.d. | NER | II - CCXIII / CCIII | ist gut denen so die fallende suchte haben                                                                                                                                                                                                                 |
| <i>Sinapis</i> spp. ( <i>Sinapis alba</i> , <i>Brassica nigra</i> Brassicaceae) | ren   | LF   | Senf                | top  | NER | II - CCXIII / CCIII | ist gut denen so von dem schwaeren schlaff nit moegen erweckt                                                                                                                                                                                              |
| <i>Sinapis</i> spp. ( <i>Sinapis alba</i> , <i>Brassica nigra</i> Brassicaceae) | ren   | LF   | Senf                | top  | OTH | II - CCXIII / CCIII | werden                                                                                                                                                                                                                                                     |
| <i>Sinapis</i> spp. ( <i>Sinapis alba</i> , <i>Brassica nigra</i> Brassicaceae) | ren   | LF   | Senf                | vol  | OTH | II - CCXIII / CCIII | ist gut denen so vonn den natern oder scorpion gestochen seind                                                                                                                                                                                             |
| <i>Sinapis</i> spp. ( <i>Sinapis alba</i> , <i>Brassica nigra</i> Brassicaceae) | ren   | LF   | Senf                | vol  | OTH | II - CCXIII / CCIII | verapet er die natern und andere giftige thier                                                                                                                                                                                                             |
| <i>Sinapis</i> spp. ( <i>Sinapis alba</i> , <i>Brassica nigra</i> Brassicaceae) | ren   | LF   | Senf                | top  | OTH | II - CCXIII / CCIII | geschwollenem milz                                                                                                                                                                                                                                         |
| <i>Sinapis</i> spp. ( <i>Sinapis alba</i> , <i>Brassica nigra</i> Brassicaceae) | ren   | LF   | Senf                | syst | RES | II - CCXIII / CCIII | macht er leicht auswerffen                                                                                                                                                                                                                                 |
| <i>Sinapis</i> spp. ( <i>Sinapis alba</i> , <i>Brassica nigra</i> Brassicaceae) | ren   | LF   | Senf                | top  | RES | II - CCXIII / CCIII | gegurgelt ist nützlich den geschwollen mandeln und der rauhen                                                                                                                                                                                              |
| <i>Sinapis</i> spp. ( <i>Sinapis alba</i> , <i>Brassica nigra</i> Brassicaceae) | ren   | LF   | Senf                | top  | SKE | II - CCXIII / CCIII | kelen                                                                                                                                                                                                                                                      |
| <i>Sinapis</i> spp. ( <i>Sinapis alba</i> , <i>Brassica nigra</i> Brassicaceae) | ren   | LF   | Senf                | syst | URO | II - CCXIII / CCIII | zu dem hufftwee                                                                                                                                                                                                                                            |
| <i>Sinapis</i> spp. ( <i>Sinapis alba</i> , <i>Brassica nigra</i> Brassicaceae) | ren   | LF   | Senf                | syst | URO | II - CCXIII / CCIII | treibt den harn                                                                                                                                                                                                                                            |
| <i>Sinapis</i> spp. ( <i>Sinapis alba</i> , <i>Brassica nigra</i> Brassicaceae) | ren   | LF   | Senf                | syst | URO | II - CCXIII / CCIII | bring den frawen ir krankheyt                                                                                                                                                                                                                              |
| <i>Sinapis</i> spp. ( <i>Sinapis alba</i> , <i>Brassica nigra</i> Brassicaceae) | ren   | LF   | Senf                | syst | URO | II - CCXIII / CCIII | treibt er den stein                                                                                                                                                                                                                                        |
| <i>Sinapis</i> spp. ( <i>Sinapis alba</i> , <i>Brassica nigra</i> Brassicaceae) | ren   | LF   | Senf                | top  | URO | II - CCXIII / CCIII | den wassersüchtigen übergelegt vertreibt der die übrige                                                                                                                                                                                                    |
| <i>Sinapis</i> spp. ( <i>Sinapis alba</i> , <i>Brassica nigra</i> Brassicaceae) | ren   | LF   | Senf                | top  | URO | II - CCXIII / CCIII | feuchtigkeyt                                                                                                                                                                                                                                               |
| <i>Sinapis</i> spp. ( <i>Sinapis alba</i> , <i>Brassica nigra</i> Brassicaceae) | s pop | KN   | Senf                | top  | DER |                     | p. 414 hautreizend                                                                                                                                                                                                                                         |
| <i>Sinapis</i> spp. ( <i>Sinapis alba</i> , <i>Brassica nigra</i> Brassicaceae) | s pop | UB   | Senf                | top  | CAR |                     | p. 292 Notfallmittel bei Blutdruckkrisen                                                                                                                                                                                                                   |
| <i>Sinapis</i> spp. ( <i>Sinapis alba</i> , <i>Brassica nigra</i> Brassicaceae) | s pop | UB   | Senf                | top  | RES |                     | p. 237 Husten, Atemwegserkrankungen                                                                                                                                                                                                                        |
| <i>Sinapis</i> spp. ( <i>Sinapis alba</i> , <i>Brassica nigra</i> Brassicaceae) | s pop | UB   | Senf                | top  | SKE |                     | p. 292 degenerative rheumatische Erkrankungen                                                                                                                                                                                                              |
| <i>Sinapis</i> spp. ( <i>Sinapis alba</i> , <i>Brassica nigra</i> Brassicaceae) | s pop | WI   | Schwarzer Senf      | syst | GAS |                     | p. 559 Volksmedizin: Appetitanregung                                                                                                                                                                                                                       |
| <i>Sinapis</i> spp. ( <i>Sinapis alba</i> , <i>Brassica nigra</i> Brassicaceae) | s pop | WI   | Schwarzer Senf      | top  | NER |                     | p. 559 Volksmedizin: Pleuritiden, Neuritis                                                                                                                                                                                                                 |
| <i>Sinapis</i> spp. ( <i>Sinapis alba</i> , <i>Brassica nigra</i> Brassicaceae) | s pop | WI   | Schwarzer Senf      | top  | URO |                     | p. 559 Volksmedizin: Harnwegsinfektionen                                                                                                                                                                                                                   |
| <i>Sinapis</i> spp. ( <i>Sinapis alba</i> , <i>Brassica nigra</i> Brassicaceae) | s pop | WI   | Schwarzer Senf      | top  | OTH |                     | p. 559 Volksmedizin: Harnwegsinfekte                                                                                                                                                                                                                       |
| <i>Sinapis</i> spp. ( <i>Sinapis alba</i> , <i>Brassica nigra</i> Brassicaceae) | sci   | WI   | Schwarzer Senf      | top  | RES |                     | p. 559 Akuttherapie                                                                                                                                                                                                                                        |
| <i>Sinapis</i> spp. ( <i>Sinapis alba</i> , <i>Brassica nigra</i> Brassicaceae) | sci   | WI   | Schwarzer Senf      | top  | RES |                     | p. 559 Akute Bronchitis                                                                                                                                                                                                                                    |
| <i>Solanum</i> spp. ( <i>S. nigra</i> , <i>S. dulcamara</i> ) Solanaceae        | ant   | DIOS | Bittersüßer Nachts  | top  | EVE | 231                 | Der Saft der Wurzel mit Honig als Salbe heilt Stumpfsichtigkeit                                                                                                                                                                                            |
| <i>Solanum</i> spp. ( <i>S. nigra</i> , <i>S. dulcamara</i> ) Solanaceae        | ant   | DIOS | Bittersüßer Nachts  | syst | NER | 231                 | Seine Rinde wird den schmerzstillenden Mitteln und den Pastillen zugesetzt                                                                                                                                                                                 |
| <i>Solanum</i> spp. ( <i>S. nigra</i> , <i>S. dulcamara</i> ) Solanaceae        | ant   | DIOS | Bittersüßer Nachts  | syst | NER | 231                 | Mohns                                                                                                                                                                                                                                                      |
| <i>Solanum</i> spp. ( <i>S. nigra</i> , <i>S. dulcamara</i> ) Solanaceae        | ant   | DIOS | Bittersüßer Nachts  | top  | TEE | 231                 | im Munde behalten lindert sie Zahnschmerzen                                                                                                                                                                                                                |
| <i>Solanum</i> spp. ( <i>S. nigra</i> , <i>S. dulcamara</i> ) Solanaceae        | ant   | DIOS | Bittersüßer Nachts  | syst | URO | 231                 | Die Frucht ist stark harntreibend, den Wassersüchtigen werden etwa zwölf Fruchtbüschel gegeben, der Genuss von mehr bewirkt Geistesstörung                                                                                                                 |
| <i>Solanum</i> spp. ( <i>S. nigra</i> , <i>S. dulcamara</i> ) Solanaceae        | mon   | HvB  | Nachtschatten       | top  | CAR | 1-121               | Und wer Herzweh hat oder wer am Herzen schwach ist                                                                                                                                                                                                         |
| <i>Solanum</i> spp. ( <i>S. nigra</i> , <i>S. dulcamara</i> ) Solanaceae        | mon   | HvB  | Nachtschatten       | top  | SKE | 1-121               | wer im Mark der Schenke leidet                                                                                                                                                                                                                             |
| <i>Solanum</i> spp. ( <i>S. nigra</i> , <i>S. dulcamara</i> ) Solanaceae        | mon   | HvB  | Nachtschatten       | top  | TEE | 1-121               | Zahnweh                                                                                                                                                                                                                                                    |
| <i>Solanum</i> spp. ( <i>S. nigra</i> , <i>S. dulcamara</i> ) Solanaceae        | mon   | HvB  | Nachtschatten       | top  | URO | 1-121               | wenn die Füße anschwellen                                                                                                                                                                                                                                  |
| <i>Solanum</i> spp. ( <i>S. nigra</i> , <i>S. dulcamara</i> ) Solanaceae        | ren   | LF   | Nachtschatten       | top  | DER | CCXCVII / CCLXV     | Rotlauf                                                                                                                                                                                                                                                    |
| <i>Solanum</i> spp. ( <i>S. nigra</i> , <i>S. dulcamara</i> ) Solanaceae        | ren   | LF   | Nachtschatten       | top  | EAR | CCXCVII / CCLXV     | vertreiben sie die ohrmützel                                                                                                                                                                                                                               |
| <i>Solanum</i> spp. ( <i>S. nigra</i> , <i>S. dulcamara</i> ) Solanaceae        | ren   | LF   | Nachtschatten       | top  | EVE | CCXCVII / CCLXV     | so ein raesser fuss in die felt                                                                                                                                                                                                                            |
| <i>Solanum</i> spp. ( <i>S. nigra</i> , <i>S. dulcamara</i> ) Solanaceae        | ren   | LF   | Nachtschatten       | top  | GYN | CCXCVII / CCLXV     | stellet der frawen krankheyt                                                                                                                                                                                                                               |
| <i>Solanum</i> spp. ( <i>S. nigra</i> , <i>S. dulcamara</i> ) Solanaceae        | ren   | LF   | Nachtschatten       | top  | NER | CCXCVII / CCLXV     | Weetagen des Haupt                                                                                                                                                                                                                                         |
| <i>Solanum</i> spp. ( <i>S. nigra</i> , <i>S. dulcamara</i> ) Solanaceae        | ren   | LF   | Nachtschatten       | top  | OTH | CCXCVII / CCLXV     | und zu allen hitzigen gebresten                                                                                                                                                                                                                            |
| <i>Solanum</i> spp. ( <i>S. nigra</i> , <i>S. dulcamara</i> ) Solanaceae        | s pop | VAL  | Nachtschatten       | top  | DER |                     | p. 246 dermatose                                                                                                                                                                                                                                           |
| <i>Solanum</i> spp. ( <i>S. nigra</i> , <i>S. dulcamara</i> ) Solanaceae        | s pop | VAL  | Nachtschatten       | top  | DER |                     | p. 370 affections curanees etc.                                                                                                                                                                                                                            |
| <i>Solanum</i> spp. ( <i>S. nigra</i> , <i>S. dulcamara</i> ) Solanaceae        | s pop | VAL  | Nachtschatten       | syst | DER |                     | p. 246 dermatoses                                                                                                                                                                                                                                          |
| <i>Solanum</i> spp. ( <i>S. nigra</i> , <i>S. dulcamara</i> ) Solanaceae        | s pop | VAL  | Nachtschatten       | top  | DER |                     | p. 246 dermatose                                                                                                                                                                                                                                           |
| <i>Solanum</i> spp. ( <i>S. nigra</i> , <i>S. dulcamara</i> ) Solanaceae        | s pop | VAL  | Nachtschatten       | syst | GAS |                     | p. 370 dyspepsies douloureuses, spasmes vesicaux                                                                                                                                                                                                           |
| <i>Solanum</i> spp. ( <i>S. nigra</i> , <i>S. dulcamara</i> ) Solanaceae        | s pop | VAL  | Nachtschatten       | syst | RES |                     | p. 370 coqueluche                                                                                                                                                                                                                                          |
| <i>Solanum</i> spp. ( <i>S. nigra</i> , <i>S. dulcamara</i> ) Solanaceae        | s pop | VAL  | Nachtschatten       | syst | RES |                     | p. 246 asthme coqueluche, pneumonie                                                                                                                                                                                                                        |
| <i>Solanum</i> spp. ( <i>S. nigra</i> , <i>S. dulcamara</i> ) Solanaceae        | s pop | VAL  | Nachtschatten       | syst | SKE |                     | p. 246 rhumatisme, goutte                                                                                                                                                                                                                                  |
| <i>Solanum</i> spp. ( <i>S. nigra</i> , <i>S. dulcamara</i> ) Solanaceae        | sci   | EMA  | Bittersüßer Nachts  | top  | DER | IMPC/734361/2011    | Traditional herbal medicinal product for the symptomatic relief of mild recurrent eczema                                                                                                                                                                   |
| <i>Sorbus domestica</i> L. Rosaceae                                             | ant   | DIOS | Speierling          | syst | GAS | 110                 | dass sie gegessen den Durchfall hemmen                                                                                                                                                                                                                     |
| <i>Sorbus domestica</i> L. Rosaceae                                             | ant   | DIOS | Speierling          | syst | GAS | 110                 | leisten dasselbe dass sie gegessen den Durchfall hemmen                                                                                                                                                                                                    |
| <i>Sorbus domestica</i> L. Rosaceae                                             | ant   | DIOS | Speierling          | syst | GAS | 110                 | leisten dasselbe dass sie gegessen den Durchfall hemmen                                                                                                                                                                                                    |
| <i>Sorbus domestica</i> L. Rosaceae                                             | mon   | HvB  | Speierling          | n.d. | OTH | 3 - 8               | zum Nutzen der Heilkunst                                                                                                                                                                                                                                   |
| <i>Sorbus domestica</i> L. Rosaceae                                             | ren   | LF   | Speierling          | syst | GAS | CCXXVII/CCXVIII     | stellen den Bauchfluss                                                                                                                                                                                                                                     |
| <i>Sorbus domestica</i> L. Rosaceae                                             | s pop | VAL  | Speierling          | syst | GAS | p. 475              | diarrhees, dysenterie                                                                                                                                                                                                                                      |
| <i>Symphytum officinale</i> aggr. Boraginaceae                                  | ant   | DIOS | Beinwell            | top  | DER | 215                 | als Umschlag verklebte sie auch frische Wunden; Als Kataplasma dienen sie bei Entzündungen, besonders am                                                                                                                                                   |
| <i>Symphytum officinale</i> aggr. Boraginaceae                                  | ant   | DIOS | Beinwell            | syst | GAS | 215                 | After, und zwar vorteilhaft mit den Blättern der Kreuzwurz                                                                                                                                                                                                 |
| <i>Symphytum officinale</i> aggr. Boraginaceae                                  | mon   | HvB  | Beinwell            | syst | DER | 1-145               | welche an Blutspeien und inneren Abscessen leiden                                                                                                                                                                                                          |
| <i>Symphytum officinale</i> aggr. Boraginaceae                                  | ren   | LF   | Beinwell, Wallwurz  | top  | DER | CCXCVII / CCLXVI    | Glied im Mensch preis gegeben und geschwürig und verwundet ist                                                                                                                                                                                             |
| <i>Symphytum officinale</i> aggr. Boraginaceae                                  | ren   | LF   | Beinwell, Wallwurz  | top  | DER | CCXCVII / CCLXVI    | trefflich zu allen wunden                                                                                                                                                                                                                                  |
| <i>Symphytum officinale</i> aggr. Boraginaceae                                  | ren   | LF   | Beinwell, Wallwurz  | top  | DER | CCXCVII / CCLXVI    | lindert die hitz des afters                                                                                                                                                                                                                                |
| <i>Symphytum officinale</i> aggr. Boraginaceae                                  | ren   | LF   | Beinwell, Wallwurz  | syst | GAS | CCXCVII / CCLXVI    | stelt die roten rhur                                                                                                                                                                                                                                       |
| <i>Symphytum officinale</i> aggr. Boraginaceae                                  | ren   | LF   | Beinwell, Wallwurz  | syst | GAS | CCXCVII / CCLXVI    | stelt der weiber krankheyt                                                                                                                                                                                                                                 |
| <i>Symphytum officinale</i> aggr. Boraginaceae                                  | ren   | LF   | Beinwell, Wallwurz  | syst | GAS | CCXCVII / CCLXVI    | so blut ausspeien un inwendig gebrochen seind                                                                                                                                                                                                              |
| <i>Symphytum officinale</i> aggr. Boraginaceae                                  | ren   | LF   | Beinwell, Wallwurz  | syst | RES | CCXCVII / CCLXVI    | reynig auch die brust un lingen von dem eyter                                                                                                                                                                                                              |
| <i>Symphytum officinale</i> aggr. Boraginaceae                                  | ren   | LF   | Beinwell, Wallwurz  | top  | SKE | CCXCVII / CCLXVI    | heylet die bruch, beinbrüche                                                                                                                                                                                                                               |
| <i>Symphytum officinale</i> aggr. Boraginaceae                                  | s pop | BVA  | Wallwurz - Beinwell | top  | DER | p. 243              | Wundheilmittel, schlecht heilende Wunden, Narbenschmerzen, Schnitt- und Risswunden, Venenentzündungen,                                                                                                                                                     |
| <i>Symphytum officinale</i> aggr. Boraginaceae                                  | s pop | BVA  | Wallwurz - Beinwell | top  | DER | p. 243              | Wundheilmittel, schlecht heilende Wunden, Narbenschmerzen, Schnitt- und Risswunden, Venenentzündungen,                                                                                                                                                     |
| <i>Symphytum officinale</i> aggr. Boraginaceae                                  | s pop | BVA  | Wallwurz - Beinwell | top  | DER | p. 243              | heilungen des Augapfels                                                                                                                                                                                                                                    |
| <i>Symphytum officinale</i> aggr. Boraginaceae                                  | s pop | BVA  | Wallwurz - Beinwell | top  | GAS | p. 243              | Durchfall, Magen- Darmgeschwüre, Darmentzündungen                                                                                                                                                                                                          |
| <i>Symphytum officinale</i> aggr. Boraginaceae                                  | s pop | BVA  | Wallwurz - Beinwell | top  | NER | p. 243              | Ischias, Nervenschmerzen, Phatomschmerzen                                                                                                                                                                                                                  |
| <i>Symphytum officinale</i> aggr. Boraginaceae                                  | s pop | BVA  | Wallwurz - Beinwell | top  | NER | p. 243              | Ischias, Nervenschmerzen, Phatomschmerzen                                                                                                                                                                                                                  |
| <i>Symphytum officinale</i> aggr. Boraginaceae                                  | s pop | BVA  | Wallwurz - Beinwell | top  | NER | p. 243              | Ischias, Nervenschmerzen, Phatomschmerzen                                                                                                                                                                                                                  |
| <i>Symphytum officinale</i> aggr. Boraginaceae                                  | s pop | BVA  | Wallwurz - Beinwell | top  | RES | p. 243              | Verschleimung der Atemwege                                                                                                                                                                                                                                 |
| <i>Symphytum officinale</i> aggr. Boraginaceae                                  | s pop | BVA  | Wallwurz - Beinwell | syst | SKE | p. 243              | rheumatische Prozesse an Knochen, Gelenken, Muskeln                                                                                                                                                                                                        |

|                                                |              |           |                     |          |                   |                                                                                                                                                                                     |
|------------------------------------------------|--------------|-----------|---------------------|----------|-------------------|-------------------------------------------------------------------------------------------------------------------------------------------------------------------------------------|
|                                                |              |           |                     |          |                   | Knochenerkrankungen, Knochenhautentzündung, Verstauchung, Quetschung, Sport- und Unfallverletzungen, Gelenkeserkrankungen, Kniegelenksbeschwerden, degenerativen Gelenksabnutzungen |
| <i>Symphytum officinale</i> aggr.              | Boraginaceae | s pop BVA | Wallwurz - Beinwell | top SKE  | p. 243            | Knochenerkrankungen, Knochenhautentzündung, Verstauchung, Quetschung, Sport- und Unfallverletzungen, Gelenkeserkrankungen, Kniegelenksbeschwerden, degenerativen Gelenksabnutzungen |
| <i>Symphytum officinale</i> aggr.              | Boraginaceae | s pop BVA | Wallwurz - Beinwell | top SKE  | p. 243            | Gelenksabnutzungen                                                                                                                                                                  |
| <i>Symphytum officinale</i> aggr.              | Boraginaceae | s pop JK  | Beinwell            | syst DER | p. 332            | Blutungen, auch innere Blutungen                                                                                                                                                    |
| <i>Symphytum officinale</i> aggr.              | Boraginaceae | s pop JK  | Beinwell            | top DER  | p. 332            | Wunden, Schrunden                                                                                                                                                                   |
| <i>Symphytum officinale</i> aggr.              | Boraginaceae | s pop JK  | Beinwell            | top SKE  | p. 332            | Brüchen, Leistenbrüchen, Quetschungen, ...                                                                                                                                          |
| <i>Symphytum officinale</i> aggr.              | Boraginaceae | s pop MT  | Beinwell, Wallwurz  | top DER  | p. 12             | äußere Wunden, Krampfadergeschwüre                                                                                                                                                  |
| <i>Symphytum officinale</i> aggr.              | Boraginaceae | s pop MT  | Beinwell, Wallwurz  | syst GAS | p. 12             | Beschwerden des Verdauungsapparates                                                                                                                                                 |
| <i>Symphytum officinale</i> aggr.              | Boraginaceae | s pop MT  | Beinwell, Wallwurz  | syst RES | p. 12             | Bronchialkatarrh                                                                                                                                                                    |
| <i>Symphytum officinale</i> aggr.              | Boraginaceae | s pop MT  | Beinwell, Wallwurz  | top SKE  | p. 12             | rheumatischen Muskelverdickungen, Nackenschmerzen, usw.                                                                                                                             |
| <i>Symphytum officinale</i> aggr.              | Boraginaceae | s pop MT  | Beinwell, Wallwurz  | top SKE  | p. 12             | Quetschungen, Blutergüssen, Knochenbrüchen                                                                                                                                          |
| <i>Symphytum officinale</i> aggr.              | Boraginaceae | s pop UB  | Beinwell            | top SKE  | p. 293            | entzündliche rheumatische Erkrankungen                                                                                                                                              |
| <i>Symphytum officinale</i> aggr.              | Boraginaceae | s pop UB  | Beinwell            | top SKE  | p. 321            | Verstauchungen, Quetschungen, Prellungen                                                                                                                                            |
| <i>Symphytum officinale</i> aggr.              | Boraginaceae | s pop UB  | Beinwell            | top SKE  | p. 321            | Verstauchungen, Quetschungen, Prellungen                                                                                                                                            |
| <i>Symphytum officinale</i> aggr.              | Boraginaceae | s pop UB  | Beinwell            | top SKE  | p. 321            | Verstauchungen, Quetschungen, Prellungen                                                                                                                                            |
| <i>Symphytum officinale</i> aggr.              | Boraginaceae | s pop WI  | Beinwell            | n.d. GAS | p. 569            | Volkshelkunder: Antidiarrhikum                                                                                                                                                      |
| <i>Symphytum officinale</i> aggr.              | Boraginaceae | s pop WI  | Beinwell            | n.d. RES | p. 569            | Volkshelkunder: Bronchitis, Pleuritis                                                                                                                                               |
| <i>Symphytum officinale</i> aggr.              | Boraginaceae | sci EMA   | Beinwell            | top SKE  | IMPC/572846/2009  | Traditional herbal medicinal product used for the symptomatic treatment of minor sprains and bruises                                                                                |
| <i>Symphytum officinale</i> aggr.              | Boraginaceae | sci WI    | Beinwell            | top DER  | p. 569            | Drüsenschwellungen, schlecht heilende Wunden                                                                                                                                        |
| <i>Symphytum officinale</i> aggr.              | Boraginaceae | sci WI    | Beinwell            | top DER  | p. 569            | Parodontose, Pharyngitis und Angina                                                                                                                                                 |
| <i>Symphytum officinale</i> aggr.              | Boraginaceae | sci WI    | Beinwell            | syst GAS | p. 569            | Gastritis, Magen- und Darmgeschwüren                                                                                                                                                |
| <i>Symphytum officinale</i> aggr.              | Boraginaceae | sci WI    | Beinwell            | top SKE  | p. 569            | Knochenhautreizungen, Gelenkentzündungen, Gichtknoten, zur Förderung der Kallusbildung                                                                                              |
| <i>Teucrium</i> spp.                           | Lamiaceae    | ant DIOS  | Gamander            | syst ANT | 196               | Mit Wein getrunken und als Umschlag wirkt sie gegen den Biß giftiger Tiere                                                                                                          |
| <i>Teucrium</i> spp.                           | Lamiaceae    | ant DIOS  | Gamander            | top ANT  | 196               | Mit Wein getrunken und als Umschlag wirkt sie gegen den Biß giftiger Tiere                                                                                                          |
| <i>Teucrium</i> spp.                           | Lamiaceae    | ant DIOS  | Gamander            | syst ANT | 200               | Wein wirkt es gegen den Biß der Schlangen und gegen tödliche Mittel                                                                                                                 |
| <i>Teucrium</i> spp.                           | Lamiaceae    | ant DIOS  | Gamander            | top DER  | 196               | mit Honig, um alte Wunden zu reinigen                                                                                                                                               |
| <i>Teucrium</i> spp.                           | Lamiaceae    | ant DIOS  | Gamander            | top DER  | 200               | Weiter verklebt es Wunden, reinigt alte Geschwüre und bringt sie mit Honig zur Vernarbung, Trocken hält es Fleischwucherungen ein                                                   |
| <i>Teucrium</i> spp.                           | Lamiaceae    | ant DIOS  | Gamander            | top EYE  | 196               | Fein gestoßen mit Öl und eingestrichen entfernt sie Nebel auf den Augen                                                                                                             |
| <i>Teucrium</i> spp.                           | Lamiaceae    | ant DIOS  | Gamander            | syst GAS | 196               | die Kraft, bei Krämpfen, Husten                                                                                                                                                     |
| <i>Teucrium</i> spp.                           | Lamiaceae    | ant DIOS  | Gamander            | syst GAS | 200               | gegen Magenstechen, Dysenterie                                                                                                                                                      |
| <i>Teucrium</i> spp.                           | Lamiaceae    | ant DIOS  | Gamander            | syst GYN | 196               | Sie befördert auch die Menstruation und treibt den Embryo                                                                                                                           |
| <i>Teucrium</i> spp.                           | Lamiaceae    | ant DIOS  | Gamander            | top GYN  | 200               | befördert es die Menstruation                                                                                                                                                       |
| <i>Teucrium</i> spp.                           | Lamiaceae    | ant DIOS  | Gamander            | syst OTH | 196               | erweicht die Milz, wenn sie mit Essig getrunken wird                                                                                                                                |
| <i>Teucrium</i> spp.                           | Lamiaceae    | ant DIOS  | Gamander            | syst RES | 196               | Leberverhärtung                                                                                                                                                                     |
| <i>Teucrium</i> spp.                           | Lamiaceae    | ant DIOS  | Gamander            | syst RES | 200               | Auch reinigt es die Brust von eiterigem dickem Schleim, Ferner hat es gute Wirkung bei altem Husten                                                                                 |
| <i>Teucrium</i> spp.                           | Lamiaceae    | ant DIOS  | Gamander            | syst RES | 200               | bei inneren Rupturen und Krämpfen, wenn es trocken mit Kresse, Honig und Harz zum Leckmittel gemischt wird                                                                          |
| <i>Teucrium</i> spp.                           | Lamiaceae    | ant DIOS  | Gamander            | syst RES | 200               | Leckmittel gemischt wird                                                                                                                                                            |
| <i>Teucrium</i> spp.                           | Lamiaceae    | ant DIOS  | Gamander            | top SKE  | 200               | bei Podagra leistet es gute Dienste, wenn es mit scharfem Essig eingerieben oder mit Wasser umgeschlagen wird                                                                       |
| <i>Teucrium</i> spp.                           | Lamiaceae    | ant DIOS  | Gamander            | syst URO | 196               | Harnverhaltung und harntreibender Wassersucht zu helfen                                                                                                                             |
| <i>Teucrium</i> spp.                           | Lamiaceae    | ant DIOS  | Gamander            | syst URO | 200               | harntreibende Kraft, wenn es frisch fein gestoßen getrunken wird;                                                                                                                   |
| <i>Teucrium</i> spp.                           | Lamiaceae    | ant DIOS  | Gamander            | syst URO | 200               | Harnverhaltung zu 2 Drachmen mit Honigwasser                                                                                                                                        |
| <i>Teucrium</i> spp.                           | Lamiaceae    | ant DIOS  | Gamander            | top URO  | 200               | lindert es anhaltende Unterleibsentzündung                                                                                                                                          |
| <i>Teucrium</i> spp.                           | Lamiaceae    | mon HvB   | Gamander            | top DER  | 1 - 124           | Fleisch ist                                                                                                                                                                         |
| <i>Teucrium</i> spp.                           | Lamiaceae    | ren LF    | Gamander            | syst ANT | CCXCVIII / CCXXXV | widerstehen sie allerley gift                                                                                                                                                       |
| <i>Teucrium</i> spp.                           | Lamiaceae    | ren LF    | Gamander            | top ANT  | CCXCVIII / CCXXXV | widerstehen sie allerley gift, auch ausswendig aufgelegt                                                                                                                            |
| <i>Teucrium</i> spp.                           | Lamiaceae    | ren LF    | Gamander            | top DER  | CCXCVIII / CCXXXV | reinigen sie alte Schaeden / mit oel vermischt ... Heylen sie die bruch / wunden / unnd umb sich fressenden schaeden                                                                |
| <i>Teucrium</i> spp.                           | Lamiaceae    | ren LF    | Gamander            | top EYE  | CCXCVIII / CCXXXV | vertreibt die dunckelheit der augen                                                                                                                                                 |
| <i>Teucrium</i> spp.                           | Lamiaceae    | ren LF    | Gamander            | syst GYN | CCXCVIII / CCXXXV | bringen den frauen ihre zeit                                                                                                                                                        |
| <i>Teucrium</i> spp.                           | Lamiaceae    | ren LF    | Gamander            | syst OTH | CCXCVIII / CCXXXV | machen das milz kleiner                                                                                                                                                             |
| <i>Teucrium</i> spp.                           | Lamiaceae    | ren LF    | Gamander            | syst RES | CCXCVIII / CCXXXV | fürtrefflich denen so husten                                                                                                                                                        |
| <i>Teucrium</i> spp.                           | Lamiaceae    | ren LF    | Gamander            | syst URO | CCXCVIII / CCXXXV | ein hart milz haben, nit wol harnen mögen und so newlich wassersüchtig worden                                                                                                       |
| <i>Teucrium</i> spp.                           | Lamiaceae    | s pop FLU | Gamander            | top DER  | p. 96             | schlecht heilende Wunden                                                                                                                                                            |
| <i>Teucrium</i> spp.                           | Lamiaceae    | s pop FLU | Gamander            | syst GAS | p. 96             | Magenbeschwerden und Appetitlosigkeit, Durchfälle                                                                                                                                   |
| <i>Teucrium</i> spp.                           | Lamiaceae    | s pop JK  | Gamander            | syst URO | 361               | treiben gewaltig den Urin                                                                                                                                                           |
| <i>Thymus</i> spp. (T. vulgaris, T. serpyllum) | Lamiaceae    | ant DIOS  | Quendel             | syst ANT | 179               | auch bei Schlangenbissen                                                                                                                                                            |
| <i>Thymus</i> spp. (T. vulgaris, T. serpyllum) | Lamiaceae    | ant DIOS  | Quendel             | top ANT  | 179               | auch bei Schlangenbissen                                                                                                                                                            |
| <i>Thymus</i> spp. (T. vulgaris, T. serpyllum) | Lamiaceae    | ant DIOS  | Thymian             | top DER  | 178               | geronnene Blut auf und vertreibt Feigwarzen und gestielte Warzen                                                                                                                    |
| <i>Thymus</i> spp. (T. vulgaris, T. serpyllum) | Lamiaceae    | ant DIOS  | Thymian             | syst EYE | 178               | Stumpfsichtigkeit leiden                                                                                                                                                            |
| <i>Thymus</i> spp. (T. vulgaris, T. serpyllum) | Lamiaceae    | ant DIOS  | Thymian             | syst GAS | 179               | Leberanschwellungen                                                                                                                                                                 |
| <i>Thymus</i> spp. (T. vulgaris, T. serpyllum) | Lamiaceae    | ant DIOS  | Quendel             | top GAS  | 179               | stilt er Blutbrüchen                                                                                                                                                                |
| <i>Thymus</i> spp. (T. vulgaris, T. serpyllum) | Lamiaceae    | ant DIOS  | Thymian             | syst GAS | 178               | treibt den Bandwurm                                                                                                                                                                 |
| <i>Thymus</i> spp. (T. vulgaris, T. serpyllum) | Lamiaceae    | ant DIOS  | Thymian             | syst GAS | 178               | hat er die Kraft, den Schleim durch den Bauch abzuführen                                                                                                                            |
| <i>Thymus</i> spp. (T. vulgaris, T. serpyllum) | Lamiaceae    | ant DIOS  | Quendel             | syst GYN | 179               | denn getrunken befördert er die Katamenien                                                                                                                                          |
| <i>Thymus</i> spp. (T. vulgaris, T. serpyllum) | Lamiaceae    | ant DIOS  | Thymian             | syst GYN | 178               | den Embryo und die Nachgeburts aus und befördert die Menstruation                                                                                                                   |
| <i>Thymus</i> spp. (T. vulgaris, T. serpyllum) | Lamiaceae    | ant DIOS  | Quendel             | top NER  | 179               | Lethargie und Hirnwut                                                                                                                                                               |
| <i>Thymus</i> spp. (T. vulgaris, T. serpyllum) | Lamiaceae    | ant DIOS  | Thymian             | syst RES | 178               | Expectoransa                                                                                                                                                                        |
| <i>Thymus</i> spp. (T. vulgaris, T. serpyllum) | Lamiaceae    | ant DIOS  | Thymian             | top SKE  | 178               | als Aufschlag ein gutes Mittel bei Ischias                                                                                                                                          |
| <i>Thymus</i> spp. (T. vulgaris, T. serpyllum) | Lamiaceae    | ant DIOS  | Quendel             | syst URO | 179               | und treibt den Harn                                                                                                                                                                 |
| <i>Thymus</i> spp. (T. vulgaris, T. serpyllum) | Lamiaceae    | ant DIOS  | Thymian             | syst URO | 178               | Er ist auch ein harntreibendes Mittel                                                                                                                                               |
| <i>Thymus</i> spp. (T. vulgaris, T. serpyllum) | Lamiaceae    | mon HvB   | Quendel             | syst DER | 1-32              | Kratze                                                                                                                                                                              |
| <i>Thymus</i> spp. (T. vulgaris, T. serpyllum) | Lamiaceae    | mon HvB   | Quendel             | top DER  | 1-32              | kleine Krätze / Grind                                                                                                                                                               |
| <i>Thymus</i> spp. (T. vulgaris, T. serpyllum) | Lamiaceae    | mon HvB   | Thymian             | top DER  | 1-223             | Lepra                                                                                                                                                                               |
| <i>Thymus</i> spp. (T. vulgaris, T. serpyllum) | Lamiaceae    | mon HvB   | Thymian             | top HUM  | 1-223             | mindert die schlechten Säfte                                                                                                                                                        |
| <i>Thymus</i> spp. (T. vulgaris, T. serpyllum) | Lamiaceae    | mon HvB   | Quendel             | syst NER | 1-32              | Gehirn krank und wie leer                                                                                                                                                           |
| <i>Thymus</i> spp. (T. vulgaris, T. serpyllum) | Lamiaceae    | mon HvB   | Thymian             | top SKE  | 1-223             | Lähmung und Stechen                                                                                                                                                                 |
| <i>Thymus</i> spp. (T. vulgaris, T. serpyllum) | Lamiaceae    | mon MF    | Quendel             | syst ANT | 39                | hilft er bei verderbenbringenden Bissen                                                                                                                                             |
| <i>Thymus</i> spp. (T. vulgaris, T. serpyllum) | Lamiaceae    | mon MF    | Quendel             | top ANT  | 39                | hilft er bei verderbenbringenden Bissen                                                                                                                                             |
| <i>Thymus</i> spp. (T. vulgaris, T. serpyllum) | Lamiaceae    | mon MF    | Quendel             | vol APO  | 39                | Flucht                                                                                                                                                                              |
| <i>Thymus</i> spp. (T. vulgaris, T. serpyllum) | Lamiaceae    | mon MF    | Quendel             | syst GAS | 39                | stilt das Bauchgrimmen und hilft der Milz, Blutspeiden                                                                                                                              |
| <i>Thymus</i> spp. (T. vulgaris, T. serpyllum) | Lamiaceae    | mon MF    | Quendel             | syst GAS | 39                | stilt er den Leberschmerz beruhigen                                                                                                                                                 |
| <i>Thymus</i> spp. (T. vulgaris, T. serpyllum) | Lamiaceae    | mon MF    | Quendel             | syst GYN | 39                | geordneten Monatsfluss bringen                                                                                                                                                      |
| <i>Thymus</i> spp. (T. vulgaris, T. serpyllum) | Lamiaceae    | mon MF    | Quendel             | top NER  | 39                | Kopfwehranke                                                                                                                                                                        |
| <i>Thymus</i> spp. (T. vulgaris, T. serpyllum) | Lamiaceae    | mon MF    | Quendel             | syst URO | 39                | treibt er den Harn                                                                                                                                                                  |
| <i>Thymus</i> spp. (T. vulgaris, T. serpyllum) | Lamiaceae    | ren LF    | Feldthymian         | syst ANT | CCXXIX / XCIII    | gut für das gift der würm und schlangen                                                                                                                                             |
| <i>Thymus</i> spp. (T. vulgaris, T. serpyllum) | Lamiaceae    | ren LF    | Feldthymian         | top ANT  | CCXXIX / XCIII    | gut für das gift der würm und schlangen                                                                                                                                             |
| <i>Thymus</i> spp. (T. vulgaris, T. serpyllum) | Lamiaceae    | ren LF    | Garten Thymian      | syst DER | CCXXIX / CCXXI    | auffgeblasen und geschwollen seind                                                                                                                                                  |

|                                                |           |       |       |                    |      |      |                                                                                       |
|------------------------------------------------|-----------|-------|-------|--------------------|------|------|---------------------------------------------------------------------------------------|
| <i>Thymus</i> spp. (T. vulgaris, T. serpyllum) | Lamiaceae | ren   | LF    | Garten Thymian     | syst | DER  | XCCLXXIII / CCCXI und zerteilt das geronnen blut                                      |
| <i>Thymus</i> spp. (T. vulgaris, T. serpyllum) | Lamiaceae | ren   | LF    | Garten Thymian     | top  | DER  | XCCLXXIII / CCCXI wann die gemacht, aufgeblasen und geschwollen sind                  |
| <i>Thymus</i> spp. (T. vulgaris, T. serpyllum) | Lamiaceae | ren   | LF    | Garten Thymian     | top  | DER  | XCCLXXIII / CCCXI vertreibt die wärzten darüber gelegt                                |
| <i>Thymus</i> spp. (T. vulgaris, T. serpyllum) | Lamiaceae | ren   | LF    | Garten Thymian     | top  | DER  | XCCLXXIII / CCCXI verzert die geschwulst so von kalten flüssen kommen                 |
| <i>Thymus</i> spp. (T. vulgaris, T. serpyllum) | Lamiaceae | ren   | LF    | Garten Thymian     | top  | EYE  | XCCLXXIII / CCCXI alle, die soe bloede augen haben                                    |
| <i>Thymus</i> spp. (T. vulgaris, T. serpyllum) | Lamiaceae | ren   | LF    | Feldthymian        | syst | GAS  | COXXIX / XCIII entzündungen der leber                                                 |
| <i>Thymus</i> spp. (T. vulgaris, T. serpyllum) | Lamiaceae | ren   | LF    | Feldthymian        | syst | GAS  | COXXIX / XCIII stellet das blutspeien                                                 |
| <i>Thymus</i> spp. (T. vulgaris, T. serpyllum) | Lamiaceae | ren   | LF    | Garten Thymian     | syst | GAS  | XCCLXXIII / CCCXI treibt er auss durch den stulgang die zaehen feuchtkgkeit / Pituita |
| <i>Thymus</i> spp. (T. vulgaris, T. serpyllum) | Lamiaceae | ren   | LF    | Garten Thymian     | syst | GAS  | XCCLXXIII / CCCXI geheysen                                                            |
| <i>Thymus</i> spp. (T. vulgaris, T. serpyllum) | Lamiaceae | ren   | LF    | Garten Thymian     | syst | GAS  | XCCLXXIII / CCCXI macht lust zu essen                                                 |
| <i>Thymus</i> spp. (T. vulgaris, T. serpyllum) | Lamiaceae | ren   | LF    | Garten Thymian     | top  | GAS  | XCCLXXIII / CCCXI vertreibt auch gewaltiglich die blaest und wind im bauch            |
| <i>Thymus</i> spp. (T. vulgaris, T. serpyllum) | Lamiaceae | ren   | LF    | Garten Thymian     | syst | GAS  | XCCLXXIII / CCCXI treibt aus die würm                                                 |
| <i>Thymus</i> spp. (T. vulgaris, T. serpyllum) | Lamiaceae | ren   | LF    | Feldthymian        | syst | GYN  | COXXIX / XCIII bringt den frauen ire zeit und treibt den harn                         |
| <i>Thymus</i> spp. (T. vulgaris, T. serpyllum) | Lamiaceae | ren   | LF    | Garten Thymian     | syst | GYN  | XCCLXXIII / CCCXI [treibt aus] das bürdling, bringt den frauen ire zeit               |
| <i>Thymus</i> spp. (T. vulgaris, T. serpyllum) | Lamiaceae | ren   | LF    | Feldthymian        | syst | NER  | COXXIX / XCIII stillt das haubtwee                                                    |
| <i>Thymus</i> spp. (T. vulgaris, T. serpyllum) | Lamiaceae | ren   | LF    | Feldthymian        | top  | NER  | COXXIX / XCIII benimmt die wutende haubtsucht / Phyretrinitum genent                  |
| <i>Thymus</i> spp. (T. vulgaris, T. serpyllum) | Lamiaceae | ren   | LF    | Feldthymian        | top  | NER  | COXXIX / XCIII stillt das haubtwee                                                    |
| <i>Thymus</i> spp. (T. vulgaris, T. serpyllum) | Lamiaceae | ren   | LF    | Garten Thymian     | n.d. | NER  | XCCLXXIII / CCCXI denen so die fallende sucht haben                                   |
| <i>Thymus</i> spp. (T. vulgaris, T. serpyllum) | Lamiaceae | ren   | LF    | Garten Thymian     | vol  | NER  | XCCLXXIII / CCCXI denen so die fallende sucht haben                                   |
| <i>Thymus</i> spp. (T. vulgaris, T. serpyllum) | Lamiaceae | ren   | LF    | Feldthymian        | syst | OTH  | COXXIX / XCIII damit sie (Schmitter) vor auffigen thiern sicher weren                 |
| <i>Thymus</i> spp. (T. vulgaris, T. serpyllum) | Lamiaceae | ren   | LF    | Feldthymian        | vol  | OTH  | COXXIX / XCIII veragt allerley giftige thier                                          |
| <i>Thymus</i> spp. (T. vulgaris, T. serpyllum) | Lamiaceae | ren   | LF    | Garten Thymian     | syst | RES  | XCCLXXIII / CCCXI macht ausswerffen                                                   |
| <i>Thymus</i> spp. (T. vulgaris, T. serpyllum) | Lamiaceae | ren   | LF    | Garten Thymian     | syst | RES  | XCCLXXIII / CCCXI ist bequiem und nützlich denen so keichen und einen schweren        |
| <i>Thymus</i> spp. (T. vulgaris, T. serpyllum) | Lamiaceae | ren   | LF    | Garten Thymian     | syst | RES  | XCCLXXIII / CCCXI athemb haben                                                        |
| <i>Thymus</i> spp. (T. vulgaris, T. serpyllum) | Lamiaceae | ren   | LF    | Garten Thymian     | top  | SKE  | XCCLXXIII / CCCXI ist er hüfflich dem hüfftwee                                        |
| <i>Thymus</i> spp. (T. vulgaris, T. serpyllum) | Lamiaceae | ren   | LF    | Feldthymian        | syst | URO  | COXXIX / XCIII und treibt den harn                                                    |
| <i>Thymus</i> spp. (T. vulgaris, T. serpyllum) | Lamiaceae | s pop | BVA   | Wilder Thymian - Q | syst | NER  | 0. 230 Nervenschwäche                                                                 |
| <i>Thymus</i> spp. (T. vulgaris, T. serpyllum) | Lamiaceae | s pop | BVA   | Wilder Thymian - Q | syst | NER  | 0. 230 Nervenschwäche                                                                 |
| <i>Thymus</i> spp. (T. vulgaris, T. serpyllum) | Lamiaceae | s pop | BVA   | Wilder Thymian - Q | syst | RES  | p. 230 Erkältung, Asthma,                                                             |
| <i>Thymus</i> spp. (T. vulgaris, T. serpyllum) | Lamiaceae | s pop | BVA   | Wilder Thymian - Q | syst | RES  | p. 230 Erkältung, Asthma,                                                             |
| <i>Thymus</i> spp. (T. vulgaris, T. serpyllum) | Lamiaceae | s pop | BVA   | Wilder Thymian - Q | top  | SKE  | p. 230 Rheuma, Gicht, Gliederschmerzen                                                |
| <i>Thymus</i> spp. (T. vulgaris, T. serpyllum) | Lamiaceae | s pop | BVA   | Wilder Thymian - Q | top  | SKE  | p. 230 Gliederschmerzen, Rheumatischen Erkrankungen                                   |
| <i>Thymus</i> spp. (T. vulgaris, T. serpyllum) | Lamiaceae | s pop | BVA   | Wilder Thymian - Q | syst | TON  | p. 230 Blutarumt                                                                      |
| <i>Thymus</i> spp. (T. vulgaris, T. serpyllum) | Lamiaceae | s pop | BVA   | Wilder Thymian - Q | syst | TON  | p. 230 Blutarumt                                                                      |
| <i>Thymus</i> spp. (T. vulgaris, T. serpyllum) | Lamiaceae | s pop | BVA   | Wilder Thymian - Q | top  | TON  | p. 230 schwächliche kinder                                                            |
| <i>Thymus</i> spp. (T. vulgaris, T. serpyllum) | Lamiaceae | s pop | BVA   | Wilder Thymian - Q | syst | URO  | p. 230 Blasenleiden, Entzündungen der Harnwege                                        |
| <i>Thymus</i> spp. (T. vulgaris, T. serpyllum) | Lamiaceae | s pop | BVA   | Wilder Thymian - Q | syst | URO  | p. 230 Blasenleiden, Entzündungen der Harnwege                                        |
| <i>Thymus</i> spp. (T. vulgaris, T. serpyllum) | Lamiaceae | s pop | JK    | Thymian            | syst | DER  | p. 429 Kopfschorf                                                                     |
| <i>Thymus</i> spp. (T. vulgaris, T. serpyllum) | Lamiaceae | s pop | JK    | Thymian            | syst | GAS  | p. 429 Speisen                                                                        |
| <i>Thymus</i> spp. (T. vulgaris, T. serpyllum) | Lamiaceae | s pop | JK    | Thymian            | top  | NER  | p. 429 bring guten Schlaf                                                             |
| <i>Thymus</i> spp. (T. vulgaris, T. serpyllum) | Lamiaceae | s pop | JK    | Thymian            | vol  | NER  | p. 429 Ohnmachten und Schlaganfall                                                    |
| <i>Thymus</i> spp. (T. vulgaris, T. serpyllum) | Lamiaceae | s pop | UB    | Thymian            | top  | DER  | p. 357 Haut- und Fusspilz                                                             |
| <i>Thymus</i> spp. (T. vulgaris, T. serpyllum) | Lamiaceae | s pop | UB    | Quendel            | syst | RES  | p. 218 bei Keuchhusten und Asthma                                                     |
| <i>Thymus</i> spp. (T. vulgaris, T. serpyllum) | Lamiaceae | s pop | UB    | Quendel            | top  | RES  | p. 218 bei Keuchhusten und Asthma                                                     |
| <i>Thymus</i> spp. (T. vulgaris, T. serpyllum) | Lamiaceae | s pop | UB    | Quendel            | vol  | RES  | p. 218 bei Keuchhusten und Asthma                                                     |
| <i>Thymus</i> spp. (T. vulgaris, T. serpyllum) | Lamiaceae | s pop | UB    | Thymian            | syst | RES  | p. 219 Auswurfterend, usw.                                                            |
| <i>Thymus</i> spp. (T. vulgaris, T. serpyllum) | Lamiaceae | s pop | WI    | Thymian            | syst | GAS  | p. 379 Volksmedizin: Stomachum und Karminativum, Wurmmittel                           |
| <i>Thymus</i> spp. (T. vulgaris, T. serpyllum) | Lamiaceae | s pop | WI    | Quendel            | syst | n.d. | p. 356 Volksmedizin: Kräuterkuren und Bäder                                           |
| <i>Thymus</i> spp. (T. vulgaris, T. serpyllum) | Lamiaceae | s pop | WI    | Quendel            | top  | SKE  | p. 356 Volksmedizin: rheumatischen Schmerzen, Verstauchungen                          |
| <i>Thymus</i> spp. (T. vulgaris, T. serpyllum) | Lamiaceae | s pop | WI    | Quendel            | syst | URO  | p. 356 Volksmedizin: Blasen- und Nierenerkrankungen                                   |
| <i>Thymus</i> spp. (T. vulgaris, T. serpyllum) | Lamiaceae | sci   | EMA   | Thymian            | top  | RES  | IMPC/25552/2009, coughs and colds                                                     |
| <i>Thymus</i> spp. (T. vulgaris, T. serpyllum) | Lamiaceae | sci   | EMA   | Thymian            | syst | RES  | IMPC/342332/2013, productive cough                                                    |
| <i>Thymus</i> spp. (T. vulgaris, T. serpyllum) | Lamiaceae | sci   | EMA   | Thymian            | syst | RES  | IMPC/342332/2013, productive cough                                                    |
| <i>Thymus</i> spp. (T. vulgaris, T. serpyllum) | Lamiaceae | sci   | ESCAP | Thymi herba        | top  | DER  | I.p. 505 stomatitis and halitosis                                                     |
| <i>Thymus</i> spp. (T. vulgaris, T. serpyllum) | Lamiaceae | sci   | WI    | Thymian            | top  | DER  | p. 579 Entzündungen im Mund- und Rachenraum                                           |
| <i>Thymus</i> spp. (T. vulgaris, T. serpyllum) | Lamiaceae | sci   | WI    | Thymian            | top  | DER  | p. 579 Kräuterkissen                                                                  |
| <i>Triticum aestivum</i> aggr.                 | Poaceae   | ant   | DIOS  | Weizen             | syst | ANT  | 135 hilft gegen Viperbiss                                                             |
| <i>Triticum aestivum</i> aggr.                 | Poaceae   | ant   | DIOS  | Weizen             | top  | ANT  | 135 aufgelegt hilft er gegen den Biss des wutenden Hundes                             |
| <i>Triticum aestivum</i> aggr.                 | Poaceae   | ant   | DIOS  | Weizen             | top  | ANT  | 135 Umschlag gegen den Biss giftiger Tiere.                                           |
| <i>Triticum aestivum</i> aggr.                 | Poaceae   | ant   | DIOS  | Weizen             | syst | DER  | 135 gegen jede Entzündung                                                             |
| <i>Triticum aestivum</i> aggr.                 | Poaceae   | ant   | DIOS  | Weizen             | top  | DER  | 135 Mit Sauerhonig entfernt es Leberflecken                                           |
| <i>Triticum aestivum</i> aggr.                 | Poaceae   | ant   | DIOS  | Weizen             | top  | DER  | 139 Höhlungen (Cavernen) und Pusteln                                                  |
| <i>Triticum aestivum</i> aggr.                 | Poaceae   | ant   | DIOS  | Weizen             | top  | DER  | 135, mit Salz die anderen Geschwüre und Furunkeln                                     |
| <i>Triticum aestivum</i> aggr.                 | Poaceae   | ant   | DIOS  | Weizen             | top  | EYE  | 139 Es wirkt gegen Augenflüsse                                                        |
| <i>Triticum aestivum</i> aggr.                 | Poaceae   | ant   | DIOS  | Weizen             | syst | GAS  | 135 Bauchfluss                                                                        |
| <i>Triticum aestivum</i> aggr.                 | Poaceae   | ant   | DIOS  | Weizen             | syst | GAS  | 139 Blutsturz                                                                         |
| <i>Triticum aestivum</i> aggr.                 | Poaceae   | ant   | DIOS  | Weizen             | syst | GAS  | 135 und Lebschneiden                                                                  |
| <i>Triticum aestivum</i> aggr.                 | Poaceae   | ant   | DIOS  | Weizen             | top  | GAS  | 135 Aufblähen der Eingeweide                                                          |
| <i>Triticum aestivum</i> aggr.                 | Poaceae   | ant   | DIOS  | Weizen             | syst | GYN  | 135 erleichtert sie geschwollene Brüste                                               |
| <i>Triticum aestivum</i> aggr.                 | Poaceae   | ant   | DIOS  | Weizen             | top  | NER  | 135, fluß                                                                             |
| <i>Triticum aestivum</i> aggr.                 | Poaceae   | ant   | DIOS  | Weizen             | syst | RES  | 139 lindert die Schmerzen in der Luftröhre                                            |
| <i>Triticum aestivum</i> aggr.                 | Poaceae   | ant   | DIOS  | Weizen             | syst | RES  | 135 und Butter gekocht gegen Husten und Rauheit der Luftröhre                         |
| <i>Triticum aestivum</i> aggr.                 | Poaceae   | ant   | DIOS  | Weizen             | syst | RES  | 135, hilft es als Leckmittel gegen Blutspeien, wirkt auch mit Pfefferminze            |
| <i>Triticum aestivum</i> aggr.                 | Poaceae   | ant   | DIOS  | Weizen             | top  | DER  | 1 - 1 Wenn aber ein Hund mit den Zähnen einen Menschen beißt                          |
| <i>Triticum aestivum</i> aggr.                 | Poaceae   | mon   | HvB   | Weizen             | top  | NER  | 1 - 1 Wahnsinn geplagt wird, wie wenn er verrückt wäre                                |
| <i>Triticum aestivum</i> aggr.                 | Poaceae   | mon   | HvB   | Weizen             | top  | SKE  | 1 - 1 Und wer im Rücken und in den Lenden Schmerzen hat,                              |
| <i>Triticum aestivum</i> aggr.                 | Poaceae   | ren   | LF    | Weizen             | top  | DER  | XIX - CCCLXX / CCLI anfang seind                                                      |
| <i>Triticum aestivum</i> aggr.                 | Poaceae   | ren   | LF    | Weizen             | top  | DER  | XIX - CCCLXX / CCLI es dieselbigen                                                    |
| <i>Triticum aestivum</i> aggr.                 | Poaceae   | ren   | LF    | Weizen             | top  | DER  | XIX - CCCLXX / CCLI legen sie nider die schwolnen brüst                               |
| <i>Triticum aestivum</i> aggr.                 | Poaceae   | ren   | LF    | Weizen             | top  | DER  | XIX - CCCLXX / CCLI verzert alle beulen                                               |
| <i>Triticum aestivum</i> aggr.                 | Poaceae   | ren   | LF    | Weizen             | top  | DER  | XIX - CCCLXX / CCLI frisch brodt in wasser und salz gebeyzt vertreibt die flechen und |
| <i>Triticum aestivum</i> aggr.                 | Poaceae   | ren   | LF    | Weizen             | top  | DER  | XIX - CCCLXX / CCLI zittermaeler                                                      |
| <i>Triticum aestivum</i> aggr.                 | Poaceae   | ren   | LF    | Weizen             | top  | DER  | XIX - CCCLXX / CCLI heylt die biss der hirn                                           |
| <i>Triticum aestivum</i> aggr.                 | Poaceae   | ren   | LF    | Weizen             | top  | DER  | XIX - CCCLXX / CCLI vertreibt er die rossmucken under dem angesicht                   |
| <i>Triticum aestivum</i> aggr.                 | Poaceae   | ren   | LF    | Weizen             | top  | DER  | XIX - CCCLXX / CCLI thut er auff und zeitiget allerley geschwaer                      |
| <i>Triticum aestivum</i> aggr.                 | Poaceae   | ren   | LF    | Weizen             | syst | GAS  | XIX - CCCLXX / CCLI das brodt nun so alt ist und hert worden stelt den bauchfluss     |
| <i>Triticum aestivum</i> aggr.                 | Poaceae   | ren   | LF    | Weizen             | syst | GAS  | XIX - CCCLXX / CCLI nützlich denen so blut speien                                     |
| <i>Triticum aestivum</i> aggr.                 | Poaceae   | ren   | LF    | Weizen             | n.d. | n.d. | XIX - CCCLXX / CCLI der hefel von Weytzen ist einer warmen ausziehenden krafft        |
| <i>Triticum aestivum</i> aggr.                 | Poaceae   | ren   | LF    | Weizen             | top  | NER  | XIX - CCCLXX / CCLI ist gut zu den flüssen des gaeader oder der nerven                |
| <i>Triticum aestivum</i> aggr.                 | Poaceae   | ren   | LF    | Weizen             | top  | RES  | XIX - CCCLXX / CCLI heylt die geschwulst der mandeln                                  |

|                               |            |       |      |             |      |      |                                                                                                                              |
|-------------------------------|------------|-------|------|-------------|------|------|------------------------------------------------------------------------------------------------------------------------------|
| <i>Triticum aestivum</i> agg. | Poaceae    | ren   | LF   | Weizen      | top  | SKE  | XIX - CCCLXX / CCLI podagra                                                                                                  |
| <i>Triticum aestivum</i> agg. | Poaceae    | ren   | LF   | Weizen      | top  | SKE  | XIX - CCCLXX / CCLI sind gut zu den brüchen                                                                                  |
| <i>Triticum aestivum</i> agg. | Poaceae    | s pop | UB   | Weizen      | top  | DER  | p. 338 Neurodermits                                                                                                          |
| <i>Tussilago farfara</i> L.   | Asteraceae | ant   | DIOS | Huflattich  | top  | DER  | 200. als Umschlag heilen roseartige und alle anderen Entzündungen                                                            |
| <i>Tussilago farfara</i> L.   | Asteraceae | ant   | DIOS | Huflattich  | vol  | DER  | 200 Es öffnet aber auch die Absetzesse in der Brust                                                                          |
| <i>Tussilago farfara</i> L.   | Asteraceae | ant   | DIOS | Huflattich  | vol  | DER  | 200 Es öffnet aber auch die Absetzesse in der Brust                                                                          |
| <i>Tussilago farfara</i> L.   | Asteraceae | ant   | DIOS | Huflattich  | syst | GYN  | Sie treibt in Honigwasser gekocht und getrunken den toten Embryo aus                                                         |
| <i>Tussilago farfara</i> L.   | Asteraceae | ant   | DIOS | Huflattich  | vol  | RES  | 200 trockenem Husten und Orthopnöe belästigt worden, wenn sie den Dampf mit geöffnetem Munde aufnehmen und herunterschlucken |
| <i>Tussilago farfara</i> L.   | Asteraceae | ant   | DIOS | Huflattich  | vol  | RES  | 200 trockenem Husten und Orthopnöe belästigt worden, wenn sie den Dampf mit geöffnetem Munde aufnehmen und herunterschlucken |
| <i>Tussilago farfara</i> L.   | Asteraceae | mon   | HvB  | Huflattich  | syst | GAS  | 1-211 geschädigt                                                                                                             |
| <i>Tussilago farfara</i> L.   | Asteraceae | ren   | LF   | Huflattich  | top  | DER  | LXXVI / L leschen allerley hitz und heylen das rotlauff                                                                      |
| <i>Tussilago farfara</i> L.   | Asteraceae | ren   | LF   | Huflattich  | top  | n.d. | LXXVI / L artzney seien zu dem brandt                                                                                        |
| <i>Tussilago farfara</i> L.   | Asteraceae | ren   | LF   | Huflattich  | vol  | RES  | LXXVI / L heylen sie die trucken husten unnd das keichen ider enge des                                                       |
| <i>Tussilago farfara</i> L.   | Asteraceae | ren   | LF   | Huflattich  | vol  | RES  | LXXVI / L athembs / sie brechen auch die apostem der brust                                                                   |
| <i>Tussilago farfara</i> L.   | Asteraceae | ren   | LF   | Huflattich  | vol  | RES  | LXXVI / L apostem der brust                                                                                                  |
| <i>Tussilago farfara</i> L.   | Asteraceae | s pop | BVA  | Huflattich  | syst | RES  | p. 103 Bronchialastmah                                                                                                       |
| <i>Tussilago farfara</i> L.   | Asteraceae | s pop | BVA  | Huflattich  | syst | RES  | p. 103 Bronchialastmah                                                                                                       |
| <i>Tussilago farfara</i> L.   | Asteraceae | s pop | BVA  | Huflattich  | syst | RES  | p. 103 Bronchialastmah                                                                                                       |
| <i>Tussilago farfara</i> L.   | Asteraceae | s pop | JK   | Huflattich  | top  | DER  | p. 376 in der Nierengegend, Krampfadern, Geschwüren und Hühneraugen                                                          |
| <i>Tussilago farfara</i> L.   | Asteraceae | s pop | JK   | Huflattich  | vol  | OTH  | p. 376 unschädlicher Tabak                                                                                                   |
| <i>Tussilago farfara</i> L.   | Asteraceae | s pop | JK   | Huflattich  | top  | SKE  | p. 376 Quetschungen, Verrenkungen                                                                                            |
| <i>Tussilago farfara</i> L.   | Asteraceae | s pop | KN   | Huflattich  | top  | DER  | p. 474 auf offene Geschwüre, offene Füße, Rotlauf/Gesichtsrose                                                               |
| <i>Tussilago farfara</i> L.   | Asteraceae | s pop | KN   | Huflattich  | syst | GAS  | p. 474 Wirkung auf Magen und Darm                                                                                            |
| <i>Tussilago farfara</i> L.   | Asteraceae | s pop | KN   | Huflattich  | syst | RES  | p. 474 und Husten                                                                                                            |
| <i>Tussilago farfara</i> L.   | Asteraceae | s pop | KN   | Huflattich  | top  | RES  | p. 474 auf ein Tuch geheftet und auf die Brust gelegt                                                                        |
| <i>Tussilago farfara</i> L.   | Asteraceae | s pop | MT   | Huflattich  | top  | EAR  | p. 24 Ohrenscherzen                                                                                                          |
| <i>Tussilago farfara</i> L.   | Asteraceae | s pop | MT   | Huflattich  | vol  | RES  | p. 24 Bronchitis, erstickender Atemnot                                                                                       |
| <i>Tussilago farfara</i> L.   | Asteraceae | s pop | MT   | Huflattich  | top  | RES  | p. 24 schwere Lungenerkrankung                                                                                               |
| <i>Tussilago farfara</i> L.   | Asteraceae | s pop | UB   | Huflattich  | syst | RES  | p. 211 Husten                                                                                                                |
| <i>Tussilago farfara</i> L.   | Asteraceae | sci   | WI   | Huflattich  | syst | RES  | p. 215 katarrhalischen Entzündungen, trockenem Reizhusten usw.                                                               |
| <i>Urtica dioica</i> L.       | Urticaceae | ant   | DIOS | Brennnessel | top  | ANT  | 237 Schamtheilen und Abscesse                                                                                                |
| <i>Urtica dioica</i> L.       | Urticaceae | ant   | DIOS | Brennnessel | syst | APH  | 237 reizt zum Beischlaf und öffnet die Gebärmutter                                                                           |
| <i>Urtica dioica</i> L.       | Urticaceae | ant   | DIOS | Brennnessel | top  | DER  | 237 Schamtheilen und Abscesse                                                                                                |
| <i>Urtica dioica</i> L.       | Urticaceae | ant   | DIOS | Brennnessel | top  | DER  | 237 helfen auch gegen Nasenbluten                                                                                            |
| <i>Urtica dioica</i> L.       | Urticaceae | ant   | DIOS | Brennnessel | top  | DER  | 237 beschränkt die Entzündung des Zäpfchens                                                                                  |
| <i>Urtica dioica</i> L.       | Urticaceae | ant   | DIOS | Brennnessel | syst | GAS  | 237 erweichen die Blätter den Bauch, vertreiben Blähungen                                                                    |
| <i>Urtica dioica</i> L.       | Urticaceae | ant   | DIOS | Brennnessel | top  | GYN  | 237 Gebärmuttervorfälle in Ordnung                                                                                           |
| <i>Urtica dioica</i> L.       | Urticaceae | ant   | DIOS | Brennnessel | top  | GYN  | 237 befördern sie mit Myrrhe im Zäpfchen die Menstruation                                                                    |
| <i>Urtica dioica</i> L.       | Urticaceae | ant   | DIOS | Brennnessel | syst | GYN  | 237 (reizt zum Beischlaf) und öffnet die Gebärmutter                                                                         |
| <i>Urtica dioica</i> L.       | Urticaceae | ant   | DIOS | Brennnessel | syst | GYN  | 237 befördert die Katamenien                                                                                                 |
| <i>Urtica dioica</i> L.       | Urticaceae | ant   | DIOS | Brennnessel | top  | OTH  | 237 Milzkranken werden sie mit Wachssalbe                                                                                    |
| <i>Urtica dioica</i> L.       | Urticaceae | ant   | DIOS | Brennnessel | syst | RES  | 237 den faulniswidrigen Mitteln zugesetzt                                                                                    |
| <i>Urtica dioica</i> L.       | Urticaceae | ant   | DIOS | Brennnessel | syst | RES  | 237 Ptisane gekocht reinigen sie die Brust                                                                                   |
| <i>Urtica dioica</i> L.       | Urticaceae | ant   | DIOS | Brennnessel | top  | SKE  | 237 Schamtheilen und Abscesse                                                                                                |
| <i>Urtica dioica</i> L.       | Urticaceae | ant   | DIOS | Brennnessel | syst | URO  | 237 und treiben den Harn                                                                                                     |
| <i>Urtica dioica</i> L.       | Urticaceae | mon   | HvB  | Brennnessel | syst | GAS  | 1-100 reinigt den Magen                                                                                                      |
| <i>Urtica dioica</i> L.       | Urticaceae | mon   | MF   | Brennnessel | syst | APH  | 4 erregt Liebeskraft                                                                                                         |
| <i>Urtica dioica</i> L.       | Urticaceae | mon   | MF   | Brennnessel | syst | DER  | 4 hergestellt                                                                                                                |
| <i>Urtica dioica</i> L.       | Urticaceae | mon   | MF   | Brennnessel | syst | DER  | 4 Blutstillung                                                                                                               |
| <i>Urtica dioica</i> L.       | Urticaceae | mon   | MF   | Brennnessel | syst | DER  | 4 grosses Geschwulst des Rachenzapfchens massigien                                                                           |
| <i>Urtica dioica</i> L.       | Urticaceae | mon   | MF   | Brennnessel | syst | DER  | 4 heilt Krebs und Mumps                                                                                                      |
| <i>Urtica dioica</i> L.       | Urticaceae | mon   | MF   | Brennnessel | syst | DER  | 4 in Nase eingeführt, lockt Saft oder auch nur ein Nesselblatt das Blut                                                      |
| <i>Urtica dioica</i> L.       | Urticaceae | mon   | MF   | Brennnessel | top  | DER  | 4 hervor                                                                                                                     |
| <i>Urtica dioica</i> L.       | Urticaceae | mon   | MF   | Brennnessel | syst | GAS  | 4 treibt Windblähungen aus dem Bauch                                                                                         |
| <i>Urtica dioica</i> L.       | Urticaceae | mon   | MF   | Brennnessel | syst | GAS  | 4 treibt Windblähungen aus dem Bauch                                                                                         |
| <i>Urtica dioica</i> L.       | Urticaceae | mon   | MF   | Brennnessel | syst | GAS  | 4 Gelbsüchtigen                                                                                                              |
| <i>Urtica dioica</i> L.       | Urticaceae | mon   | MF   | Brennnessel | syst | GAS  | 4 Bauchgrimmen                                                                                                               |
| <i>Urtica dioica</i> L.       | Urticaceae | mon   | MF   | Brennnessel | syst | GYN  | 4 schliesst                                                                                                                  |
| <i>Urtica dioica</i> L.       | Urticaceae | mon   | MF   | Brennnessel | syst | GYN  | 4 bringt Monatsblutung in Bewahrung                                                                                          |
| <i>Urtica dioica</i> L.       | Urticaceae | mon   | MF   | Brennnessel | syst | HUM  | 4 schädliche Körpersäfte zu trocknen                                                                                         |
| <i>Urtica dioica</i> L.       | Urticaceae | mon   | MF   | Brennnessel | syst | HUM  | 4 salbt man den Kranken ein, so erregt das den Schweiss                                                                      |
| <i>Urtica dioica</i> L.       | Urticaceae | mon   | MF   | Brennnessel | syst | n.d. | 4 erweicht es den Leib                                                                                                       |
| <i>Urtica dioica</i> L.       | Urticaceae | mon   | MF   | Brennnessel | syst | OTH  | 4 Milzschwellung                                                                                                             |
| <i>Urtica dioica</i> L.       | Urticaceae | mon   | MF   | Brennnessel | syst | RES  | 4 treibt Kälte aus den Lungen                                                                                                |
| <i>Urtica dioica</i> L.       | Urticaceae | mon   | MF   | Brennnessel | syst | RES  | 4 treibt Kälte aus den Lungen                                                                                                |
| <i>Urtica dioica</i> L.       | Urticaceae | mon   | MF   | Brennnessel | syst | RES  | 4 verstopfter Husten                                                                                                         |
| <i>Urtica dioica</i> L.       | Urticaceae | mon   | MF   | Brennnessel | syst | RES  | 4 Galen spricht noch: wenn du das Haupt oftmals mit Saft des                                                                 |
| <i>Urtica dioica</i> L.       | Urticaceae | mon   | MF   | Brennnessel | syst | RES  | 4 Nesselsamens salbt, wird der Katarrh zurück gedrängt                                                                       |
| <i>Urtica dioica</i> L.       | Urticaceae | mon   | MF   | Brennnessel | syst | SKE  | 4 Rippenfellschmerzen, Brust- und Lungenkranke                                                                               |
| <i>Urtica dioica</i> L.       | Urticaceae | mon   | MF   | Brennnessel | syst | SKE  | 4 verrenkte Glieder                                                                                                          |
| <i>Urtica dioica</i> L.       | Urticaceae | mon   | MF   | Brennnessel | syst | SKE  | 4 kranke Glieder                                                                                                             |
| <i>Urtica dioica</i> L.       | Urticaceae | mon   | MF   | Brennnessel | syst | SKE  | 4 lindert die Fussgicht (Podagra), hilft bei allen Leiden der Gelenke                                                        |
| <i>Urtica dioica</i> L.       | Urticaceae | mon   | MF   | Brennnessel | syst | URO  | 4 führt er Harnfluss im Übermass herbei                                                                                      |
| <i>Urtica dioica</i> L.       | Urticaceae | ren   | LF   | Brennnessel | n.d. | ANT  | LVII - LIX / XXXVII ist ganz zuwider dem wutzelring un giftigen schwammen                                                    |
| <i>Urtica dioica</i> L.       | Urticaceae | ren   | LF   | Brennnessel | syst | APH  | LVII - LIX / XXXVII reitzet zur unkeuschheit                                                                                 |
| <i>Urtica dioica</i> L.       | Urticaceae | ren   | LF   | Brennnessel | top  | DER  | LVII - LIX / XXXVII zerteylen sie auch allerley geschwulst also ormtüzel und dergleichen                                     |
| <i>Urtica dioica</i> L.       | Urticaceae | ren   | LF   | Brennnessel | top  | DER  | LVII - LIX / XXXVII ist gut zu dem geschwollen zepfflin                                                                      |
| <i>Urtica dioica</i> L.       | Urticaceae | ren   | LF   | Brennnessel | top  | DER  | LVII - LIX / XXXVII vertreibt das har aussfallen unnd den boesen grind                                                       |
| <i>Urtica dioica</i> L.       | Urticaceae | ren   | LF   | Brennnessel | top  | DER  | LVII - LIX / XXXVII boesen grind                                                                                             |
| <i>Urtica dioica</i> L.       | Urticaceae | ren   | LF   | Brennnessel | syst | GAS  | LVII - LIX / XXXVII lindern den stulgang                                                                                     |



Dal Cero M., Saller R., Leonti M., Weckerle C.S.

|                                    |                  |           |                |           |                    |                                                                                                                                                                                            |
|------------------------------------|------------------|-----------|----------------|-----------|--------------------|--------------------------------------------------------------------------------------------------------------------------------------------------------------------------------------------|
| <i>Valeriana officinalis</i> aggr. | Caprifoliaceae   | s pop BVA | Baldrian       | syst. GAS | p. 34              | Krampfzustände im Magen-, Darmbereich, krampfartiges Erbrechen,                                                                                                                            |
| <i>Valeriana officinalis</i> aggr. | Caprifoliaceae   | s pop BVA | Baldrian       | syst. GYN | p. 34              | Wechseljahrsbeschwerden, krampfartige Menstruation,                                                                                                                                        |
| <i>Valeriana officinalis</i> aggr. | Caprifoliaceae   | s pop BVA | Baldrian       | syst. GYN | p. 34              | Wechseljahrsbeschwerden, krampfartige Menstruation, Schlaflosigkeit, Nervosität, nervöse Herzstörungen, Herzklopfen, nervöse Kopfschmerzen, Migräne, Angst, Erregungszustände,             |
| <i>Valeriana officinalis</i> aggr. | Caprifoliaceae   | s pop BVA | Baldrian       | syst. NER | p. 34              | nervöse Kinder                                                                                                                                                                             |
| <i>Valeriana officinalis</i> aggr. | Caprifoliaceae   | s pop BVA | Baldrian       | syst. NER | p. 34              | Schlaflosigkeit, Nervosität, nervöse Herzstörungen, Herzklopfen, nervöse Kopfschmerzen, Migräne, Angst, Erregungszustände,                                                                 |
| <i>Valeriana officinalis</i> aggr. | Caprifoliaceae   | s pop BVA | Baldrian       | syst. NER | p. 34              | nervöse Kinder                                                                                                                                                                             |
| <i>Valeriana officinalis</i> aggr. | Caprifoliaceae   | s pop BVA | Baldrian       | syst. OTH | p. 34              | Schilddrüsenüberfunktion                                                                                                                                                                   |
| <i>Valeriana officinalis</i> aggr. | Caprifoliaceae   | s pop BVA | Baldrian       | syst. OTH | p. 34              | Schilddrüsenüberfunktion                                                                                                                                                                   |
| <i>Valeriana officinalis</i> aggr. | Caprifoliaceae   | s pop BVA | Baldrian       | syst. OTH | p. 34              | Abgewöhnung von Alkohol, Nikotin                                                                                                                                                           |
| <i>Valeriana officinalis</i> aggr. | Caprifoliaceae   | s pop BVA | Baldrian       | syst. OTH | p. 34              | Abgewöhnung von Alkohol, Nikotin                                                                                                                                                           |
| <i>Valeriana officinalis</i> aggr. | Caprifoliaceae   | s pop JK  | Baldrian       | syst. CAR | p. 328             | Herzschwäche                                                                                                                                                                               |
| <i>Valeriana officinalis</i> aggr. | Caprifoliaceae   | s pop JK  | Baldrian       | syst. EYE | p. 328             | schwachen Augen                                                                                                                                                                            |
| <i>Valeriana officinalis</i> aggr. | Caprifoliaceae   | s pop JK  | Baldrian       | syst. GAS | p. 328             | reint Leber, Milz und Galle                                                                                                                                                                |
| <i>Valeriana officinalis</i> aggr. | Caprifoliaceae   | s pop JK  | Baldrian       | top. NER  | p. 328             | vertreibt Kopfschmerzen                                                                                                                                                                    |
| <i>Valeriana officinalis</i> aggr. | Caprifoliaceae   | s pop JK  | Baldrian       | syst. NER | p. 328             | bei allen nervösen Leiden                                                                                                                                                                  |
| <i>Valeriana officinalis</i> aggr. | Caprifoliaceae   | s pop JK  | Baldrian       | syst. RES | p. 328             | Verschleimung und Atembeschwerden                                                                                                                                                          |
| <i>Valeriana officinalis</i> aggr. | Caprifoliaceae   | s pop JK  | Baldrian       | top. SKE  | p. 328             | Gicht                                                                                                                                                                                      |
| <i>Valeriana officinalis</i> aggr. | Caprifoliaceae   | s pop JK  | Baldrian       | top. URO  | p. 328             | Blasensteinen                                                                                                                                                                              |
| <i>Valeriana officinalis</i> aggr. | Caprifoliaceae   | s pop JK  | Baldrian       | syst. URO | p. 328             | treibt den Urin; führt sogar den Stein aus                                                                                                                                                 |
| <i>Valeriana officinalis</i> aggr. | Caprifoliaceae   | s pop KN  | Baldrian       | syst. CAR | p. 460             | werden Zustände von Herzzunruhe mit Herzklopfen Baldriantee beeinflusst das Nervensystem; Verwendung als                                                                                   |
| <i>Valeriana officinalis</i> aggr. | Caprifoliaceae   | s pop KN  | Baldrian       | syst. NER | p. 460             | Schlafmittel                                                                                                                                                                               |
| <i>Valeriana officinalis</i> aggr. | Caprifoliaceae   | s pop KN  | Baldrian       | syst. NER | p. 460             | Schlafmittel                                                                                                                                                                               |
| <i>Valeriana officinalis</i> aggr. | Caprifoliaceae   | s pop KN  | Baldrian       | syst. NER | p. 460             | ausscheidet                                                                                                                                                                                |
| <i>Valeriana officinalis</i> aggr. | Caprifoliaceae   | s pop UB  | Baldrian       | syst. NER | p. 419             | Nervöse Erregungs- und Unruhezustände                                                                                                                                                      |
| <i>Valeriana officinalis</i> aggr. | Caprifoliaceae   | s pop UB  | Baldrian       | syst. NER | p. 419             | Nervöse Erregungs- und Unruhezustände                                                                                                                                                      |
| <i>Valeriana officinalis</i> aggr. | Caprifoliaceae   | s pop UB  | Baldrian       | top. NER  | p. 419             | Nervöse Erregungs- und Unruhezustände                                                                                                                                                      |
| <i>Valeriana officinalis</i> aggr. | Caprifoliaceae   | sci EMA   | Baldrian       | syst. NER | IMPC/340779/2005   | mental relaxation and normal sleep                                                                                                                                                         |
| <i>Valeriana officinalis</i> aggr. | Caprifoliaceae   | sci EMA   | Baldrian       | syst. NER | IMPC/340779/2005   | mental relaxation and normal sleep                                                                                                                                                         |
| <i>Valeriana officinalis</i> aggr. | Caprifoliaceae   | sci EMA   | Baldrian       | syst. NER | IMPC/340779/2005   | mental relaxation and normal sleep                                                                                                                                                         |
| <i>Valeriana officinalis</i> aggr. | Caprifoliaceae   | sci WI    | Baldrian       | syst. NER | p. 604             | sedierende Wirkung                                                                                                                                                                         |
| <i>Veratrum album</i> aggr.        | Melanthiaceae    | ant DIOS  | Weisser Germer | n.d. EYE  | 249                | Er wird auch den Kollyrien zugesetzt, welche die Verdunkelungen von den Augen zu vertreiben vermögen                                                                                       |
| <i>Veratrum album</i> aggr.        | Melanthiaceae    | ant DIOS  | Weisser Germer | syst. GYN | 249                | Ferner befördert er die Menstruation, tötet, im Zäpfchen eingelegt,                                                                                                                        |
| <i>Veratrum album</i> aggr.        | Melanthiaceae    | ant DIOS  | Weisser Germer | syst. HUM | 249                | den Embryo                                                                                                                                                                                 |
| <i>Veratrum album</i> aggr.        | Melanthiaceae    | ant DIOS  | Weisser Germer | syst. HUM | 249                | Er reinigt durch Erbrechen                                                                                                                                                                 |
| <i>Veratrum album</i> aggr.        | Melanthiaceae    | ant DIOS  | Weisser Germer | n.d. OTH  | 249                | Auch die aus ihm gefertigten Zäpfchen, mit Essig dem After                                                                                                                                 |
| <i>Veratrum album</i> aggr.        | Melanthiaceae    | ant DIOS  | Weisser Germer | n.d. OTH  | 249                | eingeführt, bewirken Erbrechen                                                                                                                                                             |
| <i>Veratrum album</i> aggr.        | Melanthiaceae    | ant DIOS  | Weisser Germer | n.d. OTH  | 249                | erregt Niesen                                                                                                                                                                              |
| <i>Veratrum album</i> aggr.        | Melanthiaceae    | mon HvB   | Germer         | top. CAR  | 1-130              | leidet                                                                                                                                                                                     |
| <i>Veratrum album</i> aggr.        | Melanthiaceae    | mon HvB   | Germer         | top. GYN  | 1-130              | Und ein junges Mädchen, dem der Monatsfluss zur rechten Zeit                                                                                                                               |
| <i>Veratrum album</i> aggr.        | Melanthiaceae    | mon HvB   | Germer         | top. NER  | 1-130              | ausbleibt                                                                                                                                                                                  |
| <i>Veratrum album</i> aggr.        | Melanthiaceae    | mon HvB   | Germer         | top. NER  | 1-130              | verwirrt                                                                                                                                                                                   |
| <i>Veratrum album</i> aggr.        | Melanthiaceae    | ren LF    | Germer         | syst. CAR | CLI / CIIII        | Wahnsinn, Mense, Schlaf, Appetit, Wassersucht                                                                                                                                              |
| <i>Veratrum album</i> aggr.        | Melanthiaceae    | ren LF    | Germer         | syst. DER | CLI / CIIII        | wassersucht                                                                                                                                                                                |
| <i>Veratrum album</i> aggr.        | Melanthiaceae    | ren LF    | Germer         | syst. DER | CLI / CIIII        | aussetzt                                                                                                                                                                                   |
| <i>Veratrum album</i> aggr.        | Melanthiaceae    | ren LF    | Germer         | top. DER  | CLI / CIIII        | geflechten, rauden unnd allerley unreynigkayt die sich aufwendig am leib erzeygt / Die wurtzeit würt auch zu den geschwaeren grinden und alten schaden dieselben darmit zu reynigen un     |
| <i>Veratrum album</i> aggr.        | Melanthiaceae    | ren LF    | Germer         | top. EYE  | CLI / CIIII        | seubern                                                                                                                                                                                    |
| <i>Veratrum album</i> aggr.        | Melanthiaceae    | ren LF    | Germer         | top. EYE  | CLI / CIIII        | zu den artzneyen darmit man die augen klar und lauter macht                                                                                                                                |
| <i>Veratrum album</i> aggr.        | Melanthiaceae    | ren LF    | Germer         | syst. GAS | CLI / CIIII        | macht speien und treibt mit grossem gewalt mancherley                                                                                                                                      |
| <i>Veratrum album</i> aggr.        | Melanthiaceae    | ren LF    | Germer         | syst. GAS | CLI / CIIII        | feuchtigkayt oben hinaus durch das undewen                                                                                                                                                 |
| <i>Veratrum album</i> aggr.        | Melanthiaceae    | ren LF    | Germer         | syst. GAS | CLI / CIIII        | macht speien                                                                                                                                                                               |
| <i>Veratrum album</i> aggr.        | Melanthiaceae    | ren LF    | Germer         | syst. GAS | CLI / CIIII        | treibt dieser rettich zu dem stulgang                                                                                                                                                      |
| <i>Veratrum album</i> aggr.        | Melanthiaceae    | ren LF    | Germer         | top. GYN  | CLI / CIIII        | bringt den frauen ire zeit                                                                                                                                                                 |
| <i>Veratrum album</i> aggr.        | Melanthiaceae    | ren LF    | Germer         | top. HUM  | CLI / CIIII        | in die nasen gethon reynigt das hirn und macht niesen                                                                                                                                      |
| <i>Veratrum album</i> aggr.        | Melanthiaceae    | ren LF    | Germer         | syst. NER | CLI / CIIII        | die fallende sucht, schwindel, unsinnigkayt, . . . , krampf                                                                                                                                |
| <i>Veratrum album</i> aggr.        | Melanthiaceae    | ren LF    | Germer         | n.d. OTH  | CLI / CIIII        | ist gut die ratten, meuss und dergleichen unzifer zu toetien und                                                                                                                           |
| <i>Veratrum album</i> aggr.        | Melanthiaceae    | ren LF    | Germer         | syst. SKE | CLI / CIIII        | vertreiben / und den mucken fürgesetzt                                                                                                                                                     |
| <i>Veratrum album</i> aggr.        | Melanthiaceae    | ren LF    | Germer         | syst. SKE | CLI / CIIII        | hufwe                                                                                                                                                                                      |
| <i>Veratrum album</i> aggr.        | Melanthiaceae    | ren LF    | Germer         | top. TEE  | CLI / CIIII        | so legen sie den weestagen [der zeen]                                                                                                                                                      |
| <i>Veratrum album</i> aggr.        | Melanthiaceae    | s pop VAL | Germer         | syst. CAR | p. 250             | Palpitations de la maladie de Basedow, hypertension artérielle                                                                                                                             |
| <i>Veratrum album</i> aggr.        | Melanthiaceae    | s pop VAL | Germer         | top. CAR  | p. 250             | Palpitations                                                                                                                                                                               |
| <i>Veratrum album</i> aggr.        | Melanthiaceae    | s pop VAL | Germer         | top. SKE  | p. 250             | analgésique da la goutte                                                                                                                                                                   |
| <i>Verbasum thapsus</i> aggr.      | Scrophulariaceae | ant DIOS  | Königskerze    | top. ANT  | 239                | helfen auch gegen Skorpionsbisse                                                                                                                                                           |
| <i>Verbasum thapsus</i> aggr.      | Scrophulariaceae | ant DIOS  | Königskerze    | top. ANT  | 239                | helfen auch gegen Skorpionsbisse                                                                                                                                                           |
| <i>Verbasum thapsus</i> aggr.      | Scrophulariaceae | ant DIOS  | Königskerze    | top. ANT  | 239                | Kataplasma gegen Oedeme; und mit Honig oder Wein gegen brandige Geschwüre. . . . werden als Umschlag bei                                                                                   |
| <i>Verbasum thapsus</i> aggr.      | Scrophulariaceae | ant DIOS  | Königskerze    | top. DER  | 239                | Verbrennungen gebraucht                                                                                                                                                                    |
| <i>Verbasum thapsus</i> aggr.      | Scrophulariaceae | ant DIOS  | Königskerze    | top. DER  | 239                | Wunden                                                                                                                                                                                     |
| <i>Verbasum thapsus</i> aggr.      | Scrophulariaceae | ant DIOS  | Königskerze    | top. EYE  | 239                | Augenentzündungen                                                                                                                                                                          |
| <i>Verbasum thapsus</i> aggr.      | Scrophulariaceae | ant DIOS  | Königskerze    | syst. GAS | 239                | Die Wurzel der beiden ersten genannten Arten ist adstringierend; deshalb wird sie den an Durchfall Leidenden in der Grösse eines Würfels mit Wein vorthellhaft zu trinken gegeben; inneren |
| <i>Verbasum thapsus</i> aggr.      | Scrophulariaceae | ant DIOS  | Königskerze    | syst. GAS | 239                | Rupturen, Krämpfen                                                                                                                                                                         |
| <i>Verbasum thapsus</i> aggr.      | Scrophulariaceae | ant DIOS  | Königskerze    | n.d. OTH  | 239                | farbt die Haare                                                                                                                                                                            |
| <i>Verbasum thapsus</i> aggr.      | Scrophulariaceae | ant DIOS  | Königskerze    | syst. RES | 239                | chronischem Husten                                                                                                                                                                         |
| <i>Verbasum thapsus</i> aggr.      | Scrophulariaceae | ant DIOS  | Königskerze    | syst. SKE | 239                | Quetschungen                                                                                                                                                                               |
| <i>Verbasum thapsus</i> aggr.      | Scrophulariaceae | ant DIOS  | Königskerze    | top. TEE  | 239                | Mundspülwasser, lindert sie Zahnschmerzen                                                                                                                                                  |
| <i>Verbasum thapsus</i> aggr.      | Scrophulariaceae | mon HvB   | Königskerze    | syst. CAR | 1-123              | schwaches und trauriges Herz . . . Es stärkt sein Herz und macht es fröhlich                                                                                                               |
| <i>Verbasum thapsus</i> aggr.      | Scrophulariaceae | mon HvB   | Königskerze    | syst. RES | 1-123              | in Stimme und Kehle heiser, in der Brust Schmerzen                                                                                                                                         |
| <i>Verbasum thapsus</i> aggr.      | Scrophulariaceae | ren LF    | Königskerze    | syst. ANT | OXVIII / CCCXXVIII | gut denen so von einem Scorpion gestochen sind                                                                                                                                             |
| <i>Verbasum thapsus</i> aggr.      | Scrophulariaceae | ren LF    | Königskerze    | top. ANT  | OXVIII / CCCXXVIII | seind auch gut denen so von einem Scorpion gestochen sind                                                                                                                                  |
| <i>Verbasum thapsus</i> aggr.      | Scrophulariaceae | ren LF    | Königskerze    | top. DER  | OXVIII / CCCXXVIII | machen schoen har                                                                                                                                                                          |
| <i>Verbasum thapsus</i> aggr.      | Scrophulariaceae | ren LF    | Königskerze    | top. DER  | OXVIII / CCCXXVIII | in die geschwaer und wunden gethon heylen sie dieselben                                                                                                                                    |
| <i>Verbasum thapsus</i> aggr.      | Scrophulariaceae | ren LF    | Königskerze    | top. DER  | OXVIII / CCCXXVIII | verzeren die kalte geschwulst und andere beulen                                                                                                                                            |
| <i>Verbasum thapsus</i> aggr.      | Scrophulariaceae | ren LF    | Königskerze    | top. DER  | OXVIII / CCCXXVIII | heylen den brandt                                                                                                                                                                          |
| <i>Verbasum thapsus</i> aggr.      | Scrophulariaceae | ren LF    | Königskerze    | syst. DER | OXVIII / CCCXXVIII | so ziehen sie doern und spreissel auss dem leib                                                                                                                                            |
| <i>Verbasum thapsus</i> aggr.      | Scrophulariaceae | ren LF    | Königskerze    | syst. GAS | OXVIII / CCCXXVIII | stellt den bauchfluss                                                                                                                                                                      |
| <i>Verbasum thapsus</i> aggr.      | Scrophulariaceae | ren LF    | Königskerze    | OTH       | OXVIII / CCCXXVIII | wan man feygen über ein jar unversert behalten will                                                                                                                                        |
| <i>Verbasum thapsus</i> aggr.      | Scrophulariaceae | ren LF    | Königskerze    | syst. RES | OXVIII / CCCXXVIII | nützlich . . . Zu allerley gebresten der brust                                                                                                                                             |
| <i>Verbasum thapsus</i> aggr.      | Scrophulariaceae | ren LF    | Königskerze    | syst. RES | OXVIII / CCCXXVIII | item dem langwierigen husten                                                                                                                                                               |
| <i>Verbasum thapsus</i> aggr.      | Scrophulariaceae | ren LF    | Königskerze    | syst. SKE | OXVIII / CCCXXVIII | ist gut denen die glider auseinander sind                                                                                                                                                  |
| <i>Verbasum thapsus</i> aggr.      | Scrophulariaceae | ren LF    | Königskerze    | syst. SKE | OXVIII / CCCXXVIII | bekompt sie wohl den gebrochen unnd denen so ettwas im leib                                                                                                                                |
| <i>Verbasum thapsus</i> aggr.      | Scrophulariaceae | ren LF    | Königskerze    | syst. SKE | OXVIII / CCCXXVIII | zerissen und zerknitschet ist                                                                                                                                                              |
| <i>Verbasum thapsus</i> aggr.      | Scrophulariaceae | s pop BVA | Königskerze    | top. TEE  | OXVIII / CCCXXVIII | im mund warm gehalten lindert die schmerzen der zaen                                                                                                                                       |
| <i>Verbasum thapsus</i> aggr.      | Scrophulariaceae | s pop BVA | Königskerze    | top. DER  | p. 125             | Hämorrhoidenknotten, Afterjucken                                                                                                                                                           |
| <i>Verbasum thapsus</i> aggr.      | Scrophulariaceae | s pop BVA | Königskerze    | top. NER  | p. 125             | Neuralgien                                                                                                                                                                                 |
| <i>Verbasum thapsus</i> aggr.      | Scrophulariaceae | s pop BVA | Königskerze    | syst. RES | p. 125             | Heiserkeit, Kehlkopfkatarrh, Husten, Bronchitis                                                                                                                                            |
| <i>Verbasum thapsus</i> aggr.      | Scrophulariaceae | s pop BVA | Königskerze    | syst. RES | p. 125             | Heiserkeit, Kehlkopfkatarrh, Husten, Bronchitis                                                                                                                                            |
| <i>Verbasum thapsus</i> aggr.      | Scrophulariaceae | s pop JK  | Königskerze    | top. DER  | p. 384             | Ausschlägen, Geschwüren, Hämorrhoiden                                                                                                                                                      |
| <i>Verbasum thapsus</i> aggr.      | Scrophulariaceae | s pop JK  | Königskerze    | syst. GAS | p. 384             | Gelbsucht                                                                                                                                                                                  |

|                                |               |           |                   |           |                                                                                                                                                                                                                                    |
|--------------------------------|---------------|-----------|-------------------|-----------|------------------------------------------------------------------------------------------------------------------------------------------------------------------------------------------------------------------------------------|
| <i>Verbascum thapsus</i> aggr. | Scrophulariac | s pop JK  | Königskerze       | svst. RES | p. 384 Brust- und Lungenleiden                                                                                                                                                                                                     |
| <i>Verbascum thapsus</i> aggr. | Scrophulariac | s pop JK  | Königskerze       | svst. URO | p. 384 mühsames Wasserlösen                                                                                                                                                                                                        |
| <i>Verbascum thapsus</i> aggr. | Scrophulariac | s pop KN  | Königskerze       | top DER   | p. 492 Gurgelwasser                                                                                                                                                                                                                |
| <i>Verbascum thapsus</i> aggr. | Scrophulariac | s pop KN  | Königskerze       | svst. RES | p. 492 Husten, Katarhe                                                                                                                                                                                                             |
| <i>Verbascum thapsus</i> aggr. | Scrophulariac | s pop UB  | Königskerze       | syst RES  | p. 213 unproduktiver Reizhusten                                                                                                                                                                                                    |
| <i>Verbascum thapsus</i> aggr. | Scrophulariac | s pop WI  | Königskerze       | top DER   | p. 609 Volksmedizin: Wundbehandlung                                                                                                                                                                                                |
| <i>Verbascum thapsus</i> aggr. | Scrophulariac | s pop WI  | Königskerze       | syst SKE  | p. 609 Volksmedizin: Antirheumatikum                                                                                                                                                                                               |
| <i>Verbascum thapsus</i> aggr. | Scrophulariac | sci EMA   | Königskerze       | syst RES  | IMPC/395213/2007 sore throat associated with dry cough and cold.                                                                                                                                                                   |
| <i>Verbena officinalis</i> L.  | Verbenaceae   | ant DIOS  | Eisenkraut        | syst. ANT | p. 226 Den am dreitägigen Fieber Leidenden wird von der Erde an der                                                                                                                                                                |
| <i>Verbena officinalis</i> L.  | Verbenaceae   | ant DIOS  | Eisenkraut        | top DER   | p. 226 lindert es roseartige Entzündungen und heilt faulige Geschwüre; ferner verklebt es Wunden und bringt alte mit Honig zur Vernarbung                                                                                          |
| <i>Verbena officinalis</i> L.  | Verbenaceae   | ant DIOS  | Eisenkraut        | top DER   | p. 226 Langwierige Oedeme und Entzündungen heilen sie als Umschlag, reinigen auch schmutzige Geschwüre                                                                                                                             |
| <i>Verbena officinalis</i> L.  | Verbenaceae   | ant DIOS  | Eisenkraut        | top DER   | p. 226 Langwierige Oedeme und Entzündungen heilen sie als Umschlag, reinigen auch schmutzige Geschwüre; Die ganze Pflanze mit Wein gekocht reist den Schorf auf Mandelgeschwüren ringsum auf                                       |
| <i>Verbena officinalis</i> L.  | Verbenaceae   | ant DIOS  | Eisenkraut        | top DER   | p. 226 und heilt als Gurgelmittel fressende Geschwüre im Munde.                                                                                                                                                                    |
| <i>Verbena officinalis</i> L.  | Verbenaceae   | ant DIOS  | Eisenkraut        | syst FEV  | p. 226 Den am dreitägigen Fieber Leidenden wird von der Erde an der dritte Knoten mit den daran stehenden Blättern zu trinken                                                                                                      |
| <i>Verbena officinalis</i> L.  | Verbenaceae   | ant DIOS  | Eisenkraut        | syst GAS  | p. 226 Bei Gelbsucht werden die Blätter zu 1 Dachme                                                                                                                                                                                |
| <i>Verbena officinalis</i> L.  | Verbenaceae   | ant DIOS  | Eisenkraut        | top GYN   | p. 226 als Zäpfchen eingelegt die Schmerzen der Gebärmutter vertreiben                                                                                                                                                             |
| <i>Verbena officinalis</i> L.  | Verbenaceae   | ant DIOS  | Eisenkraut        | other OTH | p. 226 Man nennt diese Pflanze die heilige, weil sie bei den Sühneopfern als Amulett sehr im Gebrauch ist.                                                                                                                         |
| <i>Verbena officinalis</i> L.  | Verbenaceae   | mon HvB   | Eisenkraut        | top DER   | 1-154 wenn infolge von Geschwüren oder Würmern fauliges Fleisch im Menschen ist, faulige Wunden                                                                                                                                    |
| <i>Verbena officinalis</i> L.  | Verbenaceae   | mon HvB   | Eisenkraut        | top RES   | 1-154 Kehle anschwillt.                                                                                                                                                                                                            |
| <i>Verbena officinalis</i> L.  | Verbenaceae   | mon MF    | Eisenkraut        | syst. ANT | 58 Wunde, widersetzt sich sämtlichen Giften                                                                                                                                                                                        |
| <i>Verbena officinalis</i> L.  | Verbenaceae   | mon MF    | Eisenkraut        | top DER   | 58 verderbliche Bisse                                                                                                                                                                                                              |
| <i>Verbena officinalis</i> L.  | Verbenaceae   | mon MF    | Eisenkraut        | top DER   | 58 heilt Wunden in der Mundhöhle                                                                                                                                                                                                   |
| <i>Verbena officinalis</i> L.  | Verbenaceae   | mon MF    | Eisenkraut        | top DER   | 58 Mumps                                                                                                                                                                                                                           |
| <i>Verbena officinalis</i> L.  | Verbenaceae   | mon MF    | Eisenkraut        | syst. FEV | 58 Wechselieber                                                                                                                                                                                                                    |
| <i>Verbena officinalis</i> L.  | Verbenaceae   | mon MF    | Eisenkraut        | syst GAS  | 58 heilsam für alle eingeweide, für Seiten- und Rippenfellschmerzen, Beschwerden der Leber                                                                                                                                         |
| <i>Verbena officinalis</i> L.  | Verbenaceae   | mon MF    | Eisenkraut        | syst GAS  | 58 nutzt den Gelbsuchtigen                                                                                                                                                                                                         |
| <i>Verbena officinalis</i> L.  | Verbenaceae   | mon MF    | Eisenkraut        | vd. NER   | 58 soll sie allesamt heiteren Sinnes machen                                                                                                                                                                                        |
| <i>Verbena officinalis</i> L.  | Verbenaceae   | mon MF    | Eisenkraut        | other OTH | 58 Kranz bringt schnelle Heilung                                                                                                                                                                                                   |
| <i>Verbena officinalis</i> L.  | Verbenaceae   | mon MF    | Eisenkraut        | other OTH | 58 Orakel                                                                                                                                                                                                                          |
| <i>Verbena officinalis</i> L.  | Verbenaceae   | mon MF    | Eisenkraut        | syst RES  | 58 Leiden der Brust, Lungenkrankheiten und Schwindsucht                                                                                                                                                                            |
| <i>Verbena officinalis</i> L.  | Verbenaceae   | mon MF    | Eisenkraut        | top RES   | 58 Eiterfaule im Mund                                                                                                                                                                                                              |
| <i>Verbena officinalis</i> L.  | Verbenaceae   | mon MF    | Eisenkraut        | syst URO  | 58 Steinleidenden                                                                                                                                                                                                                  |
| <i>Verbena officinalis</i> L.  | Verbenaceae   | ren LF    | Eisenkraut        | top ANT   | CCXXXVII / CCXXVI seind trefflich gut wider allerley giftige thier                                                                                                                                                                 |
| <i>Verbena officinalis</i> L.  | Verbenaceae   | ren LF    | Eisenkraut        | syst DER  | CCXXXVII / CCXXVI die newlich mit dem aussatz seind überfallen worden lindern sie die hitzige geschwulst / reynigen auch unnd seubern die unreynen schaden / heylet die mundeule und die geschwaer des munds, die umb sich fressen |
| <i>Verbena officinalis</i> L.  | Verbenaceae   | ren LF    | Eisenkraut        | top DER   | CCXXXVII / CCXXVI gut zu dem rotlauff / heylen auch die faulen unnd unreynen schaden / desgleichen auch die frischen wunden unnd die alten                                                                                         |
| <i>Verbena officinalis</i> L.  | Verbenaceae   | ren LF    | Eisenkraut        | top DER   | CCXXXVII / CCXXVI mit honig vermischt                                                                                                                                                                                              |
| <i>Verbena officinalis</i> L.  | Verbenaceae   | ren LF    | Eisenkraut        | top DER   | CCXXXVII / CCXXVI seind trefflich gut wider allerley giftige thier                                                                                                                                                                 |
| <i>Verbena officinalis</i> L.  | Verbenaceae   | ren LF    | Eisenkraut        | syst GAS  | CCXXXVII / CCXXVI haben den so die roten rühr                                                                                                                                                                                      |
| <i>Verbena officinalis</i> L.  | Verbenaceae   | ren LF    | Eisenkraut        | syst GAS  | CCXXXVII / CCXXVI heilen die schmerzen der muter                                                                                                                                                                                   |
| <i>Verbena officinalis</i> L.  | Verbenaceae   | ren LF    | Eisenkraut        | syst GAS  | CCXXXVII / CCXXVI wider das armen der darm                                                                                                                                                                                         |
| <i>Verbena officinalis</i> L.  | Verbenaceae   | ren LF    | Eisenkraut        | top GYN   | CCXXXVII / CCXXVI leiten die schmerzen der muter                                                                                                                                                                                   |
| <i>Verbena officinalis</i> L.  | Verbenaceae   | ren LF    | Eisenkraut        | syst NER  | CCXXXVII / CCXXVI ist nützlich denen so mit dem fallenden siechtagen beladen seind                                                                                                                                                 |
| <i>Verbena officinalis</i> L.  | Verbenaceae   | ren LF    | Eisenkraut        | top NER   | CCXXXVII / CCXXVI gut zu den weetagen des haupts                                                                                                                                                                                   |
| <i>Verbena officinalis</i> L.  | Verbenaceae   | ren LF    | Eisenkraut        | top NER   | CCXXXVII / CCXXVI verhueten auch das einem die har nit aussfallen                                                                                                                                                                  |
| <i>Verbena officinalis</i> L.  | Verbenaceae   | ren LF    | Eisenkraut        | top NER   | CCXXXVII / CCXXVI gut zu den weetagen des haupts                                                                                                                                                                                   |
| <i>Verbena officinalis</i> L.  | Verbenaceae   | ren LF    | Eisenkraut        | OTH       | CCXXXVII / CCXXVI gest froelich machen                                                                                                                                                                                             |
| <i>Verbena officinalis</i> L.  | Verbenaceae   | ren LF    | Eisenkraut        | top SKE   | CCXXXVII / CCXXVI podagram, weetagen der hufft und die wunden mildert die weetage der zaen, macht dieseligen fest unnd steiff                                                                                                      |
| <i>Verbena officinalis</i> L.  | Verbenaceae   | ren LF    | Eisenkraut        | top TEE   | CCXXXVII / CCXXVI und heylet die geschwaer des munds                                                                                                                                                                               |
| <i>Verbena officinalis</i> L.  | Verbenaceae   | ren LF    | Eisenkraut        | syst URO  | CCXXXVII / CCXXVI es treibt auch den stein                                                                                                                                                                                         |
| <i>Verbena officinalis</i> L.  | Verbenaceae   | s pop JK  | Eisenkraut        | top DER   | p. 346 Hunden, Schlangen oder tollwütigen Menschen gebissen                                                                                                                                                                        |
| <i>Verbena officinalis</i> L.  | Verbenaceae   | s pop JK  | Eisenkraut        | top DER   | p. 346 Haarausfall                                                                                                                                                                                                                 |
| <i>Verbena officinalis</i> L.  | Verbenaceae   | s pop JK  | Eisenkraut        | top DER   | p. 346 Hundebiss und Frostbeulen, böse Flechten                                                                                                                                                                                    |
| <i>Verbena officinalis</i> L.  | Verbenaceae   | s pop JK  | Eisenkraut        | top DER   | p. 346 austretendem Mastdarm, aussere Geschwülste                                                                                                                                                                                  |
| <i>Verbena officinalis</i> L.  | Verbenaceae   | s pop JK  | Eisenkraut        | top DER   | p. 346 Zahnweh, Mundfaule, entzündetem Zahnfleisch, Heiserkeit und                                                                                                                                                                 |
| <i>Verbena officinalis</i> L.  | Verbenaceae   | s pop JK  | Eisenkraut        | top EAR   | p. 346 Ohrenweh                                                                                                                                                                                                                    |
| <i>Verbena officinalis</i> L.  | Verbenaceae   | s pop JK  | Eisenkraut        | top EYE   | p. 346 Augenweh, triefenden Augen, benimmt das Flimmern und macht klare Augen                                                                                                                                                      |
| <i>Verbena officinalis</i> L.  | Verbenaceae   | s pop JK  | Eisenkraut        | syst GAS  | p. 346 Gelbsucht, Gallensteine                                                                                                                                                                                                     |
| <i>Verbena officinalis</i> L.  | Verbenaceae   | s pop JK  | Eisenkraut        | top GAS   | p. 346 Gallenleiden                                                                                                                                                                                                                |
| <i>Verbena officinalis</i> L.  | Verbenaceae   | s pop JK  | Eisenkraut        | syst NER  | p. 346 Nervenschmerzen, Fallend Weh                                                                                                                                                                                                |
| <i>Verbena officinalis</i> L.  | Verbenaceae   | s pop JK  | Eisenkraut        | top NER   | p. 346 stillt sinnliche Erregungszustände                                                                                                                                                                                          |
| <i>Verbena officinalis</i> L.  | Verbenaceae   | s pop JK  | Eisenkraut        | top NER   | p. 346 Kopfschmerzen, Nervenschmerzen                                                                                                                                                                                              |
| <i>Verbena officinalis</i> L.  | Verbenaceae   | s pop JK  | Eisenkraut        | syst RES  | Gebrechen des Kopfes, die von Verkältungen her kommen,                                                                                                                                                                             |
| <i>Verbena officinalis</i> L.  | Verbenaceae   | s pop JK  | Eisenkraut        | top SKE   | p. 346 Lungenaffektionen, Husten, Lungenleiden, Astmah, Grippe                                                                                                                                                                     |
| <i>Verbena officinalis</i> L.  | Verbenaceae   | s pop JK  | Eisenkraut        | top TEE   | p. 346 Ischias und Rheumatismus                                                                                                                                                                                                    |
| <i>Verbena officinalis</i> L.  | Verbenaceae   | s pop JK  | Eisenkraut        | syst URO  | p. 346 Zahnweh                                                                                                                                                                                                                     |
| <i>Verbena officinalis</i> L.  | Verbenaceae   | s pop JK  | Eisenkraut        | top URO   | p. 346 Nieren- Blasensteine                                                                                                                                                                                                        |
| <i>Verbena officinalis</i> L.  | Verbenaceae   | s pop UB  | Eisenkraut        | syst CAR  | p. 376 funktionelle Herzbeschwerden                                                                                                                                                                                                |
| <i>Verbena officinalis</i> L.  | Verbenaceae   | s pop WI  | Eisenkraut        | syst GYN  | p. 612 Volksmedizin: Gebärgewürm                                                                                                                                                                                                   |
| <i>Verbena officinalis</i> L.  | Verbenaceae   | s pop WI  | Eisenkraut        | syst SKE  | p. 612 Volksmedizin: Antirheumatikum                                                                                                                                                                                               |
| <i>Vinca minor</i> L.          | Apocynaceae   | ant DIOS  | Immergrün         | syst. ANT | p. 214 die von der Aspischlange Gebissenen heilen                                                                                                                                                                                  |
| <i>Vinca minor</i> L.          | Apocynaceae   | ant DIOS  | Immergrün         | top ANT   | p. 214 helfen aufgelöst beim Biss giftiger Thiere                                                                                                                                                                                  |
| <i>Vinca minor</i> L.          | Apocynaceae   | ant DIOS  | Immergrün         | syst GAS  | p. 214 Ihre Blätter und Stengel, mit Wein getrunken, beschwichtigen mit Milch und Rosen- oder Cypergrassalbe in Zäpfchen eingelegt                                                                                                 |
| <i>Vinca minor</i> L.          | Apocynaceae   | ant DIOS  | Immergrün         | top GYN   | p. 214 helen sie Gebärmutterleiden                                                                                                                                                                                                 |
| <i>Vinca minor</i> L.          | Apocynaceae   | ant DIOS  | Immergrün         | top TEE   | p. 214 Zahnschmerzen                                                                                                                                                                                                               |
| <i>Vinca minor</i> L.          | Apocynaceae   | mon LO    | Immergrün         | n.d. OTH  | n.d. n.d.                                                                                                                                                                                                                          |
| <i>Vinca minor</i> L.          | Apocynaceae   | ren LF    | Immergrün         | syst DER  | CCIII / CXXXV stellt das bluten der nasen                                                                                                                                                                                          |
| <i>Vinca minor</i> L.          | Apocynaceae   | ren LF    | Immergrün         | syst DER  | CCIII / CXXXV ist firtzrefflich gut denen so blut speien oder ausspürzten                                                                                                                                                          |
| <i>Vinca minor</i> L.          | Apocynaceae   | ren LF    | Immergrün         | top DER   | CCIII / CXXXV heylet es dieseligen [biss der giftigen thier]                                                                                                                                                                       |
| <i>Vinca minor</i> L.          | Apocynaceae   | ren LF    | Immergrün         | syst GAS  | CCIII / CXXXV stellet den bauchfluss und die roten rühr                                                                                                                                                                            |
| <i>Vinca minor</i> L.          | Apocynaceae   | ren LF    | Immergrün         | top GYN   | CCIII / CXXXV legt den schmerzen derselbigen [muter]                                                                                                                                                                               |
| <i>Vinca minor</i> L.          | Apocynaceae   | ren LF    | Immergrün         | top TEE   | CCIII / CXXXV so legt des den schmerzen der zaen                                                                                                                                                                                   |
| <i>Vinca minor</i> L.          | Apocynaceae   | s pop BVA | Kleines Immergrün | syst CAR  | p. 107 Arteriosklerose, Alterserscheinungen als Geriatricum, zerebralen Durchblutungsstörungen, Durchblutungsstörungen im Gehirn, Augen und Innenohr, Schwindel, Konzentrationsschwäche,                                           |
| <i>Vinca minor</i> L.          | Apocynaceae   | s pop BVA | Kleines Immergrün | syst CAR  | p. 107 Arteriosklerose, Alterserscheinungen als Geriatricum, zerebralen Durchblutungsstörungen, Durchblutungsstörungen im Gehirn, Augen und Innenohr, Schwindel, Konzentrationsschwäche,                                           |
| <i>Vinca minor</i> L.          | Apocynaceae   | s pop BVA | Kleines Immergrün | syst EAR  | p. 107 Ohrensausen, Altersschwerhörigkeit, Durchblutungsstörungen im Innenohr                                                                                                                                                      |

|                             |             |       |       |                    |      |     |                                                                                |
|-----------------------------|-------------|-------|-------|--------------------|------|-----|--------------------------------------------------------------------------------|
| <i>Vinca minor</i> L.       | Apocynaceae | s pop | BVA   | Kleines Immergrün  | syst | EAR | p. 107. Innerehr.                                                              |
| <i>Vinca minor</i> L.       | Apocynaceae | s pop | BVA   | Kleines Immergrün  | syst | EYE | p. 107. Durchblutungsstörungen im Auge                                         |
| <i>Vinca minor</i> L.       | Apocynaceae | s pop | BVA   | Kleines Immergrün  | syst | EYE | p. 107. Durchblutungsstörungen im Auge                                         |
| <i>Viola hirta</i> aggr.    | Violaceae   | ant   | DIOS  | Veilchen           | syst | EYE | p. 243 bei Augenentzündung                                                     |
| <i>Viola hirta</i> aggr.    | Violaceae   | ant   | DIOS  | Veilchen           | top  | EYE | p. 243 bei Augenentzündung                                                     |
| <i>Viola hirta</i> aggr.    | Violaceae   | ant   | DIOS  | Veilchen           | syst | GAS | p. 243 Erhitzung des Magens, [bei Augenentzündung] und Mastdarmvorfall.        |
| <i>Viola hirta</i> aggr.    | Violaceae   | ant   | DIOS  | Veilchen           | top  | GAS | p. 243 Erhitzung des Magens, bei [Augenentzündung] und Mastdarmvorfall.        |
| <i>Viola hirta</i> aggr.    | Violaceae   | ant   | DIOS  | Veilchen           | syst | NER | p. 243 Epilepsie der Kinder                                                    |
| <i>Viola hirta</i> aggr.    | Violaceae   | ant   | DIOS  | Veilchen           | syst | SKE | p. 243 bei Schlundmuskelerkrankung                                             |
| <i>Viola hirta</i> aggr.    | Violaceae   | mon   | HvB   | Veilchen           | top  | DER | Wessen Fleisch die Krebse zerfressen, oder irgendwelche Geschwüre              |
| <i>Viola hirta</i> aggr.    | Violaceae   | mon   | HvB   | Veilchen           | top  | DER | 1-103 in seinem Körper                                                         |
| <i>Viola hirta</i> aggr.    | Violaceae   | mon   | HvB   | Veilchen           | top  | DER | 1-103 Krebs und andere Würmer den Menschen zerfressen                          |
| <i>Viola hirta</i> aggr.    | Violaceae   | mon   | HvB   | Veilchen           | top  | EYE | 1-103 vertreibt die Verdunkelung der Augen                                     |
| <i>Viola hirta</i> aggr.    | Violaceae   | mon   | HvB   | Veilchen           | top  | EYE | 1-103 feurige Augen und in ihnen verdunkelt ist                                |
| <i>Viola hirta</i> aggr.    | Violaceae   | mon   | HvB   | Veilchen           | syst | FEV | 1-103 dreitägiges Fieber                                                       |
| <i>Viola hirta</i> aggr.    | Violaceae   | mon   | HvB   | Veilchen           | top  | NER | 1-103 Kopfweg                                                                  |
| <i>Viola hirta</i> aggr.    | Violaceae   | mon   | HvB   | Veilchen           | top  | NER | Schwere im Kopf oder in den Nieren, oder der irgendwo von einer                |
| <i>Viola hirta</i> aggr.    | Violaceae   | mon   | MF    | Veilchen           | top  | DER | 1-103 Lähmung gelegt wird                                                      |
| <i>Viola hirta</i> aggr.    | Violaceae   | mon   | MF    | Veilchen           | top  | DER | 40 fressende Kopfgeschwüre heilen                                              |
| <i>Viola hirta</i> aggr.    | Violaceae   | mon   | MF    | Veilchen           | syst | DER | 40 Halsgeschwüre                                                               |
| <i>Viola hirta</i> aggr.    | Violaceae   | mon   | MF    | Veilchen           | top  | DER | 40 Blatterblaschen                                                             |
| <i>Viola hirta</i> aggr.    | Violaceae   | mon   | MF    | Veilchen           | top  | DER | 40 Schründen im After                                                          |
| <i>Viola hirta</i> aggr.    | Violaceae   | mon   | MF    | Veilchen           | top  | DER | Schuppen oder Kleie auf dem Kopf kannst du mit diesem Öl                       |
| <i>Viola hirta</i> aggr.    | Violaceae   | mon   | MF    | Veilchen           | top  | DER | 40 vertreiben.                                                                 |
| <i>Viola hirta</i> aggr.    | Violaceae   | mon   | MF    | Veilchen           | top  | DER | 40 lindert entzündete Körperstellen                                            |
| <i>Viola hirta</i> aggr.    | Violaceae   | mon   | MF    | Veilchen           | syst | DER | 40 stillt eine unregelmässig blutende Wunde                                    |
| <i>Viola hirta</i> aggr.    | Violaceae   | mon   | MF    | Veilchen           | top  | EAR | 40 hilft gegen Ohrenklingen und Schmerz                                        |
| <i>Viola hirta</i> aggr.    | Violaceae   | mon   | MF    | Veilchen           | top  | EYE | 40 entzündete Augen                                                            |
| <i>Viola hirta</i> aggr.    | Violaceae   | mon   | MF    | Veilchen           | syst | GAS | 40 tötet es Spulwürmer                                                         |
| <i>Viola hirta</i> aggr.    | Violaceae   | mon   | MF    | Veilchen           | top  | GYN | 40 Geschwulst der Gebärmutter                                                  |
| <i>Viola hirta</i> aggr.    | Violaceae   | mon   | MF    | Veilchen           | syst | GYN | 40 führen geordneten Monatsfluss herbei                                        |
| <i>Viola hirta</i> aggr.    | Violaceae   | mon   | MF    | Veilchen           | vol  | NER | 40 dem, der getrunken hat und nun am Rausch leidet                             |
| <i>Viola hirta</i> aggr.    | Violaceae   | mon   | MF    | Veilchen           | syst | NER | 40 fallsüchtige Knaben heilen                                                  |
| <i>Viola hirta</i> aggr.    | Violaceae   | mon   | MF    | Veilchen           | top  | NER | nützt auch dem Haupte allgemein, an welchem Schmerz es immer                   |
| <i>Viola hirta</i> aggr.    | Violaceae   | mon   | MF    | Veilchen           | top  | OTH | 40 leiden mag. Den Körper in Schlummer löst                                    |
| <i>Viola hirta</i> aggr.    | Violaceae   | mon   | MF    | Veilchen           | top  | OTH | trocknen die Milz, wenn man die Mischung trinkt oder der Milz                  |
| <i>Viola hirta</i> aggr.    | Violaceae   | mon   | MF    | Veilchen           | syst | RES | 40 aufliegt                                                                    |
| <i>Viola hirta</i> aggr.    | Violaceae   | mon   | MF    | Veilchen           | syst | RES | 40 Kinderhusten sowie gegen das Keuchen                                        |
| <i>Viola hirta</i> aggr.    | Violaceae   | mon   | MF    | Veilchen           | top  | SKE | Schädelknochen durch einen Schlag eingedellt, so dass der                      |
| <i>Viola hirta</i> aggr.    | Violaceae   | mon   | MF    | Veilchen           | top  | SKE | 40 Betroffenen die Sprache verloren hat, ...                                   |
| <i>Viola hirta</i> aggr.    | Violaceae   | mon   | MF    | Veilchen           | top  | SKE | 40 Fussgicht zur Milde zwingen                                                 |
| <i>Viola hirta</i> aggr.    | Violaceae   | ren   | LF    | Veilchen           | syst | DER | CLXXIII / CXVII Hals geschwären oder geschwulsten                              |
| <i>Viola hirta</i> aggr.    | Violaceae   | ren   | LF    | Veilchen           | top  | DER | CLXXIII / CXVII gut denen so der hinder heraus geet                            |
| <i>Viola hirta</i> aggr.    | Violaceae   | ren   | LF    | Veilchen           | top  | EYE | CLXXIII / CXVII unnd [hitzigen] augen                                          |
| <i>Viola hirta</i> aggr.    | Violaceae   | ren   | LF    | Veilchen           | syst | FEV | lescht aus unnd dempft die scherpfte der gallen und die übrige hitz            |
| <i>Viola hirta</i> aggr.    | Violaceae   | ren   | LF    | Veilchen           | syst | GAS | CLXXIII / CXVII des febers                                                     |
| <i>Viola hirta</i> aggr.    | Violaceae   | ren   | LF    | Veilchen           | syst | GAS | CLXXIII / CXVII linderung des stulgangs                                        |
| <i>Viola hirta</i> aggr.    | Violaceae   | ren   | LF    | Veilchen           | top  | GAS | CLXXIII / CXVII gut dem hitzigen magen                                         |
| <i>Viola hirta</i> aggr.    | Violaceae   | ren   | LF    | Veilchen           | syst | NER | CLXXIII / CXVII schenken den kinden so in hitz und fallenden sucht belien sind |
| <i>Viola hirta</i> aggr.    | Violaceae   | ren   | LF    | Veilchen           | syst | NER | CLXXIII / CXVII schenken den kinden so in hitz und fallenden sucht belien sind |
| <i>Viola hirta</i> aggr.    | Violaceae   | ren   | LF    | Veilchen           | syst | NER | CLXXIII / CXVII schenken den kinden so in hitz und fallenden sucht belien sind |
| <i>Viola hirta</i> aggr.    | Violaceae   | ren   | LF    | Veilchen           | syst | OTH | CLXXIII / CXVII ganz widerwerta den scorpionen                                 |
| <i>Viola hirta</i> aggr.    | Violaceae   | ren   | LF    | Veilchen           | syst | OTH | CLXXIII / CXVII ganz widerwerta den scorpionen                                 |
| <i>Viola hirta</i> aggr.    | Violaceae   | ren   | LF    | Veilchen           | syst | RES | CLXXIII / CXVII linderung] der rauen kelen                                     |
| <i>Viola hirta</i> aggr.    | Violaceae   | ren   | LF    | Veilchen           | syst | RES | CLXXIII / CXVII ist gut zu dem trucknen husten                                 |
| <i>Viola hirta</i> aggr.    | Violaceae   | s pop | JK    | Veilchen           | syst | GAS | p. 429 Brechreiz förderndes Mittel                                             |
| <i>Viola hirta</i> aggr.    | Violaceae   | s pop | JK    | Veilchen           | syst | RES | p. 429 Husten und Katarrh                                                      |
| <i>Viola hirta</i> aggr.    | Violaceae   | s pop | JK    | Veilchen           | syst | URO | p. 429 Nieren- und Blasenentzündung                                            |
| <i>Viola hirta</i> aggr.    | Violaceae   | s pop | KN    | Veilchen           | top  | DER | p. 487 erhitzte Geschwülste                                                    |
| <i>Viola hirta</i> aggr.    | Violaceae   | s pop | KN    | Veilchen           | top  | DER | p. 487 Angina, probates Gurgelwasser                                           |
| <i>Viola hirta</i> aggr.    | Violaceae   | s pop | KN    | Veilchen           | syst | NER | p. 487 Kopfweg und grosser Hitze im Kopf                                       |
| <i>Viola hirta</i> aggr.    | Violaceae   | s pop | KN    | Veilchen           | syst | RES | p. 487 Husten oder Keuchhusten, Schwindsüchtigen lindert er den Husten         |
| <i>Viola hirta</i> aggr.    | Violaceae   | s pop | KN    | Veilchen           | top  | SKE | p. 487 Podagra                                                                 |
| <i>Viola hirta</i> aggr.    | Violaceae   | s pop | UB    | Veilchen           | syst | RES | p. 223 Auswurf Förderung                                                       |
| <i>Viola hirta</i> aggr.    | Violaceae   | sci   | ESCOP | Viola herba cum Fl | syst | DER | skin disorders such as eczema, seborrhoea, impetigo and acne, as               |
| <i>Viola hirta</i> aggr.    | Violaceae   | sci   | ESCOP | Viola herba cum Fl | top  | DER | II p. 280 well as cradle cap and nappy rash of infants                         |
| <i>Viola hirta</i> aggr.    | Violaceae   | sci   | ESCOP | Viola herba cum Fl | top  | DER | II p. 280 well as cradle cap and nappy rash of infants                         |
| <i>Vitis vinifera</i> aggr. | Vitaceae    | ant   | DIOS  | Weinrebe           | n.d. | ANT | Die Trester endlich helfen bei [Verrenkungen], Schlangenbiss [und              |
| <i>Vitis vinifera</i> aggr. | Vitaceae    | ant   | DIOS  | Weinrebe           | top  | DER | Milzentzündungen], wenn sie mit Rosenöl, Raute und Essig                       |
| <i>Vitis vinifera</i> aggr. | Vitaceae    | ant   | DIOS  | Weinrebe           | top  | DER | p. 264 angewandt werden.                                                       |
| <i>Vitis vinifera</i> aggr. | Vitaceae    | ant   | DIOS  | Weinrebe           | top  | DER | p. 264 heilt die am After gebildeten Geschwülste und Feig- warzen              |
| <i>Vitis vinifera</i> aggr. | Vitaceae    | ant   | DIOS  | Weinrebe           | top  | DER | Eingestrichen heilt sie auch Flechten, Krätze und Aussatz; Mit Oel dauernd     |
| <i>Vitis vinifera</i> aggr. | Vitaceae    | ant   | DIOS  | Weinrebe           | top  | DER | eingesalbt vertreibt sie die Haare, besonders (thut dies) auch die             |
| <i>Vitis vinifera</i> aggr. | Vitaceae    | ant   | DIOS  | Weinrebe           | top  | DER | aus                                                                            |
| <i>Vitis vinifera</i> aggr. | Vitaceae    | ant   | DIOS  | Weinrebe           | top  | DER | den angebrannten Zweigen ausschwitzende Flüssigkeit;                           |
| <i>Vitis vinifera</i> aggr. | Vitaceae    | ant   | DIOS  | Weinrebe           | top  | DER | p. 264 aufgestrichen bringt diese auch Warzen weg                              |
| <i>Vitis vinifera</i> aggr. | Vitaceae    | ant   | DIOS  | Weinrebe           | top  | DER | bei Dysenterie, Blut- auswurf, Magenschmerzen und falschem                     |
| <i>Vitis vinifera</i> aggr. | Vitaceae    | ant   | DIOS  | Weinrebe           | top  | DER | Appetit schwangerer Frauen                                                     |
| <i>Vitis vinifera</i> aggr. | Vitaceae    | ant   | DIOS  | Weinrebe           | top  | DER | p. 264 mit Graupen Entzündung und Brand des Magens                             |
| <i>Vitis vinifera</i> aggr. | Vitaceae    | ant   | DIOS  | Weinrebe           | top  | DER | p. 264 zertrümmert den Stein, wenn sie mit Wein genommen wird                  |
| <i>Vitis vinifera</i> aggr. | Vitaceae    | ant   | DIOS  | Weinrebe           | top  | DER | p. 264 fein gestossen als Umschlag, lindert Kopfschmerzen                      |
| <i>Vitis vinifera</i> aggr. | Vitaceae    | ant   | DIOS  | Weinrebe           | top  | NER | p. 264 Die Trester endlich helfen bei [Verrenkungen, Schlangenbiss und]        |
| <i>Vitis vinifera</i> aggr. | Vitaceae    | ant   | DIOS  | Weinrebe           | n.d. | OTH | Milzentzündungen, wenn sie mit Rosenöl, Raute und Essig                        |
| <i>Vitis vinifera</i> aggr. | Vitaceae    | ant   | DIOS  | Weinrebe           | n.d. | OTH | p. 264 angewandt werden.                                                       |
| <i>Vitis vinifera</i> aggr. | Vitaceae    | ant   | DIOS  | Weinrebe           | n.d. | OTH | Die Trester endlich helfen bei Verrenkungen, [Schlangenbiss und                |
| <i>Vitis vinifera</i> aggr. | Vitaceae    | ant   | DIOS  | Weinrebe           | n.d. | OTH | Milzentzündungen], wenn sie mit Rosenöl, Raute und Essig                       |
| <i>Vitis vinifera</i> aggr. | Vitaceae    | ant   | DIOS  | Weinrebe           | n.d. | OTH | p. 264 angewandt werden.                                                       |
| <i>Vitis vinifera</i> aggr. | Vitaceae    | mon   | HvB   | Weinrebe           | top  | DER | 3-54 Geschwüre, Wunden                                                         |
| <i>Vitis vinifera</i> aggr. | Vitaceae    | mon   | HvB   | Weinrebe           | top  | EAR | 3-54 Ohrenschmerzen                                                            |
| <i>Vitis vinifera</i> aggr. | Vitaceae    | mon   | HvB   | Weinrebe           | top  | EYE | 3-54 trübe Augen                                                               |
| <i>Vitis vinifera</i> aggr. | Vitaceae    | mon   | HvB   | Weinrebe           | syst | GAS | 3-54 Schmerzen im Magen                                                        |
| <i>Vitis vinifera</i> aggr. | Vitaceae    | mon   | HvB   | Weinrebe           | top  | NER | 3-54 Kopfschmerzen                                                             |
| <i>Vitis vinifera</i> aggr. | Vitaceae    | mon   | HvB   | Weinrebe           | syst | RES | 3-54 Schmerzen in der Brust                                                    |
| <i>Vitis vinifera</i> aggr. | Vitaceae    | mon   | HvB   | Weinrebe           | top  | TEE | 3-54 Fleisch um die Zähne fault, Zähne schwach sind                            |
| <i>Vitis vinifera</i> aggr. | Vitaceae    | mon   | HvB   | Weinrebe           | syst | URO | 3-54 Harn wegen Kälte im Magen nicht halten kann                               |
| <i>Vitis vinifera</i> aggr. | Vitaceae    | ren   | LF    | Weinrebe           | top  | DER | XLVI / XXIX heylet es geflecht, rauden unnd allerley grind                     |
| <i>Vitis vinifera</i> aggr. | Vitaceae    | ren   | LF    | Weinrebe           | top  | DER | XLVI / XXIX heylet die blätter unnd runtzeln am hindern                        |
| <i>Vitis vinifera</i> aggr. | Vitaceae    | ren   | LF    | Weinrebe           | vol  | DER | XLVI / XXIX vertreibt das har unnd macht glatt                                 |
| <i>Vitis vinifera</i> aggr. | Vitaceae    | ren   | LF    | Weinrebe           | top  | EYE | XLVI / XXIX ist auch gut den augen                                             |
| <i>Vitis vinifera</i> aggr. | Vitaceae    | ren   | LF    | Weinrebe           | syst | GAS | seind sie dem magen dienstlich, bringen lust zu essen unnd                     |
| <i>Vitis vinifera</i> aggr. | Vitaceae    | ren   | LF    | Weinrebe           | syst | GAS | XLVI / XXIX krefftigen die schwachen                                           |
| <i>Vitis vinifera</i> aggr. | Vitaceae    | ren   | LF    | Weinrebe           | syst | GAS | XLVI / XXIX seind dem ziehen zusammen unnd seind dem magen angemem             |
| <i>Vitis vinifera</i> aggr. | Vitaceae    | ren   | LF    | Weinrebe           | syst | GAS | XLVI / XXIX rote rhur unnd den bauchfluss haben                                |
| <i>Vitis vinifera</i> aggr. | Vitaceae    | ren   | LF    | Weinrebe           | top  | GAS | XLVI / XXIX roten rhur und kein speis behalten                                 |
| <i>Vitis vinifera</i> aggr. | Vitaceae    | ren   | LF    | Weinrebe           | top  | GAS | die roten rhur haben, blut auspürzenunnd einen schwachen                       |
| <i>Vitis vinifera</i> aggr. | Vitaceae    | ren   | LF    | Weinrebe           | syst | GAS | XLVI / XXIX magen haben / un den weibern die seltzam ding zu essen gelüset     |
| <i>Vitis vinifera</i> aggr. | Vitaceae    | ren   | LF    | Weinrebe           | top  | GAS | XLVI / XXIX mildern die entzündung unnd die übrige hitz des magens             |



|                             |          |       |       |                        |           |                                                                                                                                                                                     |
|-----------------------------|----------|-------|-------|------------------------|-----------|-------------------------------------------------------------------------------------------------------------------------------------------------------------------------------------|
|                             |          |       |       |                        |           | haben sie gleiche kraft unnd würckung [die roten rhur haben, blut<br>auspürzten unnd einen schwachen magen haben / un den weibern<br>XLVI / XXIX die seltzam ding zu essen gelüset] |
| <i>Vitis vinifera</i> aggr. | Vitaceae | ren   | LF    | Weinrebe               | syst. GAS |                                                                                                                                                                                     |
| <i>Vitis vinifera</i> aggr. | Vitaceae | ren   | LF    | Weinrebe               | syst. GYN | XLVI / XXIX stellen auch der weiber bloedigkeit<br>ziehen die zaehen kalten feüchtigkeyten an sich unnd reynigen das                                                                |
| <i>Vitis vinifera</i> aggr. | Vitaceae | ren   | LF    | Weinrebe               | top. NER  | XLVI / XXIX haubt                                                                                                                                                                   |
| <i>Vitis vinifera</i> aggr. | Vitaceae | ren   | LF    | Weinrebe               | top. NER  | XLVI / XXIX lindern die weetenagen des haubts                                                                                                                                       |
| <i>Vitis vinifera</i> aggr. | Vitaceae | ren   | LF    | Weinrebe               | n.d. RES  | XLVI / XXIX dienstlich dem husten                                                                                                                                                   |
| <i>Vitis vinifera</i> aggr. | Vitaceae | ren   | LF    | Weinrebe               | top. SKE  | XLVI / XXIX gut den verruckten gliedern                                                                                                                                             |
| <i>Vitis vinifera</i> aggr. | Vitaceae | ren   | LF    | Weinrebe               | n.d. URO  | XLVI / XXIX [dienstlich] nieren und blasen                                                                                                                                          |
| <i>Vitis vinifera</i> aggr. | Vitaceae | ren   | LF    | Weinrebe               | syst. URO | XLVI / XXIX treibt den stein                                                                                                                                                        |
| <i>Vitis vinifera</i> aggr. | Vitaceae | s pop | UB    | Weinrebe               | syst. CAR | p. 410 Venöse Insuffizienz<br>discomfort and heaviness of legs related to minor venous                                                                                              |
| <i>Vitis vinifera</i> aggr. | Vitaceae | sci   | EMA   | Weinrebe               | top. DER  | A/HPMC/5816/2010 circulatory disturbances<br>symptomatic treatment of problems related to varicosis such as                                                                         |
| <i>Vitis vinifera</i> aggr. | Vitaceae | sci   | ESCOP | Vitis viniferae folium | syst. DER | I p. 285 painful and heavy legs                                                                                                                                                     |
| <i>Vitis vinifera</i> aggr. | Vitaceae | sci   | ESCOP | Vitis viniferae folium | top. DER  | I p. 285 topical treatment of varicosis and couperosis                                                                                                                              |

**Abbreviations:**

era and herbal cf. Table 1, maintext

use-categories cf. Table 2, maintext
